# Supplementary material for: Asymmetric synthesis of propargylamines as amino acid surrogates in peptidomimetics
Source: publisher site journal article supplement (doi:10.3762/bjoc.13.240), 2017-11-15

# **Supporting Information**

**for**

## **Asymmetric synthesis of propargylamines as amino acid surrogates in peptidomimetics**

Matthias Wunsch, David Schröder, Tanja Fröhr, Lisa Teichmann, Sebastian Hedwig, Nils Janson, Clara Belu, Jasmin Simon, Shari Heidemeyer, Philipp Holtkamp, Jens Rudlof, Lennard Klemme, Alessa Hinzmann, Beate Neumann, Hans-Georg Stammer and Norbert Sewald\*

Address: Organic and Bioorganic Chemistry, Department of Chemistry, Bielefeld University,  
Universitätsstraße 25, D-33615 Bielefeld, Germany

Email: Norbert Sewald - [norbert.sewald@uni-bielefeld.de](mailto:norbert.sewald@uni-bielefeld.de)

\* Corresponding author

**Details about the experiments, methods and materials, the X ray crystal  
structures and NMR spectra**

## Table of contents

|                                                                                       |      |
|---------------------------------------------------------------------------------------|------|
| General methods and materials .....                                                   | S3   |
| Abbreviations .....                                                                   | S6   |
| General Procedures .....                                                              | S7   |
| Synthesis.....                                                                        | S11  |
| Ethyl (3-Hydroxypropynyl)-benzoate derivatives <b>1</b> .....                         | S11  |
| Ethyl (3-Oxopropynyl)-benzoate derivatives <b>2</b> .....                             | S11  |
| Ethyl ( <i>tert</i> -Butylsulfinyl)imino)propynyl)benzoate derivatives <b>3</b> ..... | S12  |
| Ethyl benzoate substituted propargylamine derivatives <b>4</b> .....                  | S13  |
| Chiral aldimines <b>5</b> .....                                                       | S16  |
| TMS protected propargylamines <b>6</b> .....                                          | S35  |
| Propargylamines <b>7</b> .....                                                        | S43  |
| Hydrolysis of imine <b>5</b> forms hemiaminal <b>8</b> .....                          | S56  |
| Side-product <b>9k</b> of the conversion of <b>5k</b> with GP-3 .....                 | S57  |
| Side-product <b>10k</b> of the conversion of <b>5k</b> with GP-4.....                 | S58  |
| Sonogashira cross-coupling products as peptidomimetics <b>11</b> .....                | S59  |
| Rearrangementproducts: $\alpha,\beta$ -unsaturated imines <b>12</b> .....             | S60  |
| Intramolecular Huisgen reaction of <b>6w</b> gives triazole <b>13w</b> .....          | S61  |
| Intramolecular Huisgen reaction of <b>7wx</b> gives triazole <b>14w</b> .....         | S62  |
| References .....                                                                      | S63  |
| X-ray structure analysis.....                                                         | S65  |
| Spectra.....                                                                          | S100 |

## General methods and materials

If not mentioned differently, all reagents and solvents were purchased from commercial sources and applied without further purification. THF was kept over KOH before being dried with sodium/benzophenone under reflux and was freshly distilled before use. Toluene was predried over  $\text{CaCl}_2$ , then dried over sodium under reflux and distilled freshly before use. DCM used for synthesis was predried over  $\text{CaCl}_2$ , dried over  $\text{CaH}_2$  under reflux and distilled freshly before use. DMSO was dried under reflux over  $\text{CaH}_2$ , distilled and stored over molecular sieves (4 Å) until use. DCM, EtOAc, PE and  $\text{Et}_2\text{O}$  used for aqueous work-ups or column chromatography were purchased in technical grade and distilled prior to application.

*Schlenk* conditions: If not mentioned differently, the reactions were carried out under exclusion of moisture and oxygen in dried glassware under argon atmosphere. The argon gas was supplied from Linde (quality 4.0) and passed through a column filled with phosphor pentoxide (sicapent®, Merck) before use.

Solvents were removed on a rotational evaporator at 40 °C and appropriately reduced pressure. Solvent residues were removed at rt and 0.001–0.1 mbar.

For column chromatography, Silica gel 60, 40–63 µm (Merck) was used. The eluents and their proportions are individually noted. Thin layer chromatography (TLC) was executed using silica gel 60 coated aluminium sheets with fluorescence indicator F254 (Merck). Spots were identified using different stains, such as  $\text{KMnO}_4$ , iodine, ninhydrin or UV light with a wavelength of  $\lambda = 254 \text{ nm}$  or  $\lambda = 366 \text{ nm}$ .

Preparative HPLC (Thermo Separation Products): Equipment: UV detector: UV1000; pump: Thermo Separation Products P4000; Method: column: Thermo Scientific Hypersil Gold (8 µm), 250 × 21.2 mm cartridge; flow rate: 10.00 mL min<sup>-1</sup>; injection volume: 1.00 mL; detection at  $\lambda = 254 \text{ nm}$ ; solvents: A: water/acetonitrile/trifluoroacetic acid (94.9:5:0.1); B: water/acetonitrile/trifluoroacetic acid (5:94.9:0.1). gradient elution: (A %): 0–1 min: 100%, 1–30 min: gradient from 100% to 0%, 30–44 min: 0 %, 44–45 min: gradient from 100% to 0%.

Melting points: Melting points were determined using a Büchi 540 melting point apparatus and are uncorrected.

Optical rotation was measured on a DIP-360 (Jasco) polarimeter with a sodium vapour light source at a specific given temperature. A quartz cell with a path length of 10 cm was used. The average of ten single measurements divided by the concentration in units of g/mL and the

pathlength (1 dm). The sample concentration and solvent is given in  $c = \text{g}/100 \text{ mL}$  in parentheses.

Nuclear magnetic resonance (NMR) spectra were recorded on Bruker Avance 300 (300.13 MHz for  $^1\text{H}$ , 282.38 MHz for  $^{19}\text{F}$ , 75.48 MHz for  $^{13}\text{C}$ ) or DRX 500 (499.87 MHz for  $^1\text{H}$ , 470.43 MHz for  $^{19}\text{F}$ , 125.70 MHz for  $^{13}\text{C}$ ) or Avance 500 (500.01 MHz for  $^1\text{H}$ , 125.74 MHz for  $^{13}\text{C}$ ) or Avance 500 HD (500.20 MHz for  $^1\text{H}$ , 125.79 MHz for  $^{13}\text{C}$ ) or Avance 600 (600.13 MHz for  $^1\text{H}$ , 564.63 MHz for  $^{19}\text{F}$ , 150.92 MHz for  $^{13}\text{C}$ ). Chemical shifts ( $\delta$ ), given in the experimental section, are reported in ppm relative to TMS ( $\delta_{\text{TMS}} = 0 \text{ ppm}$ ) and referenced to the solvent residue signals as internal standard:  $\delta_i$  [ppm]:  $\text{CHCl}_3$  ( $\delta$  7.26 ppm ( $^1\text{H}$  NMR) and  $\delta$  77.2 ppm ( $^{13}\text{C}$  NMR)) and  $\text{CHD}_2\text{OD}$  ( $\delta$  3.31 ppm ( $^1\text{H}$  NMR) and  $\delta$  49.0 ppm ( $^{13}\text{C}$  NMR)) and  $\text{D}_2\text{HCSOCD}_3$  ( $\delta$  2.50 ppm ( $^1\text{H}$  NMR) and  $\delta$  39.5 ppm ( $^{13}\text{C}$  NMR)). Coupling constants ( $J$ ) are reported in Hertz (Hz) with 0.05 Hz resolution. Multiplicities are described as singlet (s), doublet (d), triplet (t) quartet (q) or multiplet (m). The assignments of  $^{13}\text{C}$  and  $^1\text{H}$  NMR signals were supported by 2D NMR techniques (COSY, HMQC, HMBC).

MS: Nano-ESI mass spectra were recorded using an Esquire 3000 ion trap mass spectrometer (Bruker Daltonik GmbH, Bremen, Germany) equipped with a standard nano-ESI source. Samples were introduced by static nano-ESI using *in-house* pulled glass emitters. Nitrogen served both as the nebuliser gas and the dry gas. Nitrogen was generated by a Bruker nitrogen generator NGM 11. Helium served as cooling gas for the ion trap and collision gas for MS<sup>n</sup> experiments.

ESI mass spectra were recorded using an Agilent 6220 time-of-flight mass spectrometer (Agilent Technologies, Santa Clara, CA, USA) in extended dynamic range mode equipped with a Dual-ESI source, operating with a nitrogen generator NGM 11. Samples were introduced with a 1200 HPLC system consisting of an autosampler, degasser, binary pump, column oven and diode array detector (Agilent Technologies, Santa Clara, CA, USA) using a C18 Hypersil Gold column (length: 50 mm, diameter: 2.1 mm particle size: 1.9  $\mu\text{m}$ ) with a short gradient (in 4 min from 0% B to 98% B, back to 0% B in 0.2 min, total run time 7.5 min) at a flow rate of 250  $\mu\text{L min}^{-1}$  and column oven temperature of 40  $^\circ\text{C}$ . HPLC solvent A consisted of water, acetonitrile and formic acid (94.9:5:0.1), solvent B of water, acetonitrile and formic acid (5:94.9:0.1). The mass axis was externally calibrated with ESI-L Tuning Mix (Agilent Technologies, Santa Clara, CA, USA) as calibration standard.

Elemental analyses were performed on an Element Analyser EURO EA.



IR spectra were recorded as neat samples on a FT-IR spectrophotometer Nicolet 380 (Thermo Scientific) equipped with ATR technique (smart orbit).

Analytical HPLC (Thermo Scientific Accela): Equipment; UV detector: Thermo Separation Products UV6000LP; pump: Thermo Separation Products P4000; autosampler: Thermo Separation Products AS100, Method: column: Jupiter 5 C18 Fa. Phenomenex, 250 × 4.60 mm cartridge; flow rate: 1.00 mL/min; injection volume: 0.2 µL; detection at  $\lambda = 254$  nm; solvents: A: water/acetonitrile/trifluoroacetic acid (95.9:5:0.1); B: water/acetonitrile/trifluoroacetic acid (5:95.9:0.1). Gradient elution: (A, method 1): 0–9 min: gradient from 100% to 0%, 9–12 min: 0%, 12–13 min: gradient from 0% to 100%. (A, method 1): 0–4.5 min: gradient from 100% to 0%, 4.5–7 min: 0%, 7–8 min: gradient from 100% to 0%.

Crystal data were collected on an Agilent SuperNova diffractometer with Cu K $\alpha$  radiation except for **12k** and **10k**, where Mo K $\alpha$  radiation was used. The crystals were kept at 100.0(3) K during data collection. Using Olex2 [1] the structures were solved and refined with the ShelX program package [2] using direct methods and least-squares minimization. Details of the X-ray investigation are given in SI. CCDC 1566791 (**7a**), CCDC 1566792 (**7c**), CCDC 1566793 (**7d**), CCDC 1566794 (**e**), CCDC 1566795 (**7i**), CCDC 1566796 (**7j**), CCDC 1566797 (**7k**), CCDC 1566798 (**7q**), CCDC 1566799 (**7s**), CCDC 1566800 (**10k**), CCDC 1566801 (**11i**), CCDC 1566802 (**12i**), CCDC 1566803 (**12k**) and CCDC 1566804 (**13w**) contain the supplementary crystallographic data for this paper. These data can be obtained free of charge from The Cambridge Crystallographic Data Centre via [www.ccdc.cam.ac.uk/data\\_request/cif](http://www.ccdc.cam.ac.uk/data_request/cif).

## Abbreviations

|                   |                                        |      |                               |
|-------------------|----------------------------------------|------|-------------------------------|
|                   |                                        | IR   | Infrared                      |
| ACN               | Acetonitrile                           | M    | Molar [ $\text{mol L}^{-1}$ ] |
| All               | Allyl                                  | Me   | Methyl                        |
| ar                | Aryl                                   | MeOH | Methanol                      |
| Bn                | Benzyl                                 | MHz  | Megahertz                     |
| Boc               | <i>tert</i> -Butoxycarbonyl            | m    | Multiplet                     |
| Bu                | Butyl                                  | mp   | Melting Point                 |
| cy                | cyclohexyl                             | MS   | Mass Spectrometry             |
| d                 | doublet                                | NMR  | Nuclear Magnetic Resonance    |
| DCM               | Dichlormethane                         | Ph   | Phenyl                        |
| DMSO              | Dimethylsulfoxide                      | q    | Quartet                       |
| dr                | Diastereomeric Ratio                   | rt   | Room Temperature              |
| ee                | Enantiomeric Excess                    | s    | Singlet                       |
| eq                | Equivalents                            | TFA  | Trifluoroacetic Acid          |
| ESI               | Electrospray Ionization                | THF  | Tetrahydrofuran               |
| Et                | Ethyl                                  | TLC  | Thin Layer Chromatography     |
| Et <sub>2</sub> O | Diethyl Ether                          | TMS  | Trimethylsilyl                |
| EtOAc             | Ethylacetate                           | t    | Triplet                       |
| FT                | Fourier Transform                      | UV   | Ultra Violet                  |
| h                 | Hours                                  | Vis  | Visible                       |
| HPLC              | High Performance Liquid Chromatography |      |                               |

## General Procedures

### *Condensation of aldehydes with Ellman's chiral sulfinamide to form imines 5*

GP-1: *tert*-Butylsulfinamide (**S**)-**1** or (**R**)-**1** (1 equiv) was dissolved in freshly distilled aldehyde (1 equiv) and Ti(OEt)<sub>4</sub> (2 equiv) was added in one portion. The slightly yellow suspension turned brightly orange upon heating for 40 min (approximately 60 °C) under reflux conditions. After cooling to rt, the suspension was diluted with EtOAc (40 mL) and brine (1 mL) was added dropwise leading to the formation of a colourless precipitate. The solid was filtered through a pad of celite and washed with EtOAc (200 mL). Evaporation of the solvent in vacuo yielded the aldimine (**5b**, **5c**, **5h**, **5i**, **5t**) in pure form to be converted without further purification. Typical reactions were carried out on a scale of 1–3 g of *tert*-Butylsulfinamide (**S**)-**1** or (**R**)-**1**. Analogous reaction conditions have already been described by Ellman et al. and Yus et al. [3–5].

GP-2: *tert*-Butylsulfinamide (**S**)-**1** or (**R**)-**1** (1 equiv) was dissolved in CH<sub>2</sub>Cl<sub>2</sub> (1 M solution) and freshly prepared aldehyde (1.2 equiv), as well as dried CuSO<sub>4</sub> (1.5–2.0 equiv) was added in one portion. The colourless reaction mixture was stirred for 72 h at rt. After complete conversion of the sulfinamide (monitored by TLC), the suspension was diluted with a KHSO<sub>4</sub> solution (5%). The aqueous layer was separated, extracted twice with CH<sub>2</sub>Cl<sub>2</sub> and the combined organic layers were dried over Na<sub>2</sub>SO<sub>4</sub>. Evaporation of the solvent in vacuo yielded the desired sulfinylimines (**5d-g**, **5j-l**, **5n-q**, **5s**, **5v**, **5w**). In some cases, purification by column chromatography was necessary. Typical reactions were carried out on a scale of 0.2–3 g of *tert*-Butylsulfinamide (**S**)-**1** or (**R**)-**1**. Analogous reaction conditions have already been described by Ellman et al. [6].

### *Diastereoselective nucleophilic addition of trimethylsilylethynyl lithium to chiral sulfinimines 5 to form TMS-protected alkynes 6.*

GP-3: At –78 °C, *n*-BuLi (1.6 M in *n*-hexane, 1.6 equiv) was added dropwise to a 0.85 M solution of ethynyltrimethylsilane (1.5 equiv) in THF. After 2 h, a 0.35 M solution of aldimine **5** (1.0 equiv) and Ti(OiPr)<sub>4</sub> (0.5 equiv) in THF was added to the reaction mixture over a period of 30 min. After complete conversion (approximately 2 h, monitored by TLC), the reaction mixture was allowed to warm up to rt. Subsequently, a saturated aqueous solution

of  $\text{NH}_4\text{Cl}$  was added until no further precipitate was formed. The colourless solid was filtered through a pad of celite, and the pad was washed with EtOAc (200 mL). The filtrate was dried over  $\text{Na}_2\text{SO}_4$  and the solvent evaporated under reduced pressure. The crude product was directly applied for desilylation. This method was applied for the synthesis of **6a-d**, **6n** and **6t**. Typical reactions were carried out on a scale of 0.5–3 g of imine **5**. Analogous reaction conditions have already been described by Ellman et al. and Tartakovski et al. [7–9].

GP-4: At  $-78\text{ }^\circ\text{C}$ , *n*-BuLi (1.6 M in *n*-hexane, 1.6 equiv) was added dropwise to a 0.85 M solution of ethynyltrimethylsilane (1.5 equiv) in toluene. After 2 h, a solution of aldimine **5** (1.0 equiv) and  $\text{AlMe}_3$  (0.5 equiv) in toluene (0.35 M sol.) was added to the reaction mixture over a period of 30 min. After complete conversion (approximately 2 h, monitored by TLC), the reaction mixture was allowed to warm up to rt. The reaction mixture was diluted with a solution of  $\text{KHSO}_4$  (5%), the organic layer was separated and washed with another portion of  $\text{KHSO}_4$  solution (5%). The combined aqueous layers were extracted with  $\text{Et}_2\text{O}$  ( $4 \times 50\text{ mL}$ ). The combined organic layers were dried over  $\text{Na}_2\text{SO}_4$  and the solvent was evaporated under reduced pressure. The crude alkyne **6** was directly applied for desilylation. This method was used for the synthesis of **6e-j**, **6p**, **6o**. Typical reactions were carried out on a scale of 0.2–5 g of imine **5**. Analogous reaction conditions have already been described by Ellman et al., Yus et al., Tan et al., Lin et al. and Hou et al. [9–14].

#### *Desilylation of alkynes to yield propargylamine 7*

GP-5: In this procedure, no *Schlenk*-conditions were applied. TMS protected alkyne **6** (1.0 equiv) was dissolved in THF to give a 0.2 M solution and a 1 M solution of TBAF in THF (2 equiv) was added dropwise at  $0\text{ }^\circ\text{C}$ . The reaction mixture was stirred for 2 h at  $0\text{ }^\circ\text{C}$  and for another 2 h at rt. After complete conversion (monitored by TLC), the reaction mixture was diluted with a saturated  $\text{NH}_4\text{Cl}$  solution. The emulsion was extracted with  $\text{Et}_2\text{O}$  ( $4 \times 50\text{ mL}$ ) and the combined organic layers were dried over  $\text{Na}_2\text{SO}_4$ . After evaporation of the solvent, the crude product was purified by column chromatography (in most cases EtOAc/PE, 1:2 or 1:1). The diastereomerically pure propargylamines **7** were isolated by recrystallization. This reaction procedure was used for the synthesis of **7a-e**, **7h**, **7n-p** and **7t**. Typical reactions were carried out on a scale of 0.4–5 g of TMS protected alkyne **6**. Analogous reaction conditions have already been described by Du Bois et al., Isobe et al. and Vasella et al. [15–17].

GP-6: In this procedure, no *Schlenk*-conditions were applied. TMS protected alkyne **6** (1.0 equiv) was dissolved in a mixture of THF/H<sub>2</sub>O (98:2) to give a 0.1 M solution and a 0.3 M solution of KF (1.1 equiv) and 18-crown-6 (1.1 equiv) in THF/H<sub>2</sub>O (98:2) was added dropwise at 0 °C. After complete conversion (monitored by TLC, about 2.5 h), the reaction mixture was diluted with a saturated aqueous solution of NH<sub>4</sub>Cl and extracted with Et<sub>2</sub>O (3 × 50 mL). The combined organic layers were dried over Na<sub>2</sub>SO<sub>4</sub> and the solvent was evaporated. The crude product was purified by column chromatography (in most cases EtOAc/PE, 1:2). The diastereomerically pure propargylamines **7** were isolated by recrystallization. This reaction procedure was applied for the synthesis of **7g**, **7j-l**, **7q**, **7s**, **7vx** and **7wx**. Typical reactions were carried out on a scale of 0.4–5 g of TMS protected alkyne **6**. Analogous reaction conditions have already been described by Vasella et al. [18].

GP-7: In this procedure, no *Schlenk*-conditions were applied. TMS protected alkyne **6** (8.27 mmol, 1.0 equiv) was dissolved in EtOH (80 mL) and a solution of AgNO<sub>3</sub> (22.3 mmol, 2.7 equiv) in EtOH/H<sub>2</sub>O (60 mL, 58:42) was added dropwise at rt. After 20 min, a 4 M aqueous solution of KCN (99.2 mmol, 12.0 equiv) was added and the reaction mixture was neutralised with hydrochloric acid (1 M). After 2 h the mixture was concentrated up under reduced pressure and afterwards extracted with Et<sub>2</sub>O (3 × 40 mL). The combined organic layers were dried over Na<sub>2</sub>SO<sub>4</sub> and the solvent was evaporated. The crude product was purified by column chromatography (EtOAc/PE, 1:2). The diastereopure propargylamines **7** were isolated by recrystallization. These reaction conditions were only used for the synthesis of **7i** (typically 0.3–3 g). Analogous reaction conditions have already been described by Vasella et al. [17].

### *Swern Oxidation*

GP-8: DMSO (50 mmol) was added dropwise to a solution of oxalylchloride (25 mmol) in DCM (60 mL) at –78 °C. After 2 min, a solution of the alcohol (23 mmol) in DCM (30 mL) was added over a period of 5 min. The reaction mixture was stirred for 30 min, before NEt<sub>3</sub> (115 mmol) was added. The resulting slurry was stirred for further 30 min at –78 °C and then warmed up to rt. The suspension was washed with water (50 mL) and a solution of KHSO<sub>4</sub> (5 %, 30 mL). The aqueous layers were extracted with DCM (2 × 30 mL) and the combined organic layers were washed with brine (20 mL) and dried over Na<sub>2</sub>SO<sub>4</sub> before the solvent was evaporated under reduced pressure. The prepared aldehyde was directly converted or purified

by column chromatography or distillation. Typical reactions were carried out on a scale of 0.5–10 g of alcohol. The synthesis was carried out as described by Swern et al. [19].

*Sonogashira cross coupling of propargylamine 7 to peptidomimetic 11*

GP-9: DIPEA (6 equiv) was added to a solution of propargylamine **7** (1 equiv) and the methyl iodo-benzoate derivative (1.6 equiv) in THF (THF/DIPEA = 3:1). The reaction mixture was degassed by freeze pump thaw method, until no more gas atmosphere could be detected by the manometer. The catalysts,  $\text{Cl}_2\text{Pd}(\text{PPh}_3)_2$  (2 mol %) and CuI (1 mol %) were added to the frozen reaction mixture and the solution slowly warmed to room temperature. After 30–120 min, a colourless precipitate formed in the clear solution, indicating the progress of the reaction. At least 2–8 h later, the suspension was diluted with a saturated aqueous  $\text{NH}_4\text{Cl}$  solution and  $\text{KHSO}_4$  (aq, 5 %) was added, until the organic layer started to turn faintly red (pH 5–6). The emulsion was diluted with  $\text{Et}_2\text{O}$ , the organic layer separated and the organic layer extracted to more times with  $\text{Et}_2\text{O}$ . The combined organic layers were dried over  $\text{Na}_2\text{SO}_4$  and the solvent was evaporated in vacuum. The crude product was purified by column chromatography. Typical reactions were carried out on a scale of 0.1–0.5 g of propargylamine **7**. Similar reactions have already been described by Hashmi [20], Ishida [21] and Wong et al. [22].

## Synthesis

### Ethyl (3-hydroxypropynyl)-benzoate derivatives 1

#### Ethyl 4-(3-hydroxyprop-1-yn-1-yl)benzoate (**1a**)

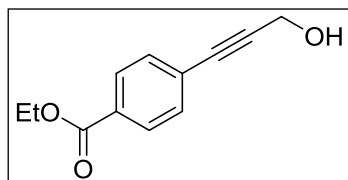

Synthesis: GP-9, reaction scale: 25.2 mmol of prop-2-yn-1-ol. Instead of DIPEA, 6 equivalents of piperidine were used. Isolation by column chromatography (PE/EtOAc, 4:1). Compound **1a** has been first described by Soler et al. [23].

Colourless crystals, yield: 4.32 g, 21.2 mmol, 84 %.  $^1\text{H}$  NMR (300 MHz, Chloroform-*d*)  $\delta$  = 7.99 (d,  $^3J$  = 8.5 Hz, 2H, ar-2-**H**, ar-6-**H**), 7.49 (d,  $^3J$  = 8.5 Hz, 2H, ar-3-**H**, ar-5-**H**), 4.52 (s, 2H, **CH**<sub>2</sub>OH), 4.38 (q,  $^3J$  = 7.1 Hz, 1H, O**CH**<sub>2</sub>CH<sub>3</sub>), 1.39 (t,  $^3J$  = 7.1 Hz, 2H, OCH<sub>2</sub>**CH**<sub>3</sub>). C<sub>12</sub>H<sub>12</sub>O<sub>3</sub> (204.23 g mol<sup>-1</sup>). TLC:  $R_f$  (EtOAc/PE, 1:4) = 0.28.

#### Ethyl 3-(3-hydroxyprop-1-yn-1-yl)benzoate (**1b**)

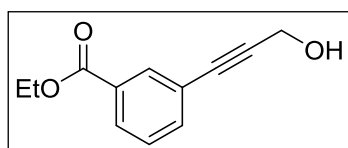

Synthesis: GP-9, reaction scale: 1.153 mmol of prop-2-yn-1-ol. Isolation by column chromatography (PE/EtOAc, 2:1). Compound **1b** has been described first by Chuang, Gallucci and Hart [24].

Colourless crystals, yield: 209.6 mg, 1.026 mmol, 89 %.  $^1\text{H}$  NMR (500 MHz, Chloroform-*d*)  $\delta$  = 8.03 (dd,  $^4J$  = 1.8 Hz,  $^4J$  = 1.5 Hz, 1H, ar-2-**H**), 7.92 (dd,  $^3J$  = 7.8 Hz,  $^4J$  = 1.5 Hz, 1H, ar-6-**H**), 7.51 (dd,  $^3J$  = 7.7 Hz,  $^4J$  = 1.5 Hz, 1H, ar-4-**H**), 7.30 (dd,  $^3J$  = 7.8 Hz,  $^3J$  = 7.8 Hz, 1H, ar-5-**H**), 4.48 (s, 2H, **CH**<sub>2</sub>OH), 4.32 (q,  $^3J$  = 7.1 Hz, 2H, O**CH**<sub>2</sub>CH<sub>3</sub>), 3.18 (s, 1H, **CH**<sub>2</sub>OH), 1.33 (t,  $^3J$  = 7.2 Hz, 3H, OCH<sub>2</sub>**CH**<sub>3</sub>). C<sub>12</sub>H<sub>12</sub>O<sub>3</sub> (204.23 g mol<sup>-1</sup>). TLC:  $R_f$  (EtOAc/PE, 1:4) = 0.28. Smp = 48.8 °C.

### Ethyl (3-oxopropynyl)-benzoate derivatives 2

#### Ethyl 4-(3-oxoprop-1-yn-1-yl)benzoate (**2a**)

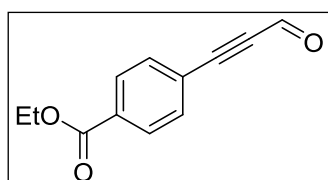

Synthesis: GP-8, reaction scale: 21.10 mmol of alcohol **1a**. Isolation by column chromatography (PE/EtOAc, 10:1).

Compound **2a** has been described by Moser, Lu, Patten, Wang, Kasar, Kaldor and Patterson [25].

Red solid, yield: 3.49 g, 17.3 mmol, 82 %.  $^1\text{H}$  NMR (600 MHz, Chloroform-*d*)  $\delta$  = 9.45 (s, 1H, CHO), 8.08 (d,  $^3J$  = 8.4 Hz, 2H, ar-2-H, ar-6-H), 7.67 (d,  $^3J$  = 8.3 Hz, 2H, ar-3-H, ar-5-H), 4.40 (q,  $^3J$  = 7.1 Hz, 2H, OCH<sub>2</sub>CH<sub>3</sub>), 1.41 (t,  $^3J$  = 7.1 Hz, 3H, OCH<sub>2</sub>CH<sub>3</sub>). C<sub>12</sub>H<sub>10</sub>O<sub>3</sub> (202.21 g mol<sup>-1</sup>). TLC: R<sub>f</sub> (EtOAc/PE, 1:1) = 0.78.

#### Ethyl 3-(3-oxoprop-1-yn-1-yl)benzoate (**2b**)

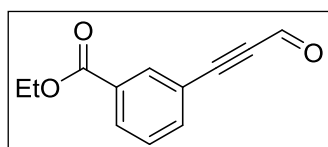

Synthesis: GP-8, reaction scale: 532  $\mu\text{mol}$  of alcohol **1b**. Isolation by column chromatography (PE/EtOAc, 10:1).

Dark red oil, yield: 91.3 mg, 452  $\mu\text{mol}$ , 85 %.  $^1\text{H}$  NMR (300 MHz, Chloroform-*d*)  $\delta$  = 9.44 (s, 1H, CHO), 8.28 (dd,  $^4J$  = 1.7 Hz,  $^4J$  = 1.4 Hz, 1H, ar-2-H), 8.16 (dd,  $^3J$  = 7.8 Hz,  $^4J$  = 1.4 Hz, 1H, ar-6-H), 7.77 (dd,  $^3J$  = 7.7 Hz,  $^4J$  = 1.4 Hz, 1H, ar-4-H), 7.50 (dd,  $^3J$  = 7.8 Hz,  $^3J$  = 7.7 Hz, 1H, ar-5-H), 4.40 (q,  $^3J$  = 7.2 Hz, 2H, OCH<sub>2</sub>CH<sub>3</sub>), 1.41 (t,  $^3J$  = 7.1 Hz, 3H, OCH<sub>2</sub>CH<sub>3</sub>). C<sub>12</sub>H<sub>10</sub>O<sub>3</sub> (202.21 g mol<sup>-1</sup>). TLC: R<sub>f</sub> (EtOAc/PE, 1:1) = 0.77.

### Ethyl (*tert*-butylsulfinyl)imino)propynyl)benzoate derivatives 3

#### Ethyl (*R,E*)-4-(3-((*tert*-butylsulfinyl)imino)prop-1-yn-1-yl)benzoate (**3a**)

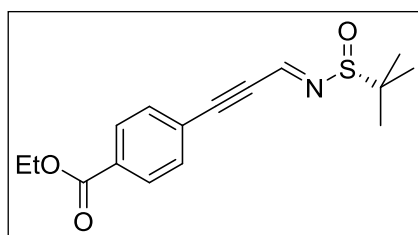

Synthesis: GP-2, reaction scale: 17.1 mmol of alcohol **2a** and 17.0 mmol of (*R*)-**1**. Isolation by column chromatography (PE/EtOAc, 4:1).

Yellow solid, yield: 1.72 g, 8.89 mmol, 52 %.  $^1\text{H}$  NMR (300 MHz, Chloroform-*d*)  $\delta$  = 8.06 (d,  $^3J$  = 8.6 Hz, 2H, ar-2-H, ar-6-H), 8.04 (s, 1H, CHN), 7.64 (d,  $^3J$  = 8.6 Hz, 2H, ar-3-H, ar-5-H), 4.39 (q,  $^3J$  = 7.1 Hz, 2H, OCH<sub>2</sub>CH<sub>3</sub>), 1.40 (t,  $^3J$  = 7.1 Hz, 3H, OCH<sub>2</sub>CH<sub>3</sub>), 1.27 (s, 9H, SC(CH<sub>3</sub>)<sub>3</sub>).  $^{13}\text{C}$  NMR (126 MHz, Chloroform-*d*)  $\delta$  = 165.8 (CO<sub>2</sub>CH<sub>2</sub>CH<sub>3</sub>), 147.9 (CHN), 132.6 (ar-C-3, ar-C-5), 131.9 (ar-C-1), 129.8 (ar-C-2, ar-C-6), 125.2 (ar-C-4), 98.9 (C <sup>$\alpha$</sup> HC≡Car), 87.4 (C <sup>$\alpha$</sup> HC≡Car), 61.6 (CO<sub>2</sub>CH<sub>2</sub>), 59.0 (SC(CH<sub>3</sub>)<sub>3</sub>), 22.7 (SC(CH<sub>3</sub>)<sub>3</sub>), 14.4 (CO<sub>2</sub>CH<sub>2</sub>CH<sub>3</sub>). C<sub>16</sub>H<sub>19</sub>NO<sub>3</sub>S (305.39 g mol<sup>-1</sup>). MS(ESI):  $m/z$  = 328.103 (328.0983 [M+Na]<sup>+</sup>), [ $\alpha$ ]<sub>589</sub><sup>22.5</sup> = -149.1 ( $c$  = 0.92; CHCl<sub>3</sub>). IR(ATR):  $\tilde{\nu}$  [cm<sup>-1</sup>] = 2980-2868 (w, NH, C-H), 1717 (CO<sub>2</sub>Et), 1220 (S=O). TLC: R<sub>f</sub> (EtOAc/PE, 1:4) = 0.38.



Ethyl (*R,E*)-3-(3-((*tert*-butylsulfinyl)imino)prop-1-yn-1-yl)benzoate (**3b**)

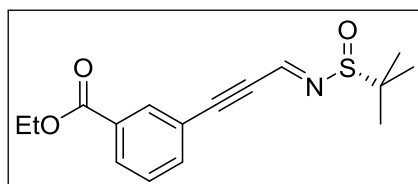

Synthesis: GP-2, reaction scale: 449  $\mu$ mol of aldehyde **2b** and 450  $\mu$ mol of (**R**)-**1**. Purification by column chromatography (PE/EtOAc, 2:1).

Red fluid liquid, yield: 110 mg, 359  $\mu$ mol, 80 %.  $^1\text{H}$  NMR (300 MHz, Chloroform-*d*)  $\delta$  = 8.24 (s, 1H, ar-2-**H**), 8.08 (d,  $^3J$  = 7.9 Hz, 1H, ar-6-**H**), 8.01 (s, 1H, **CHN**), 7.73 (d,  $^3J$  = 7.7 Hz, 1H, ar-4-**H**), 7.45 (dd,  $^3J$  = 7.8 Hz,  $^3J$  = 7.8 Hz, 1H, ar-5-**H**), 4.37 (q,  $^3J$  = 7.1 Hz, 2H,  $\text{OCH}_2\text{CH}_3$ ), 1.38 (t,  $^3J$  = 7.1 Hz, 3H,  $\text{OCH}_2\text{CH}_3$ ), 1.25 (s, 9H,  $\text{SC}(\text{CH}_3)_3$ ).  $\text{C}_{16}\text{H}_{19}\text{NO}_3\text{S}$  (305.39 g  $\text{mol}^{-1}$ ).

#### Ethyl benzoate substituted propargylamine derivatives 4

Ethyl 4-(3-((*tert*-butylsulfinyl)amido)but-1-yn-1-yl)benzoate (**4a**)

Methylolithium (1.6 M in  $\text{Et}_2\text{O}$ , 3.0 mL, 2.1 g, 2.6 mmol, 3.5 equiv) or  $\text{MeMgBr}$  (3 M in  $\text{Et}_2\text{O}$ , 0.5 mL, 0.4 g, 1.4 mmol, 1.4 equiv) was added dropwise to a deeply purple solution of imine **3a** (210 mg, 0.69 mmol, 1.0 equiv) and  $\text{AlMe}_3$  (25 % in *n*-hexane, 0.82 mL, 0.56 g, 1.9 mmol) at  $-70^\circ\text{C}$ . The reaction mixture was stirred for 4.5 h at  $-30^\circ\text{C}$  to  $-40^\circ\text{C}$ . Then,  $\text{EtOH}$  (15 mL) was added and the crude mixture washed with an aqueous  $\text{NH}_4\text{Cl}$  solution. The aqueous layer was extracted with  $\text{Et}_2\text{O}$  ( $3 \times 20$  mL) and the combined organic layers were washed with brine and dried over  $\text{Na}_2\text{SO}_4$ . After evaporation of the solvent, the crude product was purified by preparative HPLC to yield racemic propargylamine in form of a yellow solid.

Yellow solid, yield (nucleophile =  $\text{MeLi}$ ): 8.6 mg, 4 %, *dr* = 52:48. Yield (nucleophile =  $\text{MeMgBr}$ ): 14.5 mg, 10 %, *dr* = 51:49.

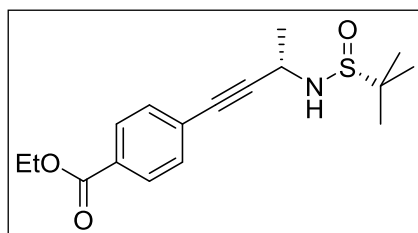

Ethyl 4-((*S*)-3-(((*R*)-*tert*-butylsulfinyl)amido)but-1-yn-1-yl)benzoate:  $^1\text{H}$  NMR (600 MHz, Chloroform-*d*)  $\delta$  = 7.96 (d,  $^3J$  = 8.5 Hz, 2H, ar-2-**H**, ar-6-**H**), 7.68 (d,  $^3J$  = 8.6 Hz, 1H, ar-3-**H**, ar-5-**H**), 4.48 (q,  $^3J$  = 6.8 Hz, 1H,  $\text{C}^{\alpha}\text{H}$ ), 4.37 (q,  $^3J$  = 7.1 Hz, 2H,  $\text{OCH}_2\text{CH}_3$ ), 1.60 (dd,  $^3J$  = 6.8 Hz,  $^4J$  = 1.0 Hz, 3H,  $\text{C}^{\alpha}\text{HCH}_3$ ), 1.39 (t,  $^3J$  = 7.2 Hz, 3H,  $\text{OCH}_2\text{CH}_3$ ), 1.25 (s, 9H,  $\text{SC}(\text{CH}_3)_3$ ).  $^{13}\text{C}$  NMR (151 MHz, Chloroform-*d*)  $\delta$  = 166.2 ( $\text{CO}_2\text{Et}$ ), 132.8 (ar-**C**-3, ar-**C**-5), 131.7 (ar-**C**-1), 129.5

(ar-C-2, ar-C-6), 128.5 (ar-C-4), 92.5 ( $C^{\alpha}C\equiv Car$ ), 83.5 ( $C^{\alpha}C\equiv Car$ ), 61.3 ( $OCH_2CH_3$ ), 56.2 ( $SCMe_3$ ), 44.2 ( $C^{\alpha}$ ), 24.0 ( $C^{\alpha}CH_3$ ), 22.6 ( $SC(CH_3)_3$ ), 14.4 ( $OCH_2CH_3$ ).  $C_{17}H_{23}NO_3S$  (321.44 g mol<sup>-1</sup>). MS(ESI):  $m/z$  = 322.25 (322.44  $[M+H]^+$ ). IR(ATR):  $\tilde{\nu}$  [cm<sup>-1</sup>] = 3268- 3195 (NH), 2980- 2866 (CH), 1714 ( $CO_2Et$ ), 1290 (S=O).

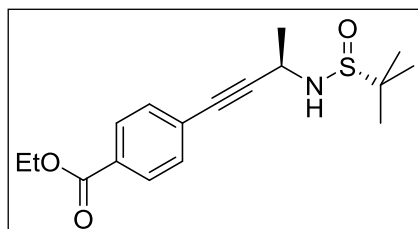

Ethyl 4-((*R*)-3-(((*R*)-*tert*-butylsulfinyl)amido)but-1-yn-1-yl)benzoate: <sup>1</sup>H NMR (600 MHz, Chloroform-*d*)  $\delta$  = 7.96 (d, <sup>3</sup>*J* = 8.3 Hz, 2H, ar-2-**H**, ar-6-**H**), 7.48 (d, <sup>3</sup>*J* = 8.5 Hz, 2H, ar-3-**H**, ar-5-**H**), 4.41 (q, <sup>3</sup>*J* = 6.6 Hz, 1H,  $C^{\alpha}H$ ), 4.37 (q, <sup>3</sup>*J* = 7.1 Hz, 3H,  $OCH_2CH_3$ ), 1.55 (d, <sup>3</sup>*J* = 6.5 Hz, 3H,  $C^{\alpha}HCH_3$ ), 1.39 (t, <sup>3</sup>*J* = 7.2 Hz, 3H,  $OCH_2CH_3$ ), 1.24 (s, 9H,  $SC(CH_3)_3$ ). <sup>13</sup>C NMR (151 MHz, Chloroform-*d*)  $\delta$  = 147.6 ( $CO_2Et$ ), 131.8 (ar-C-3, ar-C-5), 130.2 (ar-C-1), 129.5 (ar-C-2, ar-C-6), 127.4 (ar-C-4), 92.8 ( $C^{\alpha}C\equiv Car$ ), 87.8 ( $C^{\alpha}C\equiv Car$ ), 58.8 ( $OCH_2CH_3$ ), 56.2 ( $SC(CH_3)_3$ ), 43.6 ( $C^{\alpha}$ ), 26.9 ( $C^{\alpha}HCH_3$ ), 22.7 ( $SC(CH_3)_3$ ), 14.4 ( $OCH_2CH_3$ ).  $C_{17}H_{23}NO_3S$  (321.44 g mol<sup>-1</sup>). MS(ESI)  $m/z$  = 322.25 (322.44  $[M+H]^+$ ). IR(ATR):  $\tilde{\nu}$  [cm<sup>-1</sup>] = 3268- 3195 (NH), 2980- 2866 (CH), 1714 ( $CO_2Et$ ), 1290 (SO).

#### Ethyl 3-((*R*)-3-(((*R*)-*tert*-butylsulfinyl)amido)-4-methylpent-1-yn-1-yl)benzoate (**4b**)

Isopropylmagnesium bromide (2 M in THF, 4 equiv) was added dropwise to a solution of imine **3b** and  $Ti(OiPr)_4$  in THF at -78 °C. The reaction progress was monitored by analytical HPLC. After complete consumption of the starting material, the reaction was quenched by the addition of a saturated  $NH_4Cl$  solution.  $Et_2O$  was added, the layers separated and the organic layer was washed with a  $KHSO_4$  (5%) solution. The aqueous layers were extracted with  $Et_2O$  and the combined organic layers were dried over  $Na_2SO_4$ . The solvent was evaporated in vacuo and the crude product purified by preparative HPLC.

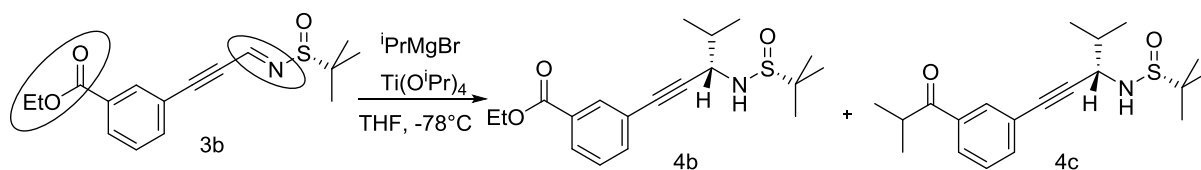

The relation of **4b/4c** was 6:4. In **4c**, ester and imine were both substituted. So, the chemoselectivity of imine/ester was 71:29.

Ethyl 3-((*R*)-3-(((*R*)-*tert*-butylsulfinyl)amido)-4-methylpent-1-yn-1-yl)benzoate (**4b**):

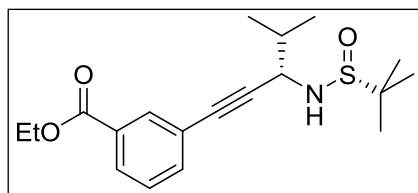

Yellow oil, yield: 8.0 mg, 23  $\mu$ mol, 13 %, *dr* = 99:1.  $^1\text{H}$  NMR (600 MHz, Chloroform-*d*)  $\delta$  = 8.08 (dd,  $^4J$  = 1.5 Hz,  $^4J$  = 1.4 Hz, 1H, ar-2-**H**), 7.98 (ddd,  $^3J$  = 7.9 Hz,  $^4J$  = 1.5 Hz,  $^4J$  = 1.4 Hz, 1H, ar-6-**H**), 7.60 (ddd,  $^3J$  = 7.7 Hz,  $^4J$  = 1.4 Hz,  $^4J$  = 1.4 Hz, 1H, ar-4-**H**), 7.39 (td,  $^3J$  = 7.8 Hz,  $^3J$  = 7.8 Hz,  $^4J$  = 0.6 Hz, 1H, ar-5-**H**), 4.39 (q,  $^3J$  = 7.2 Hz, 2H,  $\text{OCH}_2\text{CH}_3$ ), 4.25 (t,  $^3J$  = 4.2 Hz, 1H,  $\text{C}^{\alpha}\text{H}$ ), 3.39 (m, 1H,  $\text{C}^{\alpha}\text{HNH}$ ), 2.05 (pd,  $^3J$  = 6.7 Hz,  $^3J$  = 4.9 Hz, 1H,  $\text{C}^{\alpha}\text{CH}(\text{CH}_3)_2$ ), 1.40 (t,  $^3J$  = 7.1 Hz, 3H,  $\text{OCH}_2\text{CH}_3$ ), 1.26 (s, 9H,  $\text{SC}(\text{CH}_3)_3$ ), 1.10 (d,  $^3J$  = 6.7 Hz, 3H,  $\text{C}^{\alpha}\text{HCHCH}_3$ ), 1.09 (d,  $^3J$  = 6.7 Hz, 3H,  $\text{C}^{\alpha}\text{HCHCH}_3$ ).  $^{13}\text{C}$  NMR (126 MHz, Chloroform-*d*)  $\delta$  = 166.1 ( $\text{CO}_2\text{CH}_2\text{CH}_3$ ), 136.0 (ar-C-2), 132.9 (ar-C-6), 130.9 (ar-C-1), 129.4 (ar-C-4), 128.5 (ar-C-5), 123.3 (ar-C-3), 87.7 ( $\text{C}^{\alpha}\text{C}\equiv\text{C}$ -ar), 85.2 ( $\text{C}^{\alpha}\text{C}\equiv\text{C}$ -ar), 61.4 ( $\text{OCH}_2\text{CH}_3$ ), 56.3 ( $\text{SC}(\text{CH}_3)_3$ ), 54.7 ( $\text{C}^{\alpha}$ ), 34.4 ( $\text{C}^{\alpha}\text{CH}(\text{CH}_3)_2$ ), 22.7 ( $\text{SC}(\text{CH}_3)_3$ ), 19.6 ( $\text{CH}_3\text{CHCH}_3$ ), 17.4 ( $\text{CH}_3\text{CHCH}_3$ ), 14.5 ( $\text{OCH}_2\text{CH}_3$ ).  $\text{C}_{19}\text{H}_{27}\text{NO}_3\text{S}$  (349.49  $\text{g mol}^{-1}$ ). MS(ESI):  $m/z$  = 372.3 (372.16  $[\text{M}+\text{Na}]^+$ ).  $[\alpha]_{589}^{23} = 27.7$  ( $c$  = 0.4;  $\text{CHCl}_3$ ). IR(ATR):  $\tilde{\nu}$  [ $\text{cm}^{-1}$ ] = 3255 (NH), 2961- 2872 (C-H), 1717 ( $\text{CO}_2\text{Et}$ ), 1292 (S=O).

Side-product:

(*R*)-*N*-((*S*)-1-(3-isobutyrylphenyl)-4-methylpent-1-yn-3-yl)-*tert*-butylsulfinamide (**4c**):

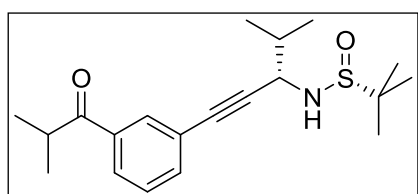

Yellow oil, yield: 5.5 mg, 16  $\mu$ mol, 9 %.  $^1\text{H}$  NMR (600 MHz, Chloroform-*d*)  $\delta$  = 8.07 (dd,  $^4J$  = 1.4 Hz,  $^4J$  = 1.4 Hz, 1H, ar-2-**H**), 7.97 (dd,  $^3J$  = 7.9 Hz,  $^4J$  = 1.4 Hz, 1H, ar-6-**H**), 7.59 (dd,  $^3J$  = 7.7 Hz,  $^4J$  = 1.4 Hz, 1H, ar-4-**H**), 7.38 (dd,  $^3J$  = 8.2 Hz,  $^3J$  = 7.2 Hz, 1H, ar-5-**H**), 5.26 (sept,  $^3J$  = 6.3 Hz, 1H,  $\text{COCH}(\text{CH}_3)_2$ ), 4.38 (m, 1H,  $\text{C}^{\alpha}\text{H}$ ), 4.25 (d,  $^3J$  = 4.2 Hz, 1H,  $\text{C}^{\alpha}\text{HNH}$ ), 2.05 (m, 1H,  $\text{C}^{\alpha}\text{CH}(\text{CH}_3)_2$ ), 1.38 (d,  $^3J$  = 6.2 Hz, 3H,  $\text{COCH}(\text{CH}_3)_2$ ), 1.36 (d,  $^3J$  = 6.2 Hz, 3H,  $\text{COCH}(\text{CH}_3)_2$ ), 1.27 (s, 9H,  $\text{SC}(\text{CH}_3)_3$ ), 1.10 (d,  $^3J$  = 6.6 Hz, 3H,  $\text{C}^{\alpha}\text{HCHCH}_3$ ), 1.09 (d,  $^3J$  = 6.7 Hz, 3H,  $\text{C}^{\alpha}\text{HCHCH}_3$ ).  $\text{C}_{20}\text{H}_{29}\text{NO}_2\text{S}$  (347.52  $\text{g mol}^{-1}$ ). MS(ESI):  $m/z$  = 348.41 (348.20  $[\text{M}+\text{H}]^+$ ). IR(ATR):  $\tilde{\nu}$  [ $\text{cm}^{-1}$ ] = 3395- 3275 (NH), 2962- 2870 (C-H), 1673 ( $\text{CO}^i\text{Pr}$ ), 1201 (SO).

## Chiral aldimines **5**

### (*S,E*)-*N*-Ethylidene-2-*tert*-butylsulfinamide (**5a**)

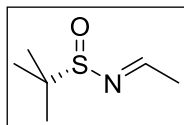

Synthesis: GP-1, reaction scale: 16.4 mmol of sulfinamide (**S**)-**1**. In contrast to other imine condensations, five equivalents of the acetaldehyde are necessary due to its low boiling point. The Lewis acid  $\text{Ti}(\text{OEt})_4$  was replaced by  $\text{MgSO}_4$  (5 equiv) and the reaction was carried out at 30 °C overnight. Purification by column chromatography (PE/EtOAc, 4:1 or  $\text{Et}_2\text{O}$ ). Compound **5a** has been first described by Ferreira, Audouin and Chemla [26].

Colourless, viscous oil, yield: 1.95 g, 13.3 mmol, 81 %.  $^1\text{H}$  NMR (500 MHz, Chloroform-*d*)  $\delta$  = 8.08 (q,  $^3J$  = 5.1 Hz, 1H, CHN), 2.23 (d,  $^3J$  = 5.1 Hz, 3H, CNCH<sub>3</sub>), 1.19 (s, 9H, C(CH<sub>3</sub>)<sub>3</sub>).  $^{13}\text{C}$  NMR (126 MHz, Chloroform-*d*)  $\delta$  = 166.1 (CHN), 56.7 (CMe<sub>3</sub>), 22.5 (C(CH<sub>3</sub>)<sub>3</sub>). C<sub>6</sub>H<sub>13</sub>NOS (147.24 g mol<sup>-1</sup>). MS(ESI):  $m/z$  = 170.0 (170.06 [M+Na]<sup>+</sup>). TLC:  $R_f$  (PE/EtOAc, 4:1) = 0.3.

### (*S,E*)-*N*-(2-Methylpropylidene)-*tert*-butylsulfinamide (**5b**)

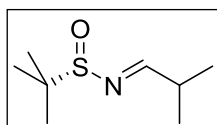

Synthesis: GP-1, reaction scale: 1.7 mmol of sulfinamide (**S**)-**1**. In contrast to other imine condensations, two equivalents of the isobutyraldehyde are necessary due to its low boiling point. Imine **5b** was achieved in pure form and not further purified. Compound **5b** was first described by Tang and Ellman [27].

Yellow viscous oil, yield: 0.27 g, 1.5 mmol, 90 %.  $^1\text{H}$  NMR (600 MHz, Chloroform-*d*):  $\delta$  = 7.98 ppm (d,  $^3J$  = 4.4 Hz, 1H, CHN), 2.71 (m, 1H, CH(CH<sub>3</sub>)<sub>2</sub>), 1.18 (s, 9H, C(CH<sub>3</sub>)<sub>3</sub>), 1.17 (d,  $^3J$  = 6.9 Hz, 3H, CH(CH<sub>3</sub>)<sub>2</sub>), 1.16 (d,  $^3J$  = 6.8 Hz, 3H, CH(CH<sub>3</sub>)<sub>2</sub>).  $^{13}\text{C}$  NMR (126 MHz, Chloroform-*d*)  $\delta$  = 173.7 (C=N), 56.6 (SC(CH<sub>3</sub>)<sub>3</sub>), 35.0 (CH(CH<sub>3</sub>)<sub>2</sub>), 22.4 (SC(CH<sub>3</sub>)<sub>3</sub>), 19.0 ((CH<sub>3</sub>)HC(CH<sub>3</sub>)), 19.0 ((CH<sub>3</sub>)HC(CH<sub>3</sub>)). C<sub>8</sub>H<sub>17</sub>NOS (175.29 g mol<sup>-1</sup>).  $[\alpha]_{589}^{20}$  = 230.2 ( $c$  = 2.28; CHCl<sub>3</sub>). TLC:  $R_f$  (PE/EtOAc, 2:1) = 0.28.

### (*S,E*)-*N*-(3-Methylbutylidene)-*tert*-butylsulfinamide (**5c**)

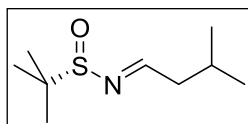

Synthesis: GP-1, reaction scale: 8.36 mmol of sulfinamide (**S**)-**1** and 10.0 mmol of isovaleraldehyde. No further purification of the crude

product was necessary. Compound **5c** was first described by Staas, Savage, Homnick, Tsou and Ball [28], as well as Ye, He and Zhang [29].

Colourless, viscous oil, yield: 1.46 g, 7.69 mmol, 92 %.  $^1\text{H}$  NMR (300 MHz, Chloroform-*d*):  $\delta$  = 8.02 (t,  $^3J$  = 5.2 Hz, 1H, CHN), 2.43-2.36 (m, 2H, CNCH<sub>2</sub>), 2.03 (m, 1H, (H<sub>3</sub>C)<sub>2</sub>CH), 1.17 (s, 9H, S(C(CH<sub>3</sub>)<sub>3</sub>), 0.98 (d,  $^3J$  = 6.9 Hz, 3H, (CH<sub>3</sub>)HC(CH<sub>3</sub>)), 0.95 (d,  $^3J$  = 7.3 Hz, 3H, (CH<sub>3</sub>)CH(CH<sub>3</sub>)). C<sub>9</sub>H<sub>19</sub>NOS (189.32 g mol<sup>-1</sup>).  $[\alpha]_{589}^{20}$  = 276.3 (*c* = 2.09; CHCl<sub>3</sub>). TLC: *R*<sub>f</sub> (PE/EtOAc, 2:1) = 0.67.

(*S,E*)-*N*-(Cyclohexylmethylene)-*tert*-butylsulfonamide (**5d**)

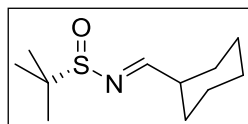

Synthesis: GP-2, reaction scale: 12.66 mmol of sulfonamide (**S**)-**1** and 13.9 mmol of cyclohexanecarbaldehyde. Isolation by column chromatography (PE/EtOAc, 4:1). Compound **5d** has been first described by Prakash, Mandal and Olah [30].

Colourless crystalline solid, yield: 2.616 g, 12.15 mmol 96 %.  $^1\text{H}$  NMR (300 MHz, Chloroform-*d*)  $\delta$  = 7.91 (d,  $^3J$  = 4.5 Hz, 1H, CHN), 2.41 (m, 1H, cy-1-H), 1.83 (ddd,  $^2J$  = 9.6 Hz,  $^3J$  = 4.7 Hz,  $^3J$  = 4.2 Hz, 2H, cy-2-H, cy-6-H), 1.78-1.69 (m, 2H, cy-3-H, cy-5-H), 1.62 (m, 1H, cy-4-H), 1.37-1.17 (m, 5H, cy-5-H, cy-3-H, cy-4-H, cy-6-H, cy-2-H), 1.13 (s, 9H, C(CH<sub>3</sub>)<sub>3</sub>).  $^{13}\text{C}$  NMR (75 MHz, Chloroform-*d*)  $\delta$  = 172.7 (CHN), 56.5 (C(CH<sub>3</sub>)<sub>3</sub>), 44.1 (cy-C-1), 29.4 (cy-C-2, cy-C-6), 25.9 (cy-C-4), 25.4 (cy-C-3), 25.4 (cy-C-5), 22.4 (C(CH<sub>3</sub>)<sub>3</sub>). C<sub>11</sub>H<sub>21</sub>NOS (215.36 g mol<sup>-1</sup>). MS(EI): *m/z* = 238.0 (238.12 [M+Na]<sup>+</sup>). IR(ATR):  $\tilde{\nu}$ [cm<sup>-1</sup>] = 2924 (C-H), 2851 (C-H), 1613 (CN), 1606 (SO), 1451, 1359, 1185, 1076 (SC), 967, 584.

(*S,E*)-*N*-(2,2-Dimethylpropylidene)-*tert*-butylsulfonamide (**5e**)

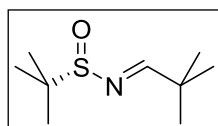

Synthesis: GP-2, reaction scale: 36.5 mmol of sulfonamide (**S**)-**1** and 36.5 mmol of pivalaldehyde. Reaction was monitored by TLC. Reaction time was increased to 7 d, due to the low reactivity of *tert*-butanal. Purification by column chromatography (EtOAc/PE, 1:4). Compound **5e** has been first described by Liu, Cogan, Owens, Tang and Ellman [3].

Colourless oil, yield: 1.245 g, 6.575 mmol, 18 %.  $^1\text{H}$  NMR (500 MHz, Chloroform-*d*)  $\delta$  = 7.87 (s, 1H, CHN), 1.13 (s, 9H, SC(CH<sub>3</sub>)<sub>3</sub>), 1.10 (s, 9H, C<sup>a</sup>C(CH<sub>3</sub>)<sub>3</sub>).  $^{13}\text{C}$  NMR (126 MHz,

Chloroform-*d*)  $\delta$  = 175.7 (CHN), 56.6 (SC(CH<sub>3</sub>)<sub>3</sub>), 38.0 (C <sup>$\alpha$</sup> C(CH<sub>3</sub>)<sub>3</sub>), 26.7 (C <sup>$\alpha$</sup> C(CH<sub>3</sub>)<sub>3</sub>), 22.4 (SC(CH<sub>3</sub>)<sub>3</sub>). C<sub>9</sub>H<sub>19</sub>NOS (189.32 g mol<sup>-1</sup>), MS(ESI): 190.1264 (190.12601 [M+H]<sup>+</sup>). TLC: R<sub>f</sub> (PE/EtOAc, 4:1) = 0.63.

*(S)*-*N*-((*E*)-((3*S*,5*S*,7*S*)-Adamantan-1-yl)methylene)-*tert*-butylsulfonamide (**5f**)

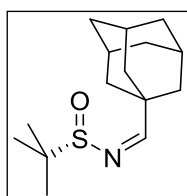

Synthesis: GP-2, reaction scale: 4.20 mmol of sulfonamide (**S**)-**1** and 4.06 mmol of adamantyl-1-carbaldehyde. Purification by column chromatography (PE/EtOAc, 4:1).

Colourless crystalline solid, yield: 456 mg, 1.70 mmol, 42 %. <sup>1</sup>H NMR (500 MHz, Chloroform-*d*)  $\delta$  = 7.64 (s, 1H, CHN), 1.90 (d, <sup>2</sup>*J* = 25.1 Hz, 3H, CNC(CH<sub>2</sub>CHCH<sub>2</sub>)<sub>3</sub>), 1.64 (d, <sup>2</sup>*J* = 15.1 Hz, 13H, CNC(CH<sub>2</sub>CHCH<sub>2</sub>)<sub>3</sub>), 1.57 (d, <sup>2</sup>*J* = 11.8 Hz, 3H, CNC(CH<sub>2</sub>CHCH<sub>2</sub>)<sub>3</sub>), 1.04 (s, 9H, SC(CH<sub>3</sub>)<sub>3</sub>). <sup>13</sup>C NMR (126 MHz, Chloroform-*d*)  $\delta$  = 174.9 (CHN), 56.2 (SC(CH<sub>3</sub>)<sub>3</sub>), 39.9 (CNC(CH<sub>2</sub>CHCH<sub>2</sub>)<sub>3</sub>), 39.0 (CNC(CH<sub>2</sub>CHCH<sub>2</sub>)<sub>3</sub>), 36.4 (C <sup>$\alpha$</sup> C(CH<sub>2</sub>CHCH<sub>2</sub>)<sub>3</sub>), 27.7 (C <sup>$\alpha$</sup> C(CH<sub>2</sub>CHCH<sub>2</sub>)<sub>3</sub>), 22.1 (SC(CH<sub>3</sub>)<sub>3</sub>). C<sub>15</sub>H<sub>25</sub>NOS (267.43 g mol<sup>-1</sup>), MS(ESI): *m/z* = 268.1733 (268.1730 [M+H]<sup>+</sup>). TLC: R<sub>f</sub> (PE/EtOAc, 10:1) = 0.24.

*(R,E)*-*N*-(3-(Methylthio)propylidene)-*tert*-butylsulfonamide (**5g**)

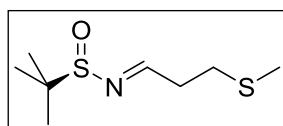

Synthesis: GP-2, reaction scale: 36.5 mmol of sulfonamide (**R**)-**1** and 19.85 mmol of 3-(methylthio)propanal. The crude product was purified by column chromatography (EtOAc/PE, 1:4). Compound **5g**

has been first described by Gross, Heuser, Ammer, Heckmann and Bach [31] and Yao and Yuan [32].

Slightly yellow oil, yield: 3.663 g, 17.67 mmol, 89 %, <sup>1</sup>H NMR (300 MHz, Chloroform-*d*)  $\delta$  = 8.03 (t, <sup>3</sup>*J* = 3.4 Hz, 1H, CHN), 2.80-2.73 (m, 4H, SCH<sub>2</sub>CH<sub>2</sub>), 2.07 (s, 3H, SCH<sub>3</sub>), 1.15 (s, 9H, SC(CH<sub>3</sub>)<sub>3</sub>). <sup>13</sup>C NMR (75 MHz, Chloroform-*d*)  $\delta$  = 167.5 (CHN), 56.9 (SC(CH<sub>3</sub>)<sub>3</sub>), 35.7 (CNCH<sub>2</sub>), 29.6 (CH<sub>2</sub>SCH<sub>3</sub>), 22.4 (SC(CH<sub>3</sub>)<sub>3</sub>), 15.7 (SCH<sub>3</sub>). C<sub>8</sub>H<sub>17</sub>NOS<sub>2</sub> (207.35 g mol<sup>-1</sup>).

(*S*)-*N*-(2-Phenylethylidene)-*tert*-butylsulfonamide (**5h**)

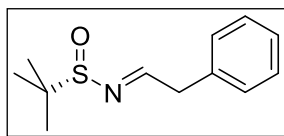

Synthesis: GP-2, reaction scale: 4.16 mmol of sulfonamide (**S**)-**1** and 5.40 mmol of phenylacetaldehyde. Purification of **5h** by column chromatography (DCM). Compound **5h** has been first described by Liu, Cogan, Owens, Tang and Ellman [3].

Yellow oil, yield: 593 mg, 2.66 mmol, 64 %.  $^1\text{H}$  NMR (500 MHz, Chloroform-*d*):  $\delta$  = 8.13 (t,  $^3J$  = 5.2 Hz, 1H, CHN), 7.31 (m, 2H, ar-2-H, ar-6-H), 7.28-7.20 (m, 3H, ar-3-H, ar-4-H, ar-5-H), 3.85 (dd,  $^2J$  = 15.1 Hz,  $^3J$  = 5.2 Hz, 1H, CNCH<sub>2</sub>), 3.80 (dd,  $^2J$  = 15.1 Hz,  $^3J$  = 5.2 Hz, 1H, CNCH<sub>2</sub>), 1.18 (s, 9H, SC(CH<sub>3</sub>)<sub>3</sub>). C<sub>12</sub>H<sub>17</sub>NOS (223.33 g mol<sup>-1</sup>). TLC: R<sub>f</sub> (DCM) = 0.28.  $[\alpha]_{589}^{20}$  = 271.0 (*c* = 1.0; CHCl<sub>3</sub>).

(*S*)-*N*-(Benzylidene)-*tert*-butylsulfonamide (**5i**)

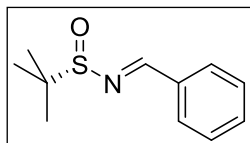

Synthesis: GP-1, reaction scale: 8.31 mmol of sulfonamide (**S**)-**1** and 12.5 mmol of benzaldehyde. The crude product was obtained in pure form. No further purification was necessary for the further conversions. Compound **5i** was first described by Ruano, Fernández, Catalina and Cruz [33].

Yellow oil, yield: 1.72 g, 8.23 mmol, 99 %.  $^1\text{H}$  NMR (500 MHz, Chloroform-*d*):  $\delta$  = 8.59 (s, 1H, N=CH), 7.86-7.85 (m, 2H, ar-2-H, ar-6-H), 7.54-7.46 (m, 3H, ar-3-H, ar-4-H, ar-5-H), 1.27 (s, 9H, SC(CH<sub>3</sub>)<sub>3</sub>). C<sub>11</sub>H<sub>15</sub>NOS (209.31 g mol<sup>-1</sup>).  $[\alpha]_{589}^{20}$  = 124.4 (*c* = 1.0; CHCl<sub>3</sub>).

(*S,Z*)-*N*-((Pentafluorophenyl)methylene)-*tert*-butylsulfonamide (**5j**)

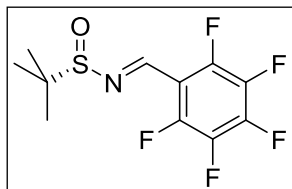

Synthesis: GP-2, reaction scale: 9.0 mmol of sulfonamide (**S**)-**1** and 9.0 mmol of pentafluorobenzaldehyde. Compound **5j** was purified by column chromatography (PE/EtOAc, 4:1).

Colourless highly viscous oil, yield: 2.37 g, 7.92 mmol, 88 %.  $^1\text{H}$  NMR (300 MHz, Chloroform-*d*)  $\delta$  = 8.72 (s, 1H, CHN), 1.28 (s, 9H, SC(CH<sub>3</sub>)<sub>3</sub>).  $^{19}\text{F}$  NMR (282 MHz, Chloroform-*d*)  $\delta$  = -139.9 (dt,  $^3J_{\text{FF}}$  = 19.0 Hz,  $^4J_{\text{FF}}$  = 6.3 Hz, 2F, ar-2-F, ar-6-F), -147.2 (tt,  $^3J$  = 20.8 Hz,  $^4J_{\text{FF}}$  = 4.9 Hz, ar-4-F), -160.8 (dd,  $^3J$  = 20.7 Hz,  $^3J_{\text{FF}}$  = 12.7 Hz, ar-3-F, ar-5-F).  $^{13}\text{C}$  NMR (126 MHz, Chloroform-*d*)  $\delta$  = 151.4 (d,  $^3J_{\text{CF}}$  = 2.7 Hz, CHN), 146.4 (d,  $^1J_{\text{CF}}$  =

260.9 Hz, ar-C-3, ar-C-5), 143.6 (d,  $^1J_{CF} = 261.2$  Hz, ar-C-4), 138.0 (d,  $^1J_{CF} = 255.2$  Hz, ar-C-2, ar-C-6), 109.7 (dd,  $^2J_{CF} = 11.0$  Hz,  $^3J = 7.0$  Hz, ar-C-1), 58.7 (C(CH<sub>3</sub>)<sub>3</sub>), 22.7 (SC(CH<sub>3</sub>)<sub>3</sub>). C<sub>11</sub>H<sub>10</sub>F<sub>5</sub>NOS (299.26 g mol<sup>-1</sup>). ESI:  $m/z = 322.0306$  (322.0301 [M+Na]<sup>+</sup>). TLC: R<sub>f</sub>(PE/EtOAc, 6:1) = 0.56.

*(S,E)*-*N*-(2,2,2-Trifluoroethylidene)-*tert*-butylsulfonamide (**5k**)

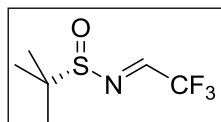

The preparation of 2,2,2-trifluoroacetaldehyde was carried out as described in the dissertation of Gerhard Greier [34]: Fluoral hydrate (75 %, 55.9 mmol) was placed under argon atmosphere in a closed vessel, which is linked by a Claisen condenser to a vessel with molecular sieves (3 Å), cooled to -78 °C. Concentrated sulfuric acid (10 mL) was added dropwise to the fluoral hydrate (6 mL) via dropping funnel and the solution was heated to 70 °C. The developing 2,2,2-trifluoroacetaldehyde was condensed in the cooled flask, where its mass was determined (2.08 g, 21.2 mmol).

To the condensed 2,2,2-trifluoroacetaldehyde, an equimolar amount of (*S*)-*tert*-butyl sulfonamide (**S**)-**1** (2.57 g, 21.2 mmol) was added in one portion. The mixture was diluted with dry toluene (20 mL) and stirred for 48 h at rt. The suspension was filtered under argon atmosphere through a frit and the solution of imine **5k** was stored under argon atmosphere for subsequent reactions.

Imine **5k** is formed as intermediate without isolation, as first described by Truong, Menard and Dion [35].

*(S,Z)*-*N*-(2,2,2-Trichloroethylidene)-*tert*-butylsulfonamide (**5l**)

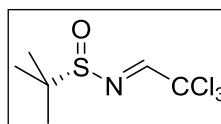

Chloral hydrate was converted to the aldehyde, chloral, following the description of Ullman's Encyclopedia of Industrial Chemistry [36]: Chloral hydrate (5.00 g, 30.25 mmol, 1 equiv) was placed in a two neck flask with a column, filled with CaCl<sub>2</sub> and which is attached to a Claisen condenser, leading to another flask, cooled to -78 °C. P<sub>2</sub>O<sub>5</sub> (4.29 g, 15.1 mmol, 0.5 equiv) was added to the chloral hydrate in one portion through the second neck. The mixture was melted at 80 °C and then heated up to 120 °C. The developing gas was lead through the CaCl<sub>2</sub> and distilled (T =



approximately 100 °C) into the precooled flask, where the chloral was quantified (4.46 g, 30.25 mmol). Molecular sieves (4 Å, 15 g) and an equimolar amount of Ellman's chiral sulfinamide (**S**)-**1** (3.65 g, 30.0 mmol) was added and the reaction mixture was suspended in toluene (30 mL). After full conversion (7 d, monitored by TLC), the solid components were filtered through a pad of silica gel (PE/EtOAc, 10:1) and the solvent was evaporated under reduced pressure to yield imine **5l** in pure form.

Slightly yellow oil, yield: 6.56 g, 26.2 mmol, 87 %. <sup>1</sup>H NMR (500 MHz, Chloroform-*d*) δ = 7.98 (s, 1H, CHN), 1.25 (s, 9H, SC(CH<sub>3</sub>)<sub>3</sub>). <sup>13</sup>C NMR (126 MHz, Chloroform-*d*) δ = 159.6 (CHN), 93.0 (Cl<sub>3</sub>C), 59.3 (SC(CH<sub>3</sub>)<sub>3</sub>), 22.6 (SC(CH<sub>3</sub>)<sub>3</sub>). C<sub>6</sub>H<sub>10</sub>Cl<sub>3</sub>NOS (250.56 g mol<sup>-1</sup>). TLC: R<sub>f</sub> (PE/EtOAc, 4:1) = 0.72.

*(S,E)*-*N*-(2-(Trityloxy)ethylidene)-*tert*-butylsulfinamide (**5m**)

2-(Trityloxy)ethane-1-ol

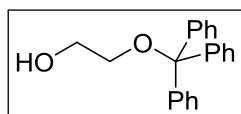

A solution of tritylchloride (5.01 g, 18.0 mmol, 1 equiv) in DCM (20 mL) was added dropwise to a solution of ethane-1,2-diol (3.02 mL, 54.0 mmol, 3 equiv), DMAP (0.22 mL, 1.8 mmol, 0.1 equiv) and Et<sub>3</sub>N (5.05 mL, 18.0 mmol, 1 equiv) in DCM (120 mL). The reaction mixture was stirred for 48 h at rt. Then, H<sub>2</sub>O (100 mL) was added. The phases were separated and the aqueous layer was extracted with DCM (2 × 100 mL). The combined organic layers were washed with brine, dried over Na<sub>2</sub>SO<sub>4</sub> and the solvent was evaporated under reduced pressure. The crude product was purified by column chromatography (PE/EtOAc, 4:1).

Colourless crystalline solid, yield: 4.73 g, 15.5 mmol, 86 %. <sup>1</sup>H NMR (500 MHz, Chloroform-*d*) δ = 7.45 (d, <sup>3</sup>J = 7.2 Hz, 6H, ar-2-**H**, ar-6-**H**), 7.31 (t, <sup>3</sup>J = 7.5 Hz, 6H, ar-3-**H**, ar-5-**H**), 7.25 (t, <sup>3</sup>J = 6.7 Hz, 3H, ar-4-**H**), 3.78-3.72 (m, 2H, CH<sub>2</sub>CH<sub>2</sub>OH), 3.27 (t, <sup>3</sup>J = 4.8 Hz, 2H, OCH<sub>2</sub>), 1.93 (t, <sup>3</sup>J = 6.2 Hz, 1H, -OH). <sup>13</sup>C NMR (126 MHz, Chloroform-*d*) δ = 143.9 (ar-C-1), 128.7 (ar-C-2, ar-C-6), 127.9 (ar-C-3, ar-C-5), 127.1 (ar-C-4), 86.7 (Ph<sub>3</sub>C), 64.8 (Ph<sub>3</sub>COCH<sub>2</sub>), 62.4 (CH<sub>2</sub>OH). C<sub>21</sub>H<sub>20</sub>O<sub>2</sub> (304.39 g mol<sup>-1</sup>), MS(ESI): *m/z* = 327.2 (327.14 [M+Na]<sup>+</sup>). IR(ATR):  $\tilde{\nu}$  [cm<sup>-1</sup>] = 3383 (OH), 3057 (ar-CH), 2946 (CH<sub>2</sub>), 1448 (CH<sub>2</sub>), 1100 (C-O-C). Smp: 99 °C. TLC: R<sub>f</sub> (PE/EtOAc, 1:1) = 0.44.

## 2-(Trityloxy)acetaldehyde

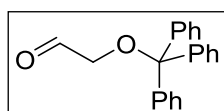

Synthesis: GP-8, reaction scale: 15.7 mmol of 2-(trityloxy)ethan-1-ol. The crude product was purified by filtration through a pad of silica gel (PE/EtOAc, 10:1).

Yellow oil, yield: 3.16 g, 10.5 mmol, 67 %.  $^1\text{H}$  NMR (500 MHz, Chloroform-*d*)  $\delta$  = 9.50 (t,  $^3J$  = 1.2 Hz, 1H, CHO), 7.47 (m, 6H, ar-2-**H**, ar-6-**H**), 7.33 (m, 6H, ar-3-**H**, ar-5-**H**), 7.27 (m, 3H, ar-4-**H**), 3.86 (d,  $^3J$  = 1.2 Hz, 2H, CH<sub>2</sub>). C<sub>21</sub>H<sub>18</sub>O<sub>2</sub> (302.37 g mol<sup>-1</sup>). IR(ATR):  $\tilde{\nu}$  [cm<sup>-1</sup>] = 3056 (ar, CH), 2974 (CH<sub>2</sub>), 1729 (CHO), 1451 (ar, C=C). TLC: R<sub>f</sub> (PE/EtOAc, 10:1) = 0.66.

## (*S,E*)-*N*-(2-(Trityloxy)ethylidene)-*tert*-butylsulfonamide (**5m**)

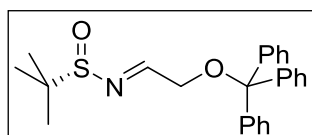

Synthesis: GP-2, reaction scale: 7.2 mmol of sulfonamide (**S**)-**1** and 7.13 mmol of 2-(trityloxy)acetaldehyde. Purification of the crude product by filtration through a short pad of silica gel (PE/EtOAc, 4:1).

Colourless, crystalline solid, yield: 1.36 g, 3.35 mmol, 47 %.  $^1\text{H}$  NMR (500 MHz, Chloroform-*d*)  $\delta$  = 8.19 (t,  $^3J$  = 3.3 Hz, 1H, CHN), 7.58 (d,  $^3J$  = 8.0 Hz, 6H, ar-2-**H**, ar-6-**H**), 7.38 (t,  $^3J$  = 7.6 Hz, 6H, ar-3-**H**, ar-5-**H**), 7.32 (t,  $^3J$  = 7.4 Hz, 3H, ar-4-**H**), 4.17 (t,  $^3J$  = 3.7 Hz, 2H, CH<sub>2</sub>), 1.28 (s, 9H, SC(CH<sub>3</sub>)<sub>3</sub>).  $^{13}\text{C}$  NMR (126 MHz, Chloroform-*d*)  $\delta$  = 166.9 (CHN), 143.4 (ar-C-1), 128.6 (ar-C-2, ar-C-6), 128.0 (ar-C-3, ar-C-5), 127.3 (ar-C-4), 87.4 (Ph<sub>3</sub>C), 66.4 (C(CH<sub>3</sub>)<sub>3</sub>), 60.4 (CH<sub>2</sub>), 22.4 (SC(CH<sub>3</sub>)<sub>3</sub>). C<sub>25</sub>H<sub>27</sub>NO<sub>2</sub>S (405.56 g mol<sup>-1</sup>), MS(ESI):  $m/z$  = 428.2 (428.17 [M+Na]<sup>+</sup>). TLC: R<sub>f</sub> (PE/EtOAc, 4:1) = 0.65.

## (*R,E*)-*N*-(2-(Benzyloxy)ethylidene)-*tert*-butylsulfonamide (**5n**)

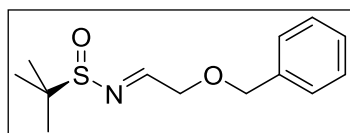

Synthesis: GP-2, reaction scale: 4.23 mmol of sulfonamide (**R**)-**1** and 4.3 mmol of 2-(benzyloxy)acetaldehyde. Purification by column chromatography (EtOAc/PE, 1:4). Decomposition was

observed via  $^1\text{H}$  NMR spectroscopy after 1 d. Compound **5n** has been first described by Tang, Volkman and Ellman [37].

Slightly yellow oil, yield: 869 mg, 3.43 mmol, 81 %.  $^1\text{H}$  NMR (300 MHz, Chloroform-*d*)  $\delta$  = 8.12 (t,  $^3J$  = 3.2 Hz, 1H, **CHN**), 7.38-7.29 (m, 5H, ar-**H**), 4.63 (s, 2H, **PhCH<sub>2</sub>**), 4.40 (d,  $^3J$  = 3.2 Hz, 2H, **CNCH<sub>2</sub>**), 1.21 (s, 9H, **SC(CH<sub>3</sub>)<sub>3</sub>**).  $\text{C}_{13}\text{H}_{19}\text{NO}_2\text{S}$  (253.36 g mol<sup>-1</sup>). TLC:  $R_f$  (EtOAc/PE, 1:4) = 0.34.  $[\alpha]_{589}^{20}$  = 180.5 ( $c$  = 1.43;  $\text{CHCl}_3$ ).

(*S*)-*N*-(2-(Allyloxy)ethylidene)-*tert*-butylsulfonamide (**5o**)

2-(Allyloxy)acetaldehyde

Silica gel adsorbed Sodium periodate was prepared according to the description of Roth and Stark [38]: Under stirring, Silica gel (5 g) was added to a solution of  $\text{NaIO}_4$  (1.29 g, 6.03 mmol) in  $\text{H}_2\text{O}$  (2.5 mL) at 70 °C. The water was evaporated in vacuo and the crude product was dried in an desiccator over  $\text{P}_2\text{O}_5$ .

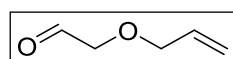

2-(Allyloxy)acetaldehyde was prepared as described by Karmann and Kazmaier [39]: To a suspension of silica gel adsorbed  $\text{NaIO}_4$  (3 g, 2.88 mmol) in absolute DCM (7.5 mL), a solution of allyloxy-1,2-propanediol (220 mg, 1.64 mmol) in absolute DCM (6 mL) was added dropwise. The reaction mixture was stirred for 2 h at rt and then filtered through a pad of silica gel. The silica gel was washed with DCM and the solvent was evaporated under reduced pressure to yield allyloxyacetaldehyde in pure form.

Yellow oil (crude product), yield: quant.  $^1\text{H}$  NMR (500 MHz, Chloroform-*d*):  $\delta$  [ppm] = 9.74 (s, 1H, **CHO**), 5.92 (m, 1H, **CH=CH<sub>2</sub>**), 5.32 (dddd,  $^4J$  = 1.6 Hz,  $^4J$  = 1.4 Hz,  $^2J$  = 1.4 Hz,  $^3J$  = 17.2 Hz, 1H, **CH=H<sub>Z</sub>CH<sub>E</sub>**), 5.26 (dddd,  $^4J$  = 1.4 Hz,  $^4J$  = 1.3 Hz,  $^2J$  = 1.2 Hz,  $^3J$  = 10.4 Hz, 1H, **CH=H<sub>E</sub>CH<sub>Z</sub>**), 4.11-4.09 (m, 4H, **CH<sub>2</sub>-O-CH<sub>2</sub>**).  $\text{C}_5\text{H}_8\text{O}_2$  (100.12 g mol<sup>-1</sup>).

(*S*)-*N*-(2-(Allyloxy)ethylidene)-*tert*-butylsulfonamide (**5o**)

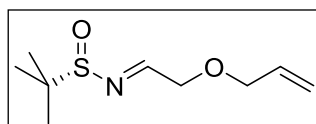

Synthesis: GP-1, reaction scale: 2.7 mmol of sulfonamide (**S**)-**1** and 2.58 mmol of 2-(allyloxy)acetaldehyde. The reaction mixture was dissolved in THF (4 mL) and the reaction time was stretched to 8 h.

Purification by column chromatography (PE/EtOAc, 4:1).

Yellow oil, yield: 0.125 g, 0.620 mmol, 24 %.  $^1\text{H}$  NMR (500 MHz, Chloroform-*d*):  $\delta$  [ppm] = 8.10 (t,  $^3J = 3.2$  Hz, 1H, CHN), 5.91 (m, 1H, CH=CH<sub>2</sub>), 5.30 (dddd,  $^4J = 1.6$  Hz,  $^4J = 1.5$  Hz,  $^3J = 17.2$  Hz,  $^2J = 1.6$  Hz, 1H, C=H<sub>Z</sub>CH<sub>E</sub>), 5.23 (dddd,  $^4J = 1.6$  Hz,  $^4J = 1.5$  Hz,  $^3J = 10.5$  Hz,  $^2J = 1.4$  Hz, 1H, C=H<sub>E</sub>CH<sub>Z</sub>), 4.39 (dd,  $^3J = 3.1$  Hz,  $^2J = 16.4$  Hz, 1H, CHNCH<sub>2</sub>O), 4.36 (dd,  $^3J = 3.2$  Hz,  $^2J = 16.3$  Hz, 1H, CHNCH<sub>2</sub>O), 4.10-4.08 (m, 2H, CH<sub>2</sub>CH=), 1.20 (s, 9H, SC(CH<sub>3</sub>)<sub>3</sub>).  $^{13}\text{C}$  NMR (125 MHz, Chloroform-*d*):  $\delta$  [ppm] = 166.9 (CHN), 133.9 (CH=CH<sub>2</sub>), 118.2 (CH=CH<sub>2</sub>), 72.4 (CH<sub>2</sub>CH=), 71.4 (CH<sub>2</sub>O), 57.1 (SCMe<sub>3</sub>), 22.5 (SC(CH<sub>3</sub>)<sub>3</sub>). C<sub>9</sub>H<sub>17</sub>NO<sub>2</sub>S (203.30 g mol<sup>-1</sup>). MS(ESI):  $m/z$  = 204.0 (204.31 [M+H]<sup>+</sup>). TLC: R<sub>f</sub> (PE/EtOAc, 4:1) = 0.34.  $[\alpha]_{589}^{20} = 232.3$  ( $c = 1.2$ ; CHCl<sub>3</sub>).

(*R,E*)-*N*-(2-(Benzylthio)ethylidene)-*tert*-butylsulfonamide (**5p**)

The synthesis of all precursors of **5p** was carried out as described by Zhdanko, Gulevich and Nenajdenko [40].

Phenylmethanethiol was synthesised as described by Zhdanko, Gulevich and Nenajdenko [40]. Brown fluid, yield: 9.106 g, 73 mmol, 56 %.  $^1\text{H}$  NMR (300 MHz, Chloroform-*d*)  $\delta$  = 7.45-7.43 (m, 4H, ar-2-H, ar-3-H, ar-5-H, ar-6-H), 7.34 (m, 1H, ar-4-H), 3.80 (s, 2H, CH<sub>2</sub>), 2.00 (s, 1H, SH).  $^{13}\text{C}$  NMR (75 MHz, Chloroform-*d*)  $\delta$  = 141.1 (ar-C-1), 128.6 (ar-C-3, ar-C-5), 128.0 (ar-C-4), 126.9 (ar-C-2, ar-C-6), 28.9 (CH<sub>2</sub>). C<sub>7</sub>H<sub>8</sub>S (124.20 g mol<sup>-1</sup>).

Benzyl(2,2-dimethoxyethyl)sulfane

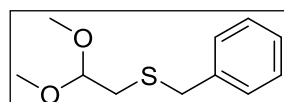 Sodium (1.76 g, 73.3 mmol, 1 equiv) was dissolved in a solution of phenylmethylthiol (9.12 g, 73.3 mmol, 1 equiv) in EtOH (38 mL). Afterwards, KI (372 mg, 2.24 mmol, 3 mol %) and chloroacetaldehyde dimethyl acetal (8.4 mL, 73.3 mmol, 1 equiv) were added and the reaction mixture was heated for 6 h to 80 °C. After cooling down to rt, the suspension was filtered, the residue washed with EtOH and the filtrate concentrated up under vacuum. The residue was diluted with water (45 mL) and washed with DCM (3 × 50 mL). The combined organic layers were washed with brine, dried over Na<sub>2</sub>SO<sub>4</sub> and the solvent was evaporated. Purification of the crude product by column chromatography (PE/EtOAc, 10:1) yielded benzyl(2,2-dimethoxyethyl)sulfane in pure

form. The synthesis of the title compound has been first described by Zhdanko, Gulevich and Nenajdenko [40].

Deeply yellow oil, yield: 9.39 g, 44.2 mmol, 60 %.  $^1\text{H}$  NMR (300 MHz, Chloroform-*d*)  $\delta$  = 7.38-7.30 (m, 4H, ar-2-**H**, ar-3-**H**, ar-5-**H**, ar-6-**H**), 7.25 (m, 1H, ar-4-**H**), 4.43 (t,  $^3J$  = 5.5 Hz, 1H, **CH**(OCH<sub>3</sub>)<sub>2</sub>), 3.80 (s, 2H, ar-**CH**<sub>2</sub>), 3.36 (s, 6H, **CH**(OCH<sub>3</sub>)<sub>2</sub>), 2.61 (d,  $^3J$  = 5.5 Hz, 2H, **SCH**<sub>2</sub>**CH**(OCH<sub>3</sub>)<sub>2</sub>). C<sub>11</sub>H<sub>16</sub>O<sub>2</sub>S (212.31 g mol<sup>-1</sup>).

### 2-(Benzylthio)acetaldehyde

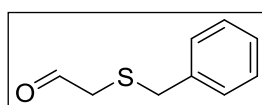

Benzyl(2,2-dimethoxyethyl)sulfane (5.00 g, 23.5 mmol, 1 equiv) was dissolved in H<sub>2</sub>SO<sub>4</sub> (0.5 M, 21 mL) and the solution was heated for 5.5 h to 60 °C. After cooling down to rt, a solution of saturated NaHCO<sub>3</sub> was added until the pH was neutral. Afterwards, the solution was extracted with DCM (4 × 15 mL). The combined organic layers were dried over Na<sub>2</sub>SO<sub>4</sub> and the solvent was evaporated under reduced pressure to yield 2-(benzylthio)acetaldehyde in pure form. The synthesis of the title compound has been first described by Zhdanko, Gulevich and Nenajdenko [40].

Deeply yellow oil, yield: 3.875 g, 23.31 mmol, 99 %.  $^1\text{H}$  NMR (300 MHz, Chloroform-*d*)  $\delta$  = 9.43 (t,  $^3J$  = 3.4 Hz, 1H, **CHO**), 7.37-7.27 (m, 5H, C<sub>6</sub>**H**<sub>5</sub>), 3.64 (s, 2H, ar-**CH**<sub>2</sub>), 3.09 (d,  $^3J$  = 3.4 Hz, 2H, **SCH**<sub>2</sub>**CHO**). C<sub>9</sub>H<sub>10</sub>OS (166.24 g mol<sup>-1</sup>).

### (*R,E*)-*N*-(2-(Benzylthio)ethylidene)-*tert*-butylsulfonamide (**5p**)

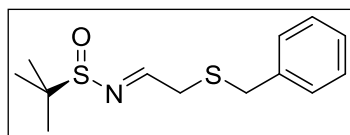

Synthesis: GP-2, reaction scale: 24.0 mmol of sulfonamide (**R**)-**1** and 23.34 mmol of 2-(benzylthio)acetaldehyde. Purification by column chromatography (PE/EtOAc, 4:1). Compound **5p** has been first described by Yao and Yuan [32].

Brown oil, yield: 5.212 g, 19.37 mmol, 83 %.  $^1\text{H}$  NMR (300 MHz, Chloroform-*d*):  $\delta$  (ppm) = 7.98 (t,  $^3J$  = 5.6 Hz, 1H, **CHN**), 7.38-7.26 (m, 5H, C<sub>6</sub>**H**<sub>5</sub>), 3.70 (s, 2H, Ph-**CH**<sub>2</sub>), 3.34 (d,  $^3J$  = 2.8 Hz, 2H, **SCH**<sub>2</sub>), 1.23 (s, 9H, C(**CH**<sub>3</sub>)<sub>3</sub>). C<sub>13</sub>H<sub>19</sub>NOS<sub>2</sub> (269.42 g mol<sup>-1</sup>).

(*S,E*)-*N*-(4-Cyanobutyliden)-*tert*-butylsulfinamide (**5q**)

4-Iodobutan-1-ol

4-Iodobutan-1-ol was prepared as described by Sasano, Nagasawa, Yamazaki, Shibuya, Park, Iwabuchi [41].

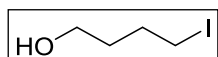

A solution of iodine (7.650 g, 30.14 mmol) in THF (50 mL) was added dropwise at 0 °C to a rigorously stirred suspension of NaBH<sub>4</sub> (0.568 g, 15.01 mmol) in THF (80 mL) over a period of 2 h. The reaction mixture was allowed to warm up to rt overnight. The deep purple solution was diluted with an aqueous Na<sub>2</sub>SO<sub>3</sub> solution until it turned completely colourless. The organic layer was separated, the aqueous layer extracted with Et<sub>2</sub>O (3 × 75 mL) and the combined organic layers dried over Na<sub>2</sub>SO<sub>4</sub>. Evaporation of the solvent yielded the title compound, which had to be used quickly in further conversions because it was observed to reform THF or polymerise. When the title compound perishes, it starts to turn brown or red.

Colourless oil, yield: 8.141 g, 40.70 mmol, 68 %. <sup>1</sup>H NMR (300 MHz, Chloroform-*d*) δ (ppm) = 3.66-3.60 (m, 2H, HOCH<sub>2</sub>), 3.19 (t, <sup>3</sup>*J* = 6.9 Hz, 2H, ICH<sub>2</sub>), 1.90-1.83 (m, 2H, HOCH<sub>2</sub>CH<sub>2</sub>), 1.69-1.59 (m, 2H, ICH<sub>2</sub>CH<sub>2</sub>). C<sub>4</sub>H<sub>9</sub>IO (200.02 g mol<sup>-1</sup>).

5-Hydroxypentanenitrile

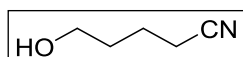

To a solution of 5-iodobutan-1-ol (16.5 g, 82.5 mmol, 1 equiv) in dry DMSO (75 mL), solid NaCN (6.06 g, 124 mmol, 1.5 equiv) was added in small portions at 0 °C. The reaction progress was surveilled by NMR spectroscopy. It is instant and the title compound as well as THF (6 : 5) are formed. After complete conversion, the reaction mixture was diluted with water (75 mL) and extracted with Et<sub>2</sub>O (5 × 100 mL). The combined organic layers were washed with brine and dried over Na<sub>2</sub>SO<sub>4</sub>. Evaporation of the solvent yielded the title compound in pure form.

Slightly yellow oil, yield 3.596 g, 36.3 mmol, 52 %. <sup>1</sup>H NMR (600 MHz, DMSO-*d*<sub>6</sub>) δ = 3.35 (t, <sup>3</sup>*J* = 6.2 Hz, 2H, HOCH<sub>2</sub>), 2.47 (t, <sup>3</sup>*J* = 7.0 Hz, 2H, N≡CCH<sub>2</sub>), 1.56-1.50 (m, 2H, N≡CCH<sub>2</sub>CH<sub>2</sub>), 1.50-1.40 (m, 2H, HOCH<sub>2</sub>CH<sub>2</sub>). <sup>13</sup>C NMR (151 MHz, DMSO-*d*<sub>6</sub>) δ = 120.8 (C≡N), 59.6 (HOCH<sub>2</sub>), 31.3 (HOCH<sub>2</sub>CH<sub>2</sub>), 21.7 (HO(CH<sub>2</sub>)<sub>2</sub>CH<sub>2</sub>), 16.2 (N≡CCH<sub>2</sub>). C<sub>5</sub>H<sub>9</sub>NO (99.13 g mol<sup>-1</sup>).

### 5-Oxopentanenitrile

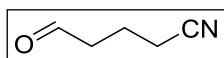

Synthesis: GP-8, reaction scale: 43.2 mmol of 5-hydroxypentanenitrile. Purification by filtration through a pad of silica gel (PE/EtOAc, 10:1).

Red oil, yield 2.434 g, 25.06 mmol, 58 %.  $^1\text{H}$  NMR (300 MHz, Chloroform-*d*)  $\delta$  = 9.81 (s, 1H, **CHO**), 2.70 (t,  $^3J$  = 6.9 Hz, 2H, **HCOCH<sub>2</sub>**), 2.46 (t,  $^3J$  = 7.0 Hz, 2H, **N $\equiv$ CCH<sub>2</sub>**), 1.98 (p,  $^3J$  = 6.9 Hz, 2H, **N $\equiv$ CCH<sub>2</sub>CH<sub>2</sub>**).  $\text{C}_5\text{H}_7\text{NO}$  (97.13 g mol<sup>-1</sup>).

### (*S,E*)-*N*-(4-Cyanobutylidene)-*tert*-butylsulfonamide (**5q**)

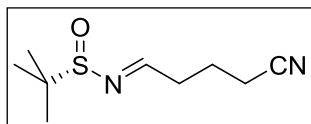

Synthesis: GP-2, reaction scale: 25.1 mmol of sulfonamide (**S**)-**1** and 26.0 mmol of 5-oxopentanenitrile. The crude product was purified by column chromatography.

Orange oil, yield 4.02 g, 20.1 mmol, 80 %.  $^1\text{H}$  NMR (500 MHz, Chloroform-*d*):  $\delta$  [ppm] = 8.10 (t,  $^3J$  = 3.7 Hz, 1H, **CHN**), 2.71 (td,  $^3J$  = 6.8 Hz,  $^3J$  = 3.5 Hz, 2H, **CHNCH<sub>2</sub>**), 2.51 (ddd,  $^2J$  = 17.0 Hz,  $^3J$  = 7.3 Hz,  $^3J$  = 4.1 Hz, 1H, **CH<sub>2</sub>CH<sub>2</sub>CN**), 2.48 (ddd,  $^2J$  = 17.0 Hz,  $^3J$  = 7.1 Hz,  $^3J$  = 3.8 Hz, 1H, **CH<sub>2</sub>CH<sub>2</sub>CN**), 2.09-2.01 (m, 2H, **CH<sub>2</sub>-CN**), 1.2 (s, 9H, **C(CH<sub>3</sub>)<sub>3</sub>**).  $^{13}\text{C}$  NMR (126 MHz, Chloroform-*d*):  $\delta$  [ppm] = 167.3 (**CHN**), 119.1 (**CN**), 56.9 (**C(CH<sub>3</sub>)<sub>3</sub>**), 34.7 (**HC <sup>$\alpha$</sup> NCH<sub>2</sub>**), 22.8 (**C(CH<sub>3</sub>)<sub>3</sub>**), 21.4 (**CH<sub>2</sub>CN**), 17.1 (**CH<sub>2</sub>CH<sub>2</sub>CN**).  $\text{C}_9\text{H}_{16}\text{N}_2\text{OS}$  (200.30 g mol<sup>-1</sup>). TLC:  $R_f$  (PE/EtOAc, 1:1) = 0.3. IR (ATR):  $\tilde{\nu}$  [cm<sup>-1</sup>] = 3501 (CH), 2962 (CH), 2927 (CH), 2901 (CH), 2243 (CN), 1625 (C=N), 1477 (SO), 1458, 1423, 1363, 1179, 1093 (SC), 102, 584.

### Benzyl (*S,E*)-4-((*tert*-butylsulfinyl)imino)butanoate (**5r**)

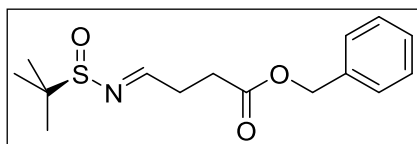

Synthesis: GP-2, reaction scale: 1.3 mmol of sulfonamide (**S**)-**1** and 1.14 mmol of benzyl-5-oxobutanoate. Purification by column chromatography (PE/EtOAc, 4:1).

Yellow oil, yield: 267 mg, 904  $\mu\text{mol}$ , 79 %.  $^1\text{H}$  NMR (500 MHz, Chloroform-*d*)  $\delta$  = 8.12 (t,  $^3J$  = 3.0 Hz, 1H, **CHN**), 7.37-7.31 (m, 5H, **C<sub>6</sub>H<sub>5</sub>**), 5.12-5.08 (m, 2H, **arCH<sub>2</sub>O**), 2.87-2.83 (m, 2H,

CHNCH<sub>2</sub>), 2.77 (m, 1H, CH<sub>2</sub>CO<sub>2</sub>), 2.68 (m, 1H, CH<sub>2</sub>CO<sub>2</sub>), 1.14 (s, 9H, SC(CH<sub>3</sub>)<sub>3</sub>). <sup>13</sup>C NMR (125 MHz, Chloroform-*d*)  $\delta$  = 172.2 (CO<sub>2</sub>), 167.2 (CHN), 135.8 (ar-C-1), 128.7 (ar-C-3, ar-C-5), 128.4 (ar-C-4), 128.2 (ar-C-2, ar-C-6), 66.6 (ar-CH<sub>2</sub>O), 56.8 (SC(CH<sub>3</sub>)<sub>3</sub>), 31.0 (CHNCH<sub>2</sub>), 29.3 (CH<sub>2</sub>CO<sub>2</sub>), 22.3 (SC(CH<sub>3</sub>)<sub>3</sub>). C<sub>15</sub>H<sub>21</sub>NO<sub>3</sub>S (294.40 g mol<sup>-1</sup>). MS(ESI): *m/z* = 318.11341 (318.11344 [M+Na]<sup>+</sup>). [ $\alpha$ ]<sub>589</sub><sup>20</sup> = 143.3 (*c* = 1.1; CHCl<sub>3</sub>). TLC: R<sub>f</sub> (PE/EtOAc, 4:1) = 0.28.

*tert*-Butyl (*S,E*)-4-((*tert*-butylsulfinyl)imino)butanoate (**5s**)

4-(*tert*-Butoxy)-4-oxobutanoic Acid

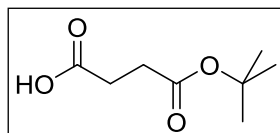

The monoester of succinate was prepared as described by Srinivasan, Uttamchandani and Yao [42]: *Tert*-butanol (10 mL) was added to a solution of succinic anhydride (6.04 g, 60.40 mmol), *N*-hydroxysuccinimide (2.53g, 22.01 mmol) and DMAP (0.88 g, 7.23 mmol) in toluene (100 mL) and the solution was heated for 48 h under reflux conditions. After cooling down to rt, two layers formed in the reaction vessel (brown oil and clear, colourless solution). The crude solution was diluted with EtOAc (50 mL) and washed with citric acid (10 %, 2 × 50 mL) and brine. The organic layer was dried over Na<sub>2</sub>SO<sub>4</sub>, the solvent evaporated and the crude product was recrystallized from Et<sub>2</sub>O/PE (1:3, 25 mL) to yield the title compound in quantitative yield.

Colourless crystals, yield: 10.52 g, 60.40 mmol, quant. <sup>1</sup>H NMR (500 MHz, Chloroform-*d*)  $\delta$  = 2.63 (t, <sup>3</sup>*J* = 6.2 Hz, 2H, CO<sub>2</sub>HCH<sub>2</sub>), 2.55 (t, <sup>3</sup>*J* = 6.8 Hz, 2H, HO<sub>2</sub>CCH<sub>2</sub>CH<sub>2</sub>), 1.45 (s, 9H, CO<sub>2</sub>C(CH<sub>3</sub>)<sub>3</sub>). <sup>13</sup>C NMR (126 MHz, Chloroform-*d*)  $\delta$  = 177.0 (CO<sub>2</sub>H), 171.4 (CO<sub>2</sub>C(CH<sub>3</sub>)<sub>3</sub>), 81.03 (C(CH<sub>3</sub>)<sub>3</sub>), 30.10 (CH<sub>2</sub>CO<sub>2</sub>C(CH<sub>3</sub>)<sub>3</sub>), 29.07 (CH<sub>2</sub>CO<sub>2</sub>H), 28.03 (C(CH<sub>3</sub>)<sub>3</sub>). C<sub>8</sub>H<sub>14</sub>O<sub>4</sub> (174.20 g mol<sup>-1</sup>). Smp: 49 °C (44-45 °C, [42]).

*tert*-Butyl 4-hydroxybutanoate

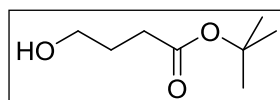

The title compound was prepared as described by Chen, Zhao, Chen, Chen, Kuznetsova, Wong and Ojima [43].

A solution of BH<sub>3</sub> × Me<sub>2</sub>S (2M in THF, 11.4 mL, 22.76 mmol) was added dropwise to a heavily stirred solution of mono *tert*-butyl succinate (3.69 g, 21.17 mmol) in THF (35 mL) and the solution was stirred at ambient temperature for 17 h. The reaction mixture was diluted in EtOAc (150 mL) and the organic layer was washed with H<sub>2</sub>O (30 mL) and brine (10 mL).



Drying over Na<sub>2</sub>SO<sub>4</sub> and evaporation of the solvent yielded quantitatively *tert*-butyl-4-hydroxybutanoate.

Viscous oil, yield: 3.71 g, 18.5 mmol, 80 %. <sup>1</sup>H NMR (500 MHz, Chloroform-*d*)  $\delta$  = 3.65 (t, <sup>3</sup>*J* = 6.2 Hz, 2H, CH<sub>2</sub>OH), 2.37-2.29 (t, <sup>3</sup>*J* = 7.1 Hz, 2H, CH<sub>2</sub>CO<sub>2</sub>), 1.89-1.78 (m, 2H, CH<sub>2</sub>-CH<sub>2</sub>-CH<sub>2</sub>), 1.43 (s, 9H, CO<sub>2</sub>C(CH<sub>3</sub>)<sub>3</sub>). <sup>13</sup>C NMR (126 MHz, Chloroform-*d*)  $\delta$  = 173.4 (CO<sub>2</sub>), 80.6 (C(CH<sub>3</sub>)<sub>3</sub>), 62.3 (HOCH<sub>2</sub>), 32.6 (CH<sub>2</sub>CO<sub>2</sub>), 28.2 (C(CH<sub>3</sub>)<sub>3</sub>), 28.0 (CH<sub>2</sub>-CH<sub>2</sub>-CH<sub>2</sub>). C<sub>8</sub>H<sub>14</sub>O<sub>3</sub> (158.20 g mol<sup>-1</sup>).

#### *tert*-Butyl 4-oxobutanoate

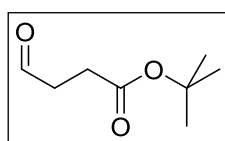

Synthesis: GP-8, reaction scale: 18.1 mmol of *tert*-butyl 4-hydroxybutanoate. The crude product was filtered through a pad of silica gel to yield the title compound in pure form.

Colourless oil, yield: 2.1 g, 13 mmol, 72 %. <sup>1</sup>H NMR (500 MHz, Chloroform-*d*)  $\delta$  = 9.80 (s, 1H, CHO), 2.73 (t, <sup>3</sup>*J* = 6.6 Hz, 2H, CHOCH<sub>2</sub>CH<sub>2</sub>), 2.55 (t, <sup>3</sup>*J* = 6.6 Hz, 2H, CHOCH<sub>2</sub>), 1.44 (s, 9H, CO<sub>2</sub>C(CH<sub>3</sub>)<sub>3</sub>). C<sub>8</sub>H<sub>14</sub>O<sub>3</sub> (158.20 g mol<sup>-1</sup>) MS(ESI): *m/z* = 181.0 (181.1 [M+Na]<sup>+</sup>), 339.3 (339.2 [2M+Na]<sup>+</sup>), 497.3 (497.3 [3M+Na]<sup>+</sup>). IR(ATR):  $\tilde{\nu}$  [cm<sup>-1</sup>] = 2977 (CH<sub>3</sub>), 2930 (CH<sub>2</sub>), 1727 (CHO). TLC: R<sub>f</sub> (PE/EtOAc, 4:1) = 0.52.

#### *tert*-Butyl (*S,E*)-4-((*tert*-butylsulfinyl)imino)butanoate (**5s**)

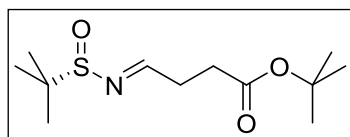

Synthesis: GP-2, reaction scale: 6.31 mmol of sulfinamide (**S**)-**1**. Isolation of title compound by column chromatography (PE/EtOAc, 4:1).

Colourless crystalline solid, yield: 1.06 g, 4.04 mmol, 64 %. <sup>1</sup>H NMR (500 MHz, Chloroform-*d*)  $\delta$  = 8.12 (t, <sup>3</sup>*J* = 3.3 Hz, 1H, CHN), 2.79 (ddd, <sup>3</sup>*J* = 7.2 Hz, <sup>3</sup>*J* = 6.7 Hz, <sup>3</sup>*J* = 3.5 Hz, 2H, CO<sub>2</sub>CH<sub>2</sub>), 2.63 (ddd, <sup>2</sup>*J* = 16.8 Hz, <sup>3</sup>*J* = 7.2 Hz, 1H, CH<sub>2</sub>CHN), 2.55 (dt, <sup>2</sup>*J* = 16.8 Hz, <sup>3</sup>*J* = 6.7 Hz, 1H, CH<sub>2</sub>CHN), 1.44 (s, 9H, CO<sub>2</sub>C(CH<sub>3</sub>)<sub>3</sub>), 1.18 (s, 9H, SC(CH<sub>3</sub>)<sub>3</sub>). <sup>13</sup>C NMR (126 MHz, Chloroform-*d*)  $\delta$  = 171.5 (CO<sub>2</sub>), 167.6 (CHN), 80.7 (CO<sub>2</sub>C(CH<sub>3</sub>)<sub>3</sub>), 56.7 (SC(CH<sub>3</sub>)<sub>3</sub>), 31.1 (CH<sub>2</sub>CHN), 30.5 (CO<sub>2</sub>CH<sub>2</sub>), 28.1 (CO<sub>2</sub>C(CH<sub>3</sub>)<sub>3</sub>), 22.3 (SC(CH<sub>3</sub>)<sub>3</sub>). C<sub>12</sub>H<sub>23</sub>NO<sub>3</sub>S (261.38 g mol<sup>-1</sup>), MS(ESI): *m/z* = 262.1 (262.1 [M+H]<sup>+</sup>), 284.1 (284.1 [M+Na]<sup>+</sup>). TLC: R<sub>f</sub> (PE/EtOAc, 4:1) = 0.26. IR(ATR):  $\tilde{\nu}$  [cm<sup>-1</sup>] = 2984 (CH<sub>3</sub>), 2863 (CH<sub>2</sub>), 1727 (C=O), 1622 (C=N), 1087 (S=O).

(*S,E*)-*N*-(4-((*tert*-Butyldimethylsilyl)oxy)butylidene)-*tert*-butylsulfonamide (**5t**)

4-((*tert*-Butyldimethylsilyl)oxy)butanal

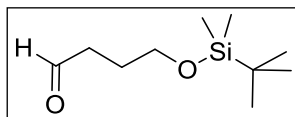

Synthesis: GP-8, reaction scale: 4.127 mmol of 4-((*tert*-butyldimethylsilyl)oxy)butan-1-ol. The title compound was obtained in pure form without further purification. The title compound has been first described by Asano and Matsubara [44].

Brightly yellow oil, yield: quant.  $^1\text{H}$  NMR (500 MHz, Chloroform-*d*)  $\delta$  = 9.78 (t,  $^3J$  = 1.6 Hz, 1H, CHO), 3.65 (t,  $^3J$  = 6.0 Hz, 2H, SiOCH<sub>2</sub>), 2.50 (td,  $^3J$  = 7.1 Hz,  $^3J$  = 1.6 Hz, 2H, CHOCH<sub>2</sub>), 1.86 (p,  $^3J$  = 6.5 Hz, 2H, CH<sub>2</sub>CH<sub>2</sub>CH<sub>2</sub>), 0.88 (s, 9H, C(CH<sub>3</sub>)<sub>3</sub>), 0.04 (s, 6H, Si(CH<sub>3</sub>)<sub>2</sub>). C<sub>10</sub>H<sub>22</sub>O<sub>2</sub>Si (202.37 g mol<sup>-1</sup>).

(*S,E*)-*N*-(4-((*tert*-Butyldimethylsilyl)oxy)butylidene)-*tert*-butylsulfonamide (**5t**)

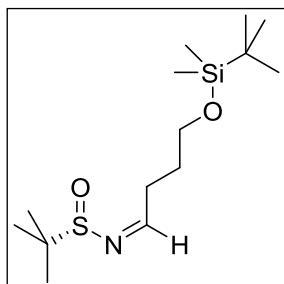

Synthesis: GP-1, reaction scale: 4.13 mmol of 4-((*tert*-butyldimethylsilyl)oxy)butanal and 4.30 mmol of sulfonamide (**S**)-**1**. Reaction for 1 h at 85 °C. The reaction progress was monitored by TLC. Purification by column chromatography. Compound **5t** has already been described by Bauer, DiBlasi and Tan [45].

Colourless oil, yield: 1.13 g, 3.70 mmol, 90 %.  $^1\text{H}$  NMR (500 MHz, Chloroform-*d*)  $\delta$  = 8.10 (t,  $^3J$  = 4.5 Hz, 1H, CHN), 3.68 (t,  $^3J$  = 6.2 Hz, 2H, OCH<sub>2</sub>), 2.60 (td,  $^3J$  = 7.5 Hz,  $^3J$  = 4.5 Hz, 2H, CHNCH<sub>2</sub>), 1.88-1.82 (m, 2H, OCH<sub>2</sub>CH<sub>2</sub>), 1.19 (s, 9H, SC(CH<sub>3</sub>)<sub>3</sub>), 0.89 (s, 9H, SiC(CH<sub>3</sub>)<sub>3</sub>), 0.05 (s, 6H, Si(CH<sub>3</sub>)<sub>2</sub>).  $^{13}\text{C}$  NMR (126 MHz, Chloroform-*d*)  $\delta$  = 169.6 (CN), 62.3 (SiC(CH<sub>3</sub>)<sub>3</sub>), 56.7 (SC(CH<sub>3</sub>)<sub>3</sub>), 32.9 (OCH<sub>2</sub>), 28.7 (CHNCH<sub>2</sub>), 26.1 (SiC(CH<sub>3</sub>)<sub>3</sub>), 22.5 (SC(CH<sub>3</sub>)<sub>3</sub>), 18.5 (OCH<sub>2</sub>CH<sub>2</sub>), -5.2 (Si(CH<sub>3</sub>)<sub>2</sub>). C<sub>14</sub>H<sub>31</sub>NO<sub>2</sub>SSi (305.55 g mol<sup>-1</sup>). MS(ESI):  $m/z$  = 306.1924 (306.1918 [M+H]<sup>+</sup>). TLC: R<sub>f</sub> (PE/EtOAc, 2:1) = 0.54.

(*S,E*)-*N*-(4-Chlorobutylidene)-*tert*-butylsulfonamide (**5u**)

4-Chlorobutanal

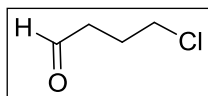

Synthesis: GP-8, reaction scale: 37.0 mmol of 4-chlorobutane-1-ol. No further purification.

Yellow oil, yield: 3.04 g, 28.5 mmol, 77 %.  $^1\text{H}$  NMR (300 MHz, Chloroform-*d*)  $\delta$  = 9.81 (t,  $^3J$  = 1.1 Hz, 1H, CHO), 3.60 (t,  $^3J$  = 6.3 Hz, 2H, CH<sub>2</sub>Cl), 2.67 (td,  $^3J$  = 7.1 Hz,  $^3J$  = 1.1 Hz, 2H, CHOCH<sub>2</sub>), 2.30-1.91 (m, 2H, CH<sub>2</sub>CH<sub>2</sub>CH<sub>2</sub>). C<sub>4</sub>H<sub>7</sub>ClO (106.55 g mol<sup>-1</sup>). TLC: R<sub>f</sub> (EtOAc) = 0.7.

(*S,E*)-*N*-(4-Chlorobutylidene)-*tert*-butylsulfonamide (**5u**)

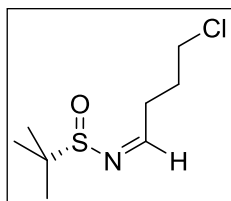

Synthesis: GP-1, reaction scale: 8.24 mmol of sulfonamide (**S**)-**1** and 8.5 mmol of 4-chlorobutanal. Reaction mixture was heated up to 90 °C. No further purification.

Orange oil, yield: 1.57 g, 7.00 mmol, 85 %.  $^1\text{H}$  NMR (300 MHz, Chloroform-*d*)  $\delta$  = 8.10 (t,  $^3J$  = 4.0 Hz, 1H, CHN), 3.62 (td,  $^3J$  = 6.5 Hz,  $^4J$  = 1.2 Hz, 2H, ClCH<sub>2</sub>), 2.78-2.66 (m, 2H, CHNCH<sub>2</sub>), 2.17-2.10 (m, 2H, CHNCH<sub>2</sub>CH<sub>2</sub>), 1.19 (s, 9H, SC(CH<sub>3</sub>)<sub>3</sub>).  $^{13}\text{C}$  NMR (75 MHz, Chloroform-*d*)  $\delta$  = 168.1 (CHN), 56.8 (SC(CH<sub>3</sub>)<sub>3</sub>), 44.2 (ClCH<sub>2</sub>), 33.3 (CHNCH<sub>2</sub>), 28.1 (CHNCH<sub>2</sub>CH<sub>2</sub>), 22.5 (SC(CH<sub>3</sub>)<sub>3</sub>). C<sub>8</sub>H<sub>16</sub>ClNOS (209.73 g mol<sup>-1</sup>). TLC: R<sub>f</sub> (EtOAc) = 0.64.

(*S,E*)-*N*-(5-Azidopentylidene)-*tert*-butylsulfonamide (**5v**)

5-Iodopentane-1-ol

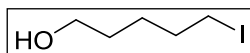

This synthesis was carried out analogue to the conversion of THF as first described by Sasano, Nagasawa, Yamazaki, Shibuya, Park and Iwabuchi [41] with some modifications.

NaBH<sub>4</sub> (1,00 g, 27 mmol, 1 equiv) was dissolved in dry Et<sub>2</sub>O (25 mL). The suspension was cooled to 0 °C and a solution of tetrahydropyran (10 mL, 102 mmol, 3.7 equiv) in Et<sub>2</sub>O (25 mL) was added in one portion. A solution of iodine (13.4 g, 52.8 mmol, 2 equiv) in Et<sub>2</sub>O

(50 mL) was added dropwise to the reaction mixture over a period of more than 3 hours at 0 °C. After each portion, the reaction mixture turned instantly a dark purple colour, which bleached within about 30 seconds. After the addition was complete, the solution was allowed to warm to room temperature overnight. Water was added to the resulting purple solution which immediately developed heat and gas. The organic solvent was evaporated and the aqueous layer was extracted with Et<sub>2</sub>O (3 × 70 mL). The combined organic layers were washed with a solution of Na<sub>2</sub>SO<sub>3</sub> and brine and dried over Na<sub>2</sub>SO<sub>4</sub> to yield the title compound in form of a slightly orange, highly fluid oil.

Colourless oil, yield: 2.36 g, 11.02 mmol, 41 %. <sup>1</sup>H NMR (500 MHz, Chloroform-*d*) δ = 3.77 (t, <sup>3</sup>*J* = 6.4 Hz, 1H, OH), 3.66 (t, <sup>3</sup>*J* = 6.4 Hz, 2H, HOCH<sub>2</sub>), 3.20 (t, <sup>3</sup>*J* = 7.0 Hz, 2H, ICH<sub>2</sub>), 1.86 (p, <sup>3</sup>*J* = 7.0 Hz, 2H, ICH<sub>2</sub>CH<sub>2</sub>CH<sub>2</sub>), 1.63- 1.52 (m, 2H, HOCH<sub>2</sub>CH<sub>2</sub>), 1.52- 1.42 (m, 1H, ICH<sub>2</sub>CH<sub>2</sub>). <sup>13</sup>C NMR (126 MHz, Chloroform-*d*) δ = 62.8 (HOCH<sub>2</sub>), 33.4 (ICH<sub>2</sub>), 31.7 (ICH<sub>2</sub>CH<sub>2</sub>CH<sub>2</sub>), 30.5 (HOCH<sub>2</sub>CH<sub>2</sub>), 26.9 (ICH<sub>2</sub>CH<sub>2</sub>). C<sub>5</sub>H<sub>9</sub>IO (214.05 g mol<sup>-1</sup>).

#### 5-Azidopentane-1-ol

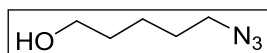

Similar reaction conditions were used as described by Sasano, Nagasawa, Yamazaki, Shibuya, Park and Iwabuchi [41]: An aqueous solution of NaN<sub>3</sub> (1.78 g, 26.5 mmol, 2.4 eq in 25 mL) was added to a solution of freshly prepared 5-iodopentanol (2.36 g, 11.0 mmol, 1 equiv) in THF (25 mL). After 12 hours, the dark yellow reaction mixture was diluted with an aqueous solution of Na<sub>2</sub>SO<sub>3</sub>, which made the colour vanish instantly. The organic solvent was evaporated and the residue was extracted with Et<sub>2</sub>O (3 × 50 mL) and dried over Na<sub>2</sub>SO<sub>4</sub>. Evaporation of the solvent yielded the title compound in form of a colourless, thin oil (1.313 g, 10.17 mmol, 92 %).

An alternative preparation was executed, starting from 5-aminopentanol-1-ol:

An azide transfer reagent was prepared in situ, as proposed by Barner-Kowolik et al. [46] and applied, as described by Días et al. [47]: Trifluoromethanesulfonic anhydride (3.25 mL, 19.4 mmol, 2.0 equiv) was added dropwise at 0 °C to a suspension of NaN<sub>3</sub> (4.53 g, 69.8 mmol, 7.2 equiv) in a mixture of DCM and H<sub>2</sub>O (9:17, 25 mL). After 2 h, the aqueous layer was separated, extracted with DCM (15 mL) and the combined organic layers were washed with a saturated solution of Na<sub>2</sub>CO<sub>3</sub> and dried over Na<sub>2</sub>SO<sub>4</sub>. After reduction of the solvent under reduced pressure, the concentrated solution was added to a mixture of 5-

aminopentan-1-ol (1.05 mL, 9.69 mmol, 1.0 equiv),  $\text{CuSO}_4 \times 5 \text{H}_2\text{O}$  (200 mg, 0.8 mmol, 0.1 equiv) and  $\text{K}_2\text{CO}_3$  (1.6 g, 11.6 mmol, 1.2 equiv) in  $\text{H}_2\text{O}/\text{MeOH}$  (2:3, 70 mL). After 12 h, the organic solvent was evaporated and the residue was extracted with  $\text{Et}_2\text{O}$  ( $3 \times 50 \text{ mL}$ ). The combined organic layers were dried over  $\text{Na}_2\text{SO}_4$  and the solvent evaporated to yield the title compound (1.05 g, 8.14 mmol, 84 %).

$^1\text{H}$  NMR (500 MHz, Chloroform-*d*)  $\delta$  = 3.66 (t,  $^3J$  = 6.4 Hz, 2H,  $\text{HOCH}_2$ ), 3.29 (t,  $^3J$  = 6.9 Hz, 2H,  $\text{N}_3\text{CH}_2$ ), 1.68-1.57 (m, 4H,  $\text{N}_3\text{CH}_2\text{CH}_2$ ,  $\text{HOCH}_2\text{CH}_2$ ), 1.50-1.43 (m, 2H,  $\text{N}_3\text{CH}_2\text{CH}_2\text{CH}_2$ ).  $^{13}\text{C}$  NMR (126 MHz, Chloroform-*d*)  $\delta$  = 62.8 (CHO), 51.5 ( $\text{CN}_3$ ), 32.3 ( $\text{N}_3\text{CH}_2\text{CH}_2\text{CH}_2$ ), 28.8 ( $\text{HOCH}_2\text{CH}_2$ ), 23.2 ( $\text{N}_3\text{CH}_2\text{CH}_2$ ).  $\text{C}_5\text{H}_9\text{N}_3\text{O}$  (127.15  $\text{g mol}^{-1}$ ).

### 5-Azidopentanal

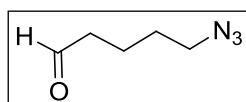

Synthesis: GP-8, reaction scale: 8.17 mmol of 5-azidopentanol. The product was slightly contaminated by DMSO and was applied for the following synthesis without further purification.

Colourless oil, yield: 0.61 g, 4.74 mmol, 58 %.  $^1\text{H}$  NMR (500 MHz, Chloroform-*d*)  $\delta$  = 9.79 (t,  $^3J$  = 1.4 Hz, 1H, CHO), 3.31 (t,  $^3J$  = 6.6 Hz, 2H,  $\text{CH}_2\text{N}_3$ ), 2.50 (td,  $^3J$  = 7.1 Hz,  $^4J$  = 1.5 Hz, 2H,  $\text{CHOCH}_2$ ), 1.77- 1.69 (m, 2H,  $\text{N}_3\text{CH}_2\text{CH}_2\text{CH}_2$ ), 1.67- 1.60 (m, 2H,  $\text{N}_3\text{CH}_2\text{CH}_2$ ).  $^{13}\text{C}$  NMR (126 MHz, Chloroform-*d*)  $\delta$  = 201.8 (CHO), 51.3 ( $\text{N}_3\text{CH}_2$ ), 43.4 ( $\text{CHOCH}_2$ ), 28.4 ( $\text{N}_3\text{CH}_2\text{CH}_2$ ), 19.4 ( $\text{N}_3\text{CH}_2\text{CH}_2\text{CH}_2$ ).  $\text{C}_5\text{H}_9\text{N}_3\text{O}$  (127.15  $\text{g mol}^{-1}$ ).

### (*S,E*)-*N*-(5-Azidopentylidene)-*tert*-butylsulfonamide (**5v**)

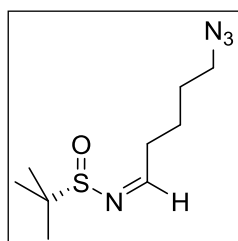

Synthesis: GP-2, reaction scale: 10.08 mmol of sulfonamide (**S**)-**1** and 10.10 mmol of 5-azidopentanal. Purification by column chromatography (PE/EtOAc, 4:1). Compound **5v** has been first described by Ye, He and Zhang [29].

Colourless oil, yield: 1.21 g, 5.24 mmol, 52 % (over two steps, referred to 5-azidopentane-1-ol).  $^1\text{H}$  NMR (500 MHz, Chloroform-*d*)  $\delta$  = 8.07 (t,  $^3J$  = 4.4 Hz, 1H, CHN), 3.31 (t,  $^3J$  = 6.5 Hz, 2H,  $\text{N}_3\text{CH}_2$ ), 2.56 (td,  $^3J$  = 7.1 Hz,  $^3J$  = 4.5 Hz, 2H,  $\text{CHNCH}_2$ ), 1.78-1.64 (m, 2H,  $\text{N}_3\text{CH}_2\text{CH}_2$ ), 1.19 (s, 9H,  $\text{C}(\text{CH}_3)_3$ ).  $^{13}\text{C}$  NMR (126 MHz, Chloroform-*d*)  $\delta$  = 168.8 (CHN), 56.8 ( $\text{C}(\text{CH}_3)_3$ ), 51.3 ( $\text{N}_3\text{CH}_2$ ), 35.6 ( $\text{CHN-CH}_2$ ), 28.6 ( $\text{N}_3\text{CH}_2\text{CH}_2$ ), 22.7 ( $\text{N}_3\text{CH}_2\text{CH}_2\text{CH}_2$ ),

22.5 (C(CH<sub>3</sub>)<sub>3</sub>). C<sub>9</sub>H<sub>18</sub>N<sub>4</sub>OS (230.33 g mol<sup>-1</sup>). MS(ESI): *m/z* = 253.1 (253.1 [M+Na]<sup>+</sup>). TLC: R<sub>f</sub> (EtOAc/PE, 1:2) = 0.57. IR(ATR):  $\tilde{\nu}$  [cm<sup>-1</sup>] = 2949 (CH), 2930 (CH), 2867 (CH), 2100 (N<sub>3</sub>), 1622 (C=N), 1451 (SO), 1359, 1081 (SC).

(*S,E*)-*N*-(4-Azidobutylidene)-*tert*-butylsulfonamide (**5w**)

#### 4-Azidobutane-1-ol

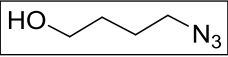 An aqueous solution of NaN<sub>3</sub> (170 mg, 2.57 mmol, 3.0 eq, 5 mL) was added in one portion to a solution of 4-iodobutane-1-ol (170 mg, 0.85 mmol, 1 equiv) in THF (5 mL). The reaction mixture was heated for 19 h to 80 °C. The solution was concentrated under reduced pressure, before it was extracted with DCM (4 × 10 mL). The combined organic layers were washed with brine and dried over Na<sub>2</sub>SO<sub>4</sub>. The title compound was isolated in pure form. The synthesis of 4-azidobutane-1-ol has been first described by Sasano, Nagasawa, Yamazaki, Shibuya, Park and Iwabuchi [41].

Colourless viscous oil, yield: 3.911 g, 33.97 mmol, 94 %. <sup>1</sup>H NMR (300 MHz, Chloroform-*d*):  $\delta$  [ppm] = 3.60 (t, <sup>3</sup>*J* = 6.4 Hz, 2H, CH<sub>2</sub>OH), 3.17 (t, <sup>3</sup>*J* = 6.9 Hz, 2H, CH<sub>2</sub>N<sub>3</sub>), 1.84-1.76 (m, 2H, CH<sub>2</sub>CH<sub>2</sub>), 1.66-1.56 (m, 2H, CH<sub>2</sub>CH<sub>2</sub>). C<sub>5</sub>H<sub>11</sub>N<sub>3</sub>O (129.16 g mol<sup>-1</sup>). IR(ATR):  $\tilde{\nu}$  [cm<sup>-1</sup>] = 3600-3200 (O-H), 2926 (CH<sub>2</sub>), 2885 (CH<sub>2</sub>), 2356-2334 (N<sub>3</sub>). C<sub>4</sub>H<sub>9</sub>N<sub>3</sub>O (115.14 g mol<sup>-1</sup>). TLC: R<sub>f</sub> (PE/EtOAc, 2:1) = 0.5.

#### 4-Azidobutanal

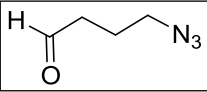 Synthesis: GP-8, reaction scale: 34 mmol of 4-azidobutanol. Purification by filtration through a pad of silica gel (PE/EtOAc, 10:1).

Slightly yellow, fluid oil, yield: quant. <sup>1</sup>H NMR (600 MHz, Chloroform-*d*)  $\delta$  = 9.74 (s, 1H, CHO), 3.55 (dd, <sup>3</sup>*J* = 7.3 Hz, <sup>3</sup>*J* = 5.4 Hz, 1H, N<sub>3</sub>CH<sub>2</sub>), 3.31 (t, <sup>3</sup>*J* = 6.6 Hz, 1H, N<sub>3</sub>CH<sub>2</sub>), 2.62 (td, <sup>3</sup>*J* = 7.0 Hz, <sup>4</sup>*J* = 1.1 Hz, 1H, N<sub>3</sub>CH<sub>2</sub>CH<sub>2</sub>CH<sub>2</sub>), 2.53 (td, <sup>3</sup>*J* = 7.0 Hz, <sup>4</sup>*J* = 1.2 Hz, 1H, N<sub>3</sub>CH<sub>2</sub>CH<sub>2</sub>CH<sub>2</sub>), 2.05 (p, <sup>3</sup>*J* = 6.7 Hz, 1H, N<sub>3</sub>CH<sub>2</sub>CH<sub>2</sub>), 1.86 (pd, <sup>3</sup>*J* = 6.8 Hz, <sup>4</sup>*J* = 1.8 Hz, 1H, N<sub>3</sub>CH<sub>2</sub>CH<sub>2</sub>). <sup>13</sup>C NMR (126 MHz, Chloroform-*d*)  $\delta$  = 201.0 (CHO), 50.7 (N<sub>3</sub>CH<sub>2</sub>), 41.0 (CH<sub>2</sub>CHO), 21.6 (N<sub>3</sub>CH<sub>2</sub>CH<sub>2</sub>). C<sub>4</sub>H<sub>7</sub>N<sub>3</sub>O (113.12 g mol<sup>-1</sup>).

(*S,E*)-*N*-(4-Azidobutylidene)-*tert*-butylsulfonamide (**5w**)

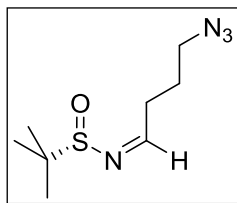

Synthesis: GP-2, reaction scale: 56.0 mmol of sulfonamide (**S**)-**1** and 60.0 mmol of 4-azidobutanal. Purification by column chromatography (PE/EtOAc, 4:1). Compound **5w** has been first described by Shu, Liu, Wang, Li and Ye [48].

Faintly green, thin oil, yield: 10.1 g, 46.9 mmol, 84 % (over two steps, referred to 4-azidobutan-1-ol).  $^1\text{H}$  NMR (500 MHz, Chloroform-*d*)  $\delta$  = 8.09 (t,  $^3J$  = 4.2 Hz, 1H, CHN), 3.38 (t,  $^3J$  = 6.8 Hz, 2H, N<sub>3</sub>CH<sub>2</sub>), 2.62 (td,  $^3J$  = 7.2 Hz,  $^3J$  = 4.9 Hz, 2H, CHNCH<sub>2</sub>), 1.94 (m, 2H, N<sub>3</sub>CH<sub>2</sub>CH<sub>2</sub>), 1.19 (s, 9H, C(CH<sub>3</sub>)<sub>3</sub>).  $^{13}\text{C}$  NMR (126 MHz, Chloroform-*d*)  $\delta$  = 168.1 (CHN), 56.8 (C(CH<sub>3</sub>)<sub>3</sub>), 50.8 (N<sub>3</sub>CH<sub>2</sub>), 33.2 (CHNCH<sub>2</sub>), 24.7 (N<sub>3</sub>CH<sub>2</sub>CH<sub>2</sub>), 22.5 (C(CH<sub>3</sub>)<sub>3</sub>). C<sub>8</sub>H<sub>16</sub>N<sub>4</sub>OS (216.30 g mol<sup>-1</sup>). MS(ESI):  $m/z$  = 239.0 (239.1 [M+Na]<sup>+</sup>). IR(ATR):  $\tilde{\nu}$  [cm<sup>-1</sup>] = 2955 (CH), 2924 (CH), 2867 (CH), 2091 (N<sub>3</sub>), 1625 (C=N), 1458 (SO), 1363, 1255, 1080 (SC). TLC:  $R_f$  (PE/EtOAc, 1:1) = 0.62,  $R_f$  (EtOAc/PE, 1:2) = 0.57.

**TMS protected propargylamines 6**

In most cases, compound **6** was not isolated. The crude product of the described synthesis was directly converted to propargylamine **7**, without further purification.

(*S*)-*N*-((*S*)-4-(Trimethylsilyl)but-3-yn-2-yl)-*tert*-butylsulfonamide (**6a**)

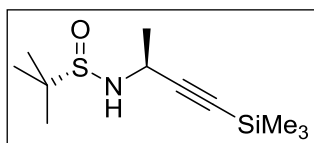

Synthesis: GP-3, reaction scale: 12.7 mmol of imine **5a**. Alkyne **6a** was not purified. The crude product was directly converted to **7a**.

$^1\text{H}$  NMR (300 MHz, Chloroform-*d*)  $\delta$  [ppm] = 4.20 (qd,  $^3J$  = 6.7 Hz,  $^3J$  = 4.5 Hz, 1H, C <sup>$\alpha$</sup> H), 3.36 (d,  $^3J$  = 4.6 Hz, 1H, NH), 1.43 (d,  $^3J$  = 6.7 Hz, 3H, CH<sub>3</sub>), 1.22 (s, 9H, C(CH<sub>3</sub>)<sub>3</sub>), 0.16 (s, 9H, Si(CH<sub>3</sub>)<sub>3</sub>). C<sub>11</sub>H<sub>23</sub>NOSSi (245.46 g mol<sup>-1</sup>). TLC:  $R_f$  (PE/EtOAc, 1:1) = 0.4.

(*S*)-*N*-((*S*)-4-Methyl-1-(trimethylsilyl)pent-1-yn-3-yl)-*tert*-butylsulfonamide (**6b**)

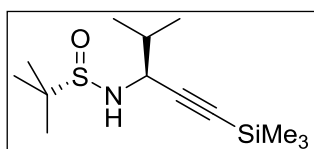

Synthesis: GP-3, reaction scale: 22.5 mmol of imine **5b**. The application of two equivalents of lithiated acetylene lead to a

decreased yield. The crude product was directly converted to form **7b** without further purification.

Brown oil,  $^1\text{H}$  NMR (600 MHz, Chloroform-*d*):  $\delta$  = 3.92 (dd,  $^3J$  = 5.3 Hz,  $^3J$  = 6.4 Hz, 1H,  $\text{NHC}^{\alpha}\text{H}$ ), 3.30 (d,  $^3J$  = 5.4 Hz, 1H,  $\text{NH}$ ), 1.92 (m, 1H,  $\text{CH}(\text{CH}_3)_2$ ), 1.22 (s, 9H,  $\text{C}(\text{CH}_3)_3$ ), 1.01 (d,  $^3J$  = 6.3 Hz, 3H,  $\text{CHCH}_3$ ), 1.00 (d,  $^3J$  = 7.5 Hz, 3H,  $\text{CHCH}_3$ ), 0.16 (s, 9H,  $\text{Si}(\text{CH}_3)_3$ ).  $\text{C}_{13}\text{H}_{27}\text{NOSSi}$  (273.51 g mol $^{-1}$ ).

(*S*)-*N*-((*S*)-5-Methyl-1-(trimethylsilyl)hex-1-yn-3-yl)-*tert*-butylsulfonamide (**6c**)

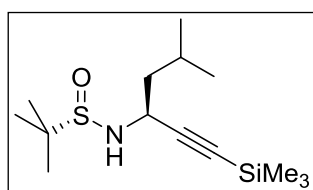

Synthesis: GP-3, reaction scale: 7.61 mmol of imine **5c**. The crude product of alkyne **6c** was directly converted to propargylamine **7c** without further purification.

Dark green oil, yield: 1.07 g, 3.73 mmol, 49 %.  $^1\text{H}$  NMR (300 MHz, Chloroform-*d*):  $\delta$  = 4.05 (td,  $^3J$  = 7.6 Hz,  $^3J$  = 6.2 Hz, 1H,  $\text{C}^{\alpha}\text{H}$ ), 3.26 (d,  $^3J$  = 6.0 Hz, 1H,  $\text{NH}$ ), 1.83 (m, 1H,  $\text{CH}(\text{CH}_3)_2$ ), 1.56 (t,  $^3J$  = 7.3 Hz, 2H,  $\text{CH}_2$ ), 1.20 (s, 9H,  $\text{C}(\text{CH}_3)_3$ ), 0.92 (d,  $^3J$  = 6.6 Hz, 3H,  $\text{CHCH}_3$ ), 0.91 (d,  $^3J$  = 6.6 Hz, 3H,  $\text{CHCH}_3$ ), 0.14 (s, 9H,  $\text{Si}(\text{CH}_3)_3$ ).  $\text{C}_{14}\text{H}_{29}\text{NOSSi}$  (287.54 g mol $^{-1}$ ). TLC:  $R_f$  (PE/EtOAc, 1:1) = 0.65.

(*S*)-*N*-((*S*)-1-Cyclohexyl-3-(trimethylsilyl)prop-2-yn-1-yl)-*tert*-butylsulfonamide (**6d**)

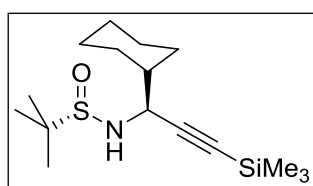

Synthesis: GP-3, reaction scale: 12.12 mmol of imine **5d**. The crude product was applied for the conversion to propargylamine **7d** without further purification.

Dark, brown, viscous oil, yield: 3.496 g, 11.15 mmol, 92 %.  $^1\text{H}$  NMR (300 MHz, Chloroform-*d*)  $\delta$  = 3.88 (dd,  $^3J$  = 5.8 Hz,  $^3J$  = 6.1 Hz, 1H,  $\text{C}^{\alpha}\text{H}$ ), 3.24 (d,  $^3J$  = 6.1 Hz, 1H,  $\text{NH}$ ), 2.37 (m, 1H, cy-1-**H**), 1.75 (dd,  $^2J$  = 11.9 Hz,  $^3J$  = 6.1 Hz, 6H, cy-2-**H**, cy-6-**H**), 1.66 (d,  $^2J$  = 11.0 Hz, 1H, cy-4-**H**), 1.55 (dd,  $^3J$  = 5.6 Hz,  $^3J$  = 4.4 Hz, 2H, cy-5-**H**, cy-3-**H**), 1.29- 1.23 (m, 2H, cy-6-**H**, cy-2-**H**), 1.22 (s, 9H,  $\text{C}(\text{CH}_3)_3$ ), 1.09 (m, 1H, cy-5-**H**), 0.88 (m, 1H, cy-3-**H**), 0.16 (s, 9H,  $\text{Si}(\text{CH}_3)_3$ ).  $\text{C}_{16}\text{H}_{31}\text{NOSSi}$  (313.57 g mol $^{-1}$ ).



(*S*)-*N*-((*S*)-4,4-Dimethyl-1-(trimethylsilyl)pent-1-yn-3-yl)-*tert*-butylsulfonamide (**6e**)

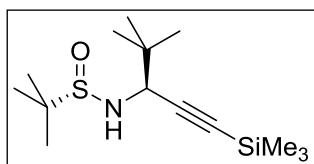

Synthesis: GP-4, reaction scale: 6.62 mmol of imine **5e**. In analogy to the preparation of compounds **7vy** and **7wy**, PPh<sub>3</sub> (2 equiv) was added in one portion to the reaction mixture at -78 °C. After 2 h, water was added and the reaction mixture warmed up to rt. The organic layer was washed with a saturated solution of NH<sub>4</sub>Cl and KHSO<sub>4</sub> (5 %). The aqueous layers were extracted with Et<sub>2</sub>O (2 × 40 mL) and the combined organic layers were washed with brine and dried over Na<sub>2</sub>SO<sub>4</sub>. The crude product was investigated by LCMS and **6e** was purified by column chromatography (EtOAc/PE, 1:10). Propargylamine **7e** could not be observed by LCMS.

Colourless crystalline solid, yield: 856 mg, 2.98 mmol, 45 %. <sup>1</sup>H NMR (500 MHz, Chloroform-*d*) δ = 3.66 (d, <sup>3</sup>*J* = 8.1 Hz, 1H, C<sup>α</sup>H), 3.19 (d, <sup>3</sup>*J* = 8.2 Hz, 1H, NH), 1.24 (s, 9H, SC(CH<sub>3</sub>)<sub>3</sub>), 0.98 (s, 9H, C<sup>α</sup>C(CH<sub>3</sub>)<sub>3</sub>), 0.16 (s, 9H, Si(CH<sub>3</sub>)<sub>3</sub>). <sup>13</sup>C NMR (126 MHz, Chloroform-*d*) δ = 104.8 (C<sup>α</sup>C≡CTMS), 90.4 (C<sup>α</sup>C≡CTMS), 58.7 (C<sup>α</sup>C(CH<sub>3</sub>)<sub>3</sub>), 56.9 (SC(CH<sub>3</sub>)<sub>3</sub>), 36.4 (C<sup>α</sup>H), 26.2 (C<sup>α</sup>C(CH<sub>3</sub>)<sub>3</sub>), 23.0 (SC(CH<sub>3</sub>)<sub>3</sub>), 0.1 (Si(CH<sub>3</sub>)<sub>3</sub>). C<sub>14</sub>H<sub>29</sub>NOSSi (287.54 g mol<sup>-1</sup>). TLC: R<sub>f</sub> (EtOAc/PE, 1:4) = 0.52.

(*S*)-*N*-((1*S*)-1-((1*r*,3*R*,5*S*)-Adamantane-1-yl)-3-(trimethylsilyl)prop-2-yn-1-yl)-*tert*-butylsulfonamide (**6f**)

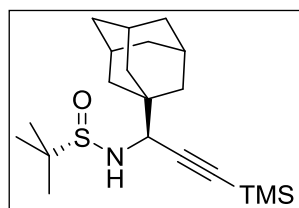

Synthesis: GP-4. Reaction scale: 1.7 mmol of imine **5f**. Compound **6f** was directly converted to the free propargylamine **7f** without further purification or investigation. C<sub>20</sub>H<sub>35</sub>NOSSi (365.65 g mol<sup>-1</sup>).

(*R*)-*N*-((*R*)-5-(Methylthio)-1-(trimethylsilyl)pent-1-yn-3-yl)-*tert*-butylsulfonamide (**6g**)

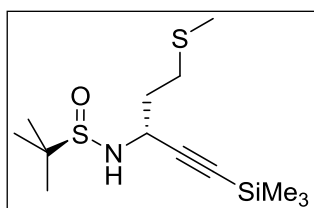

Synthesis: GP-4, reaction scale: 12.6 mmol of imine **5g**. Both stereocenters are (*R*)-configured. The crude product was not further purified after the aqueous workup. Compound **6g** was directly converted to propargylamine **7g** without further purification of the crude product.

Brown oil, yield: 2.07 g, *dr* = 96:4.  $^1\text{H}$  NMR (500 MHz, Chloroform-*d*)  $\delta$  = 4.23 (ddd,  $^3J$  = 6.1 Hz,  $^3J$  = 6.3 Hz,  $^3J$  = 6.3 Hz, 1H, C $^\alpha$ H), 3.40 (d,  $^3J$  = 5.7 Hz, 1H, NH), 2.67-2.59 (m, 2H, S-CH $_2$ ), 2.10 (s, 3H, S-CH $_3$ ), 2.05-1.93 (m, 2H, C $^\alpha$ CH $_2$ ), 1.21 (s, 9H, SC(CH $_3$ ) $_3$ ), 0.15 (s, 9H, Si(CH $_3$ ) $_3$ ). C $_{13}$ H $_{27}$ NOS $_2$ Si (305.57 g mol $^{-1}$ ).

(*S*)-*N*-((*S*)-1-Phenyl-4-(trimethylsilyl)but-3-yn-2-yl)-*tert*-butylsulfinamide (**6h**)

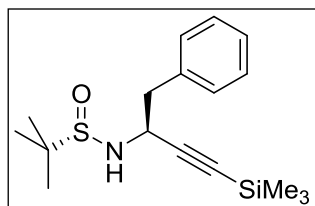

Synthesis: GP-4, reaction scale: 3.12 mmol of imine **5h**. Compound **6h** was not purified. The crude product was purified by filtration through a pad of silica (PE/EtOAc(NEt $_3$ , 85:14:1).

Yellow oil, yield: 341 mg, 1.06 mmol, 34 %. *dr* = 97:3.  $^1\text{H}$  NMR (500 MHz, Chloroform-*d*):  $\delta$  = 7.38-7.27 (m, 5H, ar-H), 4.26 (m, 1H, C $^\alpha$ H), 3.37 (d,  $^3J$  = 6.1 Hz, 1H, NH), 3.08-2.95 (m, 2H, C $^\alpha$ CH $_2$ ), 1.15 (s, 9H, SC(CH $_3$ ) $_3$ ), 0.15 (s, 9H, Si(CH $_3$ ) $_3$ ).  $^{13}\text{C}$  NMR (125 MHz, Chloroform-*d*):  $\delta$  [ppm] = 136.6 (ar-C-1), 130.1 (ar-C-3, ar-C-5), 128.4 (ar-C-2, ar-C-6), 127.0 (ar-C-4), 104.8 (TMS-C $\equiv$ C), 90.8 (TMS-C $\equiv$ C), 56.4 (SC(CH $_3$ ) $_3$ ), 49.6 (C $^\alpha$ ), 43.4 (C $^\alpha$ CH $_2$ ), 22.6 (SC(CH $_3$ ) $_3$ ), -0.10 (Si(CH $_3$ ) $_3$ ). C $_{17}$ H $_{27}$ NOSSi (321.55 g mol $^{-1}$ ). TLC:  $R_f$  (PE/EtOAc/NEt $_3$ , 85:14:1) = 0.17.

(*S*)-*N*-((*R*)-1-Phenyl-3-(trimethylsilyl)prop-2-yn-1-yl)-*tert*-butylsulfinamide (**6i**)

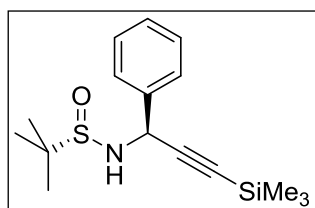

Synthesis: GP-4, reaction scale: 14.0 mmol of imine **5i**. Purification by column chromatography (PE/EtOAc/NEt $_3$ , 85:14:1).

Yellow oil, yield: 2.34 g, 7.56 mmol, 54 %. *dr* = 95:5.  $^1\text{H}$  NMR (500 MHz, Chloroform-*d*):  $\delta$  = 7.50-7.49 (m, 2H, ar-2-H, ar-6-H), 7.38-7.31 (m, 3H, ar-3-H, ar-4-H, ar-5-H), 5.24 (d,  $^3J$  = 5.2 Hz, 1H, C $^\alpha$ H), 3.68 (d,  $^3J$  = 5.2 Hz, 1H, NH), 1.20 (s, 9H, SC(CH $_3$ ) $_3$ ), 0.19 (s, 9H, Si(CH $_3$ ) $_3$ ).  $^{13}\text{C}$  NMR (125 MHz, Chloroform-*d*):  $\delta$  = 139.0 (ar-C-1), 128.7 (ar-C-3, ar-C-5), 128.4 (ar-C-2, ar-C-6), 128.0 (ar-C-4), 104.0 (C $^\alpha$ C $\equiv$ CTMS), 91.5 (C $^\alpha$ C $\equiv$ CTMS), 56.5 (SC(CH $_3$ ) $_3$ ), 51.1 (C $^\alpha$ ), 22.7 (SC(CH $_3$ ) $_3$ ), -0.1 (Si(CH $_3$ ) $_3$ ). C $_{16}$ H $_{25}$ NOSSi (307.53 g mol $^{-1}$ ). TLC:  $R_f$  (PE/EtOAc/NEt $_3$ , 85:14:1) = 0.38.

(*S*)-*N*-((*S*)-1-(Pentafluorophenyl)-3-(trimethylsilyl)prop-2-yn-1-yl)-*tert*-butylsulfonamide (**6j**)

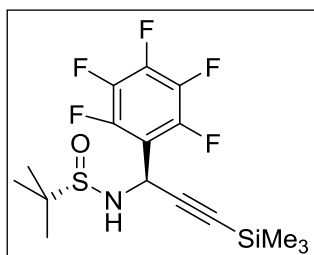

Synthesis: GP-4, reaction scale: 3.12 mmol of imine **5j**. Purification by column chromatography (PE/EtOAc, 2:1).

Colourless crystals, yield: 1.30 g, 3.28 mmol, 41 %, *dr* = 100:0.

$^1\text{H}$  NMR (500 MHz, Chloroform-*d*)  $\delta$  = 5.58 (d,  $^3J_{\text{HH}}$  = 5.3 Hz, 1H, C $^{\alpha}$ H), 3.87 (d,  $^3J_{\text{HH}}$  = 5.4 Hz, 1H, C $^{\alpha}$ NH), 1.15 (s, 9H, SC(CH $_3$ ) $_3$ ), 0.14 (s, 9H, Si(CH $_3$ ) $_3$ ).  $^{19}\text{F}$  NMR (282 MHz, Chloroform-*d*)  $\delta$  = -141.9 (dt,  $^3J_{\text{FF}}$  = 13.9 Hz,  $^4J_{\text{FF}}$  = 1.9 Hz, 2F, ar-2-F, ar-6-F), -153.4 (tt,  $^3J_{\text{FF}}$  = 21.0 Hz,  $^4J_{\text{FF}}$  = 2.1 Hz, 1F, ar-4-F), -161.0 (dd,  $^3J_{\text{FF}}$  = 20.9 Hz,  $^3J_{\text{FF}}$  = 13.8 Hz, 2F, ar-3-F, ar-5-F). C $_{16}\text{H}_{20}\text{F}_5\text{NOSSi}$  (397.48 g mol $^{-1}$ ).

(*S*)-*N*-((*R*)-1,1,1-Trifluoro-4-(trimethylsilyl)but-3-yn-2-yl)-*tert*-butylsulfonamide (**6k**)

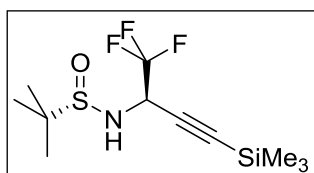

Synthesis: modified GP-4. A solution of *n*-Butyl lithium (1.6 M in *n*-hexane, 20 mL, 32 mmol, 1.5 equiv) was added dropwise to a solution of trimethylsilylethyne (3.152 g, 32.1 mmol, 1.5 equiv) in toluene at -78 °C and the solution was stirred for 2 h at the same

temperature. Afterwards, a solution of crude **5k** (21.86 mmol, 1 equiv) in toluene was added dropwise and the reaction mixture was stirred for another 2 h, before warming up to rt. A saturated aqueous solution of NH $_4$ Cl (40 mL) was added, the phases separated and the aqueous layer was extracted with Et $_2$ O (4  $\times$  75 mL). The combined organic layers were washed with brine (15 mL), dried over MgSO $_4$  and the solvent was removed under reduced pressure. The crude product was obtained in the form of a brown oil. It was filtered through a short column of silica gel with EtOAc/PE, 1:2, to yield TMS protected alkyne **6k** in pure form.

Colourless crystals, yield: 2.45 g, 8.18 mmol, 33 % (referred to sulfonamide (**S**)-**1**).  $^1\text{H}$  NMR (300 MHz, Chloroform-*d*)  $\delta$  = 4.51 (qd,  $^3J_{\text{HF}}$  = 6.4 Hz,  $^3J_{\text{HH}}$  = 7.2 Hz, 1H, C $^{\alpha}$ H), 3.82 (d,  $^3J_{\text{HH}}$  = 7.2 Hz, 1H, C $^{\alpha}$ NH), 1.20 (s, 9H, C(CH $_3$ ) $_3$ ), 0.14 (s, 9H, Si(CH $_3$ ) $_3$ ).  $^{19}\text{F}$  NMR (282 MHz, Chloroform-*d*)  $\delta$  = -75.94 (d,  $^3J_{\text{FH}}$  = 6.3 Hz, CF $_3$ ). C $_{11}\text{H}_{20}\text{F}_3\text{NOSSi}$  (299.43 g mol $^{-1}$ ). MS(ESI): *m/z* = 322.154 (322.088 [M+Na] $^+$ ). TLC: *R* $_f$  (PE/EtOAc, 2:1) = 0.61.

When hemiaminal **8k** was used instead of imine **5k**, the yield was considerably reduced to 24.2 mg, 106  $\mu\text{mol}$ , 5 %. When imine **5k** was used, and AlMe $_3$  was added as a Lewis acid, as described in GP-4, the yield was also notably decreased: 1.384 g, 0.414 mmol, 22 %.

(*S*)-*N*-((*R*)-1,1,1-Trichloro-4-(trimethylsilyl)but-3-yn-2-yl)-*tert*-butylsulfonamide (**6l**)

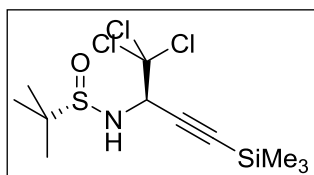

Synthesis: GP-4, reaction scale: 1.50 mmol of imine **5l**. Conversion: 68 % (Isolation of 32 % starting material). When (*S*)-**1** was used, nucleophilic attack from the *si*-face could not be observed at all. The new stereo center only formed in (*R*)-configuration. Compound

**5l** was purified by column chromatography (PE/EtOAc, 4:1).

Colourless crystals, yield: 50.6 mg, 0.15 mmol, 10 %.  $^1\text{H}$  NMR (500 MHz, Chloroform-*d*)  $\delta$  = 4.69 (d,  $^3J$  = 8.0 Hz, 1H, C $^{\alpha}$ H), 3.97 (d,  $^3J$  = 7.9 Hz, 1H, NH), 1.28 (s, 9H, SC(CH $_3$ ) $_3$ ), 0.18 (s, 9H, Si(CH $_3$ ) $_3$ ).  $^{13}\text{C}$  NMR (126 MHz, Chloroform-*d*)  $\delta$  = 101.2 (Cl $_3$ C), 98.5 (C $^{\alpha}$ C $\equiv$ CTMC), 94.7 (C $^{\alpha}$ C $\equiv$ CTMS), 65.3 (C $^{\alpha}$ ), 57.9 (SC(CH $_3$ ) $_3$ ), 22.9 (SC(CH $_3$ ) $_3$ ), -0.4 (Si(CH $_3$ ) $_3$ ). C $_{11}$ H $_{20}$ Cl $_3$ NOSSi (348.78 g mol $^{-1}$ ). MS(ESI):  $m/z$  = 243.9888 (243.9877 [C $_7$ H $_{12}$ Cl $_3$ NSi] $^+$ ). TLC: R $_f$  (PE/EtOAc, 4:1) = 0.55.

(*R*)-*N*-((*S*)-1-(Benzyloxy)-4-(trimethylsilyl)but-3-yn-2-yl)-*tert*-butylsulfonamide (**6n**)

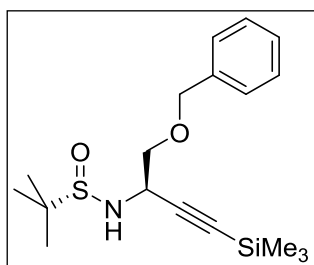

Synthesis: GP-3, reaction scale: 197  $\mu\text{mol}$  of imine **5n**. The crude product **6n** was directly converted into propargylamine **7n**, without further purification or characterization.

(*S*)-*N*-((*R*)-1-(Allyloxy)-4-(trimethylsilyl)but-3-yn-2-yl)-*tert*-butylsulfonamide (**6o**)

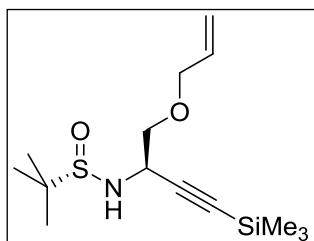

Synthesis GP-4, reaction scale: 1.58 mmol of imine **5o**. The crude product was directly converted to propargylamine **7o** without further purification. The diastereoselectivity of the reaction could be determined by  $^1\text{H}$  NMR spectroscopy of the crude product.

Dark yellow oil, yield: not determined,  $dr$  = 89:11,  $^1\text{H}$  NMR (500 MHz, Chloroform-*d*):  $\delta$  = 5.87 (m, 1H, CH=CH $_2$ ), 5.27 (dddd,  $^4J$  = 1.3 Hz,  $^4J$  = 1.6 Hz,  $^2J$  = 1.6 Hz,  $^3J$  = 17.2 Hz, 1H, C=H $_Z$ CH $_E$ ), 5.17 (dddd,  $^4J$  = 1.0 Hz,  $^4J$  = 1.6 Hz,  $^2J$  = 1.7 Hz,  $^3J$  = 10.4 Hz, 1H, C=H $_Z$ CH $_E$ ), 4.22 (m, 1H, C $^{\alpha}$ H), 4.04-4.03 (m, 2H, CH $_2$ CH=), 3.70 (d,  $^3J$  = 5.2 Hz, 1H, NH), 3.59-3.56 (m,

2H,  $\text{HC}^{\alpha}\text{CH}_2$ ), 1.20 (s, 9H,  $\text{S}(\text{C}(\text{CH}_3)_3)$ ), 0.14 (s, 9H,  $\text{Si}(\text{CH}_3)_3$ ).  $\text{C}_{14}\text{H}_{27}\text{NO}_2\text{SSi}$  (301.52  $\text{g mol}^{-1}$ ).

(*R*)-*N*-((*S*)-1-(Benzylthio)-4-(trimethylsilyl)but-3-yn-2-yl)-*tert*-butylsulfinamide (**6p**)

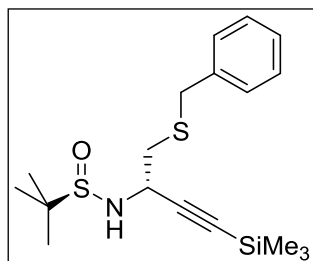

Synthesis: GP-3, reaction scale: 4.45 mmol of imine **5p**. Compound **6p** was directly converted to propargylamine **7p** without further purification or characterization.

(*S*)-*N*-((*S*)-6-Cyano-1-(trimethylsilyl)hex-1-yn-3-yl)-*tert*-butylsulfinamide (**6q**)

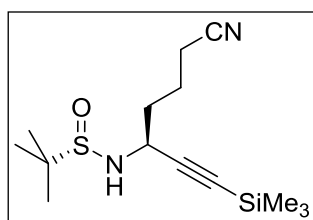

Synthesis: GP-4, reaction scale: 5.02 mmol of imine **5q**. The crude product was directly converted to propargylamine **7q** without further purification or characterization.

Dark yellow oil, yield (crude) 1.0491 g, 3.514 mmol, 70 %.  $\text{C}_{14}\text{H}_{26}\text{N}_2\text{OSSi}$  (298.52  $\text{g mol}^{-1}$ ).

*tert*-Butyl (*S*)-4-(((*S*)-*tert*-butylsulfinyl)amino)-6-(trimethylsilyl)hex-5-ynoate (**6s**)

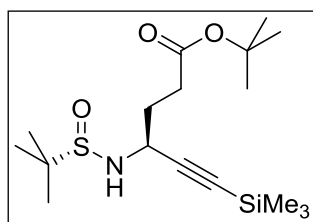

Synthesis: GP-4, reaction scale: 4.06 mmol of imine **5s**. A Lewis Acid ( $\text{AlMe}_3$ ) was left out. Isolation by fractionated filtration through a short column with silica gel. (EtOAc/PE, 10:1 – 4:1 – 2:1 – 1:1).

Colourless crystals, yield: 0.773 g, 2.15 mmol, 53 %,  $dr = 93:7$ .  $^1\text{H}$  NMR (500 MHz, Chloroform-*d*)  $\delta = 4.14$  (ddd,  $^3J = 7.4$  Hz,  $^3J = 5.9$  Hz,  $^3J = 5.9$  Hz, 1H,  $\text{C}^{\alpha}\text{H}$ ), 3.37 (d,  $^3J = 5.6$  Hz, 1H,  $\text{NH}$ ), 2.46-2.34 (m, 2H,  $\text{C}^{\alpha}\text{CH}_2\text{CH}_2$ ), 2.02 (m, 1H,  $\text{C}^{\alpha}\text{CH}_2$ ), 1.93 (ddt,  $^2J = 13.7$  Hz,  $^3J = 8.5$  Hz,  $^3J = 6.7$  Hz, 1H,  $\text{C}^{\alpha}\text{CH}_2$ ), 1.83 (ddt,  $^2J = 13.1$  Hz,  $^3J = 8.3$  Hz,  $^3J = 6.8$  Hz, 1H,  $\text{C}^{\alpha}\text{CH}_2$ ), 1.45 (s, 9H,  $\text{CO}_2\text{C}(\text{CH}_3)_3$ ), 1.22 (s, 9H,  $\text{SC}(\text{CH}_3)_3$ ), 0.17 (s, 9H,  $\text{Si}(\text{CH}_3)_3$ ).  $^{13}\text{C}$  NMR (126 MHz, Chloroform-*d*)  $\delta = 172.7$  ( $\text{CO}_2$ ), 104.1 ( $\text{CO}_2\text{CMe}_3$ ), 89.9 ( $\text{C}^{\alpha}\text{C}\equiv\text{CTMS}$ ), 80.5 ( $\text{C}^{\alpha}\text{C}\equiv\text{CTMS}$ ), 56.0 ( $\text{SC}(\text{CH}_3)_3$ ), 47.1 ( $\text{C}^{\alpha}\text{H}$ ), 31.6 ( $\text{C}^{\alpha}\text{CH}_2\text{CH}_2$ ), 28.1

(CO<sub>2</sub>C(CH<sub>3</sub>)<sub>3</sub>), 27.5 (C<sup>α</sup>CH<sub>2</sub>), 22.4 (SC(CH<sub>3</sub>)<sub>3</sub>), -0.3 (SiC(CH<sub>3</sub>)<sub>3</sub>). C<sub>17</sub>H<sub>33</sub>NO<sub>3</sub>SSi (359.60 g mol<sup>-1</sup>). MS(ESI): *m/z* = 360.479 (360.203 [M+H]<sup>+</sup>). TLC: R<sub>f</sub> (EtOAc/PE, 1:1) = 0.78.

(*S*)-*N*-((*S*)-6-((*tert*-Butyldimethylsilyl)oxy)-1-(trimethylsilyl)hex-1-yn-3-yl)-*tert*-butylsulfonamide (**6t**)

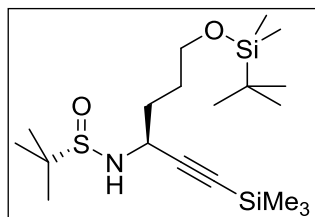

Synthesis: GP-3, reaction scale: 3.67 mmol of imine **5t**. The crude product was directly applied for the following desilylation reaction without further purification. Compound **6t** has already been described by Bauer, DiBlasi and Tan [45].

Brown oil, yield: not determined. <sup>1</sup>H NMR (500 MHz, Chloroform-*d*) δ = 4.11 (t, <sup>3</sup>*J* = 5.6 Hz, 1H, C<sup>α</sup>H), 3.64 (t, <sup>3</sup>*J* = 6.1 Hz, 2H, SiOCH<sub>2</sub>), 3.38 (d, <sup>3</sup>*J* = 5.3 Hz, 1H, C<sup>α</sup>NH), 1.81 (m, 1H, C<sup>α</sup>CH<sub>2</sub>), 1.74-1.64 (m, 2H, C<sup>α</sup>CH<sub>2</sub>, C<sup>α</sup>CH<sub>2</sub>CH<sub>2</sub>), 1.57 (m, 1H, C<sup>α</sup>CH<sub>2</sub>CH<sub>2</sub>), 1.21 (s, 9H, SC(CH<sub>3</sub>)<sub>3</sub>), 0.89 (s, 9H, SiC(CH<sub>3</sub>)<sub>3</sub>), 0.16 (s, 9H, Si(CH<sub>3</sub>)<sub>3</sub>), 0.05 (s, 6H, Si(CH<sub>3</sub>)<sub>2</sub>). C<sub>19</sub>H<sub>41</sub>NO<sub>2</sub>SSi<sub>2</sub> (403.77 g mol<sup>-1</sup>). MS(ESI): *m/z* = 404.141 (404.2469 [M+H]<sup>+</sup>).

(*R*)-*N*-((*R*)-7-Azido-1-(trimethylsilyl)hept-1-yn-3-yl)-*tert*-butylsulfonamide (**6v**)

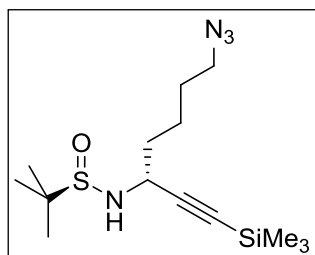

Synthesis: GP-4, reaction scale: 1.16 mmol of imine **5v**. Compound **6v** was directly converted to propargylamine **7vx** without further purification.

Yellow oil, yield not determined. <sup>1</sup>H NMR (300 MHz, Chloroform-*d*) δ = 4.08 (m, 1H, C<sup>α</sup>H), 3.37 (d, <sup>3</sup>*J* = 5.2 Hz, 1H, NH), 3.34-3.24 (m, 2H, N<sub>3</sub>CH<sub>2</sub>), 2.55 (m, 1H, C<sup>α</sup>CH<sub>2</sub>), 1.86-1.50 (m, 5H, C<sup>α</sup>CH<sub>2</sub>CH<sub>2</sub>CH<sub>2</sub>), 1.21 (s, 9H, C(CH<sub>3</sub>)<sub>3</sub>), 0.15 (s, 9H, Si(CH<sub>3</sub>)<sub>3</sub>). C<sub>14</sub>H<sub>28</sub>N<sub>4</sub>OSSi (328.55 g mol<sup>-1</sup>). MS(ESI): *m/z* = 329.085 (329.185 [M+H]<sup>+</sup>).

## Propargylamines 7

When compound **6** was not isolated, the yield of propargylamine **7** usually refers to imine **5** (2 steps, mentioned in parentheses).

### (*S*)-*N*-((*S*)-But-3-yn-2-yl)-*tert*-butylsulfonamide (**7a**)

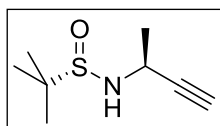

Synthesis: GP-5, starting material was the crude product of **6a**. Reaction scale: 12.7 mmol of imine **5a**. Purification by column chromatography (PE/EtOAc, 2:1 or Et<sub>2</sub>O) and recrystallization from DCM or Et<sub>2</sub>O.

Colourless, crystalline solid. Yield = 1.03 g, 5.96 mmol, 47 % (over two steps, referred to aldimine **5a**). dr: 100:0. <sup>1</sup>H NMR (500 MHz, Chloroform-*d*)  $\delta$  [ppm] = 4.16 (m, 1H, C <sup>$\alpha$</sup> H), 3.38 (d, <sup>3</sup>*J* = 4.4 Hz, 1H, NH), 2.39 (d, <sup>4</sup>*J* = 2.3 Hz, 1H, C $\equiv$ CH), 1.46 (d, <sup>3</sup>*J* = 6.8 Hz, 3H, C <sup>$\alpha$</sup> CH<sub>3</sub>), 1.21 (s, 9H, C(CH<sub>3</sub>)<sub>3</sub>). <sup>13</sup>C NMR (126 MHz, Chloroform-*d*)  $\delta$  [ppm] = 84.8 (C <sup>$\alpha$</sup> C $\equiv$ CH), 72.3 (C <sup>$\alpha$</sup> C $\equiv$ CH), 56.1 (C(CH<sub>3</sub>)<sub>3</sub>), 42.7 (C <sup>$\alpha$</sup> ), 23.3 (CH<sub>3</sub>), 22.6 (C(CH<sub>3</sub>)<sub>3</sub>). C<sub>8</sub>H<sub>15</sub>NOS (173.27 g mol<sup>-1</sup>). MS(ESI): *m/z* = 196.0757 (196.0767 [M+Na]<sup>+</sup>). de = 100 %. IR(ATR):  $\tilde{\nu}$ [cm<sup>-1</sup>] = 3725 (CH), 3706 (CH), 3623 (CH), 3595 (CH), 3212 (CH), 2946 (CH), 1125 (SO), 1024 (SC), 1014, 846, 699. [ $\alpha$ ]<sub>589</sub><sup>22</sup> = 55.15 (*c* = 0.65; CHCl<sub>3</sub>). Smp.: 43-44 °C.

### (*S*)-*N*-((*S*)-4-Methylpent-1-yn-3-yl)-*tert*-butylsulfonamide (**7b**)

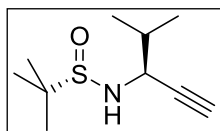

Synthesis: GP-5, starting material was the crude product of **6b**. Reaction scale: 22.5 mmol of imine **5b**. Purification by column chromatography (PE/EtOAc, 2:1) and recrystallization from Et<sub>2</sub>O or DCM.

Colourless crystalline solid, yield: 2.77 g, 13.7 mmol, 61 % (over two steps, referred to imine **5b**), *dr* = 97:3. <sup>1</sup>H NMR (Chloroform-*d*, 600 MHz):  $\delta$  = 3.89 ppm (ddd, <sup>3</sup>*J* = 7.4 Hz, <sup>3</sup>*J* = 5.2 Hz, <sup>4</sup>*J* = 2.3 Hz, 1H, C <sup>$\alpha$</sup> H), 3.31 (d, <sup>3</sup>*J* = 7.1, 1H, NH), 2.40 (d, <sup>4</sup>*J* = 2.3 Hz, 1H, C <sup>$\alpha$</sup> C $\equiv$ CH), 1.94 (m, 1H, CH(CH<sub>3</sub>)<sub>2</sub>), 1.23 (s, 9H, C(CH<sub>3</sub>)<sub>3</sub>), 1.01 (d, <sup>3</sup>*J* = 6.6 Hz, 3H, CHCH<sub>3</sub>), 1.00 (d, <sup>3</sup>*J* = 6.6 Hz, 3H, C <sup>$\alpha$</sup> HCH<sub>3</sub>). <sup>13</sup>C NMR (125 MHz, Chloroform-*d*):  $\delta$  [ppm] = 82.4 (C <sup>$\alpha$</sup> C $\equiv$ CH), 73.9 (C <sup>$\alpha$</sup> C $\equiv$ CH), 56.4 (C(CH<sub>3</sub>)<sub>3</sub>), 53.7 (C <sup>$\alpha$</sup> ), 33.6 (C <sup>$\alpha$</sup> C <sup>$\beta$</sup> H(CH<sub>3</sub>)<sub>2</sub>), 22.7 (C(CH<sub>3</sub>)<sub>3</sub>), 18.9 ((CH<sub>3</sub>)CHCH<sub>3</sub>), 17.5 ((CH<sub>3</sub>)CHCH<sub>3</sub>). C<sub>10</sub>H<sub>19</sub>NOS (201.33 g mol<sup>-1</sup>). MS(ESI): *m/z* = 425.22789 (calc. 425.22668 [2M+Na]<sup>+</sup>). TLC: R<sub>f</sub> (PE:EE 2:1) = 0.38. [ $\alpha$ ]<sub>589</sub><sup>20</sup> = 42.4 (*c* = 2.82; CHCl<sub>3</sub>). EA: C(61.083%), H(9.618%), N(6.322%), S(14.249%).

(*S*)-*N*-((*S*)-5-Methylhex-1-yn-3-yl)-*tert*-butylsulfonamide (**7c**)

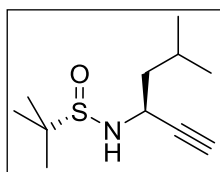

Synthesis: GP-5, starting material was the crude product of **6c**. Reaction scale: 7.81 mmol of imine **5c**. Isolation by column chromatography (EtOAc/PE, 1:2). Recrystallization from Et<sub>2</sub>O or DCM. Compound **7c** was first described by Ye, He and Zhang [29], as well as Burke, Cogan, Gao, Heim-Riether, Eugene, Ramsden, Thompson and Xiong [49].

Colourless crystalline solid, yield: 1.03 g, 4.14 mmol, 53 % (over two steps, referred to imine **5c**). *dr* = 97:3. <sup>1</sup>H NMR (300 MHz, Chloroform-*d*): δ = 4.03 (m, 1 H, C<sup>α</sup>H), 3.26 (d, <sup>3</sup>*J* = 7.5 Hz, 1 H, NH), 2.41 (d, <sup>4</sup>*J* = 2.3 Hz, 1H, C<sup>α</sup>C≡CH), 1.86 (m, 1H, (CH<sub>3</sub>)<sub>2</sub>CH), 1.59 (t, <sup>3</sup>*J* = 7.4 Hz, 2H, C<sup>α</sup>CH<sub>2</sub>), 1.21 (s, 9 H, SC(CH<sub>3</sub>)<sub>3</sub>), 0.93 (d, <sup>3</sup>*J* = 6.6 Hz, 3H, CHCH<sub>3</sub>), 0.93 (d, <sup>3</sup>*J* = 6.6 Hz, 3H, CHCH<sub>3</sub>). <sup>13</sup>C NMR (125 MHz, Chloroform-*d*): δ = 84.2 (C<sup>α</sup>C≡CH), 73.1 (C<sup>α</sup>C≡CH), 56.4 (C(CH<sub>3</sub>)<sub>3</sub>), 46.4 (C<sup>α</sup>), 46.2 (CH<sub>2</sub>), 24.9 (HC(CH<sub>3</sub>)<sub>2</sub>), 22.7 (C(CH<sub>3</sub>)<sub>3</sub>), 22.6 ((CH<sub>3</sub>)CHCH<sub>3</sub>), 22.2 ((CH<sub>3</sub>)CHCH<sub>3</sub>). C<sub>11</sub>H<sub>21</sub>NOS (215.36 g mol<sup>-1</sup>). MS(ESI): *m/z* = 453.25884 (453.25799 [2M+Na]<sup>+</sup>). [α]<sub>D</sub><sup>20</sup> = 26.1 (*c* = 1.94; CHCl<sub>3</sub>). TLC: R<sub>f</sub> (PE/EtOAc, 2:1) = 0.27. EA: C (60.703%), H (9.790%), N (6.574%), S (14.195%).

(*S*)-*N*-((*S*)-1-Cyclohexylprop-2-yn-1-yl)-*tert*-butylsulfonamide (**7d**)

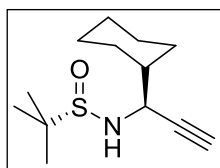

Synthesis: GP-5, starting material was the crude product of **6d**. Reaction scale: 11.1 mmol of imine **5d**. Purification by column chromatography (EtOAc/PE, 1:2). Recrystallization from EtOAc/PE (1:4). Compound **7d** has been first described by Jordan, Starks, Whatley and Turlington [50].

Colourless, crystalline solid, yield: 1.741 g, 7.212 mmol, 65 % (59 % over two steps, referred to imine **5d**). *dr* = 97:3. <sup>1</sup>H NMR (500 MHz, Chloroform-*d*) δ = 3.85 (ddd, <sup>3</sup>*J* = 7.7 Hz, <sup>3</sup>*J* = 5.7 Hz, <sup>4</sup>*J* = 2.3 Hz, 1H, C<sup>α</sup>H), 3.28 (d, <sup>3</sup>*J* = 7.5 Hz, 1H, NH), 2.41 (d, <sup>4</sup>*J* = 2.3 Hz, 1H, C<sup>α</sup>C≡CH), 1.82 (d, <sup>2</sup>*J* = 12.2 Hz, 2H, cy-2-H, cy-6-H), 1.77 (d, <sup>2</sup>*J* = 11.6 Hz, 2H, cy-3-H, cy-5-H), 1.67 (d, <sup>2</sup>*J* = 11.9 Hz, 2H, cy-4-H), 1.59 (ddd, <sup>2</sup>*J* = 11.5 Hz, <sup>3</sup>*J* = 6.0 Hz, <sup>4</sup>*J* = 3.2 Hz, 1H, cy-1-H), 1.29-1.23 (m, 2H, cy-5-H, cy-3-H), 1.22 (s, 9H, C(CH<sub>3</sub>)<sub>3</sub>), 1.15 (ddd, <sup>2</sup>*J* = 15.8 Hz, <sup>3</sup>*J* = 7.9 Hz, <sup>3</sup>*J* = 3.9 Hz, 1H, cy-6-H), 1.09 (dd, <sup>2</sup>*J* = 12.2 Hz, <sup>3</sup>*J* = 3.4 Hz, 1H, cy-2-H). <sup>13</sup>C NMR (126 MHz, Chloroform-*d*) δ = 82.9 (C<sup>α</sup>C≡CH), 73.9 (C<sup>α</sup>C≡CH), 56.5



(C(CH<sub>3</sub>)<sub>3</sub>), 53.1 (C<sup>α</sup>), 43.2 (cy-C-1), 29.4 (cy-C-3), 28.3 (cy-C-5), 26.4 (cy-C-6), 26.1 (cy-C-2), 26.0 (cy-C-4), 22.8 (C(CH<sub>3</sub>)<sub>3</sub>). C<sub>13</sub>H<sub>23</sub>NOS (241.39 g mol<sup>-1</sup>). MS(ESI): *m/z* = 264.1 (264.14 [M+Na]<sup>+</sup>). IR(ATR):  $\tilde{\nu}$ [cm<sup>-1</sup>] = 3217 (NH), 2848 (CH), 1445 (SO), 1059 (SC), 897, 674. Smp. = 59 °C. [ $\alpha$ ]<sub>589</sub><sup>20</sup> = 32.9 (*c* = 0.82; CHCl<sub>3</sub>).

(*S*)-*N*-((*S*)-4,4-Dimethylpent-1-yn-3-yl)-*tert*-butylsulfinamide (**7e**)

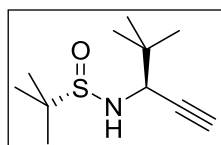

Synthesis: GP-5, starting material was the crude product of **6e**. Reaction scale: 2.98 mmol of imine **5e**. The crude product was purified by column chromatography (PE/EtOAc, 2:1) and recrystallization from EtOAc.

Compound **7e** has been first described by Burke, Cogan, Gao, Heim-Riether, Hickey, Ramsden, Thompson and Xiong [49].

Colourless crystals, yield: 577 mg, 2.68 mmol, 90 % (41 % over two steps, referred to imine **5e**), *dr* = 80:20. <sup>1</sup>H NMR (500 MHz, Chloroform-*d*)  $\delta$  = 3.66 (dd, <sup>3</sup>*J* = 9.3 Hz, <sup>4</sup>*J* = 1.7 Hz, 1H, C<sup>α</sup>H), 3.24 (d, <sup>3</sup>*J* = 9.3 Hz, 1H, NH), 2.44 (d, <sup>4</sup>*J* = 2.0 Hz, 1H, C<sup>α</sup>C≡CH), 1.24 (s, 9H, SC(CH<sub>3</sub>)<sub>3</sub>), 1.00 (s, 9H, C<sup>α</sup>C(CH<sub>3</sub>)<sub>3</sub>). <sup>13</sup>C NMR (126 MHz, Chloroform-*d*)  $\delta$  = 83.0 (C<sup>α</sup>C≡CH), 74.2 (C<sup>α</sup>C≡CH), 58.4 (C<sup>α</sup>C(CH<sub>3</sub>)<sub>3</sub>), 56.9 (SC(CH<sub>3</sub>)<sub>3</sub>), 36.2 (C<sup>α</sup>), 26.1 (C<sup>α</sup>C(CH<sub>3</sub>)<sub>3</sub>), 22.9 (SC(CH<sub>3</sub>)<sub>3</sub>). C<sub>11</sub>H<sub>21</sub>NOS (215.36 g mol<sup>-1</sup>). MS(ESI): *m/z* = 216.1434 (216.1422 [M+H]<sup>+</sup>). TLC: R<sub>f</sub>(EtOAc/PE, 1:4) = 0.08.

(*S*)-*N*-((*S*)-1-((3*S*,5*S*,7*S*)-Adamantane-1-yl)prop-2-yn-1-yl)-*tert*-butylsulfinamide (**7f**)

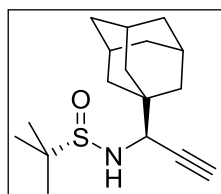

Synthesis: GP-5, starting material was the crude product of **6f**. Reaction scale: 853 μmol of imine **5f**. Purification by column chromatography (PE/EtOAc, 1:1) and recrystallization from *n*-hexane/Et<sub>2</sub>O (1:1). The formation of the undesired diastereomer could not be observed in this case (checked by NMR spectroscopy of the crude product).

Colourless, crystalline solid, yield: 37.6 mg, 128 μmol, 15 % (over 2 steps, referred to imine **5f**), *dr* = 100:0. <sup>1</sup>H NMR (500 MHz, Chloroform-*d*)  $\delta$  = 3.51 (dd, <sup>3</sup>*J* = 9.3, <sup>4</sup>*J* = 2.2 Hz, 1H,

$C^{\alpha}H$ ), 3.21 (d,  $^3J = 9.3$  Hz, 1H,  $C^{\alpha}NH$ ), 2.43 (d,  $^4J = 2.3$  Hz, 1H,  $C\equiv CH$ ), 2.01 (s, 3H,  $C^{\alpha}C(CH_2CHCH_2)_3$ ), 1.71 (d,  $^2J = 12.2$  Hz, 3H,  $C^{\alpha}C(CH_2CHCH_2)_3$ ), 1.66 (d,  $^2J = 12.4$  Hz, 3H,  $C^{\alpha}C(CH_2CHCH_2)_3$ ), 1.61 (d,  $^2J = 12.0$  Hz, 3H,  $C^{\alpha}C(CH_2CHCH_2)_3$ ), 1.55 (d,  $^2J = 11.8$  Hz, 3H,  $C^{\alpha}C(CH_2CHCH_2)_3$ ), 1.23 (s, 9H,  $SC(CH_3)_3$ ).  $^{13}C$  NMR (126 MHz, Chloroform-*d*)  $\delta = 82.1$  ( $C^{\alpha}C\equiv CH$ ), 74.6 ( $C^{\alpha}C\equiv CH$ ), 58.6 ( $C^{\alpha}$ ), 57.0 ( $SC(CH_3)_3$ ), 38.6 ( $C^{\alpha}C(CH_2CHCH_2)_3$ ), 37.6 ( $C^{\alpha}C(CH_2CHCH_2)_3$ ), 37.0 ( $C^{\alpha}C(CH_2CHCH_2)_3$ ), 28.4 ( $C^{\alpha}C(CH_2CHCH_2)_3$ ), 22.9 ( $C(CH_3)_3$ ).  $C_{17}H_{27}NOS$  (293.47 g mol $^{-1}$ ), MS(ESI):  $m/z = 294.1886$  (294.1886  $[M+H]^+$ ). TLC:  $R_f$  (EtOAc/PE, 1:1) = 0.32.  $[\alpha]_{589}^{22} = 3.45$  ( $c = 1.89$ ;  $CHCl_3$ ).

(*R*)-*N*-((*R*)-5-(Methylthio)pent-1-yn-3-yl)-*tert*-butylsulfonamide (**7g**)

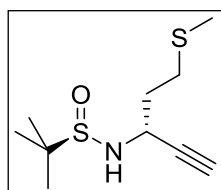

Synthesis: GP-6, starting material was the crude product of **6g**. Reaction scale: 12.6 mmol of imine **5g**. Both stereocenters are (*R*)-configured. Purification by column chromatography (EtOAc/PE, 1:2).

Highly viscous, colourless oil, yield: 999 mg, 4.284 mmol, 34 % (over two steps, referred to imine **5g**)  $dr = 96:4$ .  $^1H$  NMR (500 MHz, Chloroform-*d*)  $\delta = 4.23$  (m, 1H,  $C^{\alpha}H$ ), 3.59 (d,  $^3J = 7.2$  Hz, 1H,  $NH$ ), 2.72- 2.62 (m, 2H,  $(CH_3)SCH_2$ ), 2.46 (d,  $^4J = 2.3$  Hz, 1H,  $C^{\alpha}C\equiv CH$ ), 2.11 (s, 3H,  $SCH_3$ ), 2.04 (dd,  $^2J = 14.4$  Hz,  $^3J = 3.0$  Hz, 2H,  $C^{\alpha}CH_2$ ), 2.01 (dd,  $^2J = 14.3$  Hz,  $^3J = 3.2$  Hz, 2H,  $C^{\alpha}CH_2$ ), 1.23 (s, 9H,  $SC(CH_3)_3$ ).  $^{13}C$  NMR (126 MHz, Chloroform-*d*)  $\delta = 83.1$  ( $C^{\alpha}C\equiv CH$ ), 73.7 ( $C^{\alpha}C\equiv CH$ ), 56.4 ( $SC(CH_3)_3$ ), 46.6 ( $C^{\alpha}$ ), 35.9 ( $C^{\alpha}HCH_2$ ), 30.0 ( $(CH_3)SCH_2$ ), 22.6 ( $SC(CH_3)_3$ ), 15.5 ( $SCH_3$ ).  $C_{10}H_{19}NOS_2$  (233.39 g mol $^{-1}$ ). MS(ESI):  $m/z = 256.0798$  (256.0800  $[M+Na]^+$ ). IR(ATR):  $\tilde{\nu}[cm^{-1}] = 3208$  (NH), 2958 (CH), 2917 (CH), 2863 (CH), 1736 (SO), 1648 (CSC), 1546 (SC), 1477, 1454, 1432, 1363, 1315, 1264, 1223, 1176, 1059, 936, 669, 647.  $[\alpha]_{589}^{20} = -54.84$  ( $c = 0.46$ ;  $CHCl_3$ ). TLC:  $R_f$  (PE/EtOAc, 2:1) = 0.14.

(*S*)-*N*-[(*S*)-1-Phenylbut-3-yn-2-yl]-*tert*-butylsulfonamide (**7h**)

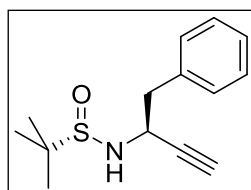

Synthesis: GP-5, starting material was the crude product of **6h**. Reaction scale: 1.52 mmol of imine **5h**. Purification by column chromatography (PE/EtOAc, 2:1). Compound **7h** was first described by Burke, Cogan, Gao, Heim-Riether, Hickey, Ramsden, Thompson, Xiong [49].

Yellow oil, yield: 249 mg, 1.00 mmol, 35 % (when the crude material of **6h** was used in this conversion, the yield was decreased to 234 mg, 938  $\mu$ mol, 15 % over two steps, ref. to imine **5h**). *dr* = 97:3.  $^1\text{H}$  NMR (500 MHz, Chloroform-*d*):  $\delta$  = 7.33-7.29 (m, 2H, ar-2-**H**, ar-6-**H**), 7.27-7.25 (m, 3H, ar-3-**H**, ar-4-**H**, ar-5-**H**), 4.27 (m, 1H, C $^{\alpha}$ **H**), 3.36 (d,  $^3J$  = 7.2 Hz, 1H, NH), 3.07-3.00 (m, 2H, C $^{\alpha}$ **CH**<sub>2</sub>), 2.45 (d,  $^4J$  = 2.3 Hz, 1H, C $\equiv$ **CH**), 1.14 (s, 9H, SC(**CH**<sub>3</sub>)<sub>3</sub>).  $^{13}\text{C}$  NMR (125 MHz, Chloroform-*d*):  $\delta$  = 136.4 (ar-**C**-1), 130.0 (ar-**C**-3, ar-**C**-5), 128.5 (ar-**C**-2, ar-**C**-6), 127.2 (ar-**C**-4), 83.2 (C $^{\alpha}$ **C** $\equiv$ **CH**), 74.3 (C $^{\alpha}$ **C** $\equiv$ **CH**), 56.5 (SC(**CH**<sub>3</sub>)<sub>3</sub>), 49.0 (C $^{\alpha}$ ), 43.3 (C $^{\alpha}$ **CH**<sub>2</sub>), 22.6 (SC(**CH**<sub>3</sub>)<sub>3</sub>). C<sub>14</sub>H<sub>19</sub>NOS (249.37 g mol<sup>-1</sup>). MS(ESI): *m/z* = 250.0 (250.13 [M+H]<sup>+</sup>). TLC: R<sub>f</sub> (PE/EtOAc, 2:1) = 0.14.  $[\alpha]_{589}^{20}$  = 18.6 (*c* = 1.0; CHCl<sub>3</sub>).

(*S*)-*N*-((*R*)-1-Phenylprop-2-yn-1-yl)-*tert*-butylsulfinamide (**7i**)

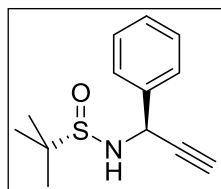

Synthesis: GP-7, starting material was the crude product of **6i**. Reaction scale: 8.30 mmol of imine **5i**. Purification by column chromatography (PE/EtOAc, 2:1). Recrystallization from Et<sub>2</sub>O. Compound **7i** has been first described by Verrier, Carret, Poisson [51] and Jordan, Starks, Whatley, Turlington [50].

Yellow solid, yield: 1.29 g, 5.48 mmol, 66 % (36 % over two steps, referred to imine **5i**), *dr* = 95:5.  $^1\text{H}$  NMR (500 MHz, Chloroform-*d*):  $\delta$  [ppm] = 7.52-7.50 (m, 2H, ar-2-**H**, ar-6-**H**), 7.38-7.33 (m, 3H, ar-3-**H**, ar-4-**H**, ar-5-**H**), 5.22 (dd,  $^3J$  = 6.5 Hz,  $^4J$  = 2.4 Hz, 1H, C $^{\alpha}$ **H**), 3.75 (d,  $^3J$  = 6.4 Hz, 1H, NH), 2.64 (d,  $^4J$  = 2.4 Hz, 1H, C $\equiv$ **CH**), 1.21 (s, 9H, S(C(**CH**<sub>3</sub>)<sub>3</sub>)).  $^{13}\text{C}$  NMR (125 MHz, Chloroform-*d*):  $\delta$  [ppm] = 138.5 (ar-**C**-1), 128.8 (ar-**C**-2, ar-**C**-6), 128.6 (ar-**C**-3, ar-**C**-5), 127.8 (ar-**C**-4), 82.6 (HC $\equiv$ CC $^{\alpha}$ ), 75.1 (HC $\equiv$ CC $^{\alpha}$ ), 56.6 (SC(**CH**<sub>3</sub>)<sub>3</sub>), 50.8 (NHC $^{\alpha}$ ), 22.7 (SC(**CH**<sub>3</sub>)<sub>3</sub>). C<sub>13</sub>H<sub>17</sub>NOS (235.35 g mol<sup>-1</sup>). MS(ESI): *m/z* = 493.19639 (493.19539 [2M+Na]<sup>+</sup>), TLC: R<sub>f</sub> (PE/EtOAc, 2:1) = 0.19.  $[\alpha]_{589}^{20}$  = 17.4 (*c* = 0.5; CHCl<sub>3</sub>).

(*S*)-*N*-((*R*)-1-(Pentafluorophenyl)prop-2-yn-1-yl)-*tert*-butylsulfinamide (**7j**)

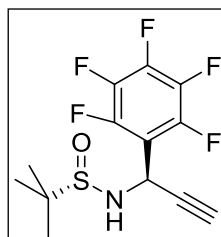

Synthesis: GP-6, starting material was the crude product of **6j**. Reaction scale: 3.12 mmol of imine **5j**. Purification by column chromatography (PE/EtOAc, 2:1). Recrystallization from EtOAc/PE, 1:8.

Colourless crystals, yield: 0.53 g, 1.62 mmol, 52 % (21 % over two steps,

referred to imine **5j**).  $dr = 100:0$ .  $^1\text{H}$  NMR (600 MHz, Chloroform-*d*)  $\delta = 5.55$  (d,  $^3J_{HH} = 5.3$  Hz, 1H, C<sup>*o*</sup>H), 4.01 (d,  $^3J_{HH} = 5.4$  Hz, 1H, C<sup>*o*</sup>NH), 2.56 (d,  $^4J_{HH} = 2.5$  Hz, 1H, C $\equiv$ CH), 1.13 (s, 9H, SC(CH<sub>3</sub>)<sub>3</sub>).  $^{19}\text{F}$  NMR (565 MHz, Chloroform-*d*)  $\delta = -142.0$  (td,  $^3J_{FF} = 21.3$  Hz,  $^4J_{FF} = 7.7$  Hz, 2F, ar-3-F, ar-5-F), -153.3 (t,  $^3J_{FF} = 18.9$  Hz, 1F, ar-4-F), -161.0 (t,  $^3J_{FF} = 7.3$  Hz, 2F, ar-2-F, ar-6-F).  $^{13}\text{C}$  NMR (151 MHz, Chloroform-*d*)  $\delta = 144.7$  (ddt,  $^1J_{CF} = 251.2$  Hz,  $^2J_{CF} = 8.1$  Hz,  $^3J_{CF} = 3.9$  Hz, ar-C-3, ar-C-5), 141.5 (d,  $^1J_{CF} = 256.1$  Hz, ar-C-4), 137.7 (dt,  $^1J_{CF} = 252$  Hz,  $^2J_{CF} = 15.8$  Hz, ar-C-2, ar-C-6), 113.4 (td,  $^2J_{CF} = 14.8$  Hz,  $^3J_{CF} = 3.6$  Hz, ar-C-1), 79.2 (C<sup>*o*</sup>C $\equiv$ CH), 74.5 (C<sup>*o*</sup>C $\equiv$ CH), 56.7 (C(CH<sub>3</sub>)<sub>3</sub>), 40.9 (C<sup>*o*</sup>), 22.3 (C(CH<sub>3</sub>)<sub>3</sub>). C<sub>13</sub>H<sub>12</sub>F<sub>5</sub>NOS (325.28 g mol<sup>-1</sup>). MS(ESI):  $m/z = 348.0470$  (348.0457 [M+Na]<sup>+</sup>).  $[\alpha]_{589}^{23} = 38.8$  ( $c = 0.53$ ; CHCl<sub>3</sub>). TLC:  $R_f$  (PE/EtOAc, 2:1) = 0.32. IR(ATR):  $\tilde{\nu}$  [cm<sup>-1</sup>] = 3306 (NH), 3208 ( $\equiv$ C-H), 2958 (-CH<sub>3</sub>), 2356-2331 (-C $\equiv$ C-), 1524-1498 (ar, C=C), 1074 (S=O).

(*S*)-*N*-((*R*)-1,1,1-Trifluorobut-3-yn-2-yl)-*tert*-butylsulfonamide (**7k**)

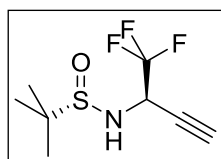

Synthesis: GP-6, starting material was the crude product of **6k**. Reaction scale: 7.21 mmol of imine **5k**. The crude product was washed with pentane and then either purified by column chromatography (EtOAc/PE, 1:2 to 1:1) or by recrystallization from DCM/*n*-hexane (1:1).

Colourless crystals, yield: 474.6 mg, 2.088 mmol, 29 %, (25 % over two steps, referred to sulfonamide (*S*)-**1**)  $dr = 93:7$ .  $^1\text{H}$  NMR (600 MHz, Chloroform-*d*)  $\delta = 4.55$  (dq,  $^3J_{HH} = 7.7$  Hz,  $^3J_{HF} = 6.3$  Hz,  $^4J_{HH} = 2.5$  Hz, 1H, C<sup>*o*</sup>H), 3.68 (d,  $^3J_{HH} = 8.0$  Hz, 1H, C<sup>*o*</sup>NH), 2.62 (d,  $^4J_{HH} = 2.5$  Hz, 1H, C<sup>*o*</sup>C $\equiv$ CH), 1.26 (s, 9H, C(CH<sub>3</sub>)<sub>3</sub>).  $^{19}\text{F}$  NMR (565 MHz, Chloroform-*d*)  $\delta = -76.51$  (d,  $^3J_{FH} = 6.2$  Hz, CF<sub>3</sub>).  $^{13}\text{C}$  NMR (75 MHz, Chloroform-*d*)  $\delta = 122.9$  (q,  $^1J_{CF} = 281.2$  Hz, CF<sub>3</sub>), 78.0 (C $\equiv$ CH), 73.7 (q,  $^3J_{CF} = 2.3$  Hz, C $\equiv$ CH), 57.0 (C(CH<sub>3</sub>)<sub>3</sub>), 49.6 (q,  $^2J_{CF} = 35.0$  Hz, C<sup>*o*</sup>), 22.4 (C(CH<sub>3</sub>)<sub>3</sub>). C<sub>8</sub>H<sub>12</sub>F<sub>3</sub>NOS (227.25 g mol<sup>-1</sup>). MS(ESI):  $m/z = 250.0493$  (250.0484 [M+Na]<sup>+</sup>). TLC:  $R_f$  (EtOAc/PE, 2:7) = 0.27. Smp = 83.7 °C.  $[\alpha]_{589}^{22} = 52.1$  ( $c = 0.97$ ; DCM).

When GP-5 was applied, a far lower yield of propargylamine **7k** was achieved: 24.2 mg, 0.11 mmol, 10 %. When the crude product of **6k** was not purified, but instantly converted by GP-6, the total yield of the whole synthesis could be increased to 1.197 g, 5.267 mmol, 25 % (referred to the chiral sulfonamide (*S*)-**1**, 3 steps).

(*S*)-*N*-((*R*)-1,1,1-Trichlorobut-3-yn-2-yl)-*tert*-butylsulfonamide (**7l**)

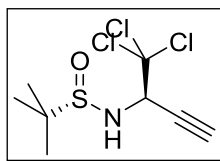

Synthesis: GP-6, starting material was the crude product of **6l**. Reaction scale: 149  $\mu\text{mol}$  of imine **5l**. Reaction was monitored by TLC. Purification by column chromatography (PE/EtOAc, 2:1).

Colourless crystals, yield: 23.5 mg, 85  $\mu\text{mol}$ , 57 % (6 % over two steps, referred to imine **5l**).  $dr = 100:0$ .  $^1\text{H}$  NMR (500 MHz, Chloroform-*d*)  $\delta = 4.71$  (dd,  $^3J = 8.6$  Hz,  $^4J = 2.3$  Hz, 1H,  $\text{C}^\alpha\text{H}$ ), 4.05 (d,  $^3J = 8.7$  Hz, 1H, NH), 2.72 (d,  $^4J = 2.3$  Hz, 1H,  $\text{C}\equiv\text{CH}$ ), 1.29 (s, 9H,  $\text{SC}(\text{CH}_3)_3$ ).  $^{13}\text{C}$  NMR (126 MHz, Chloroform-*d*)  $\delta = 100.6$  ( $\text{CCl}_3$ ), 77.9 ( $\text{C}^\alpha\text{C}\equiv\text{CH}$ ), 77.4 ( $\text{C}^\alpha\text{C}\equiv\text{CH}$ ), 65.0 ( $\text{C}^\alpha$ ), 58.0 ( $\text{C}(\text{CH}_3)_3$ ), 22.8 ( $\text{C}(\text{CH}_3)_3$ ).  $\text{C}_8\text{H}_{12}\text{Cl}_3\text{NOS}$  (276.60  $\text{g mol}^{-1}$ ). MS(ESI):  $m/z = 275.9771$  (275.9778  $[\text{M}+\text{H}]^+$ ). TLC:  $R_f(\text{EtOAc/PE}, 1:2) = 0.27$ .  $[\alpha]_{589}^{22} = 15.0$  ( $c = 0.59$ ;  $\text{CHCl}_3$ ). IR(ATR):  $\tilde{\nu} [\text{cm}^{-1}] = 3281$  (NH), 3196 (CH), 3196 ( $\equiv\text{C-H}$ ), 2360 ( $-\text{C}\equiv\text{C}-$ ), 1068 (S=O), 869, 802, 685.

(*R*)-*N*-((*S*)-1-(Benzyloxy)but-3-yn-2-yl)-*tert*-butylsulfonamide (**7n**)

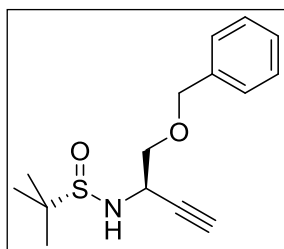

Synthesis: GP-5, starting material was the crude product of **6n**. Reaction scale: 197  $\mu\text{mol}$  of imine **5n**. Purification by column chromatography (EtOAc/PE, 1:4).

Yellow oil, yield: 17 mg, 61  $\mu\text{mol}$ , 31 % (over two steps, referred to imine **5n**),  $dr = 95:5$ .  $^1\text{H}$  NMR (500 MHz, Chloroform-*d*)  $\delta = 7.36$ -7.27 (m, 5H, ar-H), 4.64 (d,  $^2J = 12.0$  Hz, 1H,  $\text{C}^\alpha\text{CH}_2$ ), 4.57 (d,  $^2J = 12.1$  Hz, 1H,  $\text{C}^\alpha\text{CH}_2$ ), 4.24 (m, 1H,  $\text{C}^\alpha$ ), 3.75 (d,  $^3J = 6.4$  Hz, 1H,  $\text{C}^\alpha\text{NH}$ ), 3.65 (dd,  $^3J = 5.6$  Hz,  $^4J = 1.3$  Hz, 2H,  $\text{PhCH}_2$ ), 2.45 (d,  $^4J = 2.4$  Hz, 1H,  $\text{C}\equiv\text{CH}$ ), 1.21 (s, 9H,  $\text{C}(\text{CH}_3)_3$ ).  $^{13}\text{C}$  NMR (126 MHz, Chloroform-*d*)  $\delta = 137.7$  (ar-C-1), 128.6 (ar-C-3, ar-C-5), 128.0 (ar-C-4), 127.9 (ar-C-2, ar-C-6), 81.1 ( $\text{C}^\alpha\text{C}\equiv\text{CH}$ ), 74.2 ( $\text{C}^\alpha\text{C}\equiv\text{CH}$ ), 73.5 ( $\text{C}^\alpha\text{CH}_2$ ), 73.2 ( $\text{PhCH}_2$ ), 56.5 ( $\text{SC}(\text{CH}_3)_3$ ), 47.5 ( $\text{C}^\alpha$ ), 22.7 ( $\text{SC}(\text{CH}_3)_3$ ).  $\text{C}_{15}\text{H}_{21}\text{NO}_2\text{S}$  (279.40  $\text{g mol}^{-1}$ ). TLC:  $R_f(\text{EtOAc/PE}, 1:4) = 0.13$ .

(*S*)-*N*-((*R*)-1-(Allyloxy)but-3-yn-2-yl)-*tert*-butylsulfonamide (**7o**)

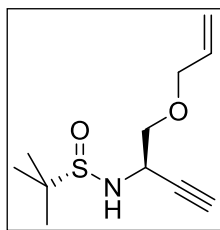

Synthesis: GP-5, starting material was the crude product of **6o**. Reaction scale: 1.58 mmol of imine **5o**. Purification by column chromatography (PE/EtOAc, 2:1 or DCM/MeOH, 98:2).

Yellow oil, yield: 149 mg, 490  $\mu$ mol, 31 % (over two steps, referred to imine **5o**). *dr* = 93:7.  $^1\text{H}$  NMR (500 MHz, Chloroform-*d*):  $\delta$  = 5.86 (m, 1H,  $\text{CH}=\text{CH}_2$ ), 5.27 (dddd,  $^4J$  = 1.4 Hz,  $^4J$  = 1.5 Hz,  $^2J$  = 1.5 Hz,  $^3J$  = 17.2 Hz, 1H,  $\text{C}=\text{H}_Z\text{CH}_E$ ), 5.18 (dddd,  $^4J$  = 1.4 Hz,  $^4J$  = 1.4 Hz,  $^2J$  = 1.5 Hz,  $^3J$  = 10.4 Hz, 1H,  $\text{C}=\text{H}_Z\text{CH}_E$ ), 4.18 (m, 1H,  $\text{NHC}^a\text{H}$ ), 4.04 (m, 2H,  $\text{CH}_2-\text{CH}=\text{CH}_2$ ), 3.72 (d,  $^3J$  = 6.4 Hz, 1H,  $\text{NH}$ ), 3.58-3.57 (m, 2H,  $\text{HC}^a\text{CH}_2$ ), 2.42 (d,  $^4J$  = 2.4 Hz, 1H,  $\text{C}\equiv\text{CH}$ ), 1.20 (s, 9H,  $\text{SC}(\text{CH}_3)_3$ ).  $^{13}\text{C}$  NMR (125 MHz, Chloroform-*d*):  $\delta$  = 134.2 ( $\text{CH}=\text{CH}_2$ ), 117.6 ( $\text{CH}=\text{CH}_2$ ), 81.0 ( $\text{HC}\equiv\text{CC}^a$ ), 74.1 ( $\text{HC}\equiv\text{CC}^a$ ), 73.1 ( $\text{C}^a\text{HCH}_2$ ), 72.3 ( $\text{OCH}_2\text{CH}=\text{CH}_2$ ), 56.4 ( $\text{SC}(\text{CH}_3)_3$ ), 47.4 ( $\text{C}^a$ ), 22.6 ( $\text{SC}(\text{CH}_3)_3$ ).  $\text{C}_{11}\text{H}_{19}\text{NO}_2\text{S}$  (229.34  $\text{g mol}^{-1}$ ). MS(ESI):  $m/z$  = 252.0 (252.33  $[\text{M}+\text{Na}]^+$ ).  $[\alpha]_{589}^{20}$  = 36.3 ( $c$  = 0.99;  $\text{CHCl}_3$ ). TLC:  $R_f$  (DCM/MeOH, 50:1) = 0.17.

(*R*)-*N*-((*S*)-1-(Benzylthio)but-3-yn-2-yl)-*tert*-butylsulfonamide (**7p**)

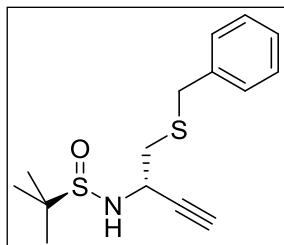

Synthesis: GP-5, starting material was the crude product of **6p**. Reaction scale: 4.45 mmol of imine **5p**. Purification by preparative HPLC.

Brown oil, yield: 57.2 mg, 194  $\mu$ mol, 4 % (over two steps, referred to imine **5p**). *dr* = 93:7.  $^1\text{H}$  NMR (300 MHz, Chloroform-*d*)  $\delta$  = 7.39-7.22 (m, 5H,  $\text{arCH}$ ), 4.13 (m, 1H,  $\text{C}^a\text{H}$ ), 3.84 (s, 2H,  $\text{SCH}_2\text{Ph}$ ), 3.81-3.77 (m, 1H,  $\text{NH}$ ), 2.82 (dd,  $^2J$  = 13.9 Hz,  $^4J$  = 6.3 Hz, 1H,  $\text{C}^a\text{HCH}_2$ ), 2.74 (dd,  $^2J$  = 13.8 Hz,  $^3J$  = 6.2 Hz, 1H,  $\text{C}^a\text{HCH}_2$ ), 2.50 (d,  $^4J$  = 2.3 Hz, 1H,  $\text{C}^a\text{C}\equiv\text{CH}$ ), 1.22 (s, 9H,  $\text{SC}(\text{CH}_3)_3$ ).  $^{13}\text{C}$  NMR (151 MHz, Chloroform-*d*)  $\delta$  = 137.9 ( $\text{ar-C-1}$ ), 129.1 ( $\text{ar-C-2}$ ,  $\text{ar-C-6}$ ), 128.7 ( $\text{ar-C-3}$ ,  $\text{ar-C-5}$ ), 127.3 ( $\text{ar-C-4}$ ), 82.7 ( $\text{C}^a\text{C}\equiv\text{CH}$ ), 74.1 ( $\text{C}^a\text{C}\equiv\text{CH}$ ), 56.6 ( $\text{SC}(\text{CH}_3)_3$ ), 47.3 ( $\text{C}^a$ ), 38.3 ( $\text{C}^a\text{HCH}_2$ ), 36.9 ( $\text{SCH}_2\text{Ph}$ ), 22.6 ( $\text{SC}(\text{CH}_3)_3$ ).  $\text{C}_{15}\text{H}_{21}\text{NOS}_2$  (295.46  $\text{g mol}^{-1}$ ), MS(ESI):  $m/z$  = 317.98 (318.10  $[\text{M}+\text{Na}]^+$ ).  $[\alpha]_{589}^{22}$  = -56.1 ( $c$  = 0.19;  $\text{CHCl}_3$ ). IR(ATR):  $\bar{\nu}$  [ $\text{cm}^{-1}$ ] = 3218 (NH), 2958 (CH), 2335 ( $\text{C}\equiv\text{C}$ ).

(*S*)-*N*-((*S*)-6-Cyanohe-1-yn-3-yl)-*tert*-butylsulfonamide (**7q**)

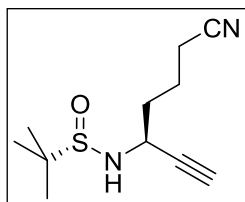

Synthesis: GP-6, starting material was the crude product of **6q**. Reaction scale: 3.53 mmol of imine **5q**. Purification by column chromatography (EtOAc/PE, 1:2).

Yellow crystals, yield: 0.344 g, 1.52 mmol, 43 % (30 % over two steps, referred to imine **5q**). *dr* = 95:5. <sup>1</sup>H NMR (500 MHz, Chloroform-*d*):  $\delta$  = 4.11 (m, 1H, C <sup>$\alpha$</sup> H), 3.36 (d, <sup>3</sup>*J* = 6.1 Hz, 1H, NH), 2.46 (d, <sup>4</sup>*J* = 2.3 Hz, 1H, C $\equiv$ CH), 2.42 (t, <sup>3</sup>*J* = 6.4 Hz, 2H, CH<sub>2</sub>CN), 1.83-1.95 (m, 4H, CHNCH<sub>2</sub>CH<sub>2</sub>), 1.23 (s, 9H, C(CH<sub>3</sub>)<sub>3</sub>). <sup>13</sup>C NMR (126 MHz, Chloroform-*d*):  $\delta$  = 77.1 (HC $\equiv$ CC <sup>$\alpha$</sup> ), 74.2 (HC $\equiv$ CC <sup>$\alpha$</sup> ), 56.5 (C(CH<sub>3</sub>)<sub>3</sub>), 46.7 (C <sup>$\alpha$</sup> HNH), 35.5 (CHNCH<sub>2</sub>CH<sub>2</sub>), 22.7 (C(CH<sub>3</sub>)<sub>3</sub>), 21.6 (CHNCH<sub>2</sub>CH<sub>2</sub>), 17.1 (CH<sub>2</sub>CN). C<sub>11</sub>H<sub>18</sub>N<sub>2</sub>OS (226.34 g mol<sup>-1</sup>). MS(ESI): *m/z* = 249.1026 (249.1032 [M+Na]<sup>+</sup>). TLC: R<sub>f</sub> (EtOAc/PE, 1:2) = 0.33. [ $\alpha$ ]<sub>589</sub><sup>20</sup> = 63.4 (*c* = 0.84; CHCl<sub>3</sub>). IR(ATR):  $\tilde{\nu}$  [cm<sup>-1</sup>] = 3250 (NH), 2955 (CH), 2930 (CH), 2867 (CH), 2360 (C $\equiv$ C), 2335 (C $\equiv$ C), 2240, 1458 (CN), 1423, 1363, 1182, 1059, 878, 647.

*tert*-Butyl-(*S*)-4-(((*S*)-*tert*-butylsulfinyl)amino)hex-5-ynoate (**7s**)

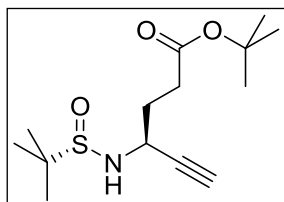

Synthesis: GP-6, starting material was the crude product of **6s**. Reaction scale: 4.04 mmol of imine **5s**. Purification by column chromatography (EtOAc/PE, 1:1).

Colourless crystals, yield: 0.54 g, 1.9 mmol, 47 % (25 % over two steps, referred to imine **5s**). *dr* = 93:7. <sup>1</sup>H NMR (500 MHz, Chloroform-*d*)  $\delta$  = 4.06 (qd, <sup>3</sup>*J* = 6.9 Hz, <sup>4</sup>*J* = 2.2 Hz, 1H, C <sup>$\alpha$</sup> H), 3.47 (d, <sup>3</sup>*J* = 7.0 Hz, 1H, NH), 2.40 (d, <sup>4</sup>*J* = 2.4 Hz, 1H, C <sup>$\alpha$</sup> C $\equiv$ CH), 2.40- 2.30 (m, 2H, CO<sub>2</sub>CH<sub>2</sub>), 2.04-1.87 (m, 2H, C <sup>$\alpha$</sup> CH<sub>2</sub>), 1.39 (s, 9H, CO<sub>2</sub>C(CH<sub>3</sub>)<sub>3</sub>), 1.17 (s, 9H, SC(CH<sub>3</sub>)<sub>3</sub>). <sup>13</sup>C NMR (126 MHz, Chloroform-*d*)  $\delta$  = 172.1 (CO<sub>2</sub>), 83.0 (C <sup>$\alpha$</sup> C $\equiv$ CH), 80.7 (CO<sub>2</sub>C(CH<sub>3</sub>)<sub>3</sub>), 73.7 (C <sup>$\alpha$</sup> C $\equiv$ CH), 56.3 (SC(CH<sub>3</sub>)<sub>3</sub>), 46.8 (C <sup>$\alpha$</sup> ), 31.9 (C <sup>$\alpha$</sup> CH<sub>2</sub>), 31.4 (CO<sub>2</sub>CH<sub>2</sub>), 28.1 (CO<sub>2</sub>C(CH<sub>3</sub>)<sub>3</sub>), 22.6 (SC(CH<sub>3</sub>)<sub>3</sub>). C<sub>14</sub>H<sub>25</sub>NO<sub>3</sub>S (287.42 g mol<sup>-1</sup>), MS(ESI): *m/z* = 288.1635 (288.16279 [M+H]<sup>+</sup>). [ $\alpha$ ]<sub>589</sub><sup>22</sup> (*c* = 0.16; CHCl<sub>3</sub>) = 33.27°. TLC: R<sub>f</sub>(PE/EtOAc, 1:1) = 0.46.

(*S*)-*N*-((*S*)-6-Hydroxyhex-1-yn-3-yl)-*tert*-butylsulfonamide (**7t**)

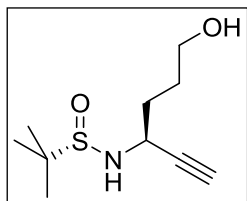

Synthesis: GP-5, starting material was the crude product of **6t**. Reaction scale: 3.67 mmol of imine **5t**. 6 eq of TBAF were used. Reaction was carried out for 2 h at 0 °C. Purification by column chromatography (EtOAc). Compound **7t** has already been described by Bauer, DiBlasi and Tan [45]. X-ray crystal structure analysis has been performed before by Hou et al. [14].

Colourless crystals, yield: 215.1 mg, 989.7  $\mu$ mol, 27 % (over two steps, referred to aldimine **5t**). *dr* = 93:7.  $^1\text{H}$  NMR (500 MHz, Chloroform-*d*)  $\delta$  = 3.99 (m, 1H,  $\text{C}^\alpha\text{H}$ ), 3.80 (d,  $^3J$  = 6.8 Hz, 1H,  $\text{C}^\alpha\text{NH}$ ), 3.56 (t,  $^3J$  = 6.2 Hz, 2H,  $\text{CH}_2\text{OH}$ ), 3.37 (s, 1H, OH), 2.39 (d,  $^4J$  = 2.3 Hz, 1H,  $\text{C}\equiv\text{CH}$ ), 1.80 (ddt,  $^2J$  = 12.9 Hz,  $^3J$  = 8.9 Hz,  $^3J$  = 6.4 Hz, 1H,  $\text{C}^\alpha\text{CH}_2$ ), 1.77-1.68 (m, 1H,  $\text{C}^\alpha\text{CH}_2$ ), 1.64 (td,  $^2J$  = 9.2 Hz,  $^3J$  = 8.6 Hz,  $^3J$  = 4.1 Hz, 2H,  $\text{C}^\alpha\text{CH}_2\text{CH}_2$ ), 1.14 (s, 9H,  $\text{SC}(\text{CH}_3)_3$ ).  $^{13}\text{C}$  NMR (126 MHz, Chloroform-*d*)  $\delta$  = 83.6 ( $\text{C}^\alpha\text{C}\equiv\text{CH}$ ), 73.2 ( $\text{C}^\alpha\text{C}\equiv\text{CH}$ ), 61.6 ( $\text{CH}_2\text{OH}$ ), 56.3 ( $\text{C}(\text{CH}_3)_3$ ), 47.3 ( $\text{C}^\alpha$ ), 33.5 ( $\text{C}^\alpha\text{CH}_2$ ), 28.6 ( $\text{C}^\alpha\text{CH}_2\text{CH}_2$ ), 22.6 ( $\text{SC}(\text{CH}_3)_3$ ).  $\text{C}_{10}\text{H}_{19}\text{NO}_2\text{S}$  (217.33 g mol $^{-1}$ ). MS(ESI):  $m/z$  = 218.1213 (218.1209 [ $\text{M}+\text{H}$ ] $^+$ ). TLC:  $R_f$  (EtOAc) = 0.15.  $[\alpha]_{589}^{20}$  = 34.8 ( $c$  = 1.0;  $\text{CHCl}_3$ ). IR(ATR):  $\tilde{\nu}$  [cm $^{-1}$ ] = 3360 (OH), 3262 (NH), 3132 ( $\text{CH}_3$ ), 2948 ( $\text{CH}_2$ ), 2898 ( $\text{CH}_2$ ), 1027 (SO).

(*S*)-*N*-((*S*)-7-Azidohept-1-yn-3-yl)-*tert*-butylsulfonamide (**7vx**)

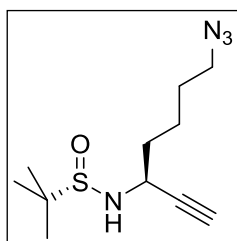

Synthesis: GP-5, starting material was the crude product of **6v**. Reaction scale: 1.16 mmol of imine **5v**. Purification by column chromatography (PE/EtOAc, 2:1). Compound **7vx** has been first described by Ye, He and Zhang [29].

Yellow oil, yield: 170 mg, 0.67 mmol, 58 % (over two steps, referred to imine **5v**). *dr* = 74:26.  $^1\text{H}$  NMR (500 MHz, Chloroform-*d*)  $\delta$  = 4.00 (m, 1H,  $\text{C}^\alpha\text{H}$ ), 3.42 (d,  $^3J$  = 6.7 Hz, 1H, NH), 3.26 (t,  $^3J$  = 6.6 Hz, 2H,  $\text{N}_3\text{CH}_2$ ), 2.41 (d,  $^4J$  = 2.4 Hz, 1H,  $\text{C}\equiv\text{CH}$ ), 1.72 (ddd,  $^2J$  = 15.0 Hz,  $^3J$  = 8.1 Hz,  $^3J$  = 6.2 Hz, 2H,  $\text{C}^\alpha\text{CH}_2$ ), 1.63-1.57 (m, 2H,  $\text{N}_3\text{CH}_2\text{CH}_2$ ), 1.56-1.48 (m, 2H,  $\text{C}^\alpha\text{CH}_2\text{CH}_2$ ), 1.19 (s, 9H,  $\text{C}(\text{CH}_3)_3$ ).  $^{13}\text{C}$  NMR (126 MHz, Chloroform-*d*)  $\delta$  = 83.4 ( $\text{C}^\alpha\text{C}\equiv\text{CH}$ ), 73.4 ( $\text{C}^\alpha\text{C}\equiv\text{CH}$ ), 56.7 ( $\text{C}(\text{CH}_3)_3$ ), 51.2 ( $\text{N}_3\text{CH}_2$ ), 47.3 ( $\text{C}^\alpha$ ), 36.2 ( $\text{C}^\alpha\text{CH}_2\text{CH}_2$ ), 28.4 ( $\text{C}^\alpha\text{CH}_2$ ), 22.7 ( $\text{N}_3\text{CH}_2\text{CH}_2$ ), 22.6 ( $\text{C}(\text{CH}_3)_3$ ).  $\text{C}_{11}\text{H}_{20}\text{N}_4\text{OS}$  (256.37 g mol $^{-1}$ ), MS(ESI):  $m/z$  = 279.15 (279.13 [ $\text{M}+\text{Na}$ ] $^+$ ). TLC:  $R_f$  (EtOAc/PE, 1:2) = 0.25.



(*S*)-*N*-((*S*)-7-Aminohept-1-yn-3-yl)-*tert*-butylsulfonamide (**7vy**)

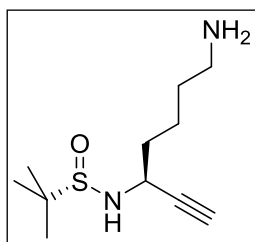

Synthesis: GP-4mod, (compare conversion of **5w** to **7wy**), starting material was the crude product of **6v**. Reaction scale: 5.24 mmol of imine **5v**.

Faintly yellow oil, yield: 0.82 g, 3.559 mmol, 68 %. *dr* = 91:9. <sup>1</sup>H NMR

(500 MHz, Chloroform-*d*)  $\delta$  = 3.98 (m, 1H, C <sup>$\alpha$</sup> H), 3.48 (d, <sup>3</sup>*J* = 6.7 Hz, 1H, NH), 2.67 (t, <sup>3</sup>*J* = 6.5 Hz, 2H, H<sub>2</sub>NCH<sub>2</sub>), 2.39 (d, <sup>4</sup>*J* = 2.3 Hz, 1H, C $\equiv$ CH), 1.94-1.87 (m, 2H, NH<sub>2</sub>), 1.77-1.64 (m, 2H, C <sup>$\alpha$</sup> CH<sub>2</sub>), 1.50-1.40 (m, 4H, C <sup>$\alpha$</sup> CH<sub>2</sub>CH<sub>2</sub>CH<sub>2</sub>), 1.18 (s, 9H, C(CH<sub>3</sub>)<sub>3</sub>). <sup>13</sup>C NMR (126 MHz, Chloroform-*d*)  $\delta$  = 83.8 (C <sup>$\alpha$</sup> C $\equiv$ CH), 73.1 (C <sup>$\alpha$</sup> C $\equiv$ CH), 56.2 (C(CH<sub>3</sub>)<sub>3</sub>), 47.5 (C <sup>$\alpha$</sup> ), 41.9 (H<sub>2</sub>NCH<sub>2</sub>), 36.6 (C <sup>$\alpha$</sup> CH<sub>2</sub>), 33.0 (C <sup>$\alpha$</sup> CH<sub>2</sub>CH<sub>2</sub>), 22.8 (H<sub>2</sub>NCH<sub>2</sub>CH<sub>2</sub>), 22.6 (C(CH<sub>3</sub>)<sub>3</sub>). C<sub>11</sub>H<sub>22</sub>N<sub>2</sub>OS (230.37 g mol<sup>-1</sup>). MS(ESI): *m/z* = 253.1352 (253.1345 [M+Na]<sup>+</sup>). [ $\alpha$ ]<sub>589</sub><sup>22</sup> = 9.3 (*c* = 2.5; CHCl<sub>3</sub>). TLC: *R*<sub>f</sub> (DCM/MeOH/NEt<sub>3</sub>, 88:10:2) = 0.18. IR(ATR):  $\tilde{\nu}$  [cm<sup>-1</sup>] = 3297 (NH), 2927 (NH<sub>2</sub>), 2863 (CH), 1695, 1521, 1458, 1366, 1253, 1169, 1052, 669.

*tert*-Butyl ((*S*)-5-(((*S*)-*tert*-Butylsulfinyl)amino)hept-6-yn-1-yl)carbamate (**7vz**)

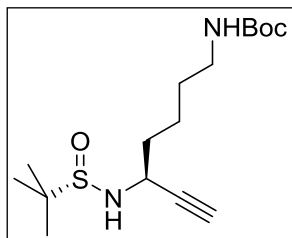

The Boc protection of propargylamine **7vy** was carried out as suggested by Basel and Hassner [52]: Propargylamine **7vy** (820 mg, 3.56 mmol, 1 equiv) was dissolved in a mixture of THF/H<sub>2</sub>O (1:1, 12 mL). Boc<sub>2</sub>O (1.55 g, 7.12 mmol, 2 equiv) and NaHCO<sub>3</sub> (900 mg, 10.7 mmol, 3 equiv) was added in one portion. The colourless

suspension was stirred at rt overnight. When all starting material was consumed (monitored by TLC), imidazole (730 mg, 10.7 mmol, 3 equiv) was added and the reaction mixture was stirred for another 4 h at rt. The solution was concentrated under vacuum and then diluted with EtOAc (35 mL). The phases were separated and the organic layer was washed with aqueous HCl (0.1 M, 3  $\times$  approximately 10 mL) until the aqueous layer was acidic. The organic layer was washed with brine (5 mL), dried over Na<sub>2</sub>SO<sub>4</sub> and the solvent was evaporated under reduced pressure. The crude product was purified by column chromatography (PE/EtOAc, 2:1). Compound **7vz** has been first described by Ye, He and Zhang [29].

Faintly yellow oil, yield: 531 mg, 1.607 mmol, 45 %. <sup>1</sup>H NMR (500 MHz, Chloroform-*d*)  $\delta$  = 4.56 (s, 1H, NHBoc), 4.02 (m, 1H, C <sup>$\alpha$</sup> H), 3.35 (d, <sup>3</sup>*J* = 6.6 Hz, 1H, NH), 3.12 (t, <sup>3</sup>*J* = 6.6 Hz, 2H, NHCH<sub>2</sub>), 2.41 (d, <sup>4</sup>*J* = 2.2 Hz, 1H, C <sup>$\alpha$</sup> C $\equiv$ CH), 1.80-1.67 (m, 2H, C <sup>$\alpha$</sup> CH<sub>2</sub>CH<sub>2</sub>), 1.66-1.59

(m, 2H, C<sup>α</sup>CH<sub>2</sub>CH<sub>2</sub>CH<sub>2</sub>), 1.53-1.47 (m, 2H, C<sup>α</sup>CH<sub>2</sub>), 1.44 (s, 9H, OC(CH<sub>3</sub>)<sub>3</sub>), 1.22 (s, 9H, SC(CH<sub>3</sub>)<sub>3</sub>). <sup>1</sup>H NMR (500 MHz, DMSO-*d*<sub>6</sub>) δ = 6.76 (t, <sup>3</sup>*J* = 5.8 Hz, 1H, NHBoc), 5.62 (d, <sup>3</sup>*J* = 7.9 Hz, 1H, C<sup>α</sup>NH), 3.82 (q, <sup>3</sup>*J* = 7.2 Hz, 1H, C<sup>α</sup>H), 3.26 (d, <sup>4</sup>*J* = 1.6 Hz, 1H, C<sup>α</sup>C≡CH), 2.89 (m, 2H, BocHNCH<sub>2</sub>), 1.63 (m, 2H, C<sup>α</sup>CH<sub>2</sub>), 1.37 (s, 9H, CO<sub>2</sub>C(CH<sub>3</sub>)<sub>3</sub>), 1.29-1.41 (m, 4H, C<sup>α</sup>CH<sub>2</sub>CH<sub>2</sub>CH<sub>2</sub>), 1.12 (s, 9H, SC(CH<sub>3</sub>)<sub>3</sub>). <sup>13</sup>C NMR (126 MHz, DMSO) δ = 155.5 (CO<sub>2</sub>), 85.2 (C≡CH), 77.3 (CO<sub>2</sub>C(CH<sub>3</sub>)<sub>3</sub>), 74.3 (C<sup>α</sup>C≡CH), 55.5 (SC(CH<sub>3</sub>)<sub>3</sub>), 46.7 (C<sup>α</sup>), 36.4 (BocHNCH<sub>2</sub>), 28.9 (C<sup>α</sup>CH<sub>2</sub>), 28.3 (SC(CH<sub>3</sub>)<sub>3</sub>), 22.7 (BocHNCH<sub>2</sub>CH<sub>2</sub>), 22.6 (CO<sub>2</sub>C(CH<sub>3</sub>)<sub>3</sub>), 22.5 (C<sup>α</sup>CH<sub>2</sub>CH<sub>2</sub>). C<sub>16</sub>H<sub>30</sub>N<sub>2</sub>O<sub>3</sub>S (330.49 g mol<sup>-1</sup>). MS(ESI): 331.2045 (331.20499 [M+H]<sup>+</sup>). [α]<sub>D</sub><sup>25</sup> = 25.0 (*c* = 0.19; CHCl<sub>3</sub>). TLC: R<sub>f</sub>(PE/EtOAc, 2:1) = 0.37.

(*S*)-*N*-((*S*)-6-Azidohex-1-yn-3-yl)-*tert*-butylsulfonamide **7wx**

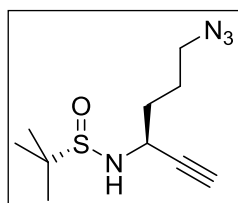

Synthesis: GP-6, starting material was the crude product of **6w**. Reaction scale: 11.53 mmol of imine **5w**. The crude product was separated by column chromatography (elution with EtOAc/PE, 1:1). The ratio of propargylamine **7wx** and triazole **13** was 1:4. Compound **7wx** was observed to be instable. A solution of **7wx** was investigated by <sup>1</sup>H NMR spectroscopy. After one week, 66 % of the alkyne had undergone an intramolecular Huisgen reaction and formed compound **14**.

Faintly yellow oil, yield: 0.531 g, 2.19 mmol, 19 % (isolated yield), *dr* = 96:4. <sup>1</sup>H NMR (500 MHz, Chloroform-*d*) δ = 4.09 (m, 1H, C<sup>α</sup>H), 3.58 (t, <sup>3</sup>*J* = 6.3 Hz, 2H, N<sub>3</sub>CH<sub>2</sub>), 3.35 (d, <sup>3</sup>*J* = 6.5 Hz, 1H, NH), 2.44 (d, <sup>4</sup>*J* = 2.3 Hz, 1H, C<sup>α</sup>C≡CH), 2.01-1.93 (m, 2H, C<sup>α</sup>CH<sub>2</sub>), 1.93-1.84 (m, 2H, C<sup>α</sup>CH<sub>2</sub>CH<sub>2</sub>), 1.23 (s, 9H, C(CH<sub>3</sub>)<sub>3</sub>). <sup>13</sup>C NMR (126 MHz, Chloroform-*d*) δ = 83.2 (C<sup>α</sup>C≡CH), 73.8 (C<sup>α</sup>C≡CH), 56.4 (C(CH<sub>3</sub>)<sub>3</sub>), 46.9 (C<sup>α</sup>), 44.5 (H<sub>2</sub>NCH<sub>2</sub>), 34.1 (C<sup>α</sup>HCH<sub>2</sub>), 28.6 (H<sub>2</sub>NCH<sub>2</sub>CH<sub>2</sub>), 22.7 (C(CH<sub>3</sub>)<sub>3</sub>). C<sub>10</sub>H<sub>18</sub>N<sub>4</sub>OS (242.34 g mol<sup>-1</sup>), MS(ESI): *m/z* = 265.1 (265.34 [M+Na]<sup>+</sup>). [α]<sub>D</sub><sup>21.2</sup> = 45.0 (*c* = 0.10; CHCl<sub>3</sub>). IR(ATR):  $\tilde{\nu}$  [cm<sup>-1</sup>] = 3287-3202 (NH), 2955 (CH<sub>2</sub>), 2369-2331 (N<sub>3</sub>), 1071 (SO).

(*S*)-*N*-((*S*)-6-Aminohex-1-yn-3-yl)-2-methylpropane-2-sulfonamide (**7wy**)

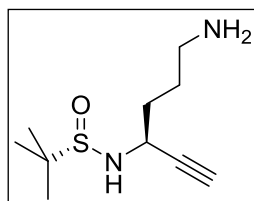

Synthesis: *n*-Butyllithium (1.6 M in *n*-hexane, 35.2 mL, 56.3 mmol, 1.2 equiv) was added dropwise to a solution of TMS-acetylene (7.9 mL,

56.3 mmol, 1.2 equiv) in toluene (90 mL) at  $-78\text{ }^{\circ}\text{C}$ . The clear solution was stirred for 2 h, before a solution of imine **5w** (10.14 g, 46.9 mmol, 1 equiv) in toluene (90 mL) was dropped very slowly into the mixture. After full conversion (3-4 h, monitored by analytical HPLC), a solution of  $\text{PPh}_3$  (49.2 g, 187 mmol, 4.0 equiv) in THF (150 mL) was added to the reaction mixture and the cooling bath was removed, so that the solution could warm up to rt. When no further evolution of gas could be observed (2 h later), water (150 mL) was added to the orange reaction mixture and stirring was continued vigorously for 10 h. Then, the phases were separated. The organic phase was washed with a solution of  $\text{NaHCO}_3$  (5 %, 50 mL). The combined aqueous layers were extracted with DCM ( $5 \times 40\text{ mL}$ ). The combined organic layers were dried over  $\text{Na}_2\text{SO}_4$  and the solvent was evaporated under reduced pressure. The crude product was purified by column chromatography (DCM/MeOH/ $\text{NEt}_3$ , 88:10:2) to yield compound **7wy** in pure form.

Yellow oil, yield: 7.330 g, 33.88 mmol, 86 %,  $dr = 80:20$ .  $^1\text{H}$  NMR (500 MHz, Chloroform- $d$ )  $\delta = 3.99$  (dd,  $^3J = 5.9\text{ Hz}$ ,  $^3J = 5.9\text{ Hz}$ , 1H,  $\text{C}^{\alpha}\text{H}$ ), 2.70 (t,  $^3J = 6.8\text{ Hz}$ , 2H,  $\text{H}_2\text{NCH}_2$ ), 2.57 (s, 2H,  $\text{NH}_2$ ), 2.40 (d,  $^4J = 2.0\text{ Hz}$ , 1H,  $\text{C}^{\alpha}\text{C}\equiv\text{CH}$ ), 1.77 (m, 1H,  $\text{C}^{\alpha}\text{CH}_2$ ), 1.69 (m, 1H,  $\text{C}^{\alpha}\text{CH}_2$ ), 1.60 (m, 2H,  $\text{C}^{\alpha}\text{CH}_2\text{CH}_2$ ), 1.16 (s, 9H,  $\text{SC}(\text{CH}_3)_3$ ).  $^{13}\text{C}$  NMR (126 MHz, Chloroform- $d$ )  $\delta = 83.7$  ( $\text{C}^{\alpha}\text{C}\equiv\text{CH}$ ), 73.2 ( $\text{C}^{\alpha}\text{C}\equiv\text{CH}$ ), 56.3 ( $\text{C}(\text{CH}_3)_3$ ), 47.3 ( $\text{C}^{\alpha}$ ), 41.3 ( $\text{NH}_2\text{CH}_2$ ), 34.3 ( $\text{C}^{\alpha}\text{CH}_2$ ), 28.8 ( $\text{C}^{\alpha}\text{CH}_2\text{CH}_2$ ), 22.6 ( $\text{C}(\text{CH}_3)_3$ ).  $\text{C}_{10}\text{H}_{20}\text{N}_2\text{OS}$  (216.34  $\text{g mol}^{-1}$ ). MS(ESI):  $m/z = 217.1357$  (217.1369  $[\text{M}+\text{H}]^+$ ).  $[\alpha]_{589}^{22} = 26.2$  ( $c = 0.51$ ;  $\text{CHCl}_3$ ). TLC:  $R_f$  (DCM/MeOH/ $\text{NEt}_3$ , 88:10:2) = 0.25.

*tert*-Butyl ((*S*)-4-(((*S*)-*tert*-butylsulfinyl)amino)hex-5-yn-1-yl)carbamate **7wz**

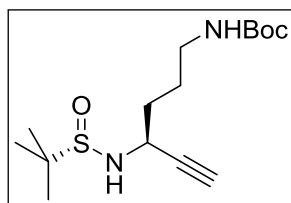

Synthesis: See preparation of **7vz**, starting material was the crude product of **7wy**. Reaction scale: 19.83 mmol of imine **5w**. Purification by column chromatography (PE/EtOAc, 2:1).

Colourless highly viscous oil, yield: 3.9515 g, 12.487 mmol, 63 %,  $dr = 90:10$ .  $^1\text{H}$  NMR (500 MHz, Chloroform- $d$ )  $\delta = 4.57$  (s, 1H,  $\text{NH-Boc}$ ), 4.06 (qd,  $^3J = 6.5\text{ Hz}$ ,  $^4J = 2.3\text{ Hz}$ , 1H,  $\text{C}^{\alpha}\text{H}$ ), 3.37 (d,  $^3J = 6.6\text{ Hz}$ , 1H,  $\text{NH}$ ), 3.16 (q,  $^3J = 6.8\text{ Hz}$ , 2H,  $\text{BocHNCH}_2$ ), 2.42 (d,  $^4J = 2.3\text{ Hz}$ , 1H,  $\text{C}^{\alpha}\text{C}\equiv\text{CH}$ ), 1.82- 1.70 (m, 2H,  $\text{C}^{\alpha}\text{CH}_2$ ), 1.69- 1.62 (m, 2H,  $\text{C}^{\alpha}\text{CH}_2\text{CH}_2$ ), 1.44 (s, 9H,  $\text{CO}_2\text{C}(\text{CH}_3)_3$ ), 1.22 (s, 9H,  $\text{SC}(\text{CH}_3)_3$ ).  $^{13}\text{C}$  NMR (126 MHz, Chloroform- $d$ )  $\delta = 156.1$  ( $\text{CO}_2$ ), 83.5 ( $\text{C}^{\alpha}\text{C}\equiv\text{CH}$ ), 79.4 ( $\text{CO}_2\text{C}(\text{CH}_3)_3$ ), 73.5 ( $\text{C}^{\alpha}\text{C}\equiv\text{CH}$ ), 56.4 ( $\text{SC}(\text{CH}_3)_3$ ), 47.3 ( $\text{C}^{\alpha}$ ), 34.1 ( $\text{BocHNCH}_2$ ), 28.6 ( $\text{CO}_2\text{C}(\text{CH}_3)_3$ ), 26.3 ( $\text{C}^{\alpha}\text{CH}_2$ ), 22.7

(SC(CH<sub>3</sub>)<sub>3</sub>), 22.6 (C<sup>α</sup>CH<sub>2</sub>CH<sub>2</sub>). C<sub>15</sub>H<sub>28</sub>N<sub>2</sub>O<sub>3</sub>S (316.46 g mol<sup>-1</sup>), MS(ESI): *m/z* = 339.1709 (339.1713 [M+Na]<sup>+</sup>), [α]<sub>D</sub><sup>25</sup> = 42.3 (*c* = 0.24; CHCl<sub>3</sub>). TLC: *R<sub>f</sub>* (EtOAc) = 0.56. IR(ATR):  $\tilde{\nu}$  [cm<sup>-1</sup>] = 3297 (NH), 2971 (CH), 2924 (CH), 2867 (CH), 1689 (CO), 1524 (SO), 1363, 1252, 1169, 1055.

#### DiBoc protected arginine analogue Propargylamine **7x**

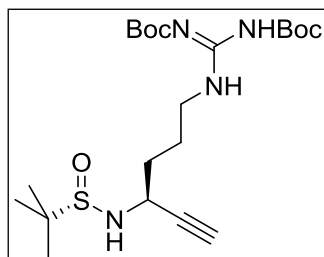

Propargylamine **7wy** (3.378 g, 15.61 mmol, 1 equiv) and DiBocisothiurea (4.5 g, 15.5 mmol, 1.0 equiv) were dissolved under argon atmosphere in dry DCM (20 mL). The reaction mixture was stirred for 3 d at rt. Then the solvent was evaporated under reduced pressure. The residue was diluted with water (30 mL) and the solution was extracted with DCM (5 × 30 mL). The combined organic layers were washed with brine (15 mL) and dried over Na<sub>2</sub>SO<sub>4</sub> before the solvent was evaporated in vacuum. The crude product was purified by column chromatography (DCM/MeOH, 10:1).

Faintly yellow, highly viscous oil, yield: 5.625 g, 12.27 mmol, 79 %, dr = 93:7, <sup>1</sup>H NMR (500 MHz, Chloroform-*d*) δ = 11.48 (s, 1H, NHBoc), 8.37 (s, 1H, NHCN<sub>2</sub>), 4.11-4.04 (m, 1H, C<sup>α</sup>H), 3.47 (t, <sup>3</sup>*J* = 6.2 Hz, 2H, N<sub>2</sub>CNCH<sub>2</sub>), 3.40 (d, <sup>3</sup>*J* = 6.5 Hz, 1H, C<sup>α</sup>NH), 2.42 (d, <sup>4</sup>*J* = 2.3 Hz, 1H, C≡CH), 1.81-1.72 (m, 4H, C<sup>α</sup>CH<sub>2</sub>CH<sub>2</sub>), 1.49 (s, 9H, C=NCO<sub>2</sub>C(CH<sub>3</sub>)<sub>3</sub>), 1.49 (s, 9H, CHNCO<sub>2</sub>C(CH<sub>3</sub>)<sub>3</sub>), 1.21 (s, 9H, SC(CH<sub>3</sub>)<sub>3</sub>). <sup>13</sup>C NMR (126 MHz, Chloroform-*d*) δ = 163.7 (NCN<sub>2</sub>), 156.3 (C=NCO<sub>2</sub><sup>t</sup>Bu), 153.4 (CHNCO<sub>2</sub><sup>t</sup>Bu), 83.4 (C<sup>α</sup>C≡CH), 83.3 (C=NCO<sub>2</sub>C(CH<sub>3</sub>)<sub>3</sub>), 79.5 (CHNCO<sub>2</sub>C(CH<sub>3</sub>)<sub>3</sub>), 73.6 (C<sup>α</sup>C≡CH), 56.4 (SC(CH<sub>3</sub>)<sub>3</sub>), 47.2 (C<sup>α</sup>C≡CH), 40.4 (CH<sub>2</sub>NHCN<sub>2</sub>), 34.0 (C<sup>α</sup>CH<sub>2</sub>), 28.4 (C=NCO<sub>2</sub>C(CH<sub>3</sub>)<sub>3</sub>), 28.2 (CHNCO<sub>2</sub>C(CH<sub>3</sub>)<sub>3</sub>), 25.2 (C<sup>α</sup>CH<sub>2</sub>CH<sub>2</sub>), 22.7 (SC(CH<sub>3</sub>)<sub>3</sub>). C<sub>21</sub>H<sub>38</sub>N<sub>4</sub>O<sub>5</sub>S (458.62 g mol<sup>-1</sup>), MS(ESI): *m/z* = 459.2719 (459.2636 [M+H]<sup>+</sup>), 481.2453 (481.2455 [M+Na]<sup>+</sup>).

#### Hydrolysis of imine **5** forms hemiaminal **8**

(*S*)-*N*-(2,2,2-Trifluoro-1-hydroxyethyl)-*tert*-butylsulfinamide (**8k**)

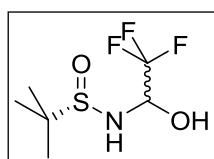

A solution of crude imine **5k** in DCM was diluted with water. The organic layer was evaporated under reduced pressure. Then, the aqueous layer was extracted with DCM (3 × 30 mL). The combined organic layers were dried

over Na<sub>2</sub>SO<sub>4</sub> and the solvent was evaporated under vacuum to yield a colourless solid. Recrystallization from EtOAc yielded hemiaminal **8k** in high purity.

Colourless crystals, yield: 1.773 g, 8.810 mmol, 34 % (referred to Ellman's sulfinamide (**S**)-**1**). <sup>1</sup>H NMR (300 MHz, DMSO-*d*<sub>6</sub>) δ = 7.41 (d, <sup>3</sup>*J*<sub>HH</sub> = 5.2 Hz, 1H, OH), 6.59 (d, <sup>3</sup>*J*<sub>HH</sub> = 8.2 Hz, 1H, NH), 4.98 (m, 1H, C<sup>α</sup>H), 1.10 (s, 9H, C(CH<sub>3</sub>)<sub>3</sub>). <sup>19</sup>F NMR (282 MHz, DMSO-*d*<sub>6</sub>) δ = -80.0 (d, <sup>3</sup>*J*<sub>FH</sub> = 5.6 Hz, CF<sub>3</sub>). <sup>13</sup>C NMR (126 MHz, Chloroform-*d*) δ = 122.5 (q, <sup>1</sup>*J*<sub>CF</sub> = 281.8 Hz, CF<sub>3</sub>), 80.3 (q, <sup>2</sup>*J*<sub>CF</sub> = 34.9 Hz, C<sup>α</sup>H), 57.3 (C(CH<sub>3</sub>)<sub>3</sub>), 22.5 (CH<sub>3</sub>). C<sub>6</sub>H<sub>12</sub>F<sub>3</sub>NO<sub>2</sub>S (219.22 g mol<sup>-1</sup>).

#### (*S*)-*N*-(2,2,2-Trichloro-1-hydroxyethyl)-*tert*-butylsulfinamide (**8l**)

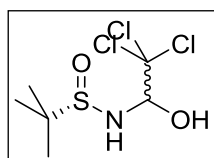

Ellman's chiral sulfinamide (**S**)-**1** (1.00 g, 8.25 mmol, 1 equiv) was added in one portion to freshly dried and distilled chloral (1.21 g, 9.38 mmol, 1 equiv) and the mixture was dissolved in DCM (20 mL). After stirring of the solution for 3 d, conversion of the starting material was complete (monitored by TLC). Water (20 mL) was added and the emulsion was concentrated up under reduced pressure. The residue was stirred for 1.5 h at rt, before it was extracted with DCM (3 × 30 mL). TLC showed complete consumption of the formed intermediate. The combined organic layers were washed with brine (10 mL), dried over MgSO<sub>4</sub> and the solvent was evaporated under vacuum. The crude product was obtained in form of a colourless, crystalline solid. Hemiaminal **8l** was isolated by column chromatography.

Colourless crystals, yield: 1.0847 g, 4.0386 mmol, 49 % (referred to Ellman's sulfinamide (**S**)-**1**). <sup>1</sup>H NMR (500 MHz, DMSO-*d*<sub>6</sub>) δ = 7.82 (d, <sup>3</sup>*J* = 6.7 Hz, 1H, OH), 5.83 (d, <sup>3</sup>*J* = 8.7 Hz, 1H, NH), 5.05 (dd, <sup>3</sup>*J* = 8.7 Hz, <sup>3</sup>*J* = 6.6 Hz, 1H, C<sup>α</sup>H), 1.17 (s, 9H, SC(CH<sub>3</sub>)<sub>3</sub>). <sup>13</sup>C NMR (126 MHz, DMSO) δ = 103.6 (Cl<sub>3</sub>C), 89.4 (C<sup>α</sup>), 56.6 (C(CH<sub>3</sub>)<sub>3</sub>), 22.8 (C(CH<sub>3</sub>)<sub>3</sub>). C<sub>6</sub>H<sub>12</sub>Cl<sub>3</sub>NO<sub>2</sub>S (268.58 g mol<sup>-1</sup>). TLC: R<sub>f</sub>(EtOAc/PE, 1:4) = 0.14.

#### Side-product **9k** of the conversion of **5k** with GP-3

##### (*S*)-*N*-((*R*)-2,2,2-trifluoro-1-isopropoxyethyl)-*tert*-butylsulfinamide (**9k**)

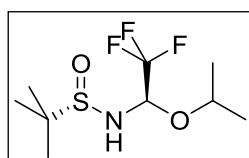

Synthesis: GP-3: Ti(OiPr)<sub>4</sub> (2.61 mL, 8.816 mmol, 1 equiv) was added to a solution of crude **5k** (8.816 mmol) and the mixture was dropped

directly into a solution of trimethylsilylethynyl lithium (14.1 mmol, 1.6 equiv) in THF (50 mL) at  $-78\text{ }^{\circ}\text{C}$ . The reaction mixture was stirred at  $-78\text{ }^{\circ}\text{C}$  for 2 h, and then warmed up to rt. The solution was diluted with a saturated aqueous solution of  $\text{NH}_4\text{Cl}$  (40 mL) and the colourless precipitate was filtered through a pad of celite. The phases were separated and the aqueous layer was extracted with DCM ( $2 \times 30\text{ mL}$ ). The combined organic layers were washed with brine (10 mL) and dried over  $\text{Na}_2\text{SO}_4$  before the solvent was evaporated under reduced pressure. The crude product was recrystallized from EtOAc/Et<sub>2</sub>O, 1:2 to yield aminoral **9k** in pure form.

Colourless crystals, yield: 727.9 mg, 2.786 mmol, 32 % (referred to Ellman's sulfinamide (*S*)-**1**). <sup>1</sup>H NMR (300 MHz, Chloroform-*d*)  $\delta$  = 4.72 (dq,  $^3J_{\text{HH}} = 9.6\text{ Hz}$ ,  $^3J_{\text{HF}} = 4.7\text{ Hz}$ , 1H, C<sup>*α*</sup>H), 4.10 (septett,  $^3J_{\text{HH}} = 6.1\text{ Hz}$ , 1H, (CH<sub>3</sub>)<sub>2</sub>CH), 3.90 (d,  $^3J_{\text{HH}} = 9.9\text{ Hz}$ , 1H, NH), 1.19 (d,  $^3J_{\text{HH}} = 6.3\text{ Hz}$ , 3H, (CH<sub>3</sub>)CHCH<sub>3</sub>), 1.17 (s, 9H, C(CH<sub>3</sub>)<sub>3</sub>), 1.14 (d,  $^3J_{\text{HH}} = 6.1\text{ Hz}$ , 3H, (CH<sub>3</sub>)CHCH<sub>3</sub>). <sup>13</sup>C NMR (126 MHz, Chloroform-*d*)  $\delta$  = 122.3 (q,  $^1J_{\text{CF}} = 282.4\text{ Hz}$ , CF<sub>3</sub>), 83.5 (q,  $^2J_{\text{CF}} = 33.7\text{ Hz}$ ), 70.7 (OCH(CH<sub>3</sub>)<sub>2</sub>), 56.9 (C(CH<sub>3</sub>)<sub>3</sub>), 22.8 (C(CH<sub>3</sub>)<sub>3</sub>), 22.3 ((CH<sub>3</sub>)CHCH<sub>3</sub>), 20.5 ((CH<sub>3</sub>)CHCH<sub>3</sub>). <sup>19</sup>F NMR (282 MHz, Chloroform-*d*)  $\delta$  = -80.8 (d,  $^3J_{\text{FH}} = 5.0\text{ Hz}$ , CF<sub>3</sub>). C<sub>9</sub>H<sub>18</sub>F<sub>3</sub>NO<sub>2</sub>S (261.30 g mol<sup>-1</sup>). MS(ESI):  $m/z$  = 262.1080 (262.10831 [M+H]<sup>+</sup>). TLC: R<sub>f</sub> (PE/EtOAc, 2:1) = 0.42.

### Side-product 10k of the conversion of 5k with GP-4

(*S*)-*N*-((*R*)-1,1,1-Trifluoropropane-2-yl)-*tert*-butylsulfinamide (**10k**)

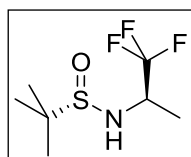

Synthesis: GP-4. A solution of  $\text{AlMe}_3$  (2.0 M in *n*-hexane, 9.8 mL, 19.6 mmol, 1 equiv) was added to a solution of crude **5k** (19.68 mmol) and the mixture was dropped directly into a solution of trimethylsilylethynyl lithium (31.5 mmol, 1.6 equiv) in toluene (70 mL) at  $-78\text{ }^{\circ}\text{C}$ . The reaction mixture was stirred at  $-78\text{ }^{\circ}\text{C}$  for 2 h, and then warmed up to rt. The solution was diluted with a saturated aqueous solution of  $\text{NH}_4\text{Cl}$  (40 mL) and the colourless slurry was filtered through a pad of celite. The phases were separated and the aqueous layer was extracted with DCM ( $2 \times 30\text{ mL}$ ). The combined organic layers were washed with brine (10 mL) and dried over  $\text{Na}_2\text{SO}_4$  before the solvent was evaporated under reduced pressure. The crude product was recrystallised from EtOAc/*n*-hexane, 1:5 to yield aminoral **10k** in pure form. Racemic compound **10k** has been first prepared by Packer, Melassis, Wells, Light and Linclau, by adding Ellman's sulfinamide (*R*)-**1** to 1,1,1-trifluoropropan-2-one [53].

Colourless crystals, yield: 2.262 g, 10.41 mmol, 53 % (referred to Ellman's sulfinamide (**S**)-**1**).  $^1\text{H}$  NMR (300 MHz, Chloroform-*d*)  $\delta$  = 3.84 (m, 1H,  $\text{C}^\alpha\text{H}$ ), 3.13 (d,  $^3J_{\text{HH}}$  = 7.4 Hz, 1H,  $\text{NH}$ ), 1.46 (d,  $^3J_{\text{HH}}$  = 6.9 Hz, 3H,  $\text{C}^\alpha\text{CH}_3$ ), 1.22 (s, 9H,  $\text{C}(\text{CH}_3)_3$ ).  $^{13}\text{C}$  NMR (75 MHz, Chloroform-*d*)  $\delta$  = 125.4 (q,  $^1J_{\text{CF}}$  = 280.1 Hz,  $\text{CF}_3$ ), 56.8 ( $\text{C}(\text{CH}_3)_3$ ), 54.6 (q,  $^2J_{\text{CF}}$  = 31.8 Hz,  $\text{C}^\alpha\text{H}$ ), 22.5 ( $\text{C}(\text{CH}_3)_3$ ), 16.7 (q,  $^4J_{\text{CF}}$  = 1.9 Hz,  $\text{C}^\alpha\text{CH}_3$ ).  $^{19}\text{F}$  NMR (282 MHz, Chloroform-*d*)  $\delta$  = -78.3 (d,  $^3J_{\text{FH}}$  = 7.0 Hz,  $\text{CF}_3$ ).  $\text{C}_7\text{H}_{14}\text{F}_3\text{NOS}$  (217.25 g mol $^{-1}$ ). MS(ESI):  $m/z$  = 218.0813 (218.0821  $[\text{M}+\text{H}]^+$ ).  $[\alpha]_{589}^{22} = -17.2$  ( $c$  = 0.33; MeOH).

Furthermore, TMS-protected alkyne **6k** could be isolated in a low amount of 1.384 g, 0.414 mmol, 22 %.

### Sonogashira cross-coupling products as peptidomimetics 11

Methyl 4-(((*S*)-3-(((*S*)-*tert*-butylsulfinylamido)-3-phenylprop-1-yn-1-yl)benzoate (**11i**)

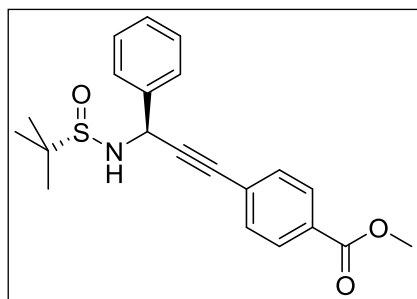

Synthesis: GP-9, reaction scale was 407  $\mu\text{mol}$  of propargylamine **7i**. The crude product was purified by column chromatography (PE/EtOAc, 1:1) and then recrystallized from Et<sub>2</sub>O.

Colourless crystalline solid, yield: 83 mg, 225  $\mu\text{mol}$ , 54 %.

$^1\text{H}$  NMR (500 MHz, Chloroform-*d*)  $\delta$  = 7.98 (d,  $^3J$  = 8.4 Hz, 2H, ar-2-**H**, ar-6-**H**), 7.56 (d,  $^3J$  = 6.9 Hz, 1H, Ph-2-**H**, Ph-6-**H**), 7.53 (d,  $^3J$  = 8.4 Hz, 2H, ar-3-**H**, ar-5-**H**), 7.41 (t,  $^3J$  = 7.3 Hz, 2H, Ph-3-**H**, Ph-5-**H**), 7.37 (m, 1H, Ph-4-**H**), 5.47 (m, 1H,  $\text{C}^\alpha\text{H}$ ), 3.92 (s, 3H,  $\text{CO}_2\text{CH}_3$ ), 1.27 (s, 9H,  $\text{SC}(\text{CH}_3)_3$ ).  $^{13}\text{C}$  NMR (126 MHz, Chloroform-*d*)  $\delta$  = 166.6 ( $\text{CO}_2\text{CH}_3$ ), 138.3 (Ph-**C**-1), 131.9 (ar-**C**-3, ar-**C**-5), 130.1 (ar-**C**-1), 129.6 (ar-**C**-2, ar-**C**-6), 129.0 (Ph-**C**-3, Ph-**C**-5), 128.8 (Ph-**C**-1), 127.8 (Ph-**C**-2, Ph-**C**-6), 127.0 (Ph-**C**-4), 90.2 ( $\text{C}^\alpha\text{C}\equiv\text{Car}$ ), 86.3 ( $\text{C}^\alpha\text{C}\equiv\text{Car}$ ), 57.3 ( $\text{SC}(\text{CH}_3)_3$ ), 52.4 ( $\text{CO}_2\text{CH}_3$ ), 52.3 ( $\text{C}^\alpha$ ), 22.7 ( $\text{SC}(\text{CH}_3)_3$ ).  $\text{C}_{21}\text{H}_{23}\text{NO}_3\text{S}$  (369.48 g mol $^{-1}$ ), MS(ESI):  $m/z$  = 392.975 (392.129  $[\text{M}+\text{Na}]^+$ ). IR(ATR):  $\tilde{\nu}$  [ $\text{cm}^{-1}$ ] = 2977 (CH), 2948 (CH), 2920 (CH), 2328 ( $\text{C}\equiv\text{C}$ ), 2353 (C-C), 1720 (C=O), 1543 (ar, C=C), 1280 (C-N). TLC:  $R_f$  (EtOAc/PE, 1:2) = 0.44.  $[\alpha]_{589}^{19} = 10.4$  ( $c$  = 0.72;  $\text{CHCl}_3$ ).

Methyl 3-((*R*)-3-(((*S*)-*tert*-butylsulfinyl)amido)-4,4,4-trifluorobut-1-yn-1-yl)benzoate (**11k**)

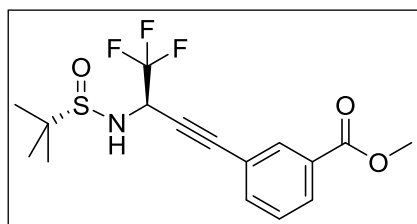

Synthesis: GP-9, reaction scale: 582  $\mu\text{mol}$  of propargylamine **7k**. The crude product was purified by column chromatography (PE/EtOAc, 1:1).

Faintly yellow oil, yield: 94.7 mg, 262  $\mu\text{mol}$ , 45 %.

$^1\text{H}$  NMR (300 MHz, Chloroform-*d*)  $\delta$  = 8.10 (t,  $^4J$  = 1.7 Hz, 1H, ar-2-**H**), 8.01 (dt,  $^3J$  = 7.9 Hz,  $^4J$  = 1.5 Hz, 1H, ar-6-**H**), 7.62 (dt,  $^3J$  = 7.7 Hz,  $^4J$  = 1.5 Hz, 1H, ar-4-**H**), 7.39 (t,  $^3J$  = 7.8 Hz, 1H, ar-5-**H**), 4.77 (dq,  $^3J$  = 7.6 Hz,  $^3J$  = 6.3 Hz, 1H, C <sup>$\alpha$</sup> -**H**), 4.04 (d,  $^3J$  = 7.6 Hz, 1H, NH), 3.90 (s, 3H, CO<sub>2</sub>CH<sub>3</sub>), 1.25 (s, 9H, SC(CH<sub>3</sub>)<sub>3</sub>).  $^{19}\text{F}$  NMR (282 MHz, Chloroform-*d*)  $\delta$  = -76.3 (d,  $^3J_{\text{FH}}$  = 6.3 Hz, CF<sub>3</sub>).  $^{13}\text{C}$  NMR (75 MHz, Chloroform-*d*)  $\delta$  = 166.2 (CO<sub>2</sub>(CH<sub>3</sub>)), 136.2 (ar-C-4), 133.2 (ar-C-2), 130.6 (ar-C-1), 130.5 (ar-C-6), 128.7 (ar-C-5), 121.5 (ar-C-3), 121.3 (q,  $^1J_{\text{CF}}$  = 280.7 Hz, CF<sub>3</sub>), 86.7 (C <sup>$\alpha$</sup> C $\equiv$ Car), 80.6 (q,  $^3J_{\text{CF}}$  = 2.2 Hz, C <sup>$\alpha$</sup> C $\equiv$ Car), 57.6 (SC(CH<sub>3</sub>)<sub>3</sub>), 52.4 (CO<sub>2</sub>CH<sub>3</sub>), 51.5 (q,  $^2J_{\text{CF}}$  = 35.1 Hz, C <sup>$\alpha$</sup> H), 22.5 (SC(CH<sub>3</sub>)<sub>3</sub>). C<sub>16</sub>H<sub>18</sub>F<sub>3</sub>NO<sub>3</sub>S (361.38 g mol<sup>-1</sup>). MS(ESI):  $m/z$  = 362.1022 (362.1032 [M+H]<sup>+</sup>). TLC: R<sub>f</sub>(EtOAc/PE, 1:1) = 0.63.

**Rearrangement products:  $\alpha,\beta$ -unsaturated imines 12**

Methyl 4-((1*E*,3*Z*)-3-(((*S*)-*tert*-butylsulfinyl)imido)-3-phenylprop-1-en-1-yl)benzoate (**12i**)

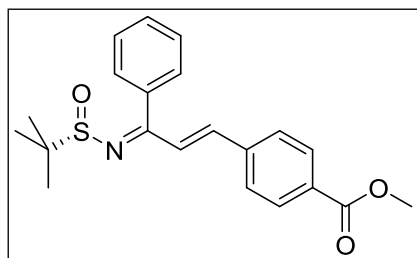

Piperidine (1 mL) was added to a solution of **11i** (151.5 mg, 409  $\mu\text{mol}$ ) in THF (3 mL) at 0 °C. The reaction mixture instantly turned brightly yellow. After 30 min, Et<sub>2</sub>O (20 mL) was added and the solution was washed with a KHSO<sub>4</sub> solution (5 %, 2  $\times$  approximately 20 mL) and brine

(5 mL). The organic layer was dried over Na<sub>2</sub>SO<sub>4</sub> and the solvent was evaporated under reduced pressure. The crude product was purified by column chromatography (PE/EtOAc, 10:1) and recrystallization from Et<sub>2</sub>O.

Brightly yellow crystalline solid, yield: 81.8 mg, 221  $\mu\text{mol}$ , 98 % (isolated yield).  $^1\text{H}$  NMR (600 MHz, Chloroform-*d*)  $\delta$  = 8.19 (d,  $^3J$  = 16.3 Hz, 1H, C <sup>$\alpha$</sup> HC=CHar), 8.01 (d,  $^3J$  = 8.3 Hz, 2H, ar-2-**H**, ar-6-**H**), 7.64 (d,  $^3J$  = 8.2 Hz, 2H, Ph-2-**H**, Ph-6-**H**), 7.56 (d,  $^3J$  = 7.9 Hz, 2H, ar-3-**H**, ar-5-**H**), 7.51 (t,  $^3J$  = 7.4 Hz, 1H, Ph-4-**H**), 7.45 (t,  $^3J$  = 7.5 Hz, 2H, Ph-3-**H**, Ph-5-**H**), 6.90 (d,  $^3J$  = 16.3 Hz, 1H, C <sup>$\alpha$</sup> HC=CHar), 3.91 (s, 3H, CO<sub>2</sub>CH<sub>3</sub>), 1.35 (s, 9H, SC(CH<sub>3</sub>)<sub>3</sub>).



$^{13}\text{C}$  NMR (151 MHz, Chloroform-*d*)  $\delta$  = 174.6 (PhC $^{\alpha}$ =N), 166.6 (CO $_2$ (CH $_3$ )), 142.2 (C $^{\alpha}$ HC=CHar), 139.6 (ar-C-1), 138.6 (Ph-C-1), 131.1 (ar-C-4), 131.0 (Ph-C-4), 130.2 (ar-C-2, ar-C-6), 129.3 (Ph-C-2, Ph-C-6), 128.5 (Ph-C-3, Ph-C-5), 128.0 (ar-C-3, ar-C-5), 124.7 (C $^{\alpha}$ HC=CHar), 58.8 (C(CH $_3$ ) $_3$ ), 52.4 (CO $_2$ CH $_3$ ), 23.0 (SC(CH $_3$ ) $_3$ ). C $_{21}$ H $_{23}$ NO $_3$ S (369.48 g mol $^{-1}$ ). MS(EI):  $m/z$  = 370.1 (370.15 [M+H] $^+$ ), 392.1 (392.13 [M+Na] $^+$ ). TLC: R $_f$  (EtOAc/PE, 1:1) = 0.6.  $[\alpha]_{589}^{20}$  = 246.8 ( $c$  = 1.46; CHCl $_3$ ). IR(ATR):  $\tilde{\nu}$  [cm $^{-1}$ ] = 2977 (CH), 2948 (CH), 2920 (CH), 2328 (C=C), 2353 (C-C), 1720 (CO), 1543 (ar, C=C), 1280 (C-N).

#### Methyl (*E*)-3-(4,4,4-trifluoro-3-iminobut-1-en-1-yl)benzoate (**12k**)

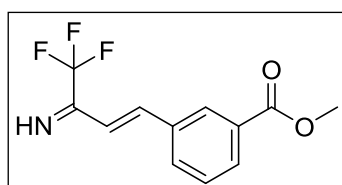

Propargylamine **11k** was dissolved in MeOH and an aqueous solution of LiOH (3 equiv, 1 M) was added dropwise at 0 °C. After 5 min, the solution turned brightly yellow, while the reaction progress was monitored by TLC. After complete conversion, the reaction mixture was acidified with HCl and extracted with Et $_2$ O (3  $\times$  30 mL). The combined organic layers were dried over NaSO $_4$ , the solvent was evaporated and the crude product directly investigated by NMR spectroscopy.

Crude product, brightly yellow oil, yield: 16.8 mg, 65.4  $\mu$ mol, 84 %.  $^1\text{H}$  NMR (500 MHz, Chloroform-*d*)  $\delta$  = 8.32 (t,  $^4J$  = 1.8 Hz, 1H, ar-2-**H**), 8.16 (dt,  $^3J$  = 7.8 Hz,  $^4J$  = 1.4 Hz, 1H, ar-6-**H**), 7.99 (d,  $^3J$  = 16.0 Hz, 1H, C $^{\alpha}$ C=CHar), 7.81 (dt,  $^3J$  = 7.7 Hz,  $^4J$  = 1.5 Hz, 1H, ar-4-**H**), 7.55 (t,  $^3J$  = 7.8 Hz, 1H, ar-5-**H**), 7.09 (dd,  $^3J$  = 16.0 Hz,  $^4J$  = 0.9 Hz, 1H, C $^{\alpha}$ CH=Car), 3.97 (s, 3H, CO $_2$ CH $_3$ ).  $^{19}\text{F}$  NMR (470 MHz, Chloroform-*d*)  $\delta$  = -77.7 (s, CF $_3$ ).  $^{13}\text{C}$  NMR (126 MHz, Chloroform-*d*)  $\delta$  = 180.0 (q,  $^2J_{CF}$  = 35.7 Hz, C=N), 162.1 (CO $_2$ (CH $_3$ )), 148.6 (C $^{\alpha}$ C=Car), 134.2 (ar-C-4), 134.0 (ar-C-1), 133.6 (ar-C-6), 131.2 (ar-C-3), 130.7 (ar-C-2), 129.8 (ar-C-5), 118.2 (C $^{\alpha}$ C=Car), 117.7 (q,  $^1J_{CF}$  = 290.8 Hz, CF $_3$ ). C $_{12}$ H $_{10}$ F $_3$ NO $_2$  (257.21 g mol $^{-1}$ ). MS(ESI):  $m/z$  = 362.1022 (362.1032 [M+H] $^+$ ). TLC: R $_f$  (EtOAc/PE, 1:2) = 0.74. UV/vis:  $\epsilon$  = 12.60 L mol $^{-1}$ cm $^{-1}$  (304 nm).

#### Intramolecular Huisgen reaction of **6w** gives triazole **13w**

(*S*)-*N*-((*S*)-3-(Trimethylsilyl)-4,5,6,7-tetrahydro-[1,2,3]triazolo[1,5-*a*]pyridine-4-yl)-*tert*-butylsulfonamide (**13w**)

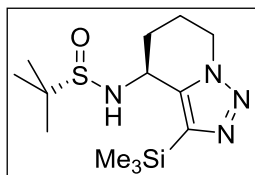

Synthesis: GP-4, reaction scale was 8.96 mmol of imine **5w**. The crude product was separated by column chromatography (elution with EtOAc). The ratio of propargylamine **6w** and triazole **13w** was 1:4. Triazole **13w** was recrystallized from toluene.

Colourless crystals, yield: 1.578 g, 5.017 mmol, 56 %, dr = 100:0.  $^1\text{H}$  NMR (500 MHz, Chloroform-*d*)  $\delta$  = 4.88 (m, 1H,  $\text{C}^{\alpha}\text{H}$ ), 4.66 (dd,  $^2J$  = 13.3 Hz,  $^3J$  = 5.4 Hz, 1H,  $\text{N}_3\text{CH}_2$ ), 4.13 (dt,  $^2J$  = 13.5 Hz,  $^3J$  = 5.2 Hz, 1H,  $\text{N}_3\text{CH}_2$ ), 3.07 (s, 1H,  $\text{NH}$ ), 2.38-2.23 (m, 2H,  $\text{C}^{\alpha}\text{CH}_2\text{CH}_2$ ), 1.99 (m, 1H,  $\text{C}^{\alpha}\text{CH}_2$ ), 1.82 (m, 1H,  $\text{C}^{\alpha}\text{CH}_2\text{CH}_2$ ), 1.19 (s, 9H,  $\text{SC}(\text{CH}_3)_3$ ), 0.39 (s, 9H,  $\text{Si}(\text{CH}_3)_3$ ).  $^{13}\text{C}$  NMR (126 MHz, Chloroform-*d*)  $\delta$  = 143.5 (TMSC=C), 139.3 (TMSC=C), 55.7 ( $\text{SC}(\text{CH}_3)_3$ ), 46.3 ( $\text{C}^{\alpha}$ ), 43.6 ( $\text{CH}_2\text{N}_3$ ), 26.1 ( $\text{C}^{\alpha}\text{CH}_2$ ), 22.5 ( $\text{SC}(\text{CH}_3)_3$ ), 16.8 ( $\text{C}^{\alpha}\text{CH}_2\text{CH}_2$ ), -0.8 ( $\text{Si}(\text{CH}_3)_3$ ).  $\text{C}_{13}\text{H}_{26}\text{N}_4\text{OSSi}$  (314.52 g mol $^{-1}$ ). MS(ESI):  $m/z$  = 315.1668 (315.16693  $[\text{M}+\text{H}]^+$ ). Smp.: 167 °C. IR(ATR):  $\tilde{\nu}$  [ $\text{cm}^{-1}$ ] = 3307 (NH), 3234 (CH), 2952 (CH), 2898 (CH), 2860 (CH), 2091, 1477, 1439 (SO), 1363, 1249, 1185, 1154, 1071 (SC), 970, 843, 758. TLC:  $R_f$ (EtOAc) = 0.35. EA, C: 49.713%, H: 8.388%, N: 17.643%, S: 9.832%.

### Intramolecular Huisgen reaction of **7wx** gives triazole **14w**

(*S*)-*N*-((*S*)-4,5,6,7-Tetrahydro-[1,2,3]triazolo[1,5-*a*]pyridine-4-yl)-*tert*-butylsulfinamide (**14w**)

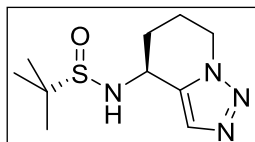

A solution of **7wx** in  $\text{CDCl}_3$  was monitored for 7 d via NMR spectroscopy at rt. The conversion of the starting material was 66 %.

$^1\text{H}$  NMR (600 MHz, Chloroform-*d*)  $\delta$  = 7.86 (s, 1H,  $\text{C}=\text{CH}$ ), 4.66 (dd,  $^3J$  = 8.1 Hz,  $^3J$  = 5.4 Hz, 1H,  $\text{C}^{\alpha}\text{H}$ ), 4.40 (dt,  $^2J$  = 13.1 Hz,  $^3J$  = 5.2 Hz, 2H,  $\text{N}_3\text{CH}_2$ ), 4.30 (ddd,  $^2J$  = 13.5 Hz,  $^3J$  = 8.6 Hz,  $^3J$  = 5.0 Hz, 1H,  $\text{N}_3\text{CH}_2$ ), 3.59 (d,  $^3J$  = 5.8 Hz,  $\text{NH}$ ), 2.29 (ddtd,  $^2J$  = 12.2 Hz,  $^3J$  = 6.8 Hz,  $^3J$  = 4.9 Hz,  $^4J$  = 1.8 Hz, 1H,  $\text{C}^{\alpha}\text{CH}_2$ ), 2.23 (tdd,  $^3J$  = 7.6 Hz,  $^3J$  = 5.6 Hz,  $^3J$  = 3.1 Hz, 1H,  $\text{N}_3\text{CH}_2\text{CH}_2$ ), 2.06 (ddtd,  $^2J$  = 11.6 Hz,  $^3J$  = 8.5 Hz,  $^3J$  = 6.5 Hz,  $^3J$  = 6.0 Hz,  $^4J$  = 2.9 Hz, 1H,  $\text{N}_3\text{CH}_2\text{CH}_2$ ), 1.98 (dddd,  $^2J$  = 13.3 Hz,  $^3J$  = 10.6 Hz,  $^3J$  = 7.9 Hz,  $^4J$  = 2.1 Hz, 1H,  $\text{C}^{\alpha}\text{H}_2$ ), 1.25 (s, 9H,  $\text{C}(\text{CH}_3)_3$ ).  $^{13}\text{C}$  NMR (126 MHz, Chloroform-*d*)  $\delta$  = 135.8 ( $\text{C}=\text{CH}$ ), 132.5 ( $\text{C}=\text{CH}$ ), 56.1 ( $\text{C}(\text{CH}_3)_3$ ), 48.5 ( $\text{C}^{\alpha}$ ), 45.7 ( $\text{N}_3\text{CH}_2$ ), 29.3 ( $\text{C}^{\alpha}\text{CH}_2$ ), 22.6 ( $\text{C}(\text{CH}_3)_3$ ), 20.3 ( $\text{N}_3\text{CH}_2\text{CH}_2$ ).  $\text{C}_{10}\text{H}_{18}\text{N}_4\text{OS}$  (242.34 g mol $^{-1}$ ). MS(ESI):  $m/z$  = 243.1268 (243.12741  $[\text{M}+\text{H}]^+$ ).

## References

1. Dolomanov, O. V.; Bourhis, L. J.; Gildea, R. J.; Howard, J. a. K.; Puschmann, H. J. *Appl. Crystallogr.* **2009**, *42*, 339-341.
2. Sheldrick, G. M. *Acta Crystallogr. A* **2008**, *64*, 112-122.
3. Liu, G.; Cogan, D. A.; Owens, T. D.; Tang, T. P.; Ellman, J. A. *J. Org. Chem.* **1999**, *64*, 1278-1284.
4. Datta, G. K.; Ellman, J. A. *J. Org. Chem.* **2010**, *75*, 6283-6285.
5. Collados, J. F.; Toledano, E.; Guijarro, D.; Yus, M. *J. Org. Chem.* **2012**, *77*, 5744-5750.
6. Liu, G.; Cogan, D. A.; Ellman, J. A. *J. Am. Chem. Soc.* **1997**, *119*, 9913-9914.
7. Robak, M. T.; Herbage, M. A.; Ellman, J. A. *Chem. Rev.* **2010**, *110*, 3600-3740.
8. Levin, V. V.; Dilman, A. D.; Belyakov, P. A.; Struchkova, M. I.; Tartakovsky, V. A. *Eur. J. Org. Chem.* **2008**, *31*, 5226-5230.
9. Cogan, D. A.; Liu, G.; Ellman, J. *Tetrahedron* **1999**, *55*, 8883-8904.
10. Patterson, A. W.; Ellman, J. A. *J. Org. Chem.* **2006**, *71*, 7110-7112.
11. Guijarro, D.; Pablo, Ó.; Yus, M. *Tetrahedron Lett.* **2009**, *50*, 5386-5388.
12. Moura-Letts, G.; DiBlasi, C. M.; Bauer, R. A.; Tan, D. S. *Proc. Natl. Acad. Sci. U. S. A.* **2011**, *108*, 6745-6750.
13. Chen, B.-L.; Wang, B.; Lin, G.-Q. *J. Org. Chem.* **2010**, *75*, 941-944.
14. Ding, C.-H.; Chen, D.-D.; Luo, Z.-B.; Dai, L.-X.; Hou, X.-L. *Synlett* **2006**, *08*, 1272-1274.
15. Carreira, E. M.; Du Bois, J. *J. Am. Chem. Soc.* **1995**, *117*, 8106-8125.
16. Nishikawa, T.; Ino, A.; Isobe, M. *Tetrahedron* **1994**, *50*, 1449-1468.
17. Alzeer, J.; Vasella, A. *Helv. Chim. Acta* **1995**, *78*, 177-193.
18. Ernst, A.; Gobbi, L.; Vasella, A. *Tetrahedron Lett.* **1996**, *37*, 7959-7962.
19. Mancuso, A. J.; Huang, S.-L.; Swern, D. *J. Org. Chem.* **1978**, *43*, 2480-2482.
20. Hashmi, A. S. K.; Haufe, P.; Rivas Nass, A.; Bats, J. W. *Adv. Synth. Catal.* **2004**, *346*, 421-424.
21. Ishida, T.; Kobayashi, R.; Yamada, T. *Org. Lett.* **2014**, *16*, 2430-2433.
22. Wong, V. H. L.; White, A. J. P.; Hor, T. S. A.; Hii, K. K. M. *Adv. Synth. Catal.* **2015**, *357*, 3943-3948.
23. Soler, R.; Cacchi, S.; Fabrizi, G.; Forte, G.; Martín, L.; Martínez, S.; Molins, E.; Moreno-Mañas, M.; Petrucci, F.; Roig, A.; Sebastián, R. M.; Vallribera, A. *Synthesis* **2007**, *19*, 3068-3072.
24. Chuang, C. P.; Gallucci, J. C.; Hart, D. J. *J. Org. Chem.* **1988**, *53*, 3210-3218.
25. Moser, H.; Lu, Q.; Patten, P.; Wang, D.; Kasar, R.; Kaldor, S.; Patterson, B. Preparation of Antibacterial Agents, US66766, publ. date **2008**.
26. Ferreira, F.; Audouin, M.; Chemla, F. *Chem. - Eur. J.* **2005**, *11*, 5269-5278.
27. Tang, T. P.; Ellman, J. A. *J. Org. Chem.* **1999**, *64*, 12-13.
28. Staas, D. D.; Savage, K. L.; Homnick, C. F.; Tsou, N. N.; Ball, R. G. *J. Org. Chem.* **2002**, *67*, 8276-8279.
29. Ye, L.; He, W.; Zhang, L. *Angew. Chem. Int. Ed.* **2011**, *50*, 3236-3239.
30. Prakash, G. K. S.; Mandal, M.; Olah, G. A. *Angew. Chem. Int. Ed Engl.* **2001**, *40*, 589-590.
31. Gross, S.; Heuser, S.; Ammer, C.; Heckmann, G.; Bach, T. *Synthesis* **2011**, *2*, 199-206.
32. Yao, Q.; Yuan, C. *J. Org. Chem.* **2013**, *78*, 6962-6974.
33. García Ruano, J.; Fernández, I.; Prado, C. M.; del Cruz, A. A. *Tetrahedron Asymmetry* **1996**, *7*, 3407-3414.

34. Greier, G. Synthesis of Novel Trifluormethyl-Substitued Thienothiazines, Dissertation, Vienna University of Technology, **1983**.
35. Truong, V. L.; Ménard, M. S.; Ménard, M. S.; Dion, I. *Org. Lett.* **2007**, *9*, 683-685.
36. Fenneteau, J.; Vallerotto, S.; Ferrié, L.; Figadère, B. *Tetrahedron Lett.* **2015**, *56*, 3758-3761.
37. Tang, T. P.; Volkman, S. K.; Ellman, J. A. *J. Org. Chem.* **2001**, *66*, 8772-8778.
38. Roth, S.; Stark, C. B. W. *Angew. Chem. Int. Ed.* **2006**, *45*, 6218-6221.
39. Karmann, L.; Kazmaier, U. *Eur. J. Org. Chem.* **2013**, *31*, 7101-7109.
40. Zhdanko, A. G.; Gulevich, A. V.; Nenajdenko, V. G. *Tetrahedron* **2009**, *65*, 4692-4702.
41. Sasano, Y.; Nagasawa, S.; Yamazaki, M.; Shibuya, M.; Park, J.; Iwabuchi, Y. *Angew. Chem. Int. Ed.* **2014**, *53*, 3236-3240.
42. Srinivasan, R.; Uttamchandani, M.; Yao, S. Q. *Org. Lett.* **2006**, *8*, 713-716.
43. Chen, S.; Zhao, X.; Chen, J.; Chen, J.; Kuznetsova, L.; Wong, S. S.; Ojima, I. *Bioconjug. Chem.* **2010**, *21*, 979-987.
44. Asano, K.; Matsubara, S. *J. Am. Chem. Soc.* **2011**, *133*, 16711-16713.
45. Bauer, R. A.; DiBlasi, C. M.; Tan, D. S. *Org. Lett.* **2010**, *12*, 2084-2087.
46. Wang, T.; Wu, Y.; Kuan, S. L.; Dumele, O.; Lamla, M.; Ng, D. Y. W.; Arzt, M.; Thomas, J.; Mueller, J. O.; Barner-Kowollik, C.; Weil, T. *Chem. - Eur. J.* **2015**, *21*, 228-238.
47. Bachl, J.; Mayr, J.; Sayago, F. J.; Cativiela, C.; Díaz, D. D. *Chem. Commun.* **2015**, *51*, 5294-5297.
48. Shu, C.; Liu, M.-Q.; Wang, S.-S.; Li, L.; Ye, L.-W. *J. Org. Chem.* **2013**, *78*, 3292-3299.
49. Burke, M. J.; Cogan, D.; Gao, D. A.; Heim-Riether, A.; Hickey, E. R.; Ramsden, P. D.; Thompson, D. C.; Xiong, Z., Azolyl substituted carbonitrile derivatives as cathepsin S inhibitors and their preparation and use for the treatment of diseases, *PCT Int. Appl.* **2011**.
50. Jordan, S.; Starks, S. A.; Whatley, M. F.; Turlington, M. *Org. Lett.* **2015**, *17*, 4842-4845.
51. Verrier, C.; Carret, S.; Poisson, J.-F. *Org. Biomol. Chem.* **2014**, *12*, 1875-1878.
52. Basel, Y.; Hassner, A. *Synthesis* **2001**, *4*, 0550-0552.
53. Packer, G.; Malassis, J.; Wells, N.; Light, M.; Linclau, B. *Tetrahedron Asymmetry* **2017**, *28*, 539-544.

## X-ray structure analysis

Details of crystal and refinement data can be found in Table S1. CCDC 1566791 - CCDC 1566804 contain the supplementary crystallographic data for this paper. These data can be obtained free of charge from The Cambridge Crystallographic Data Centre via [www.ccdc.cam.ac.uk/data\\_request/cif](http://www.ccdc.cam.ac.uk/data_request/cif).

Table S1: Crystal and refinement data.

| Identification code                         | <b>7a</b>                                         | <b>7c</b>                                         | <b>7d</b>                                         |
|---------------------------------------------|---------------------------------------------------|---------------------------------------------------|---------------------------------------------------|
| Empirical formula                           | C <sub>8</sub> H <sub>15</sub> NOS                | C <sub>11</sub> H <sub>21</sub> NOS               | C <sub>13</sub> H <sub>23</sub> NOS               |
| Formula weight                              | 173.27                                            | 215.35                                            | 241.38                                            |
| Crystal system                              | orthorhombic                                      | orthorhombic                                      | monoclinic                                        |
| Space group                                 | P2 <sub>1</sub> 2 <sub>1</sub> 2 <sub>1</sub>     | P2 <sub>1</sub> 2 <sub>1</sub> 2 <sub>1</sub>     | I2                                                |
| a/Å                                         | 8.7104(4)                                         | 7.42311(6)                                        | 15.2100(2)                                        |
| b/Å                                         | 8.8865(3)                                         | 8.20918(9)                                        | 5.52038(7)                                        |
| c/Å                                         | 12.8249(5)                                        | 21.5429(2)                                        | 16.9739(2)                                        |
| β/°                                         |                                                   |                                                   | 105.2626(14)                                      |
| Volume/Å <sup>3</sup>                       | 992.71(6)                                         | 1312.77(2)                                        | 1374.95(3)                                        |
| Z                                           | 4                                                 | 4                                                 | 4                                                 |
| ρ <sub>calc</sub> /mg/mm <sup>3</sup>       | 1.156                                             | 1.090                                             | 1.166                                             |
| μ/mm <sup>-1</sup>                          | 2.489                                             | 1.965                                             | 1.929                                             |
| F(000)                                      | 376.0                                             | 472.0                                             | 528.0                                             |
| Crystal size/mm <sup>3</sup>                | 0.306 × 0.19 × 0.178                              | 0.3786 × 0.2147 × 0.0328                          | 0.3786 × 0.1633 × 0.0951                          |
| 2θ range for data collection                | 12.116 to 143.96°                                 | 8.2 to 152.8854°                                  | 6.95 to 143.932°                                  |
| Index ranges                                | -10 ≤ h ≤ 10, -10 ≤ k ≤ 10, -15 ≤ l ≤ 15          | -9 ≤ h ≤ 9, -9 ≤ k ≤ 10, -26 ≤ l ≤ 26             | -18 ≤ h ≤ 18, -6 ≤ k ≤ 6, -20 ≤ l ≤ 20            |
| Reflections collected                       | 35722                                             | 52103                                             | 24224                                             |
| Independent reflections                     | 1942[R(int) = 0.0235]                             | = 2663[R(int) = 0.0338]                           | = 2673[R(int) = 0.0348]                           |
| Reflections with [I ≥ 2σ (I)]               | 1942                                              | 2604                                              | 2657                                              |
| Completeness / Θ full                       | 0.99 / 72.0°                                      | 0.99 / 76.4                                       | 0.99 / 72.0                                       |
| Data/restraints/parameters                  | 1942/0/108                                        | 2663/0/136                                        | 2673/1/237                                        |
| Goodness-of-fit on F <sup>2</sup>           | 1.101                                             | 1.038                                             | 1.037                                             |
| Final R indexes [I ≥ 2σ (I)]                | R <sub>1</sub> = 0.0182, wR <sub>2</sub> = 0.0500 | R <sub>1</sub> = 0.0210, wR <sub>2</sub> = 0.0555 | R <sub>1</sub> = 0.0237, wR <sub>2</sub> = 0.0632 |
| Final R indexes [all data]                  | R <sub>1</sub> = 0.0182, wR <sub>2</sub> = 0.0500 | R <sub>1</sub> = 0.0216, wR <sub>2</sub> = 0.0561 | R <sub>1</sub> = 0.0238, wR <sub>2</sub> = 0.0633 |
| Largest diff. peak/hole / e Å <sup>-3</sup> | 0.16/-0.19                                        | 0.18/-0.22                                        | 0.17/-0.18                                        |
| Flack parameter                             | 0.002(3)                                          | -0.015(11)                                        | -0.008(7)                                         |

CCDC                                      1566791                                      1566792                                      1566793

| Identification code                         | <b>7e</b>                                         | <b>7i</b>                                         | <b>7j</b>                                          |
|---------------------------------------------|---------------------------------------------------|---------------------------------------------------|----------------------------------------------------|
| Empirical formula                           | C <sub>11</sub> H <sub>21</sub> NOS               | C <sub>13</sub> H <sub>17.03</sub> NOS            | C <sub>13</sub> H <sub>12</sub> F <sub>5</sub> NOS |
| Formula weight                              | 215.35                                            | 235.37                                            | 325.30                                             |
| Crystal system                              | orthorhombic                                      | monoclinic                                        | monoclinic                                         |
| Space group                                 | P2 <sub>1</sub> 2 <sub>1</sub> 2 <sub>1</sub>     | P2 <sub>1</sub> /c                                | I2                                                 |
| a/Å                                         | 7.51335(10)                                       | 19.2823(6)                                        | 16.0227(4)                                         |
| b/Å                                         | 9.18409(9)                                        | 6.0708(2)                                         | 5.58447(14)                                        |
| c/Å                                         | 18.8630(2)                                        | 21.7783(7)                                        | 17.1518(4)                                         |
| β/°                                         |                                                   | 93.696(3)                                         | 112.519(3)                                         |
| Volume/Å <sup>3</sup>                       | 1301.61(3)                                        | 2544.02(14)                                       | 1417.70(6)                                         |
| Z                                           | 4                                                 | 8                                                 | 4                                                  |
| ρ <sub>calc</sub> /mg/mm <sup>3</sup>       | 1.099                                             | 1.229                                             | 1.524                                              |
| μ/mm <sup>-1</sup>                          | 1.982                                             | 2.084                                             | 2.571                                              |
| F(000)                                      | 472.0                                             | 1008.0                                            | 664.0                                              |
| Crystal size/mm <sup>3</sup>                | 0.359 × 0.094 × 0.041                             | 0.1499 × 0.0586 × 0.02                            | 0.362 × 0.125 × 0.092                              |
| 2θ range for data collection                | 10.7 to 144.6°                                    | 8.136 to 134.09                                   | 6.424 to 144.044°                                  |
| Index ranges                                | -9 ≤ h ≤ 9, -11 ≤ k ≤ 11, -23 ≤ l ≤ 23            | -22 ≤ h ≤ 22, -7 ≤ k ≤ 7, -25 ≤ l ≤ 24            | -19 ≤ h ≤ 19, -6 ≤ k ≤ 5, -21 ≤ l ≤ 21             |
| Reflections collected                       | 21947                                             | 40018                                             | 10869                                              |
| Independent reflections                     | 2578[R(int) = 0.0389]                             | 4506 [R <sub>int</sub> = 0.0445]                  | 2574[R(int) = 0.0242]                              |
| Reflections with [I ≥ 2σ (I)]               | 2544                                              | 3847                                              | 2536                                               |
| Completeness / Θ full                       | 1.00 / 67.7°                                      | 0.99 / 67.0                                       | 1.00 / 72.0                                        |
| Data/restraints/parameters                  | 2578/0/137                                        | 4506/0/408                                        | 2574/1/207                                         |
| Goodness-of-fit on F <sup>2</sup>           | 1.039                                             | 1.051                                             | 1.035                                              |
| Final R indexes [I ≥ 2σ (I)]                | R <sub>1</sub> = 0.0226, wR <sub>2</sub> = 0.0589 | R <sub>1</sub> = 0.0457, wR <sub>2</sub> = 0.1275 | R <sub>1</sub> = 0.0296, wR <sub>2</sub> = 0.0810  |
| Final R indexes [all data]                  | R <sub>1</sub> = 0.0230, wR <sub>2</sub> = 0.0592 | R <sub>1</sub> = 0.0536, wR <sub>2</sub> = 0.1352 | R <sub>1</sub> = 0.0300, wR <sub>2</sub> = 0.0815  |
| Largest diff. peak/hole / e Å <sup>-3</sup> | 0.18/-0.20                                        | 0.51/-0.46                                        | 0.26/-0.21                                         |
| Flack parameter                             | -0.017(7)                                         |                                                   | -0.010(14)                                         |
| CCDC                                        | 1566794                                           | 1566795                                           | 1566796                                            |

| Identification code | <b>7k</b>                                         | <b>7q</b>                                         | <b>7s</b>                                         |
|---------------------|---------------------------------------------------|---------------------------------------------------|---------------------------------------------------|
| Empirical formula   | C <sub>8</sub> H <sub>12</sub> F <sub>3</sub> NOS | C <sub>11</sub> H <sub>18</sub> N <sub>2</sub> OS | C <sub>14</sub> H <sub>25</sub> NO <sub>3</sub> S |
| Formula weight      | 227.25                                            | 226.33                                            | 287.41                                            |
| Crystal system      | orthorhombic                                      | orthorhombic                                      | orthorhombic                                      |
| Space group         | P2 <sub>1</sub> 2 <sub>1</sub> 2 <sub>1</sub>     | P2 <sub>1</sub> 2 <sub>1</sub> 2 <sub>1</sub>     | P2 <sub>1</sub> 2 <sub>1</sub> 2 <sub>1</sub>     |
| a/Å                 | 9.8970(3)                                         | 7.61092(13)                                       | 5.99613(6)                                        |
| b/Å                 | 10.5858(4)                                        | 8.47774(13)                                       | 11.66404(10)                                      |

|                                             |                                                   |                                                   |                                                   |
|---------------------------------------------|---------------------------------------------------|---------------------------------------------------|---------------------------------------------------|
| c/Å                                         | 31.7578(12)                                       | 20.0077(4)                                        | 23.4991(2)                                        |
| Volume/Å <sup>3</sup>                       | 3327.2(2)                                         | 1290.96(4)                                        | 1643.51(3)                                        |
| Z                                           | 12                                                | 4                                                 | 4                                                 |
| ρ <sub>calc</sub> /mg/mm <sup>3</sup>       | 1.361                                             | 1.163                                             | 1.162                                             |
| μ/mm <sup>-1</sup>                          | 2.766                                             | 2.051                                             | 1.784                                             |
| F(000)                                      | 1416.0                                            | 488.0                                             | 624.0                                             |
| Crystal size/mm <sup>3</sup>                | 0.28 × 0.04 × 0.02                                | 0.495 × 0.33 × 0.225                              | 0.656 × 0.284 × 0.082                             |
| 2Θ range for data collection                | 5.566 to 143.994°                                 | 8.8 to 144.7°                                     | 7.5 to 144.7°                                     |
| Index ranges                                | -12 ≤ h ≤ 12, -13 ≤ k ≤ 13, -39 ≤ l ≤ 37          | -9 ≤ h ≤ 8, -10 ≤ k ≤ 10, -24 ≤ l ≤ 24            | -7 ≤ h ≤ 7, -14 ≤ k ≤ 14, -29 ≤ l ≤ 29            |
| Reflections collected                       | 58973                                             | 18319                                             | 26461                                             |
| Independent reflections                     | 6525[R(int) = 0.1078]                             | 2547[R(int) = 0.0234]                             | 3249[R(int) = 0.0557]                             |
| Data/restraints/parameters                  | 6525/3/387                                        | 2547/0/191                                        | 3249/0/182                                        |
| Reflections with [I ≥ 2σ (I)]               | 5599                                              | 2541                                              | 3215                                              |
| Completeness / Θ full                       | 1.00 / 77.0                                       | 1.00 / 67.7°                                      | 1.00 / 67.7°                                      |
| Goodness-of-fit on F <sup>2</sup>           | 1.045                                             | 1.109                                             | 1.042                                             |
| Final R indexes [I ≥ 2σ (I)]                | R <sub>1</sub> = 0.0522, wR <sub>2</sub> = 0.1336 | R <sub>1</sub> = 0.0204, wR <sub>2</sub> = 0.0550 | R <sub>1</sub> = 0.0253, wR <sub>2</sub> = 0.0677 |
| Final R indexes [all data]                  | R <sub>1</sub> = 0.0627, wR <sub>2</sub> = 0.1419 | R <sub>1</sub> = 0.0204, wR <sub>2</sub> = 0.0550 | R <sub>1</sub> = 0.0256, wR <sub>2</sub> = 0.0680 |
| Largest diff. peak/hole / e Å <sup>-3</sup> | 0.61/-0.46                                        | 0.16/-0.26                                        | 0.23/-0.25                                        |
| Flack parameter                             | -0.008(10)                                        | 0.003(4)                                          | -0.003(7)                                         |
| CCDC                                        | 1566797                                           | 1566798                                           | 1566799                                           |

| Identification code                   | <b>10k</b>                                        | <b>11i</b>                                        | <b>12i</b>                                        |
|---------------------------------------|---------------------------------------------------|---------------------------------------------------|---------------------------------------------------|
| Empirical formula                     | C <sub>7</sub> H <sub>14</sub> F <sub>3</sub> NOS | C <sub>21</sub> H <sub>23</sub> NO <sub>3</sub> S | C <sub>21</sub> H <sub>24</sub> NO <sub>3</sub> S |
| Formula weight                        | 217.25                                            | 369.46                                            | 370.47                                            |
| Crystal system                        | orthorhombic                                      | monoclinic                                        | orthorhombic                                      |
| Space group                           | P2 <sub>1</sub> 2 <sub>1</sub> 2 <sub>1</sub>     | P2 <sub>1</sub>                                   | P2 <sub>1</sub> 2 <sub>1</sub> 2 <sub>1</sub>     |
| a/Å                                   | 5.81687(9)                                        | 10.3754(9)                                        | 6.03357(10)                                       |
| b/Å                                   | 9.36864(17)                                       | 5.8828(3)                                         | 10.31093(18)                                      |
| c/Å                                   | 18.6951(3)                                        | 15.9341(16)                                       | 31.0591(6)                                        |
| β/°                                   |                                                   | 101.162(8)                                        |                                                   |
| Volume/Å <sup>3</sup>                 | 1018.81(3)                                        | 954.17(14)                                        | 1932.24(6)                                        |
| Z                                     | 4                                                 | 2                                                 | 4                                                 |
| ρ <sub>calc</sub> /mg/mm <sup>3</sup> | 1.416                                             | 1.288                                             | 1.274                                             |
| μ/mm <sup>-1</sup>                    | 0.325                                             | 1.668                                             | 1.648                                             |
| F(000)                                | 456.0                                             | 392.0                                             | 788.0                                             |
| Crystal size/mm <sup>3</sup>          | 0.383 × 0.143 × 0.104                             | 0.358 × 0.071 × 0.02                              | 0.2716 × 0.123 × 0.028                            |
| 2Θ range for data collection          | 4.4 to 60.1°                                      | 5.654 to 143.896°                                 | 9.036 to 143.992°                                 |

|                                                |                                                            |                                                            |                                                            |
|------------------------------------------------|------------------------------------------------------------|------------------------------------------------------------|------------------------------------------------------------|
| Index ranges                                   | $-8 \leq h \leq 8, -13 \leq k \leq 13, -26 \leq l \leq 26$ | $-12 \leq h \leq 11, -7 \leq k \leq 7, -19 \leq l \leq 19$ | $-7 \leq h \leq 7, -12 \leq k \leq 12, -38 \leq l \leq 38$ |
| Reflections collected                          | 24538                                                      | 19976                                                      | 47179                                                      |
| Independent reflections                        | 2991[R(int) = 0.0404]                                      | 5148[R(int) = 0.0726]                                      | 3806[R(int) = 0.0443]                                      |
| Reflections with $[I \geq 2\sigma(I)]$         | 2865                                                       | 4697                                                       | 3719                                                       |
| Completeness / $\Theta$ full                   | 1.00 / 25.2°                                               | 1.00 / 71.9                                                | 1.00 / 72.0                                                |
| Data/restraints/parameters                     | 2991/0/174                                                 | 5148/1/244                                                 | 3806/0/239                                                 |
| Goodness-of-fit on $F^2$                       | 1.103                                                      | 1.128                                                      | 1.039                                                      |
| Final R indexes $[I \geq 2\sigma(I)]$          | $R_1 = 0.0237, wR_2 = 0.0588$                              | $R_1 = 0.0574, wR_2 = 0.1628$                              | $R_1 = 0.0382, wR_2 = 0.0996$                              |
| Final R indexes [all data]                     | $R_1 = 0.0253, wR_2 = 0.0597$                              | $R_1 = 0.0613, wR_2 = 0.1651$                              | $R_1 = 0.0391, wR_2 = 0.1005$                              |
| Largest diff. peak/hole / $e \text{ \AA}^{-3}$ | 0.24/-0.18                                                 | 0.72/-0.45                                                 | 0.82/-0.41                                                 |
| Flack parameter                                | 0.00(3)                                                    | -0.03(3)                                                   | 0.004(5)                                                   |
| CCDC                                           | 1566800                                                    | 1566801                                                    | 1566802                                                    |

| Identification code                    | <b>12i</b>                                                  | <b>13w</b>                                                   |
|----------------------------------------|-------------------------------------------------------------|--------------------------------------------------------------|
| Empirical formula                      | $C_{11}H_7F_3O_3$                                           | $C_{13}H_{26}N_4OSSi$                                        |
| Formula weight                         | 244.17                                                      | 314.53                                                       |
| Crystal system                         | monoclinic                                                  | orthorhombic                                                 |
| Space group                            | C2/c                                                        | P2 <sub>1</sub> 2 <sub>1</sub> 2 <sub>1</sub>                |
| a/Å                                    | 15.9688(11)                                                 | 8.6570(8)                                                    |
| b/Å                                    | 10.3072(7)                                                  | 11.4855(4)                                                   |
| c/Å                                    | 13.6073(13)                                                 | 16.8678(7)                                                   |
| $\beta/^\circ$                         | 104.846(8)                                                  |                                                              |
| Volume/Å <sup>3</sup>                  | 2164.9(3)                                                   | 1677.17(18)                                                  |
| Z                                      | 8                                                           | 4                                                            |
| $\rho_{\text{calc}}/\text{mg/mm}^3$    | 1.498                                                       | 1.246                                                        |
| $\mu/\text{mm}^{-1}$                   | 0.141                                                       | 2.414                                                        |
| F(000)                                 | 992.0                                                       | 680.0                                                        |
| Crystal size/mm <sup>3</sup>           | 0.393 × 0.307 × 0.193                                       | 0.12 × 0.098 × 0.024                                         |
| 2 $\Theta$ range for data collection   | 4.8 to 52.0°                                                | 9.3 to 152.4°                                                |
| Index ranges                           | $-17 \leq h \leq 19, -12 \leq k \leq 7, -16 \leq l \leq 13$ | $-10 \leq h \leq 10, -14 \leq k \leq 14, -21 \leq l \leq 20$ |
| Reflections collected                  | 4376                                                        | 64158                                                        |
| Independent reflections                | 2089[R(int) = 0.0339]                                       | 3495[R(int) = 0.0390]                                        |
| Reflections with $[I \geq 2\sigma(I)]$ | 1473                                                        | 3451                                                         |
| Completeness / $\Theta$ full           | 0.97 / 26.0°                                                | 1.00 / 67.7°                                                 |
| Data/restraints/parameters             | 2089/0/182                                                  | 3495/0/191                                                   |



|                                                |                                  |                                  |
|------------------------------------------------|----------------------------------|----------------------------------|
| Goodness-of-fit on $F^2$                       | 1.060                            | 1.046                            |
| Final R indexes [ $I \geq 2\sigma$ (I)]        | $R_1 = 0.0509$ , $wR_2 = 0.1105$ | $R_1 = 0.0203$ , $wR_2 = 0.0525$ |
| Final R indexes [all data]                     | $R_1 = 0.0798$ , $wR_2 = 0.1307$ | $R_1 = 0.0207$ , $wR_2 = 0.0528$ |
| Largest diff. peak/hole / $e \text{ \AA}^{-3}$ | 0.28/-0.30                       | 0.19/-0.26                       |
| Flack parameter                                |                                  | -0.012(4)                        |
| CCDC                                           | 1566803                          | 1566804                          |

(*S*)-*N*-((*S*)-But-3-yn-2-yl)-2-methylpropane-2-sulfinamide (**7a**)

Single crystals of  $C_8H_{15}NOS$  (**7a**) were achieved out of a saturated solution in *n*-hexane.

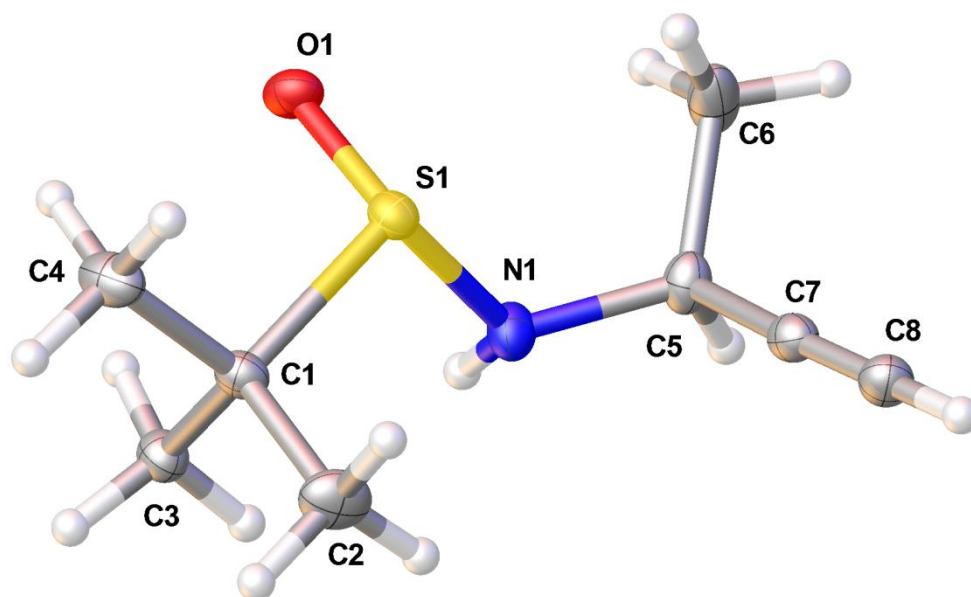

Table S2: Fractional Atomic Coordinates ( $\times 10^4$ ) and Equivalent Isotropic Displacement Parameters ( $\text{\AA}^2 \times 10^3$ ) for **7a**.  $U_{\text{eq}}$  is defined as 1/3 of the trace of the orthogonalised  $U_{ij}$  tensor.

| Atom | x          | y          | z          | U(eq)     |
|------|------------|------------|------------|-----------|
| S1   | 4843.9(4)  | 4082.3(4)  | 3561.6(3)  | 17.22(10) |
| O1   | 5343.1(12) | 3554.0(11) | 2502.1(8)  | 22.0(3)   |
| N1   | 3965.5(14) | 5716.5(15) | 3484(1)    | 20.7(3)   |
| C1   | 6627.7(17) | 4706.0(17) | 4201.2(11) | 18.1(3)   |
| C2   | 6204(2)    | 5205(2)    | 5303.7(13) | 28.6(4)   |
| C3   | 7377.5(16) | 5951.2(17) | 3568.0(12) | 19.9(3)   |
| C4   | 7643(2)    | 3305.6(18) | 4228.9(13) | 25.7(3)   |
| C5   | 2269.5(16) | 5753.4(19) | 3434.2(11) | 20.9(3)   |
| C6   | 1557.4(19) | 4628(2)    | 2681.1(12) | 30.8(4)   |
| C7   | 1596.3(17) | 5604.3(16) | 4487.0(11) | 18.8(3)   |
| C8   | 974.7(17)  | 5521.9(17) | 5305.8(12) | 21.2(3)   |

(*S*)-2-Methyl-*N*-((*S*)-5-methylhex-1-yn-3-yl)propane-2-sulfinamide (**7c**)

Single crystals of  $\text{C}_{11}\text{H}_{21}\text{NOS}$  (**7c**) were achieved out of a saturated solution in  $\text{Et}_2\text{O}$ .

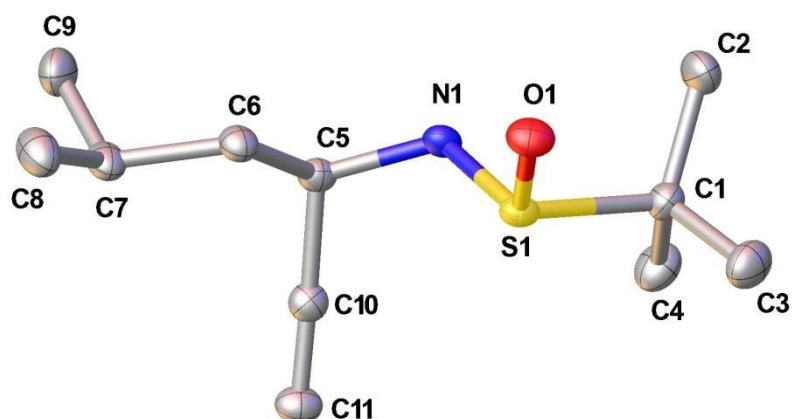

Table S3: Fractional Atomic Coordinates ( $\times 10^4$ ) and Equivalent Isotropic Displacement Parameters ( $\text{\AA}^2 \times 10^3$ ) for **7c**.  $U_{\text{eq}}$  is defined as 1/3 of the trace of the orthogonalised  $U_{ij}$  tensor.

|      | x       | y       | z       | U(eq) |
|------|---------|---------|---------|-------|
| S(1) | 7880(1) | 7020(1) | 2111(1) | 17(1) |
| O(1) | 9617(1) | 6189(1) | 2274(1) | 24(1) |
| N(1) | 7693(1) | 8762(1) | 2485(1) | 19(1) |

|       |         |         |         |       |
|-------|---------|---------|---------|-------|
| C(1)  | 8254(2) | 7839(2) | 1325(1) | 22(1) |
| C(2)  | 9956(2) | 8868(2) | 1310(1) | 31(1) |
| C(3)  | 8447(2) | 6331(2) | 915(1)  | 32(1) |
| C(4)  | 6580(2) | 8818(2) | 1151(1) | 30(1) |
| C(5)  | 6535(2) | 8811(2) | 3041(1) | 19(1) |
| C(6)  | 7264(2) | 7802(2) | 3587(1) | 21(1) |
| C(7)  | 6238(2) | 8029(2) | 4198(1) | 24(1) |
| C(8)  | 6802(2) | 6743(2) | 4668(1) | 33(1) |
| C(9)  | 6522(2) | 9737(2) | 4466(1) | 33(1) |
| C(10) | 4686(2) | 8300(1) | 2880(1) | 20(1) |
| C(11) | 3203(2) | 7854(2) | 2767(1) | 24(1) |

---

(*S*)-*N*-((*S*)-1-Cyclohexylprop-2-yn-1-yl)-2-methylpropane-2-sulfinamide (**7d**)

Single crystals of C<sub>13</sub>H<sub>23</sub>NOS (**7d**) were achieved out of a saturated solution in Et<sub>2</sub>O.

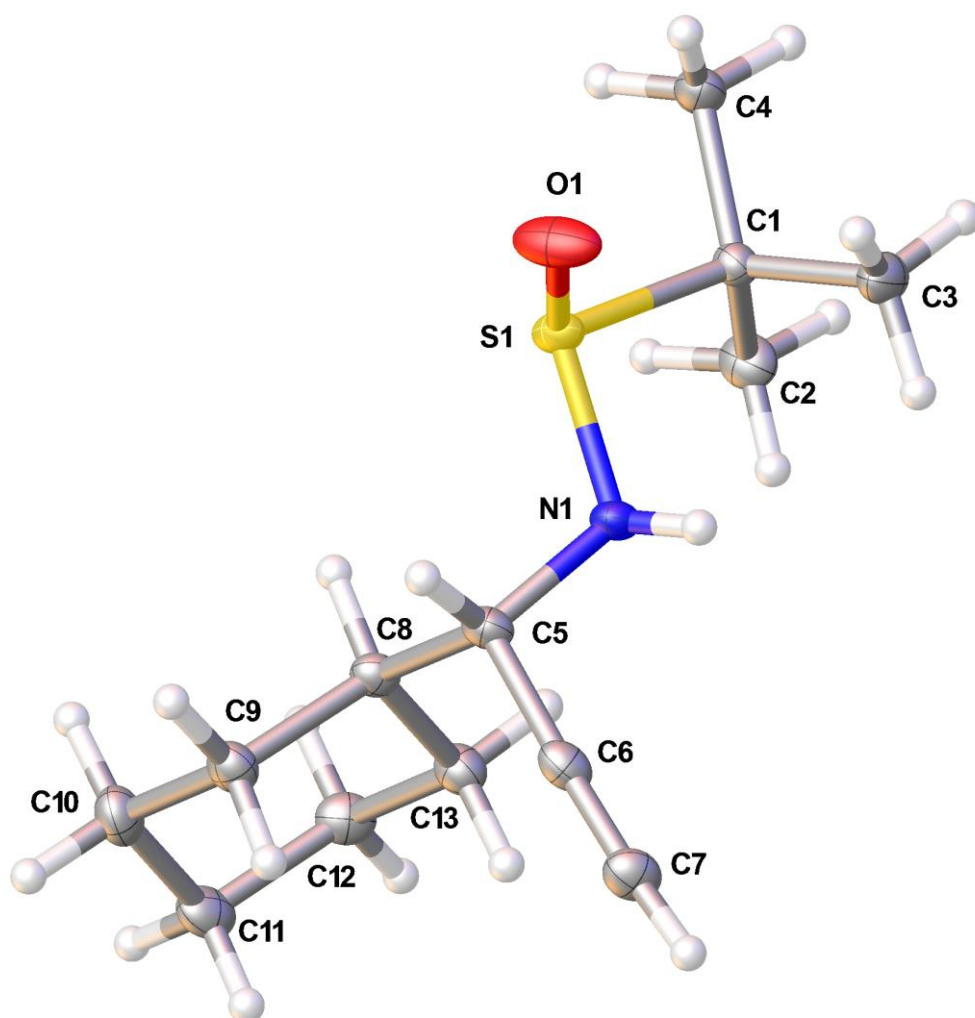

Table S4: Fractional Atomic Coordinates ( $\times 10^4$ ) and Equivalent Isotropic Displacement Parameters ( $\text{\AA}^2 \times 10^3$ ) for **7d**.  $U_{\text{eq}}$  is defined as 1/3 of of the trace of the orthogonalised  $U_{\text{H}}$  tensor.

| Atom | <i>x</i>   | <i>y</i>  | <i>z</i>   | <i>U</i> (eq) |
|------|------------|-----------|------------|---------------|
| S1   | 4850.7(3)  | 7186.4(8) | 2984.7(2)  | 18.86(13)     |
| O1   | 4233.6(11) | 5726(3)   | 3346.1(8)  | 35.4(4)       |
| N1   | 5283.8(10) | 9543(3)   | 3577.4(9)  | 18.8(3)       |
| C1   | 4100.5(11) | 8906(4)   | 2140(1)    | 16.4(3)       |
| C2   | 4697.8(13) | 10562(4)  | 1782.7(12) | 23.7(4)       |

|     |            |          |            |         |
|-----|------------|----------|------------|---------|
| C3  | 3384.1(13) | 10288(4) | 2437.4(13) | 24.9(4) |
| C4  | 3655.5(12) | 6968(4)  | 1522.8(11) | 21.7(4) |
| C5  | 6080.2(11) | 8941(4)  | 4276.4(10) | 17.9(4) |
| C6  | 6162.8(12) | 10872(4) | 4887.4(11) | 19.7(4) |
| C7  | 6202.8(12) | 12455(4) | 5365.2(11) | 22.5(4) |
| C8  | 6950.7(11) | 8662(4)  | 3979.8(10) | 17.4(4) |
| C9  | 7735.5(13) | 7725(3)  | 4675.3(11) | 20.7(4) |
| C10 | 8609.8(12) | 7436(5)  | 4397.7(11) | 25.1(4) |
| C11 | 8868.3(12) | 9812(4)  | 4058.5(12) | 24.8(4) |
| C12 | 8091.6(13) | 10716(4) | 3352.5(11) | 22.8(4) |
| C13 | 7213.5(12) | 11016(4) | 3621.7(11) | 20.7(4) |

(*S*)-*N*-((*S*)-4,4-Dimethylpent-1-yn-3-yl)-2-methylpropane-2-sulfinamide (**7e**)

Single crystals of C<sub>11</sub>H<sub>21</sub>NOS (**7e**) were achieved out of a saturated solution in EtOAc.

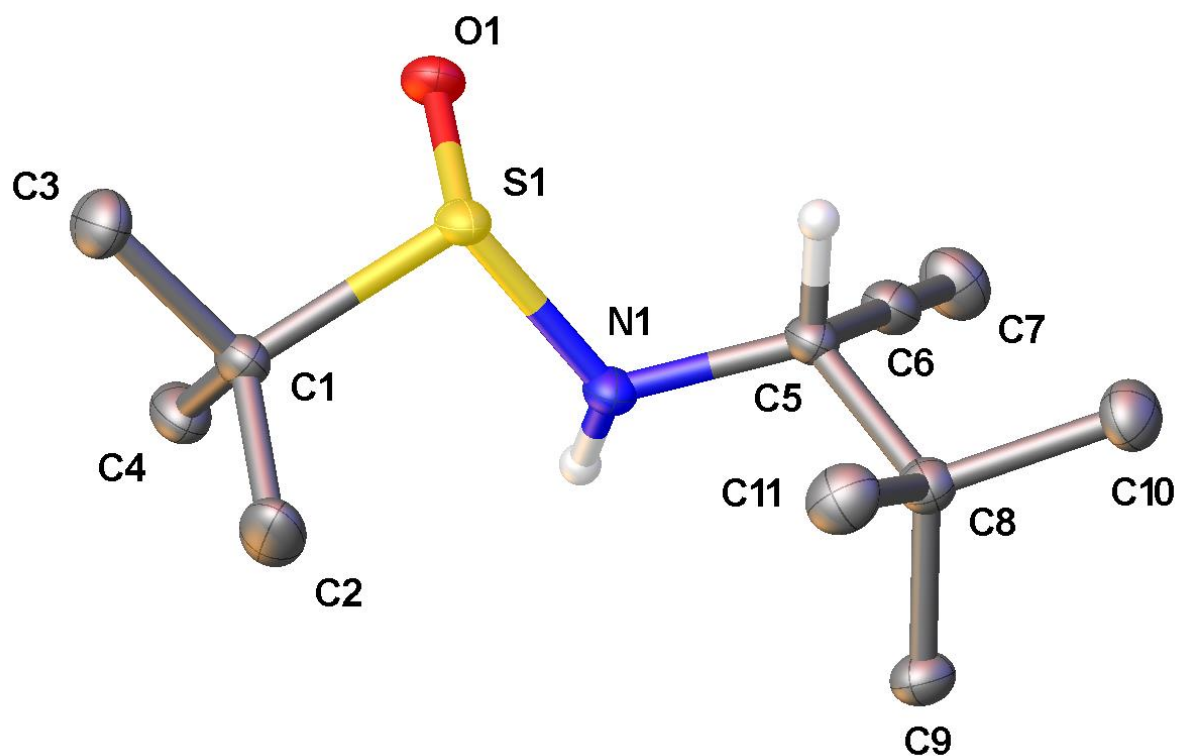

Table S5: Fractional Atomic Coordinates ( $\times 10^4$ ) and Equivalent Isotropic Displacement Parameters ( $\text{\AA}^2 \times 10^3$ ) for **7e**.  $U_{\text{eq}}$  is defined as 1/3 of the trace of the orthogonalised  $U_{ij}$  tensor.

| Atom | <i>x</i>    | <i>y</i>   | <i>z</i>   | <b>U(eq)</b> |
|------|-------------|------------|------------|--------------|
| S1   | 8548.3(5)   | 2785.4(4)  | 7938.1(2)  | 17.89(11)    |
| O1   | 10227.9(17) | 1989.8(12) | 7769.9(6)  | 24.0(3)      |
| N1   | 8117.3(18)  | 4096.2(14) | 7365.9(7)  | 18.5(3)      |
| C1   | 9074(2)     | 3908.6(18) | 8723.7(8)  | 19.9(3)      |
| C2   | 7561(3)     | 4982(2)    | 8850.7(10) | 31.9(4)      |
| C3   | 9181(3)     | 2790(2)    | 9326.6(9)  | 25.9(4)      |
| C4   | 10861(3)    | 4658.1(19) | 8623.7(9)  | 25.1(4)      |
| C5   | 7310(2)     | 3605.5(17) | 6692.9(8)  | 18.3(3)      |
| C6   | 8626(2)     | 3639.6(17) | 6112.6(8)  | 21.5(3)      |
| C7   | 9685(3)     | 3684(2)    | 5646.6(10) | 28.2(4)      |
| C8   | 5586(2)     | 4460.8(17) | 6511.3(8)  | 19.0(3)      |
| C9   | 6011(2)     | 6076.1(18) | 6400.0(9)  | 21.7(3)      |
| C10  | 4790(2)     | 3819(2)    | 5831.1(9)  | 26.2(4)      |
| C11  | 4254(2)     | 4268(2)    | 7116.5(10) | 26.8(4)      |

(*S*)-*N*-[(*R*)-1-Phenylprop-2-yn-1-yl]-2-methylpropanesulfonamide (**7i**)

Single crystals of  $\text{C}_{13}\text{H}_{17}\text{NOS}$  (**7i**) were achieved out of a saturated solution in DCM. Nearly the complete molecule is disordered in ratio 93:7. All atoms of minor occupied part were refined isotropically with idealized geometry of the phenyl rings.

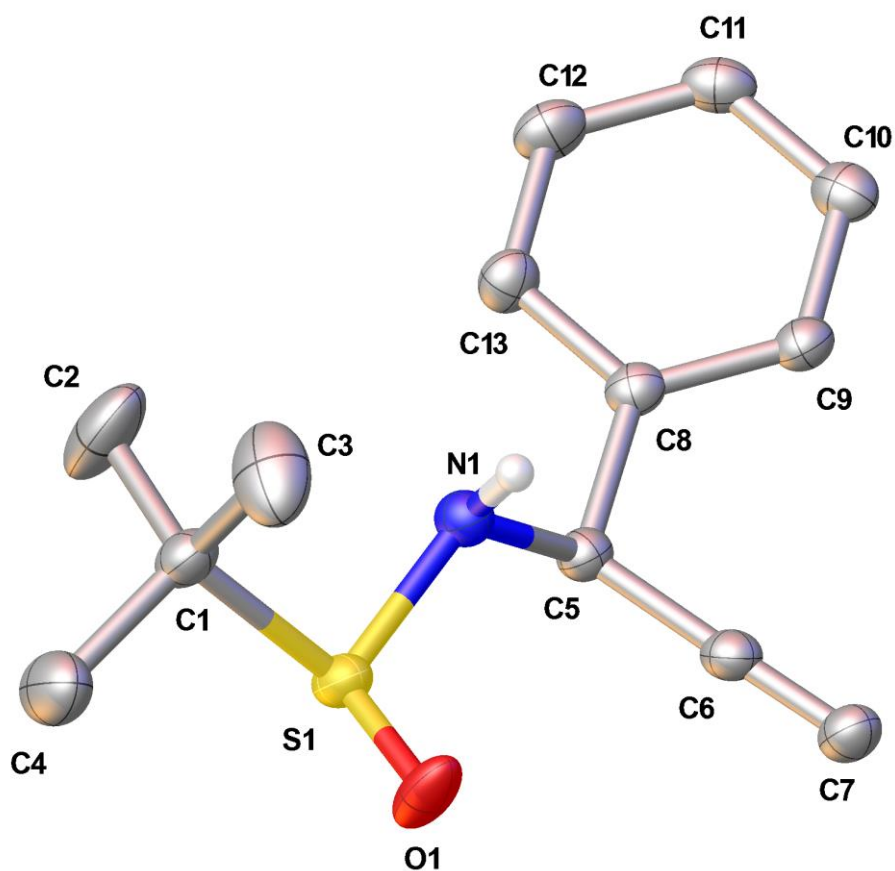

Table S6: Fractional Atomic Coordinates ( $\times 10^4$ ) and Equivalent Isotropic Displacement Parameters ( $\text{\AA}^2 \times 10^3$ ) for **7i**.  $U_{\text{eq}}$  is defined as 1/3 of of the trace of the orthogonalised  $U_{\text{ij}}$  tensor.

| Atom | <i>x</i>   | <i>y</i>   | <i>z</i>   | <i>U</i> (eq) |
|------|------------|------------|------------|---------------|
| S1   | 7828.1(3)  | 10703.0(9) | 7870.6(2)  | 25.96(17)     |
| O1   | 8277.5(8)  | 9077(3)    | 8212.5(8)  | 39.1(4)       |
| N1   | 7217.5(9)  | 9490(3)    | 7406.2(8)  | 24.1(4)       |
| C1   | 8360.5(13) | 11792(4)   | 7265.1(10) | 28.9(5)       |
| C2   | 7910.8(15) | 13337(6)   | 6865.1(15) | 58.7(9)       |



|     |             |           |            |           |
|-----|-------------|-----------|------------|-----------|
| C3  | 8652.2(16)  | 9920(5)   | 6900.8(14) | 55.5(8)   |
| C4  | 8946.5(16)  | 13082(6)  | 7612.1(13) | 47.4(7)   |
| C5  | 6572.6(10)  | 8862(3)   | 7700.9(9)  | 22.0(4)   |
| C6  | 6665.8(11)  | 6879(5)   | 8089.3(12) | 23.9(5)   |
| C7  | 6744.8(11)  | 5262(4)   | 8391.2(10) | 27.1(5)   |
| C8  | 5981.8(10)  | 8636(3)   | 7208.2(9)  | 21.2(4)   |
| C9  | 5566.9(10)  | 6754(3)   | 7153.6(9)  | 23.2(4)   |
| C10 | 5026.6(11)  | 6618(4)   | 6699.4(10) | 26.9(4)   |
| C11 | 4890.1(10)  | 8359(4)   | 6299.9(9)  | 27.1(5)   |
| C12 | 5296.2(11)  | 10252(4)  | 6356.2(10) | 29.4(5)   |
| C13 | 5836.7(10)  | 10389(3)  | 6805.5(10) | 25.7(4)   |
| S2  | 7129.3(2)   | 5427.9(8) | 4568.7(2)  | 24.50(17) |
| O2  | 6689.4(8)   | 3740(3)   | 4242.8(8)  | 39.8(4)   |
| N2  | 7756.2(9)   | 4319(3)   | 5033.0(8)  | 23.6(4)   |
| C14 | 6593.9(11)  | 6506(3)   | 5172.7(9)  | 26.1(4)   |
| C15 | 5967.7(13)  | 7518(5)   | 4824.5(11) | 46.0(6)   |
| C16 | 7021.5(16)  | 8238(6)   | 5529.8(16) | 58.0(8)   |
| C17 | 6362.3(14)  | 4672(5)   | 5582.9(12) | 46.0(7)   |
| C18 | 8411.9(10)  | 3760(4)   | 4741(1)    | 22.1(4)   |
| C19 | 8354.9(10)  | 1687(5)   | 4387.9(10) | 24.2(5)   |
| C20 | 8284.8(10)  | 47(4)     | 4096.9(10) | 27.6(5)   |
| C21 | 9005.5(10)  | 3766(3)   | 5240.2(9)  | 22.7(4)   |
| C22 | 9431.4(11)  | 1955(4)   | 5354.5(9)  | 27.4(5)   |
| C23 | 9978.2(11)  | 2055(4)   | 5803.7(10) | 33.2(5)   |
| C24 | 10104.1(11) | 3967(4)   | 6137.2(10) | 34.4(5)   |
| C25 | 9678.4(12)  | 5772(4)   | 6028.2(12) | 39.3(6)   |
| C26 | 9131.4(12)  | 5677(4)   | 5583.3(11) | 33.5(5)   |
| S1B | 7868(3)     | 4632(12)  | 7964(3)    | 25.96(17) |
| O1B | 8322(12)    | 6280(40)  | 8270(10)   | 38(5)     |

|      |          |           |          |           |
|------|----------|-----------|----------|-----------|
| N1B  | 7236(13) | 5700(40)  | 7495(11) | 28(5)     |
| C1B  | 8388(16) | 3400(60)  | 7352(14) | 32(7)     |
| C2B  | 8050(30) | 1960(80)  | 7080(20) | 54(12)    |
| C3B  | 8611(19) | 5280(60)  | 6937(17) | 43(8)     |
| C4B  | 9095(16) | 2190(50)  | 7657(15) | 16(7)     |
| C5B  | 6598(14) | 6320(50)  | 7843(15) | 16(7)     |
| C6B  | 6646(17) | 8020(70)  | 8146(16) | 29(8)     |
| C7B  | 6742(15) | 9980(50)  | 8444(14) | 31(6)     |
| C8B  | 5979(11) | 6390(40)  | 7266(10) | 39(8)     |
| C9B  | 5570(12) | 8270(30)  | 7192(10) | 27(6)     |
| C10B | 5020(13) | 8310(40)  | 6746(12) | 48(9)     |
| C11B | 4881(14) | 6490(50)  | 6374(13) | 110(20)   |
| C12B | 5290(15) | 4610(40)  | 6448(12) | 76(14)    |
| C13B | 5840(13) | 4560(30)  | 6894(12) | 39(7)     |
| S2B  | 7165(3)  | 9458(11)  | 4677(3)  | 24.50(17) |
| O2B  | 6701(13) | 11100(40) | 4336(12) | 46(6)     |
| N2B  | 7788(13) | 10610(40) | 5154(12) | 30(5)     |
| C14B | 6660(20) | 8250(80)  | 5240(20) | 55(10)    |
| C16B | 7100(30) | 6630(120) | 5570(30) | 94(18)    |
| C17B | 6390(20) | 10120(70) | 5664(19) | 55(10)    |
| C18B | 8438(12) | 11170(40) | 4856(12) | 17(5)     |
| C19B | 8348(14) | 12770(60) | 4447(15) | 14(6)     |
| C20B | 8251(13) | 14810(40) | 4147(12) | 22(5)     |
| C21B | 9057(9)  | 11370(30) | 5342(7)  | 31(7)     |
| C22B | 9464(10) | 13260(30) | 5396(8)  | 20(5)     |
| C23B | 9991(9)  | 13420(30) | 5861(9)  | 23(6)     |
| C24B | 10111(8) | 11680(30) | 6271(7)  | 23(5)     |
| C25B | 9704(9)  | 9800(20)  | 6217(7)  | 24(6)     |
| C26B | 9177(9)  | 9640(30)  | 5753(8)  | 24(6)     |

(*S*)-2-Methyl-*N*-((*R*)-1-(perfluorophenyl)prop-2-yn-1-yl)propane-2-sulfonamide (**7j**)

Single crystals of C<sub>13</sub>H<sub>12</sub>F<sub>5</sub>NOS (**7j**) were achieved out of a saturated solution in Et<sub>2</sub>O. The NSO unit is disorder at two positions with ratio 73:27. The anisotropic displacement parameters of these three atoms were constrained to be same pairwise.

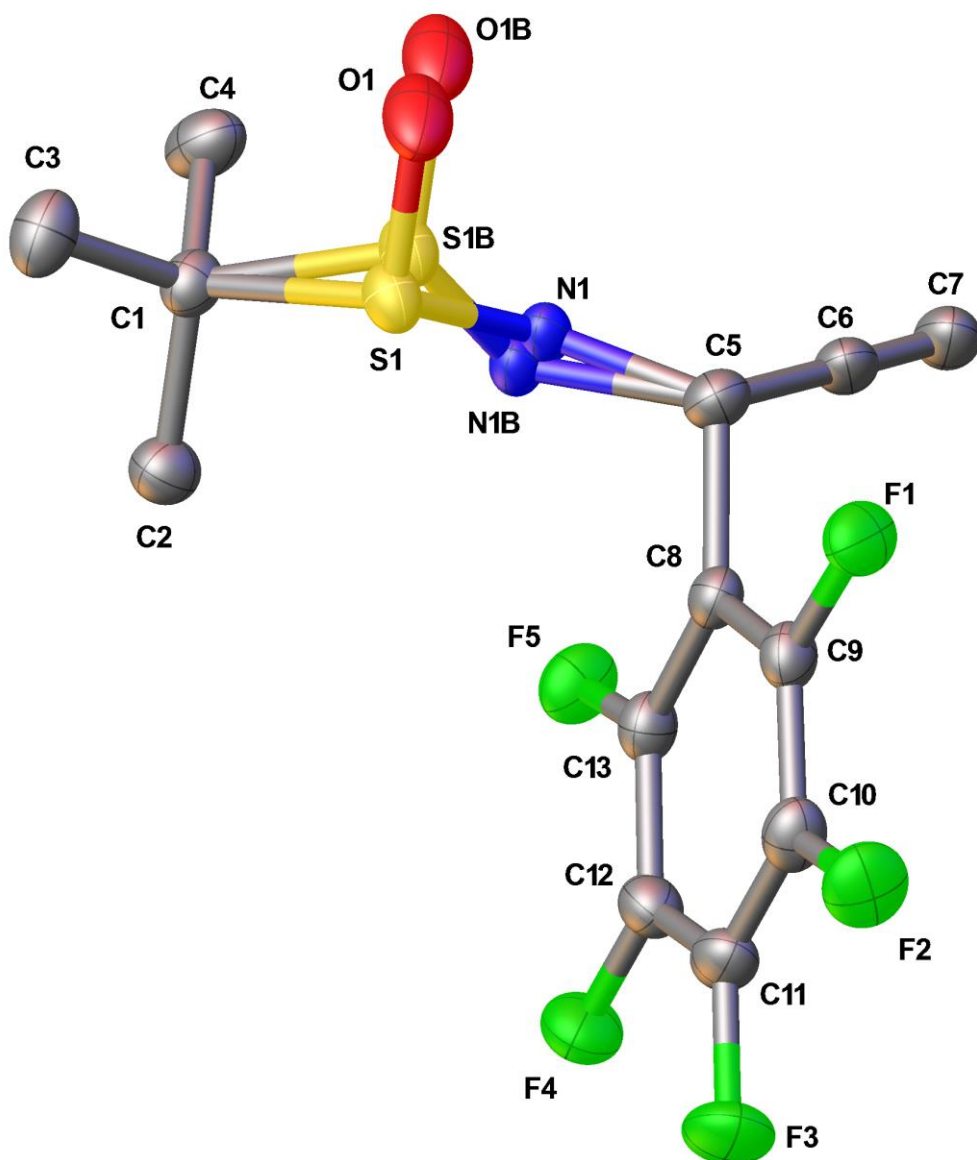

Table S7: Fractional Atomic Coordinates ( $\times 10^4$ ) and Equivalent Isotropic Displacement Parameters ( $\text{\AA}^2 \times 10^3$ ) for **7j**.  $U_{\text{eq}}$  is defined as 1/3 of the trace of the orthogonalised  $U_{ij}$  tensor.

| Atom | <i>x</i>   | <i>y</i>  | <i>z</i>   | $U(\text{eq})$ |
|------|------------|-----------|------------|----------------|
| S1   | 5074.3(11) | -2084(2)  | 7010.6(9)  | 25.9(3)        |
| S1B  | 5256(3)    | -1807(9)  | 6885(3)    | 25.9(3)        |
| F1   | 2475.2(9)  | -3333(3)  | 5104.1(9)  | 34.4(4)        |
| F2   | 982.5(10)  | -3091(4)  | 5448.4(10) | 40.8(4)        |
| F3   | 738.7(10)  | 630(4)    | 6361.7(11) | 43.5(4)        |
| F4   | 2025.6(11) | 4075(3)   | 6945(1)    | 39.9(4)        |
| F5   | 3513.1(9)  | 3889(3)   | 6595.3(10) | 34.5(4)        |
| O1   | 5588(2)    | -3759(7)  | 6691.6(19) | 49.5(10)       |
| O1B  | 5907(7)    | -2700(20) | 6544(5)    | 49.5(10)       |
| N1   | 4736(6)    | 356(17)   | 6359(4)    | 24.6(11)       |
| N1B  | 4708(18)   | 580(60)   | 6524(14)   | 24.6(11)       |
| C1   | 5918.5(15) | -521(5)   | 7928.5(15) | 26.0(5)        |
| C2   | 5368.4(16) | 1094(5)   | 8258.8(16) | 31.9(6)        |
| C3   | 6345.5(18) | -2568(5)  | 8542.2(16) | 35.3(6)        |
| C4   | 6634.6(17) | 841(6)    | 7723.3(18) | 37.6(6)        |
| C5   | 3899.2(14) | 81(5)     | 5633.4(15) | 28.4(5)        |
| C6   | 3863.1(15) | 1923(6)   | 5011.6(15) | 31.2(6)        |
| C7   | 3850.0(15) | 3426(6)   | 4523.2(16) | 35.4(7)        |
| C8   | 3057.0(14) | 229(5)    | 5849.3(14) | 23.8(5)        |
| C9   | 2390.4(15) | -1476(5)  | 5567.0(13) | 25.9(5)        |
| C10  | 1607.7(16) | -1376(5)  | 5730.9(15) | 29.3(5)        |
| C11  | 1489.0(16) | 500(6)    | 6194.7(15) | 30.0(5)        |
| C12  | 2141.5(16) | 2255(5)   | 6488.0(14) | 28.8(6)        |
| C13  | 2914.0(15) | 2115(5)   | 6310.9(14) | 26.4(5)        |

(*S*)-2-Methyl-*N*-((*R*)-1,1,1-trifluorobut-3-yn-2-yl)propane-2-sulfonamide (**7k**)

Single crystals of C<sub>13</sub>H<sub>12</sub>F<sub>5</sub>NOS (**7k**) were achieved out of a saturated solution in EtOAc. One C(CCH)(CF<sub>3</sub>) unit is disordered in ratio 51:49. The anisotropic displacement parameters of these atoms were constrained to be same pairwise. The N-H distances were restrained to a value of 0.86 Å.

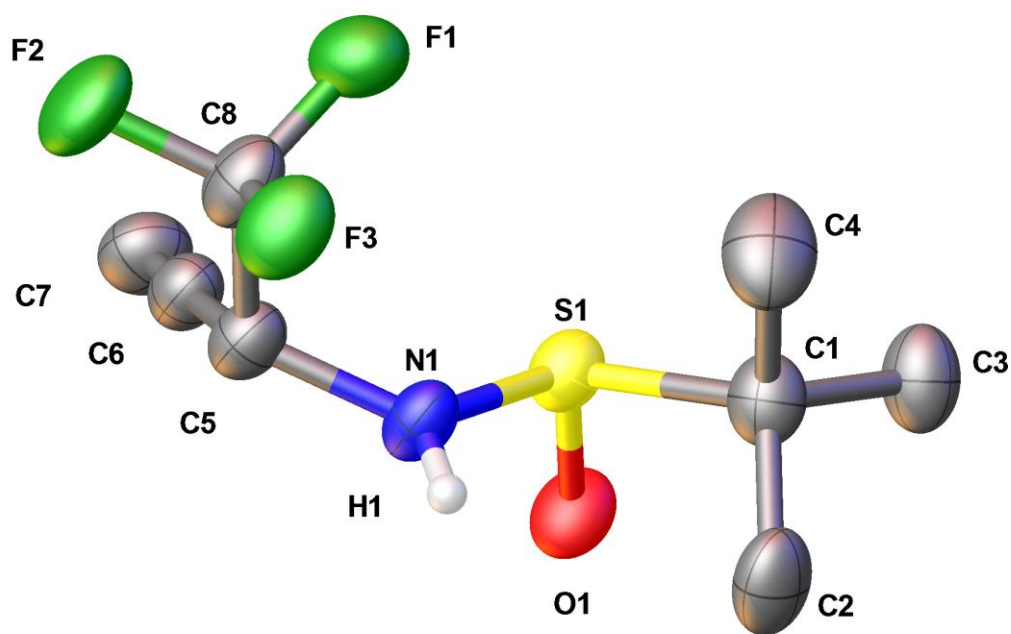

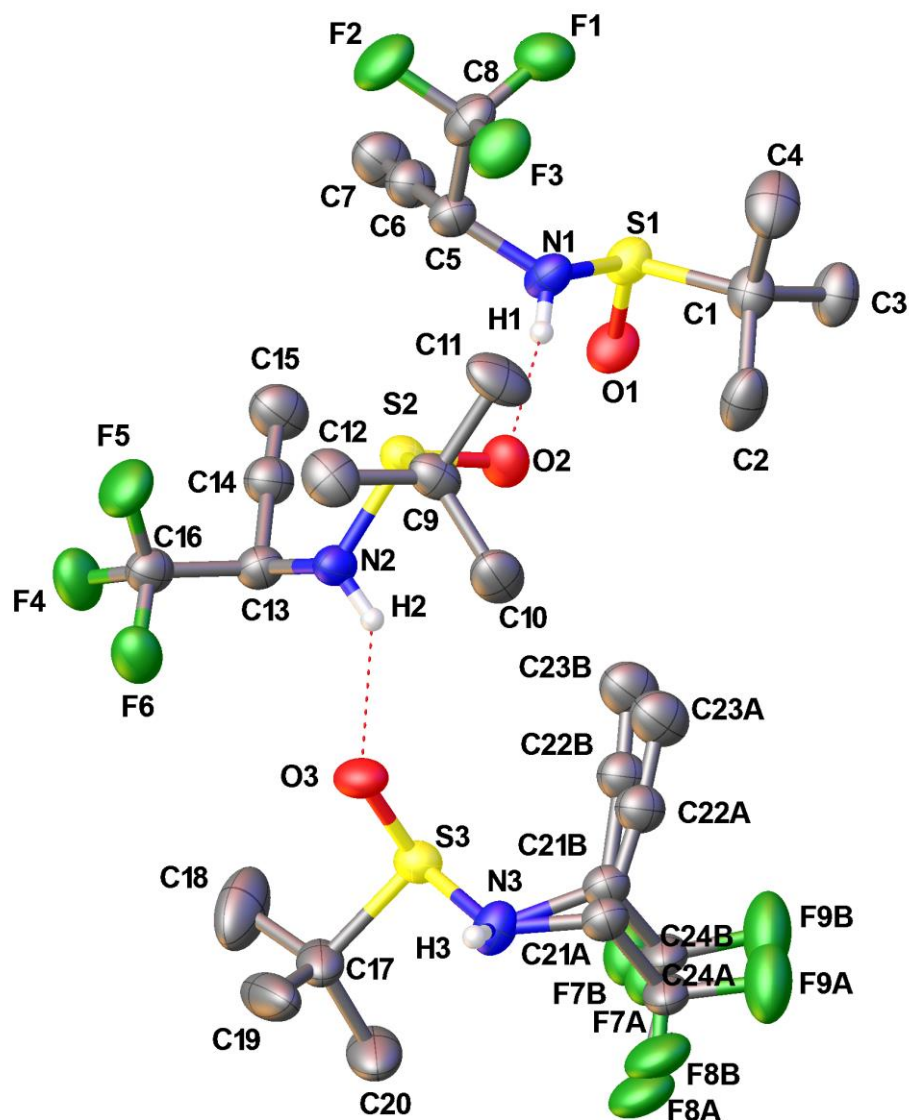

Table S8: Fractional Atomic Coordinates ( $\times 10^4$ ) and Equivalent Isotropic Displacement Parameters ( $\text{\AA}^2 \times 10^3$ ) for **7k**.  $U_{\text{eq}}$  is defined as 1/3 of of the trace of the orthogonalised  $U_{\text{ij}}$  tensor.

| Atom | <i>x</i>   | <i>y</i>   | <i>z</i>   | <i>U</i> (eq) |
|------|------------|------------|------------|---------------|
| S1   | 7760.9(13) | 9077.2(11) | 3804.3(4)  | 36.5(3)       |
| F1   | 7273(4)    | 9709(3)    | 4812.8(10) | 53.6(8)       |
| F2   | 5421(4)    | 9013(3)    | 5078.7(10) | 58.8(9)       |
| F3   | 7090(4)    | 7752(3)    | 4991.4(11) | 54.4(9)       |
| O1   | 7269(4)    | 8891(3)    | 3365.0(11) | 42.2(8)       |

|     |            |            |            |          |
|-----|------------|------------|------------|----------|
| N1  | 7071(5)    | 8024(4)    | 4120.7(14) | 37.2(9)  |
| C1  | 9492(5)    | 8446(5)    | 3808.4(17) | 41.1(11) |
| C2  | 9504(6)    | 7069(6)    | 3679(2)    | 54.1(15) |
| C3  | 10270(6)   | 9245(6)    | 3484.2(18) | 50.5(14) |
| C4  | 10059(7)   | 8666(7)    | 4247.5(19) | 63.0(17) |
| C5  | 5926(5)    | 8383(5)    | 4379.5(17) | 37.4(7)  |
| C6  | 5095(5)    | 9405(5)    | 4208.4(18) | 42.4(8)  |
| C7  | 4477(6)    | 10243(6)   | 4055(2)    | 56.3(10) |
| C8  | 6423(6)    | 8719(5)    | 4819.1(18) | 45.0(13) |
| S2  | 5700.7(12) | 4808.3(11) | 4256.3(4)  | 34.4(3)  |
| F4  | 1123(3)    | 4290(3)    | 3811.1(13) | 57.1(9)  |
| F5  | 2207(4)    | 4129(4)    | 4395.7(11) | 60.8(9)  |
| F6  | 2253(3)    | 2619(3)    | 3952.6(12) | 53.5(8)  |
| O2  | 6794(4)    | 5379(3)    | 3994.1(12) | 44.1(9)  |
| N2  | 4720(4)    | 3890(4)    | 3964.4(14) | 34.3(9)  |
| C9  | 6528(5)    | 3589(5)    | 4573.9(18) | 41.0(12) |
| C10 | 7297(6)    | 2664(5)    | 4298(2)    | 51.3(14) |
| C11 | 7476(7)    | 4334(6)    | 4861(2)    | 58.5(17) |
| C12 | 5423(6)    | 2932(6)    | 4835.4(19) | 52.9(14) |
| C13 | 3502(5)    | 4435(4)    | 3775.6(18) | 37.4(7)  |
| C14 | 3433(5)    | 5810(5)    | 3788.7(18) | 42.4(8)  |
| C15 | 3405(6)    | 6922(6)    | 3791(2)    | 56.3(10) |
| C16 | 2266(5)    | 3882(5)    | 3989.2(17) | 40.0(11) |
| S3  | 5297.5(13) | 2044.2(11) | 2848.1(4)  | 36.4(3)  |
| F7A | 7850(40)   | 2060(40)   | 2116(16)   | 55(4)    |
| F7B | 7580(40)   | 2290(40)   | 2157(15)   | 55(4)    |
| F8A | 8070(30)   | 20(20)     | 2140(8)    | 67(4)    |
| F8B | 8280(30)   | 390(20)    | 2220(8)    | 67(4)    |
| F9A | 9710(20)   | 1249(17)   | 2323(7)    | 85(4)    |

|      |          |          |            |          |
|------|----------|----------|------------|----------|
| F9B  | 9630(20) | 1920(16) | 2369(7)    | 85(4)    |
| O3   | 4824(4)  | 2244(3)  | 3290.3(11) | 42.2(8)  |
| N3   | 6475(4)  | 939(4)   | 2835.2(15) | 42.4(10) |
| C17  | 3941(6)  | 1168(7)  | 2594.1(19) | 52.6(15) |
| C18  | 2760(7)  | 2120(10) | 2593(3)    | 95(3)    |
| C19  | 3633(8)  | -26(7)   | 2841(3)    | 83(3)    |
| C20  | 4381(7)  | 883(8)   | 2145(2)    | 72(2)    |
| C21A | 7890(12) | 1105(11) | 2793(4)    | 37.4(7)  |
| C21B | 7881(12) | 1507(11) | 2841(4)    | 37.4(7)  |
| C22A | 8324(13) | 2333(13) | 2994(4)    | 42.4(8)  |
| C22B | 8082(13) | 2687(13) | 3066(4)    | 42.4(8)  |
| C23A | 8577(16) | 3279(14) | 3180(5)    | 56.3(10) |
| C23B | 8163(15) | 3629(14) | 3236(5)    | 56.3(10) |
| C24A | 8400(30) | 1070(30) | 2343(10)   | 48(4)    |
| C24B | 8350(30) | 1510(20) | 2418(9)    | 48(4)    |

(*S*)-2-Methyl-*N*-((*R*)-1,1,1-trichlorobut-3-yn-2-yl)propane-2-sulfinamide (**7I**)

Single crystals of C<sub>8</sub>H<sub>12</sub>Cl<sub>3</sub>NOS (**7I**) were achieved out of a saturated solution in DCM/Et<sub>2</sub>O, 1:2.



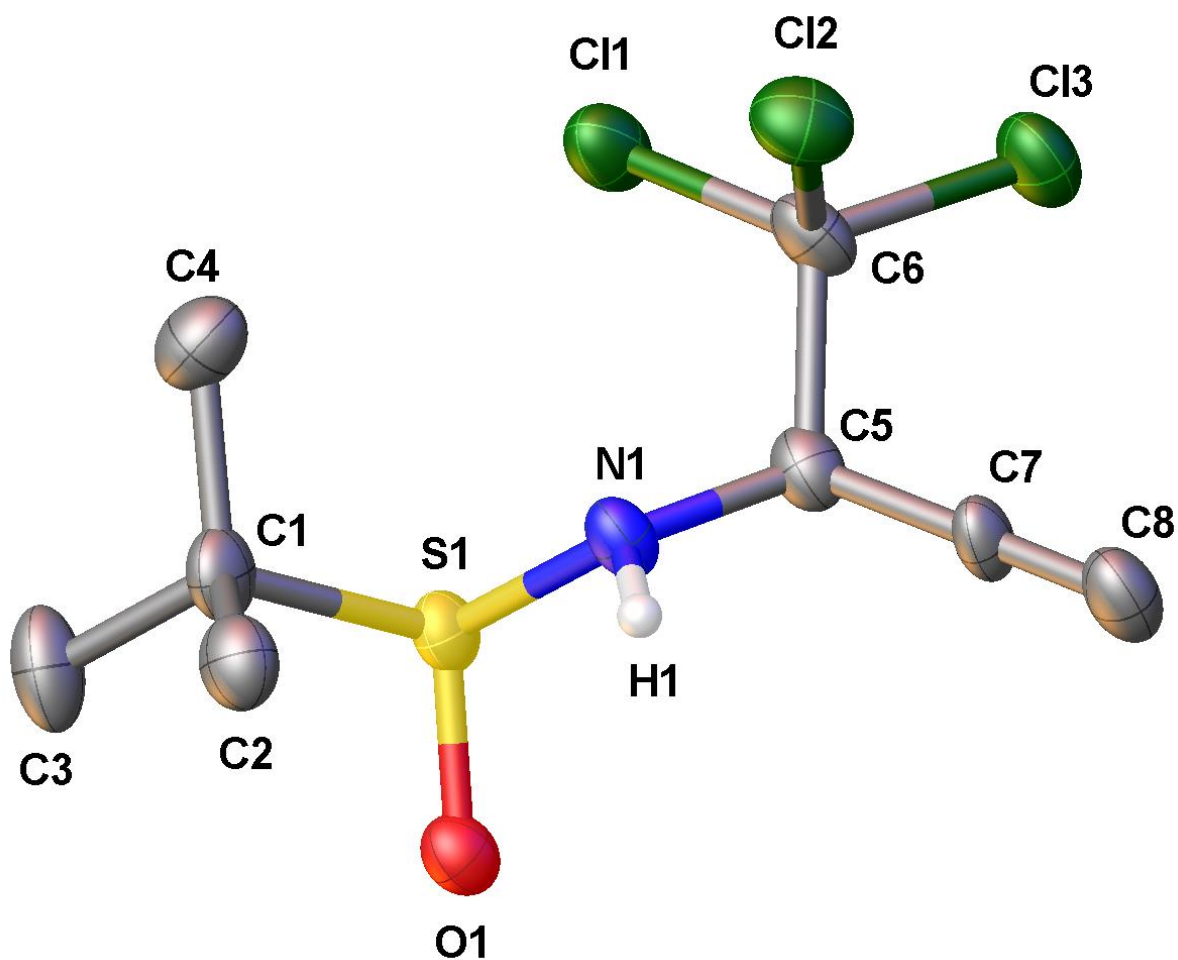

Table S9: Fractional Atomic Coordinates ( $\times 10^4$ ) and Equivalent Isotropic Displacement Parameters ( $\text{\AA}^2 \times 10^3$ ) for propargylamine **7l**.  $U_{\text{eq}}$  is defined as 1/3 of of the trace of the orthogonalised  $U_{\text{II}}$  tensor.

| Atom | <i>x</i>  | <i>y</i>   | <i>z</i>  | <i>U</i> (eq) |
|------|-----------|------------|-----------|---------------|
| Cl1  | 3854(3)   | 3874.3(16) | 6848.8(8) | 39.4(5)       |
| Cl2  | 7752(3)   | 5568.0(18) | 6928.0(8) | 41.6(5)       |
| Cl3  | 3641(3)   | 6492.0(16) | 6324.8(8) | 40.1(5)       |
| S1   | 6445(3)   | 1954.7(14) | 5685.1(7) | 26.7(4)       |
| O1   | 6925(7)   | 1547(4)    | 5011(2)   | 29.8(10)      |
| N1   | 7652(9)   | 3412(5)    | 5844(3)   | 27.6(11)      |
| C1   | 8229(12)  | 902(6)     | 6208(3)   | 33.9(14)      |
| C2   | 10723(12) | 1067(7)    | 6052(3)   | 35.9(15)      |
| C3   | 7415(13)  | -495(7)    | 6062(4)   | 45.9(19)      |
| C4   | 7715(13)  | 1292(8)    | 6909(3)   | 41.4(17)      |

|    |          |         |         |          |
|----|----------|---------|---------|----------|
| C5 | 6220(12) | 4581(6) | 5772(3) | 30.0(13) |
| C6 | 5445(12) | 5109(7) | 6443(3) | 34.0(15) |
| C7 | 7421(11) | 5629(6) | 5430(3) | 28.4(13) |
| C8 | 8451(13) | 6461(7) | 5161(4) | 38.8(15) |

(*S*)-*N*-((*S*)-6-Cyanohex-1-yn-3-yl)-2-methylpropane-2-sulfinamide (**7q**)

Single crystals of C<sub>11</sub>H<sub>18</sub>N<sub>2</sub>OS (**7q**) were achieved out of a saturated solution in EtOAc.

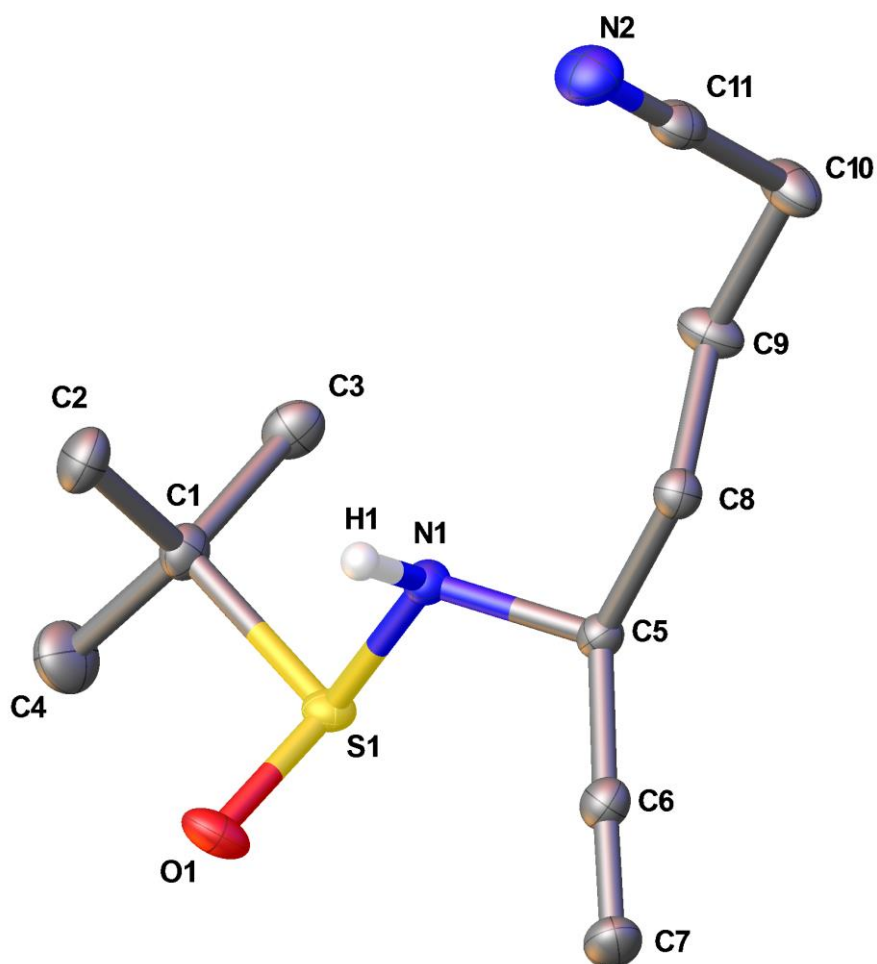

Table S10: Fractional Atomic Coordinates ( $\times 10^4$ ) and Equivalent Isotropic Displacement Parameters ( $\text{\AA}^2 \times 10^3$ ) for **7q**.  $U_{\text{eq}}$  is defined as 1/3 of the trace of the orthogonalised  $U_{\text{IJ}}$  tensor.

| Atom | <i>x</i>   | <i>y</i>   | <i>z</i>  | $U(\text{eq})$ |
|------|------------|------------|-----------|----------------|
| S1   | 2694.2(4)  | 6821.9(4)  | 3380.1(2) | 15.64(10)      |
| O1   | 815.5(13)  | 6379.1(12) | 3473.2(6) | 24.4(2)        |
| N1   | 4006.7(16) | 5374.0(13) | 3643.7(6) | 14.2(2)        |
| N2   | 8058.6(19) | 1710.6(16) | 5076.5(6) | 27.4(3)        |
| C1   | 3170(2)    | 8274.2(16) | 4040.2(7) | 18.8(3)        |
| C2   | 2906(2)    | 7528.6(19) | 4724.4(7) | 24.4(3)        |
| C3   | 5041(2)    | 8856.7(18) | 3936.1(7) | 22.3(3)        |
| C4   | 1839(3)    | 9596.2(19) | 3921.3(9) | 31.5(4)        |
| C5   | 4616.7(18) | 4270.9(16) | 3121.2(6) | 15.0(3)        |
| C6   | 3182.5(19) | 3405.8(16) | 2786.4(7) | 18.4(3)        |
| C7   | 2039(2)    | 2751.5(18) | 2488.9(7) | 23.3(3)        |
| C8   | 5970.1(17) | 3153.9(15) | 3436.4(6) | 15.7(3)        |
| C9   | 7639(2)    | 4017.0(17) | 3633.3(7) | 21.2(3)        |
| C10  | 9037(2)    | 2945.1(19) | 3941.0(8) | 24.1(3)        |
| C11  | 8491(2)    | 2250.1(16) | 4578.7(7) | 20.6(3)        |

*tert*-Butyl-(*S*)-4-(((*S*)-*tert*-butylsulfinyl)amino)hex-5-inoate (**7s**)

Single crystals of  $\text{C}_{14}\text{H}_{25}\text{NO}_3\text{S}$  (**7s**) were achieved out of a saturated solution in EtOAc.

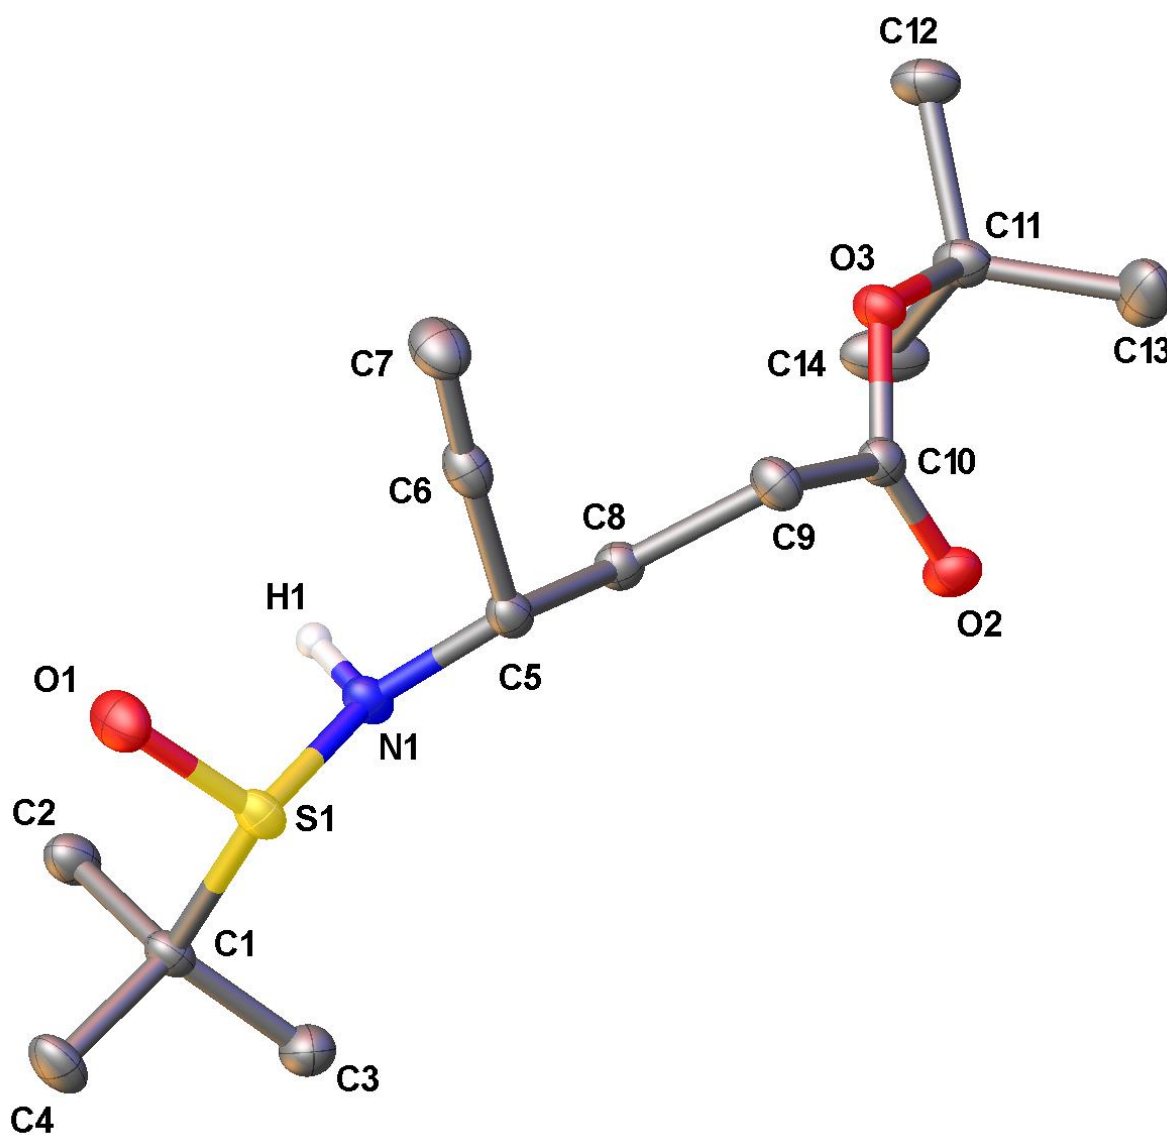

Table S11: Fractional Atomic Coordinates ( $\times 10^4$ ) and Equivalent Isotropic Displacement Parameters ( $\text{\AA}^2 \times 10^3$ ) for **7s**.  $U_{\text{eq}}$  is defined as 1/3 of of the trace of the orthogonalised  $U_{\text{ij}}$  tensor.

| Atom | <i>x</i>  | <i>y</i>   | <i>z</i>  | U(eq)     |
|------|-----------|------------|-----------|-----------|
| S1   | 7903.9(6) | 5097.1(3)  | 7148.7(2) | 18.42(11) |
| O1   | 10079(2)  | 4508.1(11) | 7057.4(5) | 27.3(3)   |
| O2   | -1022(2)  | 5817.7(11) | 5440.9(5) | 22.3(3)   |
| O3   | 686.4(18) | 4938.6(10) | 4704.4(4) | 18.9(2)   |
| N1   | 6662(2)   | 5389.8(12) | 6531.2(6) | 18.2(3)   |
| C1   | 8608(3)   | 6584.0(14) | 7356.4(7) | 18.3(3)   |

|     |          |            |           |         |
|-----|----------|------------|-----------|---------|
| C2  | 10077(3) | 7148.8(15) | 6907.8(7) | 22.9(3) |
| C3  | 6439(3)  | 7237.1(16) | 7446.3(7) | 25.2(4) |
| C4  | 9888(3)  | 6454.6(16) | 7915.6(7) | 26.0(4) |
| C5  | 5047(3)  | 4538.3(13) | 6316.0(6) | 17.5(3) |
| C6  | 6090(3)  | 3500.7(15) | 6067.4(7) | 20.9(3) |
| C7  | 6853(3)  | 2681.4(15) | 5842.6(8) | 28.3(4) |
| C8  | 3596(3)  | 5144.3(14) | 5870.8(6) | 17.8(3) |
| C9  | 1748(3)  | 4385.8(14) | 5631.9(7) | 20.3(3) |
| C10 | 281(3)   | 5117.6(14) | 5258.8(6) | 17.9(3) |
| C11 | -421(3)  | 5653.3(15) | 4265.1(7) | 20.8(3) |
| C12 | 549(3)   | 5181.1(16) | 3714.1(7) | 26.7(4) |
| C13 | -2930(3) | 5478(2)    | 4284.3(8) | 33.9(4) |
| C14 | 258(4)   | 6898.2(15) | 4343.7(8) | 33.0(4) |

(*S*)-2-Methyl-*N*-((*R*)-1,1,1-trifluoropropan-2-yl)propane-2-sulfinamide (**10k**)

Single crystals of C<sub>7</sub>H<sub>14</sub>F<sub>3</sub>NOS (**10k**) were achieved out of a saturated solution in EtOAc.

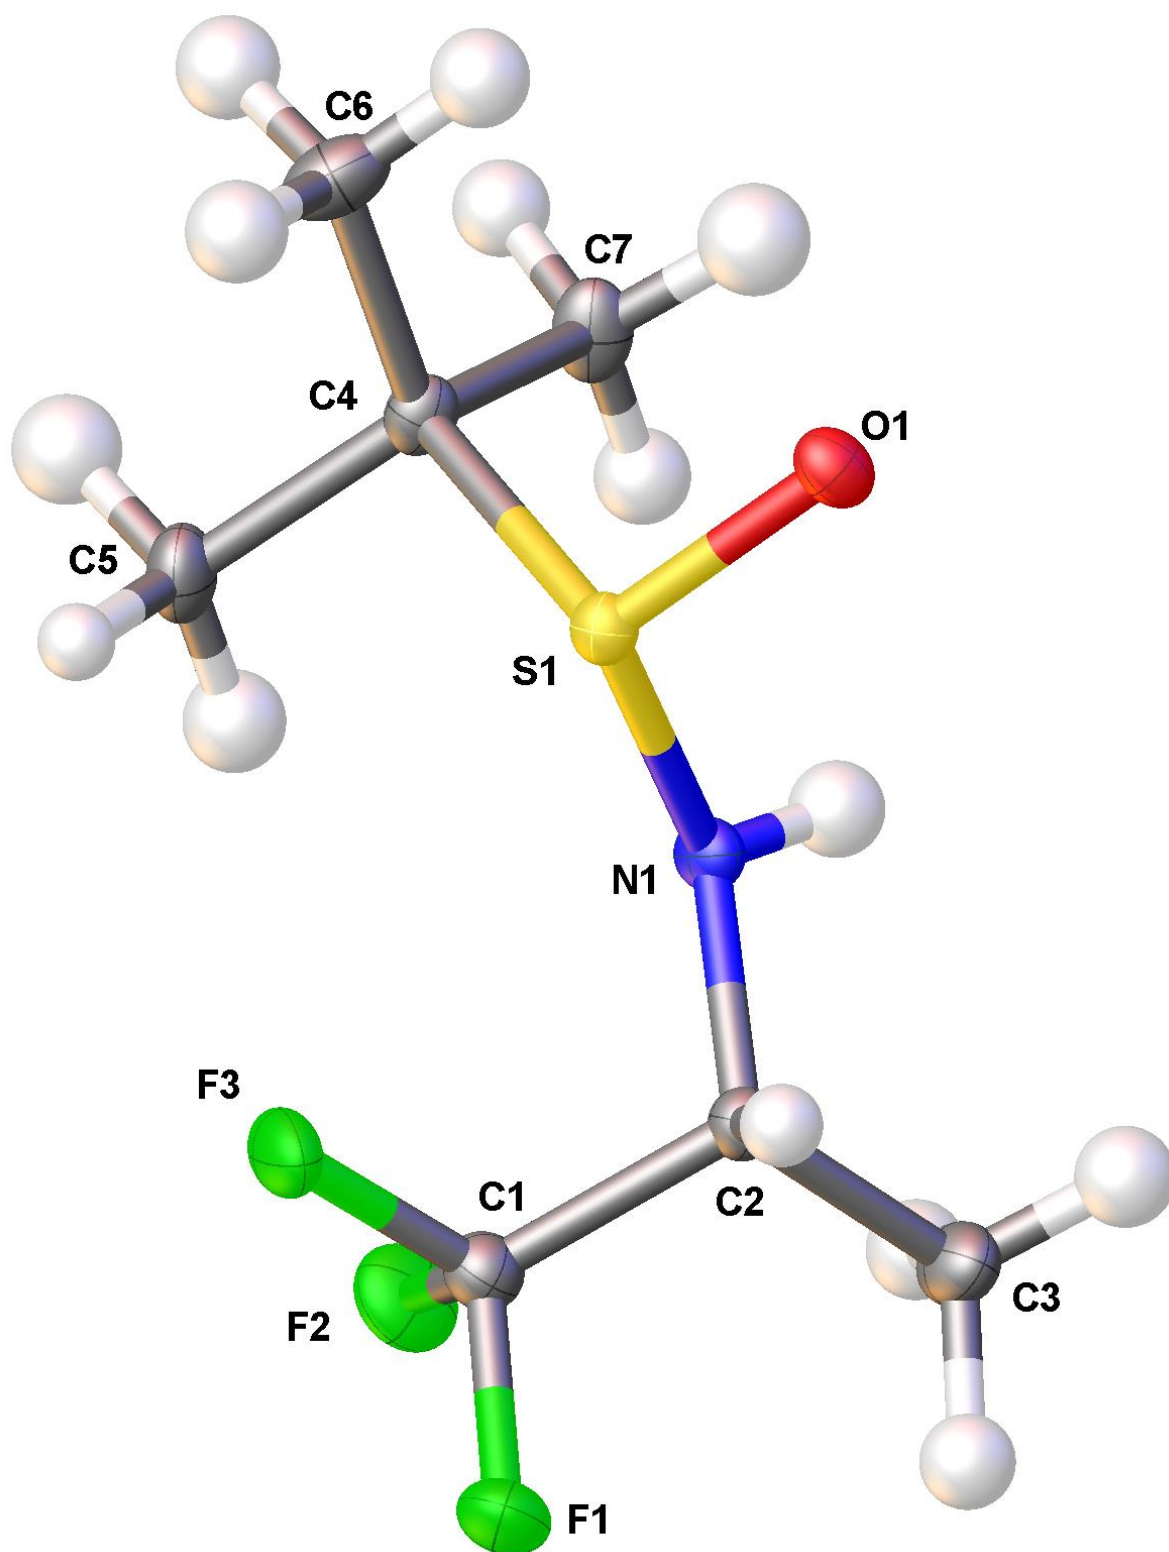

Table S12: Fractional Atomic Coordinates ( $\times 10^4$ ) and Equivalent Isotropic Displacement Parameters ( $\text{\AA}^2 \times 10^3$ ) for **10k**.  $U_{\text{eq}}$  is defined as 1/3 of the trace of the orthogonalised  $U_{\text{IJ}}$  tensor.

| Atom | <i>x</i>   | <i>y</i>   | <i>z</i>   | <i>U</i> (eq) |
|------|------------|------------|------------|---------------|
| S1   | 8146.3(6)  | 7780.4(4)  | 5813.0(2)  | 12.92(9)      |
| F1   | 10538(2)   | 3219.2(11) | 6109.6(6)  | 25.2(2)       |
| F2   | 7680(2)    | 3890.0(12) | 6758.6(6)  | 28.5(3)       |
| F3   | 10563(2)   | 5288.4(12) | 6609.2(6)  | 26.3(2)       |
| O1   | 7612.7(19) | 8589.2(13) | 5142.0(6)  | 16.8(2)       |
| N1   | 6760(2)    | 6224.1(14) | 5807.8(7)  | 14.9(2)       |
| C1   | 9212(3)    | 4347.0(18) | 6275.4(8)  | 18.3(3)       |
| C2   | 8103(3)    | 4964.2(17) | 5609.8(8)  | 14.8(3)       |
| C3   | 6546(3)    | 3856(2)    | 5265.9(10) | 23.7(4)       |
| C4   | 6511(3)    | 8669.5(18) | 6528.3(8)  | 15.8(3)       |
| C5   | 7096(3)    | 7886(2)    | 7220.4(9)  | 21.7(3)       |
| C6   | 7420(3)    | 10196(2)   | 6541.9(11) | 25.0(4)       |
| C7   | 3944(3)    | 8636(2)    | 6378.9(10) | 21.7(4)       |

Methyl 4-(((*S*)-3-(((*S*)-*tert*-Butylsulfinyl)amino)-3-phenylprop-1-yn-1-yl)benzoate (**11i**)

Single crystals of  $\text{C}_{21}\text{H}_{23}\text{NO}_3\text{S}$  (**11i**) were achieved out of a saturated solution in  $\text{CHCl}_3$ . The crystal was twinned with ratio 60:40 by a rotation of  $180^\circ$  around 100. Both domains were taken into account during data reduction and refinement.

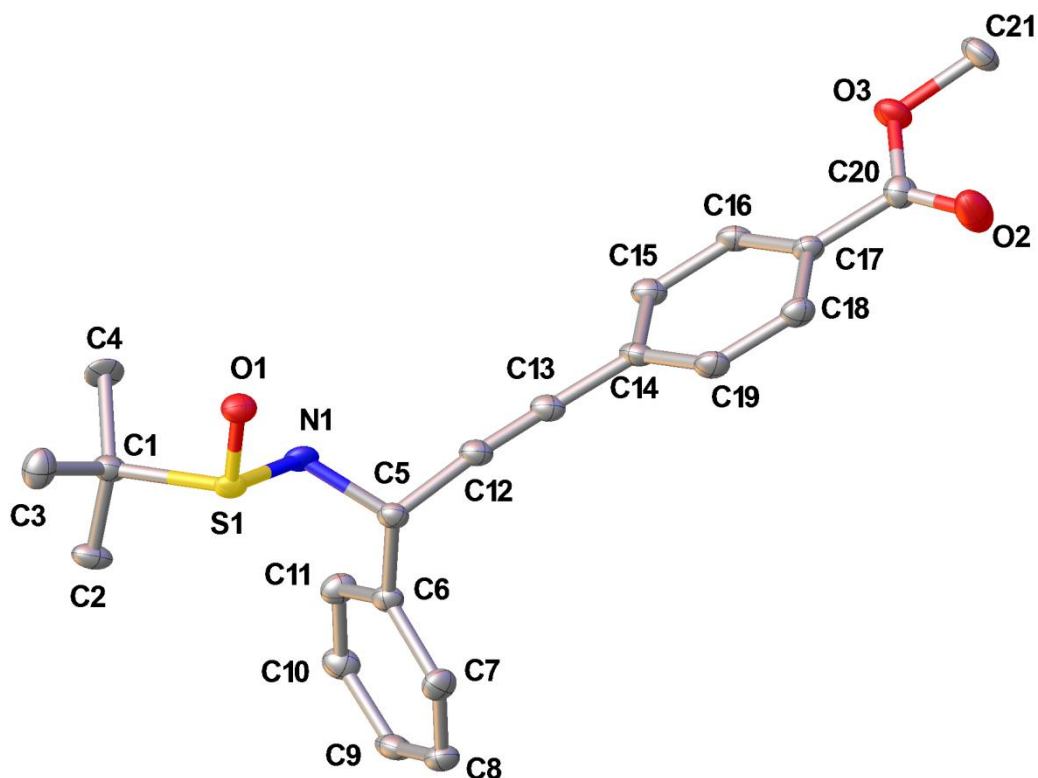

Table S13: Fractional Atomic Coordinates ( $\times 10^4$ ) and Equivalent Isotropic Displacement Parameters ( $\text{\AA}^2 \times 10^3$ ) for **11i**.  $U_{\text{eq}}$  is defined as 1/3 of of the trace of the orthogonalised  $U_{\text{H}}$  tensor.

| Atom | <i>x</i>   | <i>y</i> | <i>z</i>  | $U(\text{eq})$ |
|------|------------|----------|-----------|----------------|
| S1   | 3625.0(14) | 1722(3)  | 5182.7(8) | 17.6(3)        |
| O1   | 5017(4)    | 2166(8)  | 5617(3)   | 21.3(10)       |
| O2   | 8272(6)    | 5050(11) | -390(4)   | 39.8(14)       |
| O3   | 7635(5)    | 8606(9)  | -177(3)   | 25.5(11)       |
| N1   | 3295(6)    | 3101(10) | 4254(3)   | 20.3(11)       |



|     |         |           |         |          |
|-----|---------|-----------|---------|----------|
| C1  | 2594(6) | 3384(12)  | 5789(4) | 21.5(13) |
| C2  | 1180(6) | 2645(13)  | 5458(4) | 24.9(14) |
| C3  | 3065(7) | 2617(14)  | 6717(4) | 28.3(16) |
| C4  | 2786(7) | 5923(12)  | 5694(4) | 25.4(14) |
| C5  | 3283(6) | 1620(13)  | 3498(3) | 18.0(11) |
| C6  | 1901(6) | 1006(11)  | 3050(3) | 18.7(13) |
| C7  | 1676(7) | -1122(13) | 2655(4) | 23.8(14) |
| C8  | 445(7)  | -1634(13) | 2184(4) | 24.6(14) |
| C9  | -573(7) | -43(13)   | 2103(4) | 25.1(14) |
| C10 | -351(6) | 2018(14)  | 2513(4) | 24.7(15) |
| C11 | 885(7)  | 2566(12)  | 2984(4) | 22.4(13) |
| C12 | 3964(6) | 2721(13)  | 2873(4) | 20.1(13) |
| C13 | 4477(6) | 3494(13)  | 2324(4) | 20.2(13) |
| C14 | 5203(6) | 4279(12)  | 1692(4) | 20.5(14) |
| C15 | 5001(6) | 6405(13)  | 1306(4) | 22.0(14) |
| C16 | 5779(6) | 7106(12)  | 736(4)  | 21.1(14) |
| C17 | 6741(6) | 5669(12)  | 536(3)  | 19.0(13) |
| C18 | 6922(7) | 3527(13)  | 897(4)  | 21.6(13) |
| C19 | 6160(6) | 2839(12)  | 1477(4) | 21.4(14) |
| C20 | 7613(6) | 6354(13)  | -59(4)  | 22.9(15) |
| C21 | 8496(7) | 9386(15)  | -739(4) | 29.8(16) |

Methyl 4-((1*E*,3*Z*)-3-(((*S*)-*tert*-Butylsulfinyl)imino)-3-phenylprop-1-en-1-yl)benzoate (**12i**)

Single crystals of C<sub>21</sub>H<sub>23</sub>NO<sub>3</sub>S (**12i**) were achieved out of a saturated solution in CHCl<sub>3</sub>.

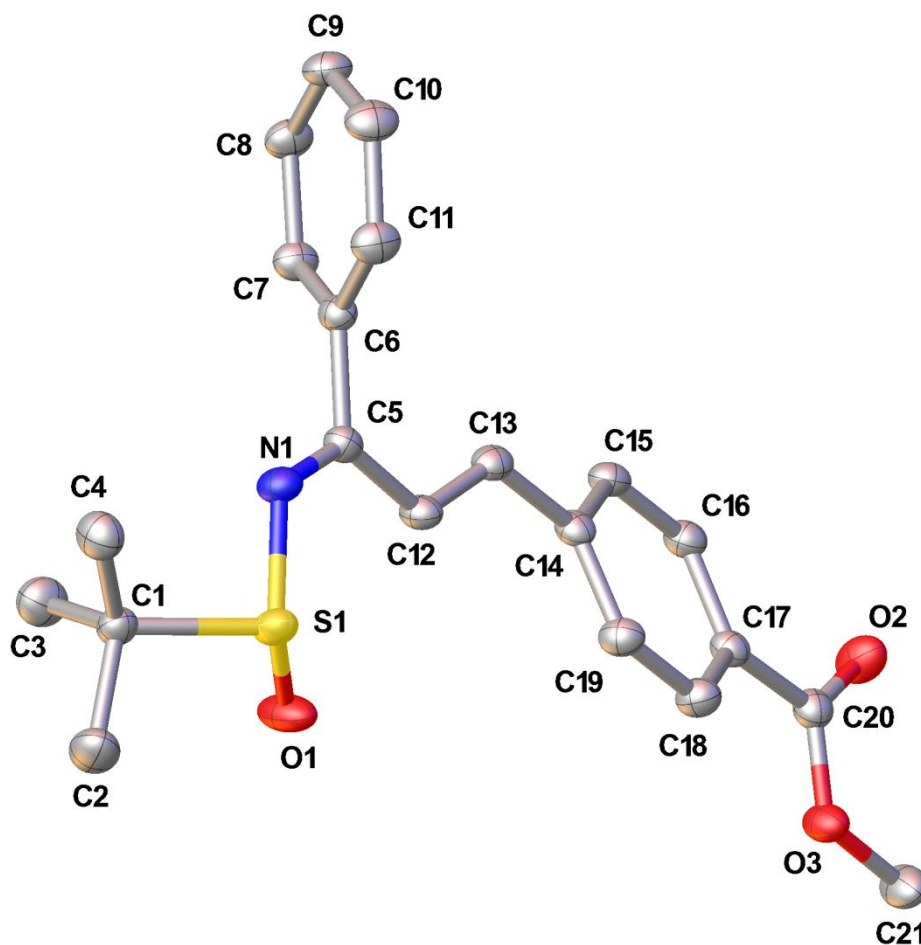

Table S14: Fractional Atomic Coordinates ( $\times 10^4$ ) and Equivalent Isotropic Displacement Parameters ( $\text{\AA}^2 \times 10^3$ ) for **12i**.  $U_{\text{eq}}$  is defined as 1/3 of the trace of the orthogonalised  $U_{\text{ij}}$  tensor.

| Atom | <i>x</i>   | <i>y</i>  | <i>z</i>  | $U(\text{eq})$ |
|------|------------|-----------|-----------|----------------|
| S1   | 5313.5(11) | 5191.5(6) | 3501.6(2) | 26.65(17)      |
| O1   | 3568(4)    | 6178(2)   | 3586.6(8) | 40.6(6)        |
| O2   | -7437(3)   | 5126(2)   | 5629.0(7) | 33.0(5)        |

|     |          |            |            |         |
|-----|----------|------------|------------|---------|
| O3  | -5236(3) | 6883.7(17) | 5585.6(6)  | 28.8(4) |
| N1  | 4352(4)  | 3670(2)    | 3444.7(7)  | 24.7(5) |
| C1  | 6103(4)  | 5394(3)    | 2929.1(8)  | 23.5(5) |
| C2  | 7134(6)  | 6752(3)    | 2910.6(10) | 37.5(7) |
| C3  | 4073(5)  | 5320(3)    | 2643.6(10) | 35.3(7) |
| C4  | 7818(5)  | 4369(3)    | 2822.5(10) | 32.6(6) |
| C5  | 2672(4)  | 3189(3)    | 3652.1(8)  | 21.8(5) |
| C6  | 2266(4)  | 1784(2)    | 3565.6(8)  | 20.8(5) |
| C7  | 296(5)   | 1351(2)    | 3386.1(8)  | 24.2(5) |
| C8  | -3(5)    | 38(3)      | 3299.2(9)  | 26.5(5) |
| C9  | 1650(5)  | -848(3)    | 3403.3(9)  | 28.0(6) |
| C10 | 3592(5)  | -420(3)    | 3591.3(10) | 30.6(6) |
| C11 | 3923(5)  | 892(3)     | 3668.3(9)  | 27.3(6) |
| C12 | 1280(4)  | 3866(2)    | 3967.0(8)  | 22.5(5) |
| C13 | -305(4)  | 3275(2)    | 4199.4(8)  | 22.0(5) |
| C14 | -1651(4) | 3914(2)    | 4530.8(8)  | 21.1(5) |
| C15 | -3746(4) | 3405(2)    | 4629.2(8)  | 22.4(5) |
| C16 | -5087(4) | 3993(2)    | 4932.5(8)  | 22.9(5) |
| C17 | -4345(4) | 5092(2)    | 5150.5(8)  | 21.0(5) |
| C18 | -2247(5) | 5597(3)    | 5062.6(9)  | 25.5(6) |
| C19 | -924(4)  | 5005(3)    | 4755.1(9)  | 24.3(5) |

|     |          |         |            |         |
|-----|----------|---------|------------|---------|
| C20 | -5837(5) | 5680(3) | 5480.5(8)  | 23.9(6) |
| C21 | -6645(6) | 7512(3) | 5898.5(10) | 35.2(7) |

Methyl 3-(((1*E*,3*Z*)-3-(((*S*)-*tert*-Butylsulfinyl)imino)-4,4,4-trifluorobut-1-en-1-yl)benzoate (**12k**)

Single crystals of C<sub>11</sub>H<sub>7</sub>F<sub>3</sub>O<sub>3</sub> (**12k**) were achieved out of a saturated solution in CHCl<sub>3</sub>.

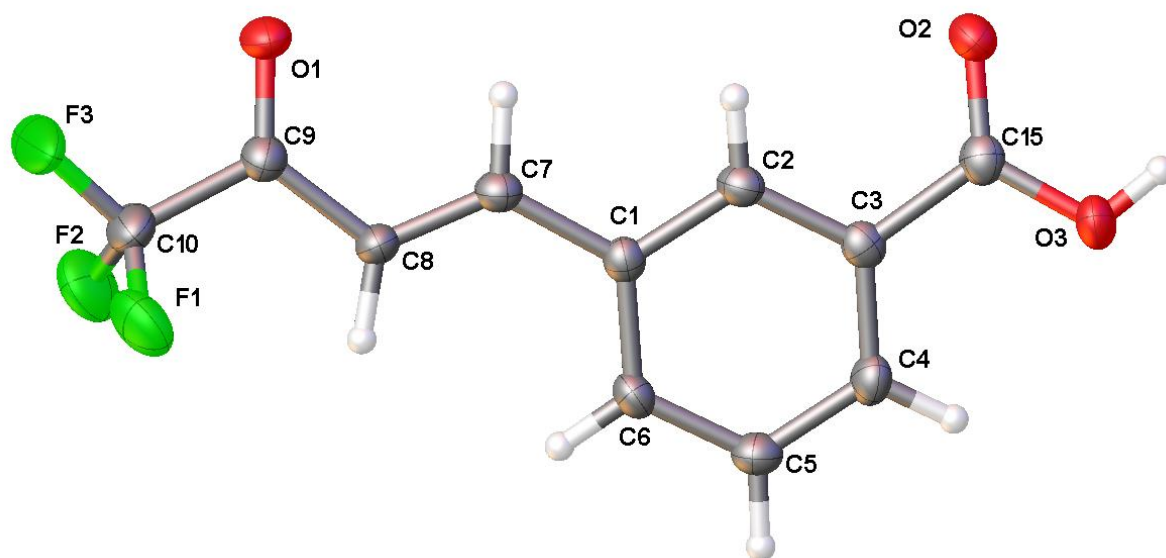

Table S15: Fractional Atomic Coordinates ( $\times 10^4$ ) and Equivalent Isotropic Displacement Parameters ( $\text{\AA}^2 \times 10^3$ ) for **12k**.  $U_{\text{eq}}$  is defined as 1/3 of of the trace of the orthogonalised  $U_{\text{H}}$  tensor.

| Atom | <i>x</i>   | <i>y</i>   | <i>z</i>   | U(eq)   |
|------|------------|------------|------------|---------|
| F1   | 1467.9(9)  | 6458.8(17) | 1152.3(11) | 49.7(5) |
| F2   | 1058(1)    | 6633.7(18) | 2521.6(13) | 56.5(5) |
| F3   | 583.9(10)  | 5069.4(19) | 1493.9(16) | 82.2(8) |
| O1   | 1913(1)    | 3810.2(18) | 2611.1(13) | 37.3(5) |
| O2   | 6460.9(10) | 2704.4(18) | 4669.3(12) | 33.6(5) |
| O3   | 7476.2(10) | 4218(2)    | 4694.8(13) | 34.1(5) |
| C1   | 4484.7(13) | 5390(2)    | 3557.0(15) | 21.7(5) |

|     |            |         |            |         |
|-----|------------|---------|------------|---------|
| C2  | 5145.0(14) | 4473(3) | 3864.5(17) | 24.0(6) |
| C3  | 6004.6(13) | 4855(3) | 4202.6(16) | 22.9(5) |
| C4  | 6213.4(14) | 6167(3) | 4242.9(17) | 26.6(6) |
| C5  | 5567.0(15) | 7082(3) | 3956.6(17) | 26.9(6) |
| C6  | 4707.5(14) | 6706(3) | 3608.7(17) | 24.8(6) |
| C7  | 3593.3(14) | 4922(3) | 3204.7(17) | 24.5(6) |
| C8  | 2877.7(13) | 5612(3) | 2801.6(17) | 24.7(6) |
| C9  | 2046.3(14) | 4945(3) | 2468.1(18) | 27.8(6) |
| C10 | 1276.7(15) | 5782(3) | 1898(2)    | 39.0(7) |
| C15 | 6668.0(14) | 3833(3) | 4538.2(16) | 25.9(6) |

(*S*)-2-Methyl-*N*-((*S*)-3-(Trimethylsilyl)-4,5,6,7-tetrahydro-[1,2,3]triazolo[1,5-*a*]pyridin-4-yl)propane-2-sulfinamide (**13w**)

Single crystals of C<sub>13</sub>H<sub>26</sub>N<sub>4</sub>OSSi (**13w**) were achieved out of a saturated solution in toluene.

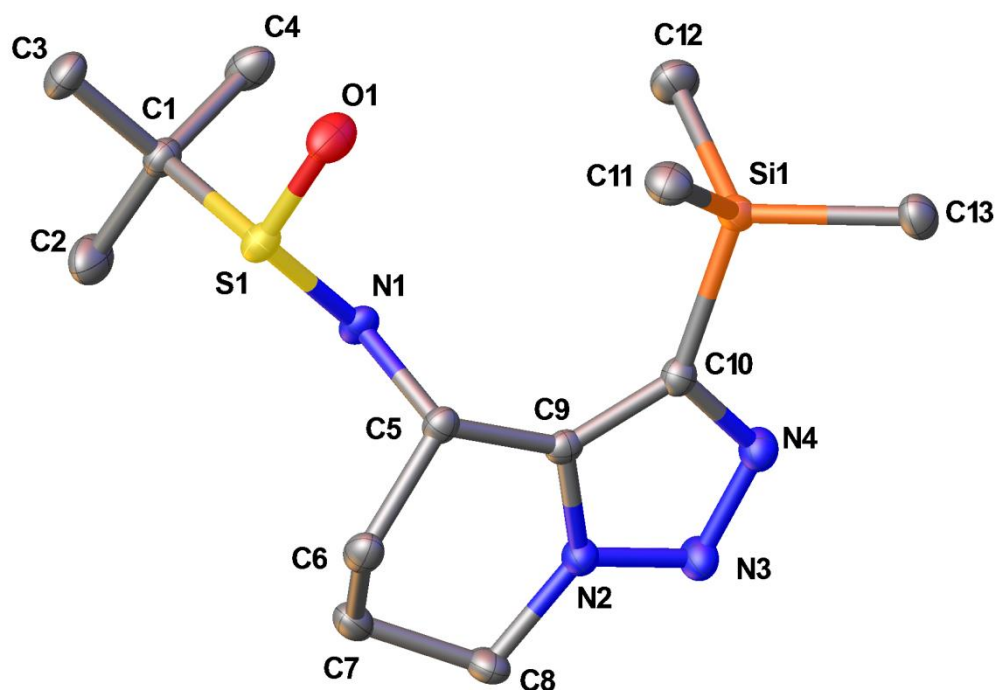

Table S16: Fractional Atomic Coordinates ( $\times 10^4$ ) and Equivalent Isotropic Displacement Parameters ( $\text{\AA}^2 \times 10^3$ ) for **13w**.  $U_{\text{eq}}$  is defined as 1/3 of the trace of the orthogonalised  $U_{\text{ij}}$  tensor.

| Atom | <i>x</i>   | <i>y</i>   | <i>z</i>  | <b>U(eq)</b> |
|------|------------|------------|-----------|--------------|
| S1   | 7886.8(4)  | 4926.8(3)  | 6980.4(2) | 17.48(9)     |
| Si1  | 4242.6(5)  | 4312.6(4)  | 4794.9(3) | 16.7(1)      |
| O1   | 7588.4(15) | 3706.2(11) | 6735.9(8) | 28.0(3)      |
| N1   | 6982.1(15) | 5879.4(12) | 6404.5(8) | 17.0(3)      |
| N2   | 3991.5(16) | 7522.0(11) | 5766.3(8) | 16.6(3)      |

|     |             |            |            |         |
|-----|-------------|------------|------------|---------|
| N3  | 3223.0(18)  | 7664.4(12) | 5080.6(9)  | 20.8(3) |
| N4  | 3235.2(16)  | 6654.8(12) | 4714.0(9)  | 20.0(3) |
| C1  | 9879.4(18)  | 5246.7(14) | 6671.3(10) | 18.4(3) |
| C2  | 10248(2)    | 6508.0(16) | 6874.0(13) | 29.8(4) |
| C3  | 10861(2)    | 4409.7(16) | 7167.8(11) | 25.6(4) |
| C4  | 10072.8(19) | 4976.3(17) | 5795.5(10) | 24.8(4) |
| C5  | 5319.6(17)  | 6029.0(14) | 6583.2(9)  | 15.7(3) |
| C6  | 5113.7(19)  | 6918.2(15) | 7249.5(10) | 20.1(3) |
| C7  | 5401.8(19)  | 8147.2(15) | 6934.7(11) | 21.8(3) |
| C8  | 4167(2)     | 8474.0(14) | 6336.7(10) | 21.9(3) |
| C9  | 4481.3(17)  | 6410.7(13) | 5848.5(9)  | 14.7(3) |
| C10 | 4005.2(17)  | 5844.8(13) | 5167.9(10) | 16.0(3) |
| C11 | 4213(2)     | 3269.7(14) | 5643.2(11) | 24.1(3) |
| C12 | 6144(2)     | 4190.3(17) | 4278.8(11) | 27.5(4) |
| C13 | 2626.6(19)  | 4024.2(15) | 4095.1(10) | 22.7(3) |

# Spectra

## Ethyl (3-hydroxypropynyl)-benzoate derivatives **1**

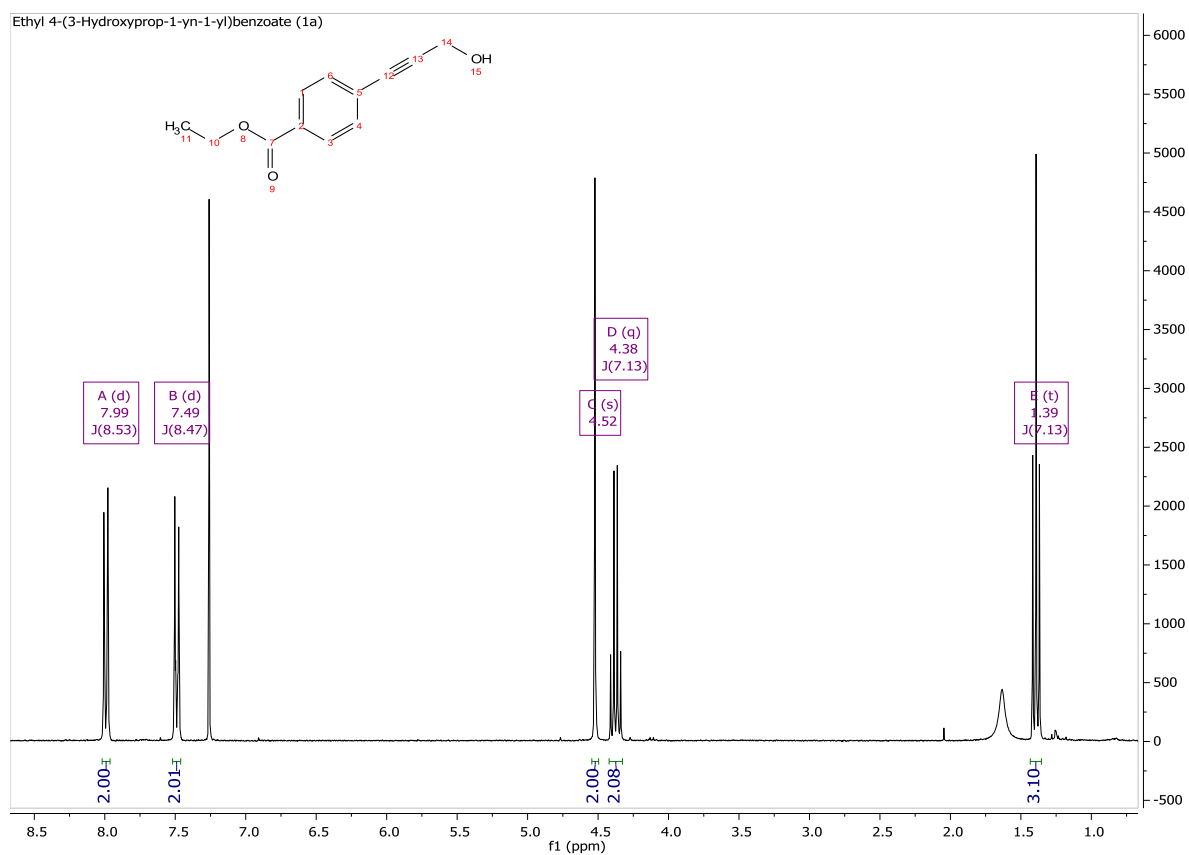





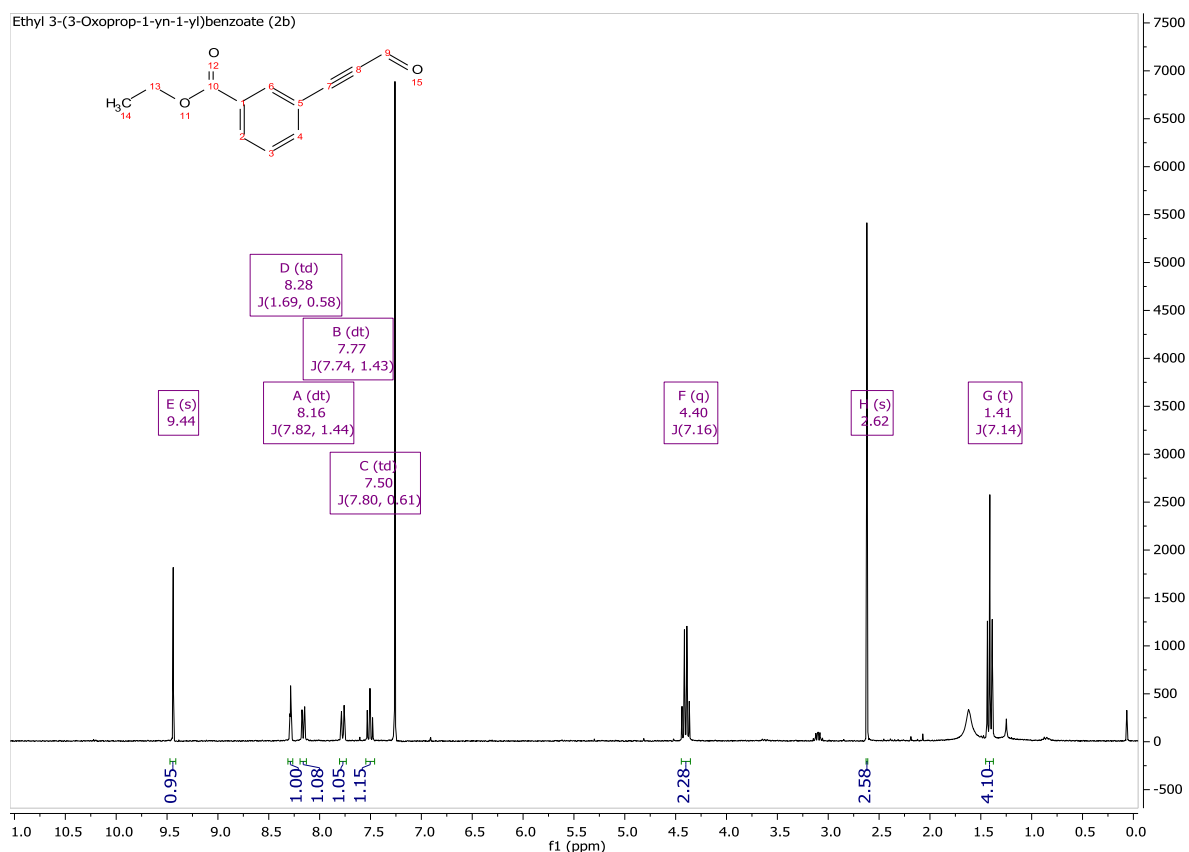

### Ethyl (*tert*-Butylsulfinyl)imino)propynyl)benzoate derivatives **3**

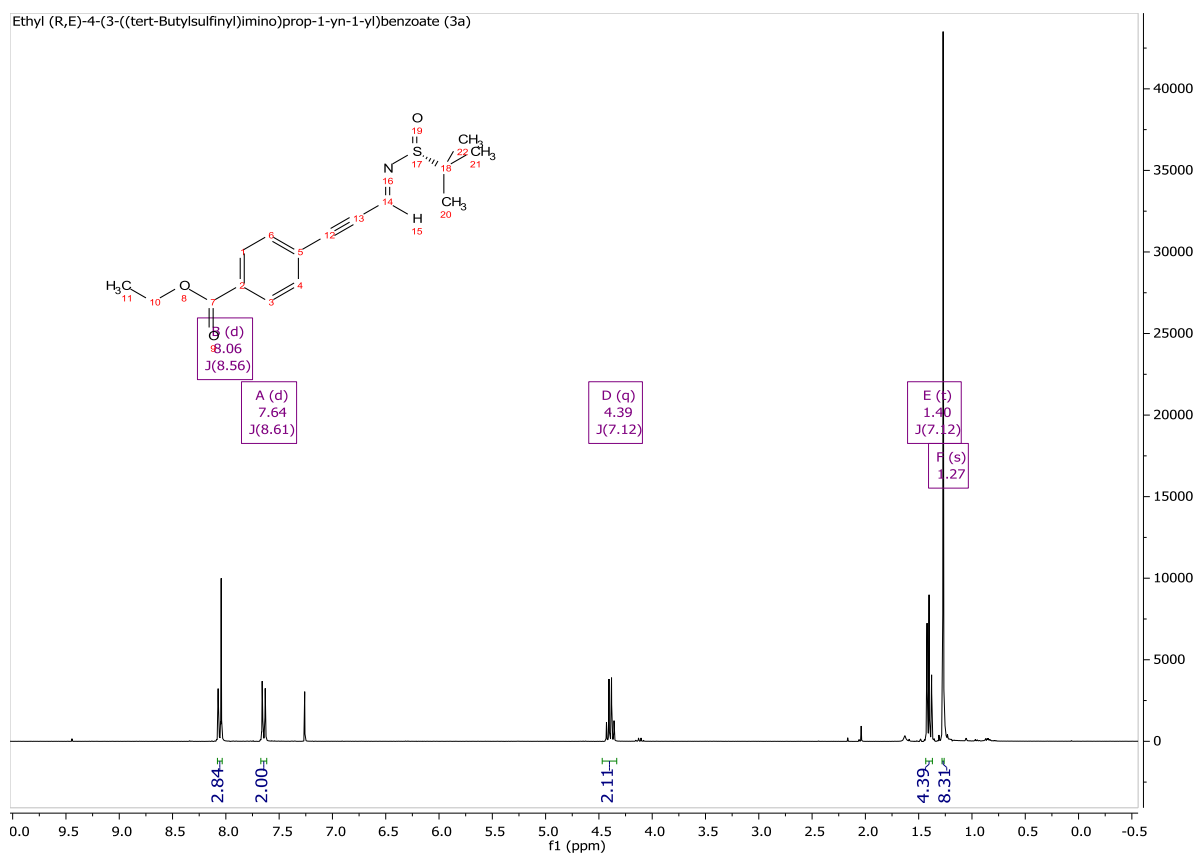

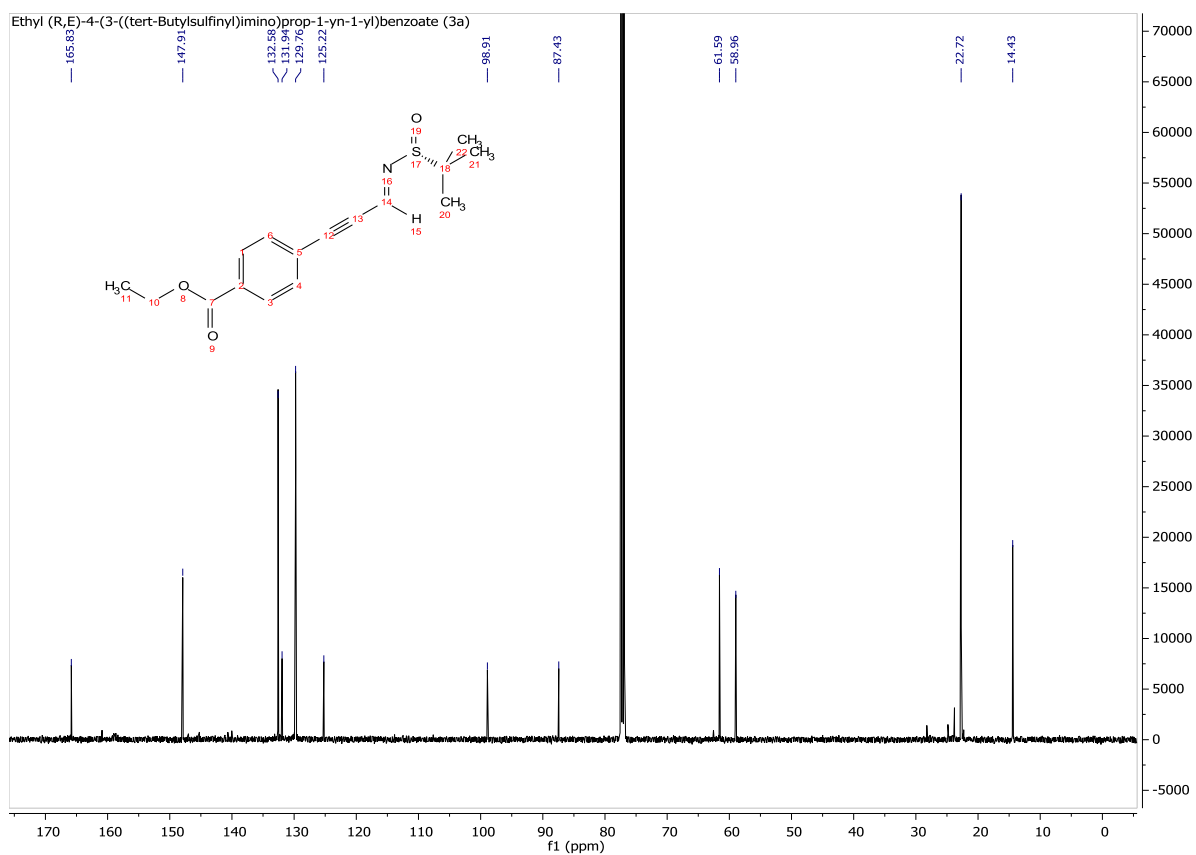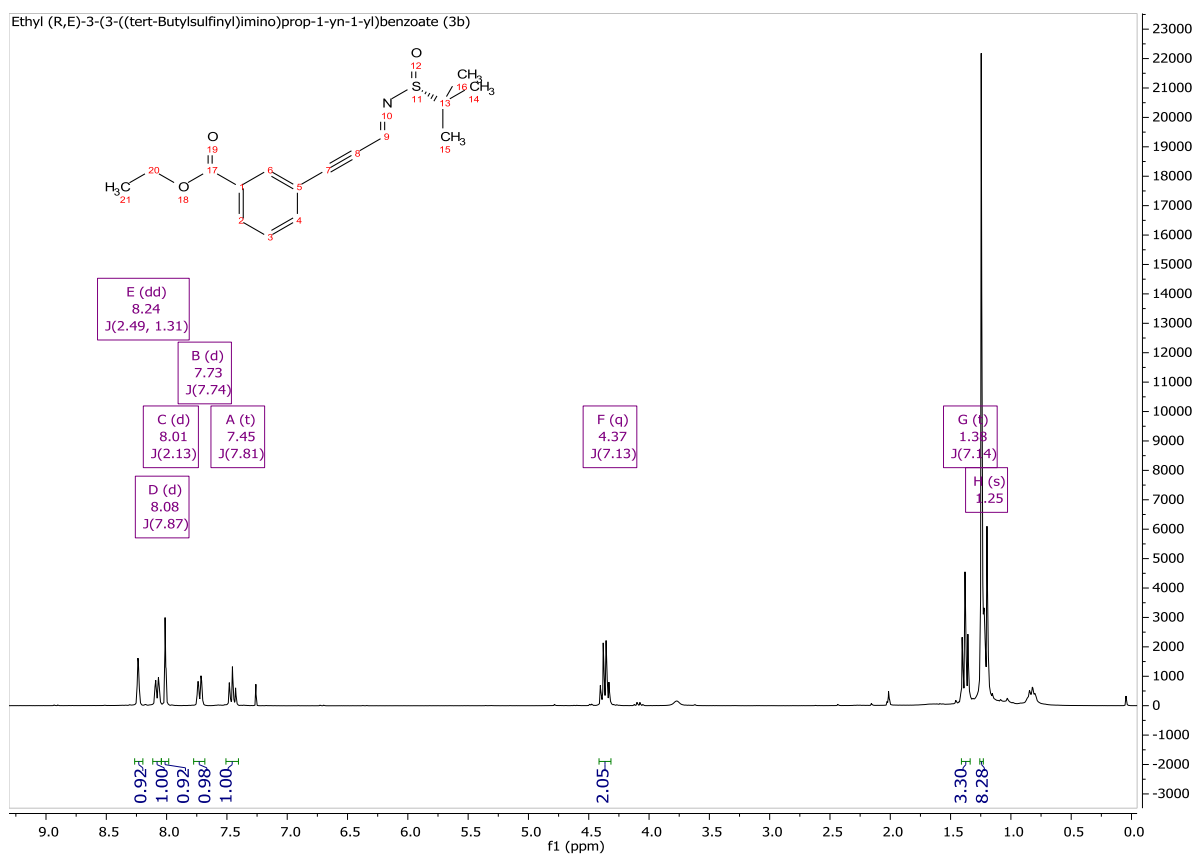

# Ethyl benzoate substituted propargylamine derivatives **4**

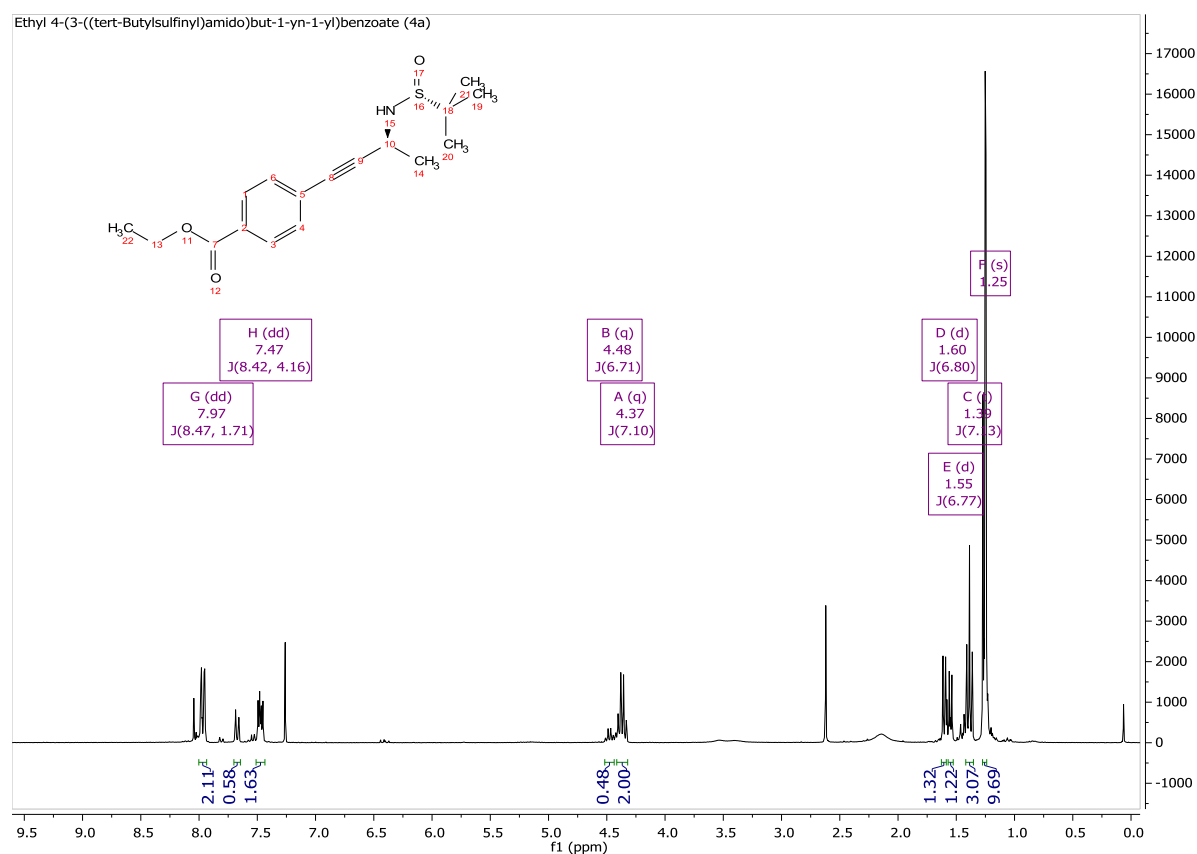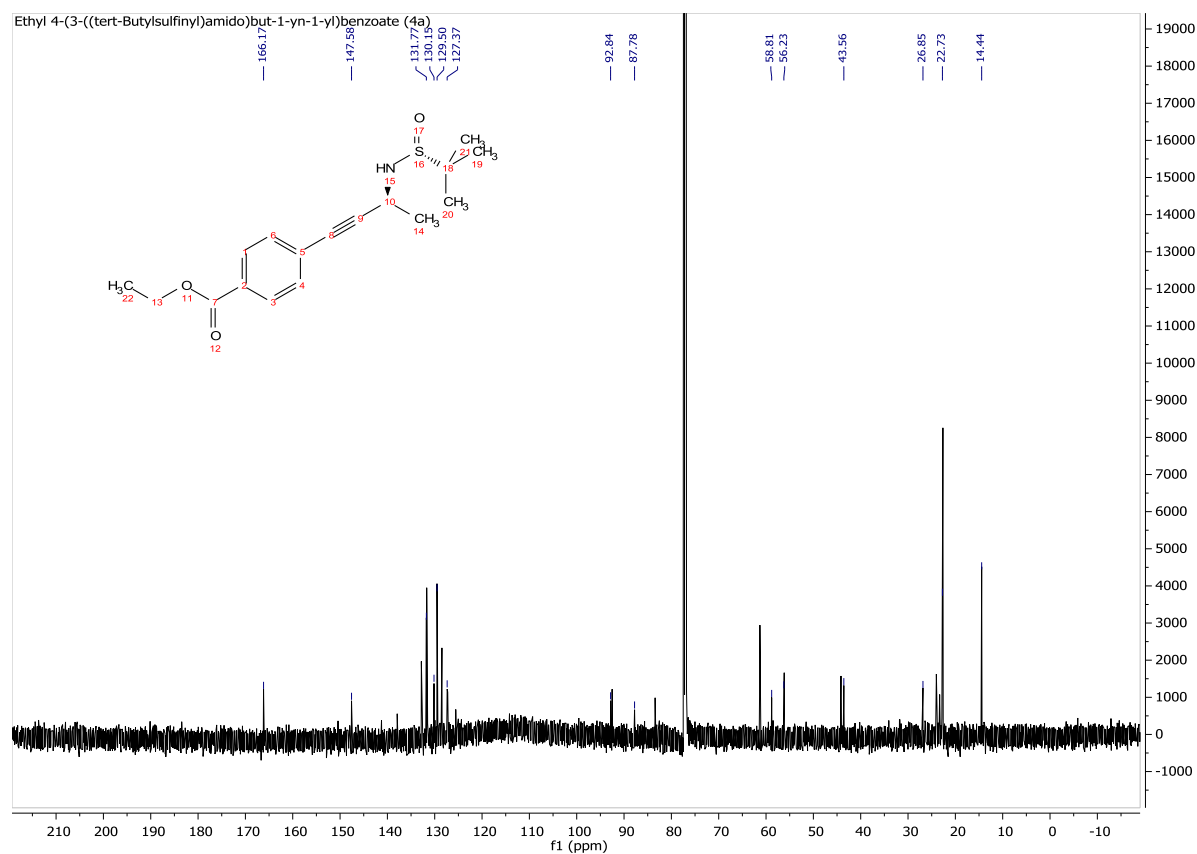

Ethyl 3-((R)-3-(((R)-tert-Butylsulfinyl)amido)-4-methylpent-1-yn-1-yl)benzoate (4b)

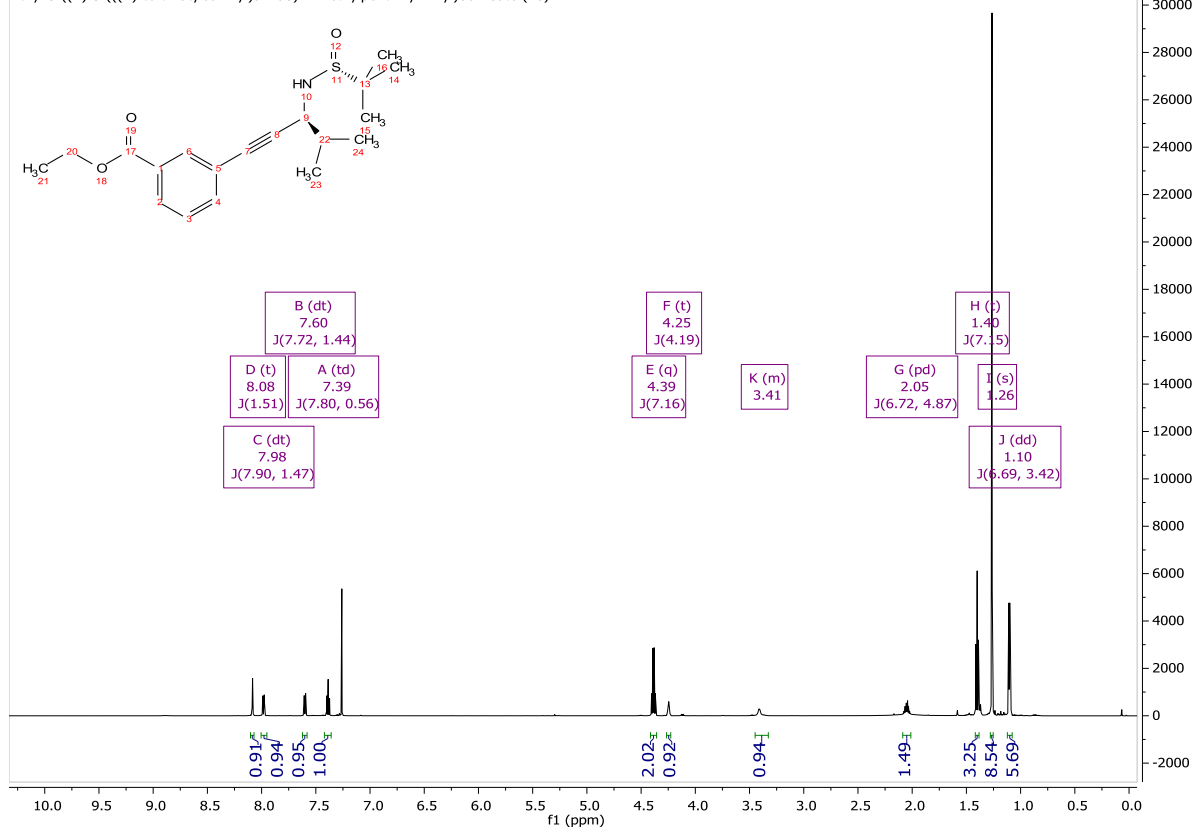

Ethyl 3-((R)-3-(((R)-tert-Butylsulfinyl)amido)-4-methylpent-1-yn-1-yl)benzoate (4b)

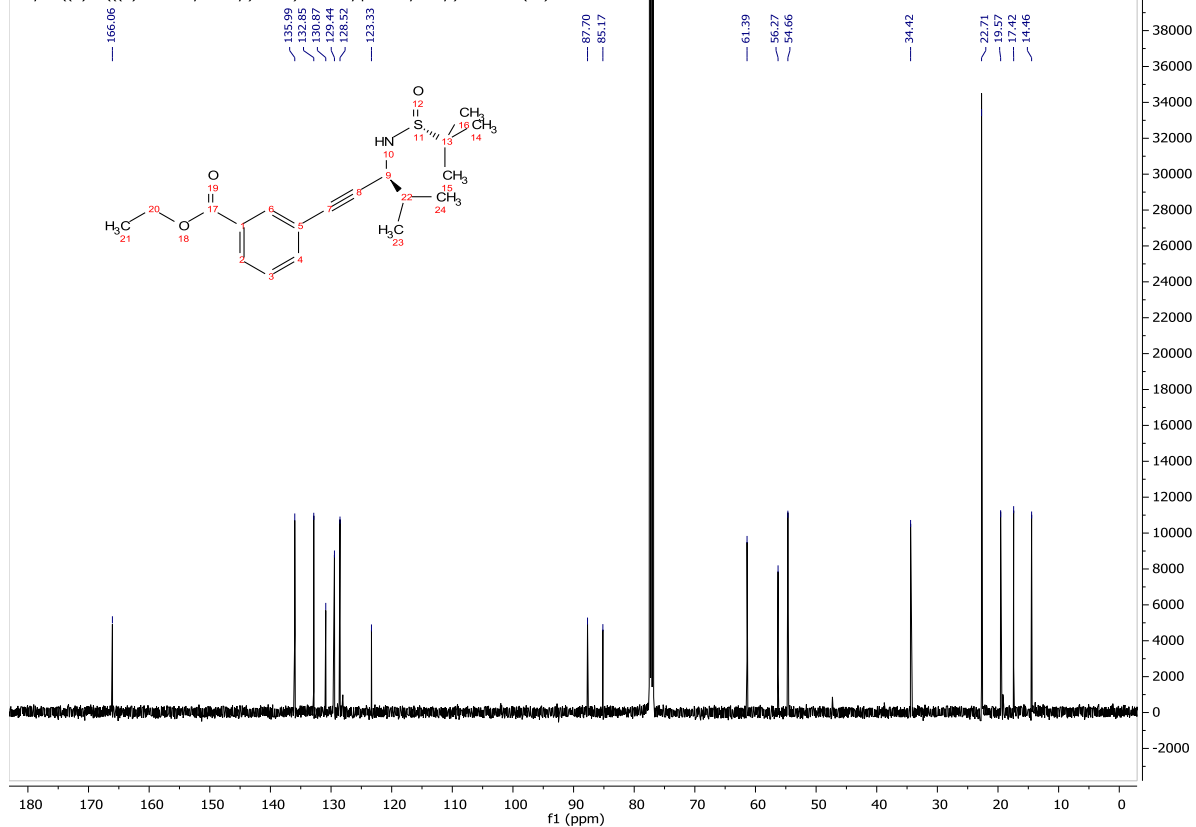

## Chiral aldimines 5

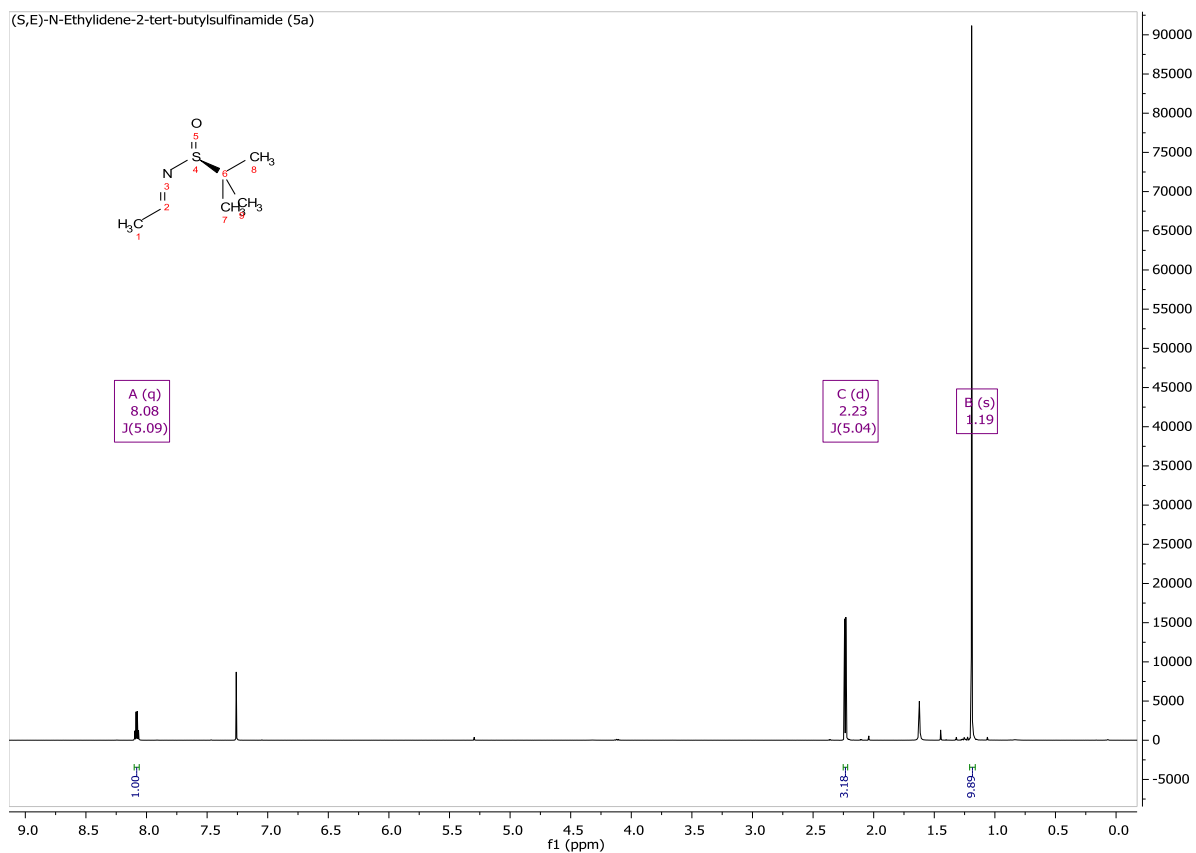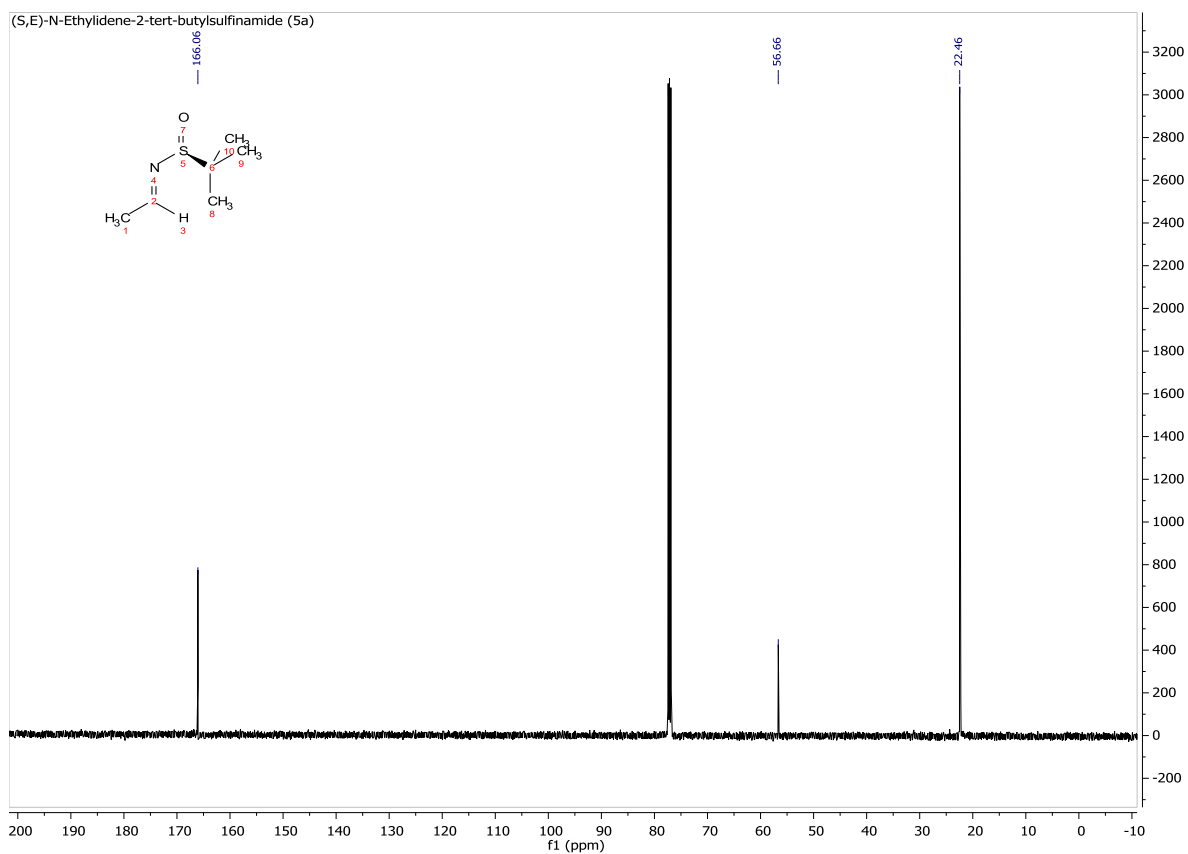

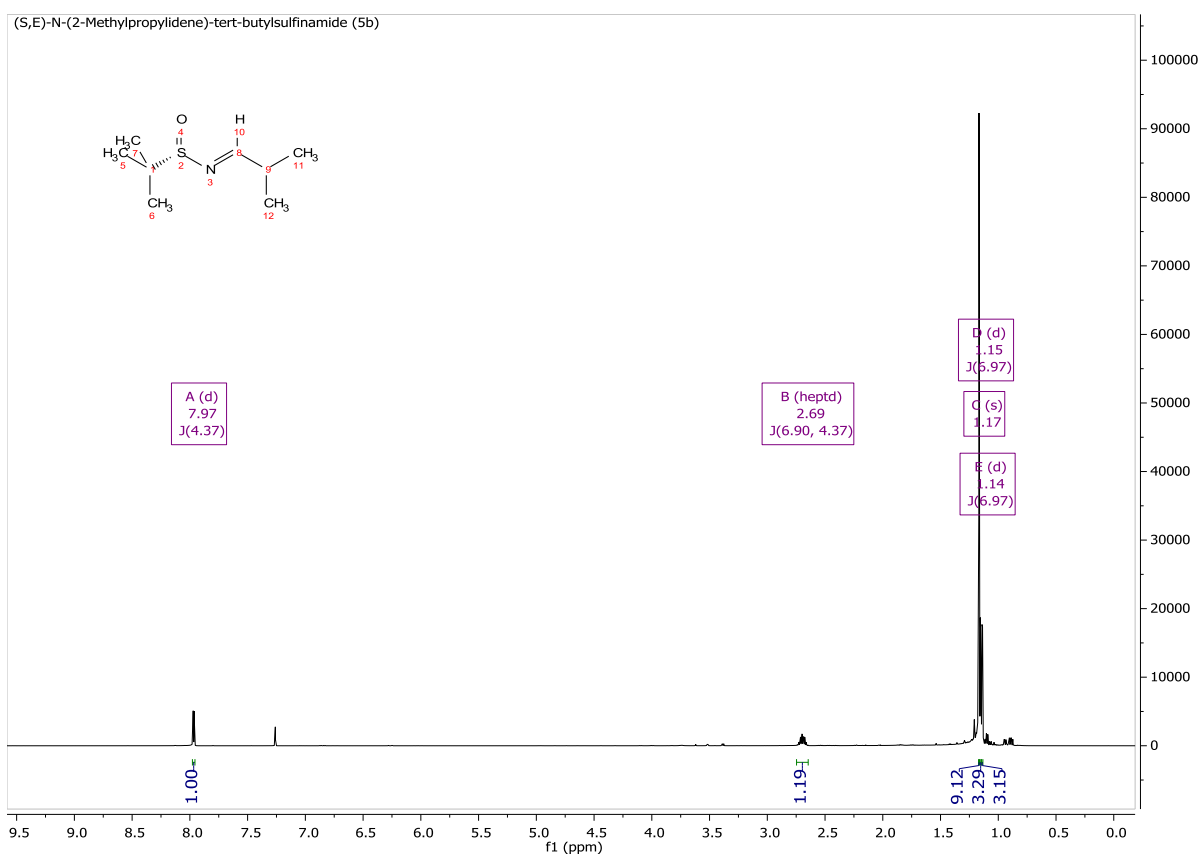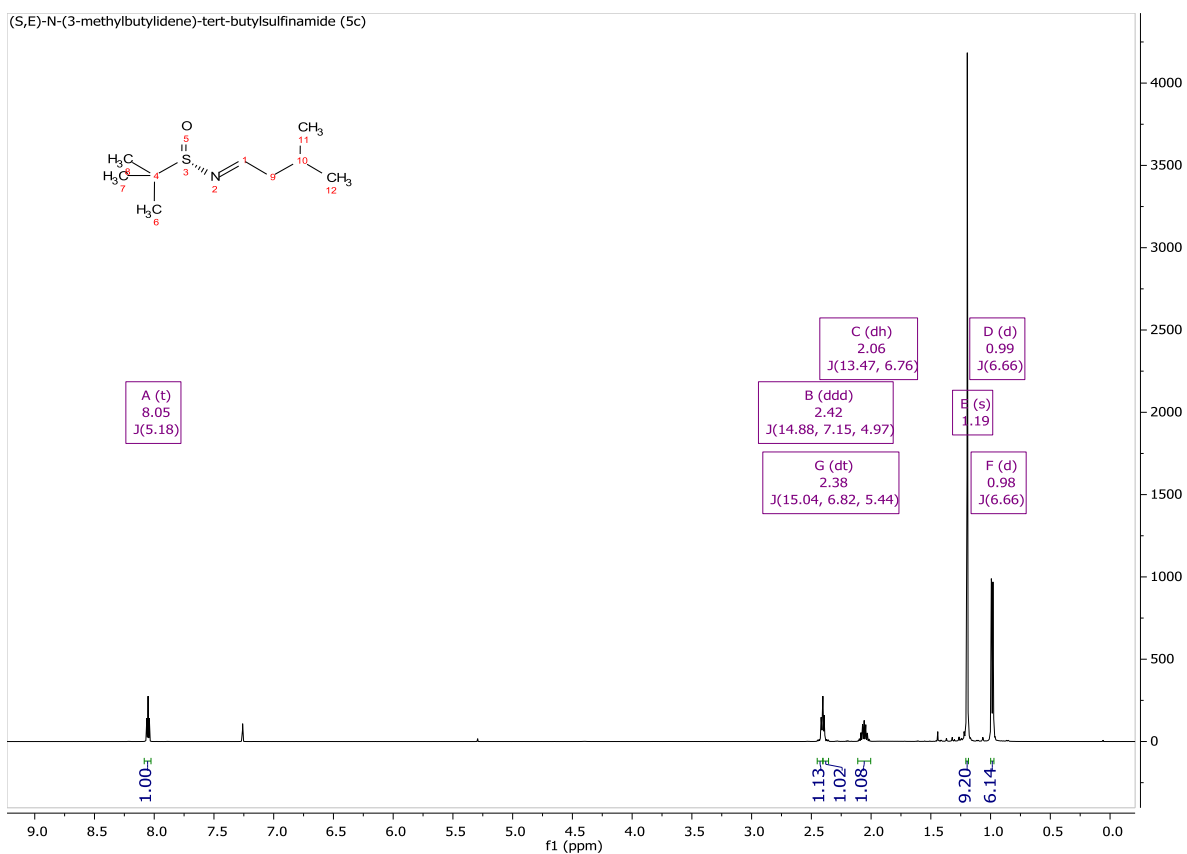

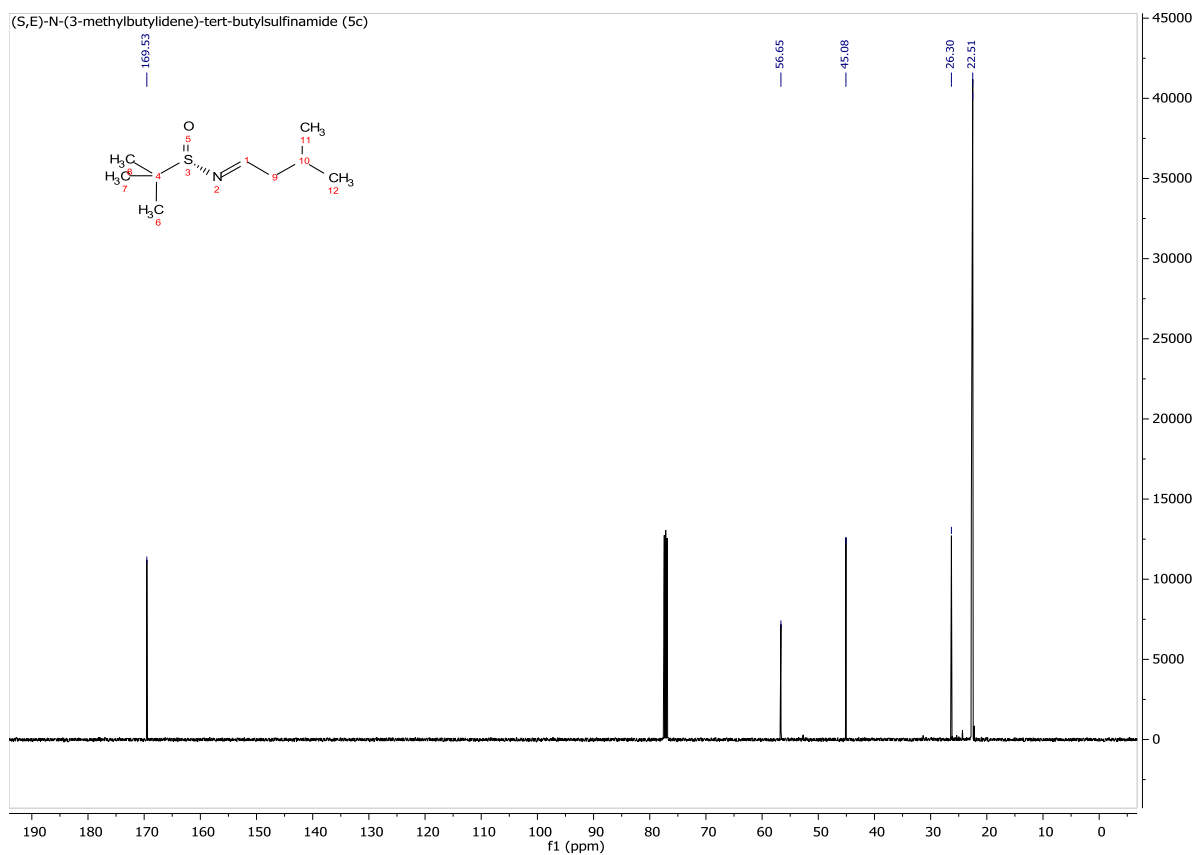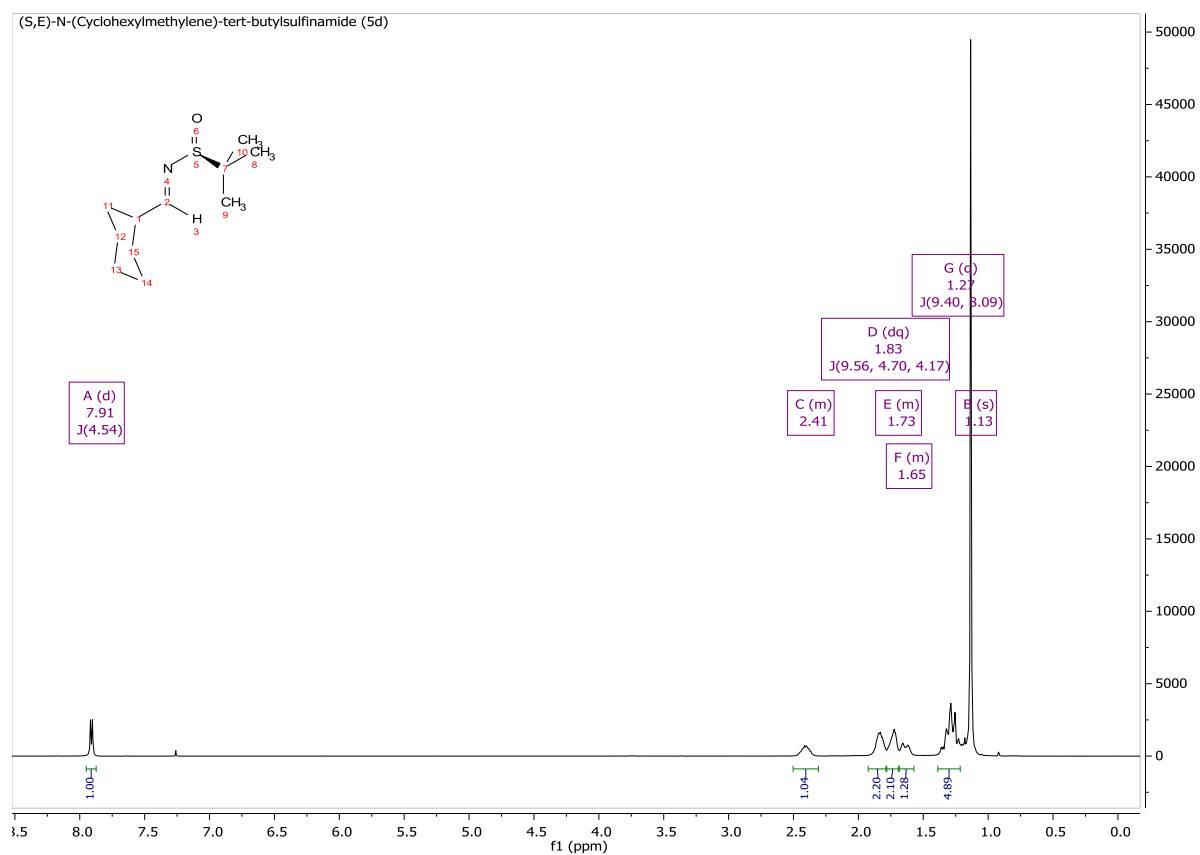



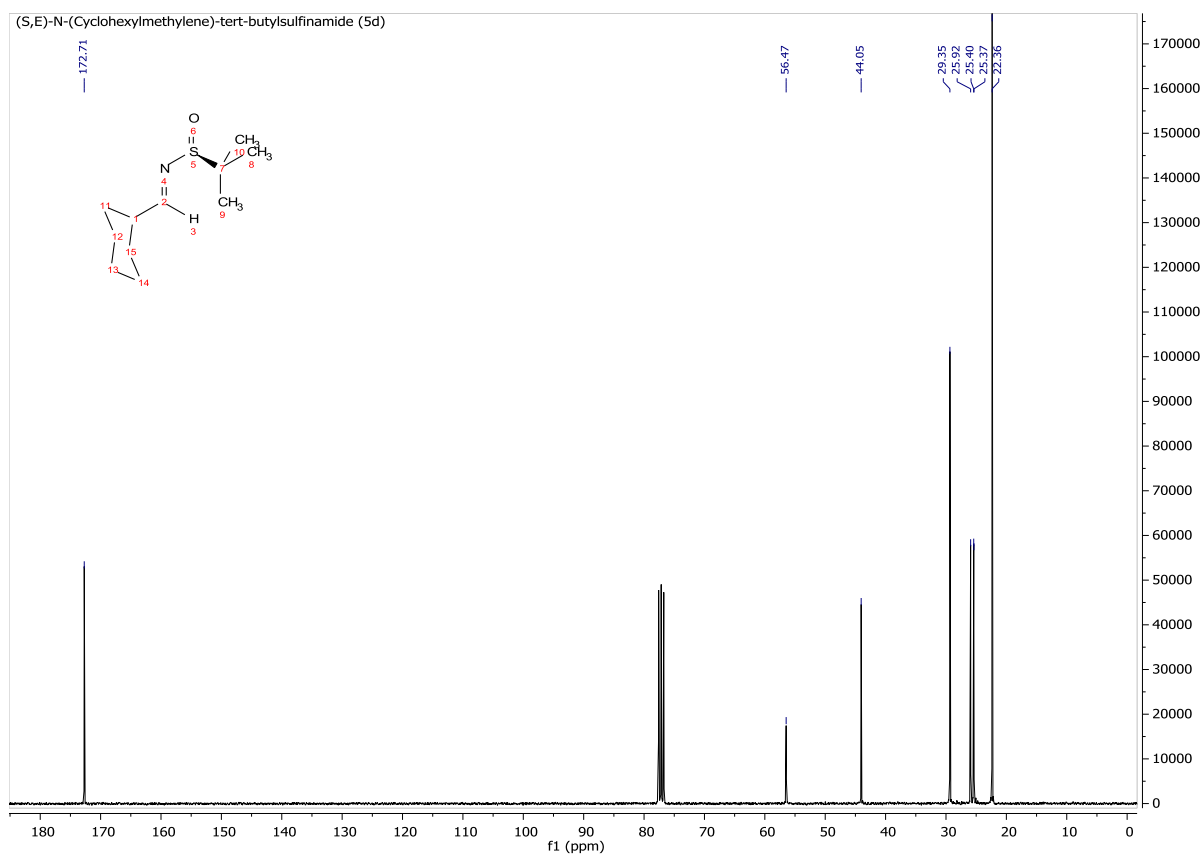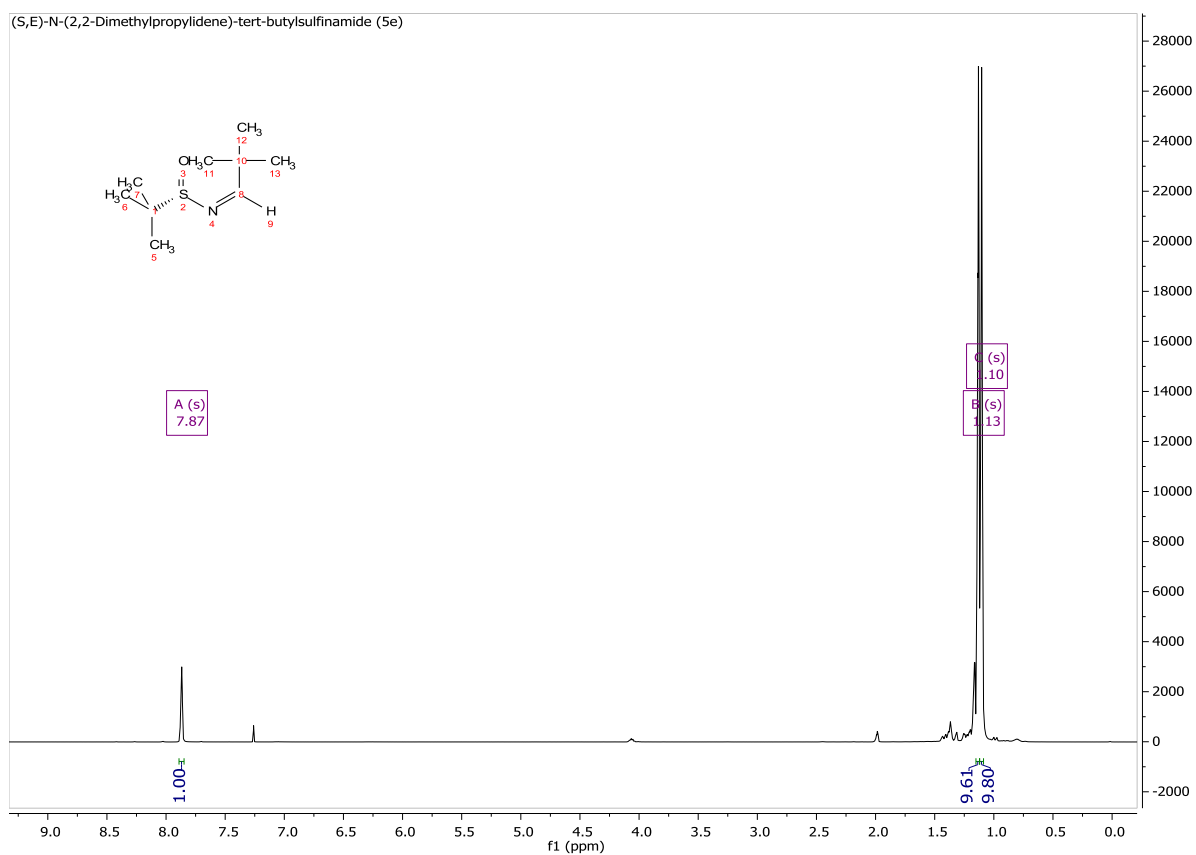

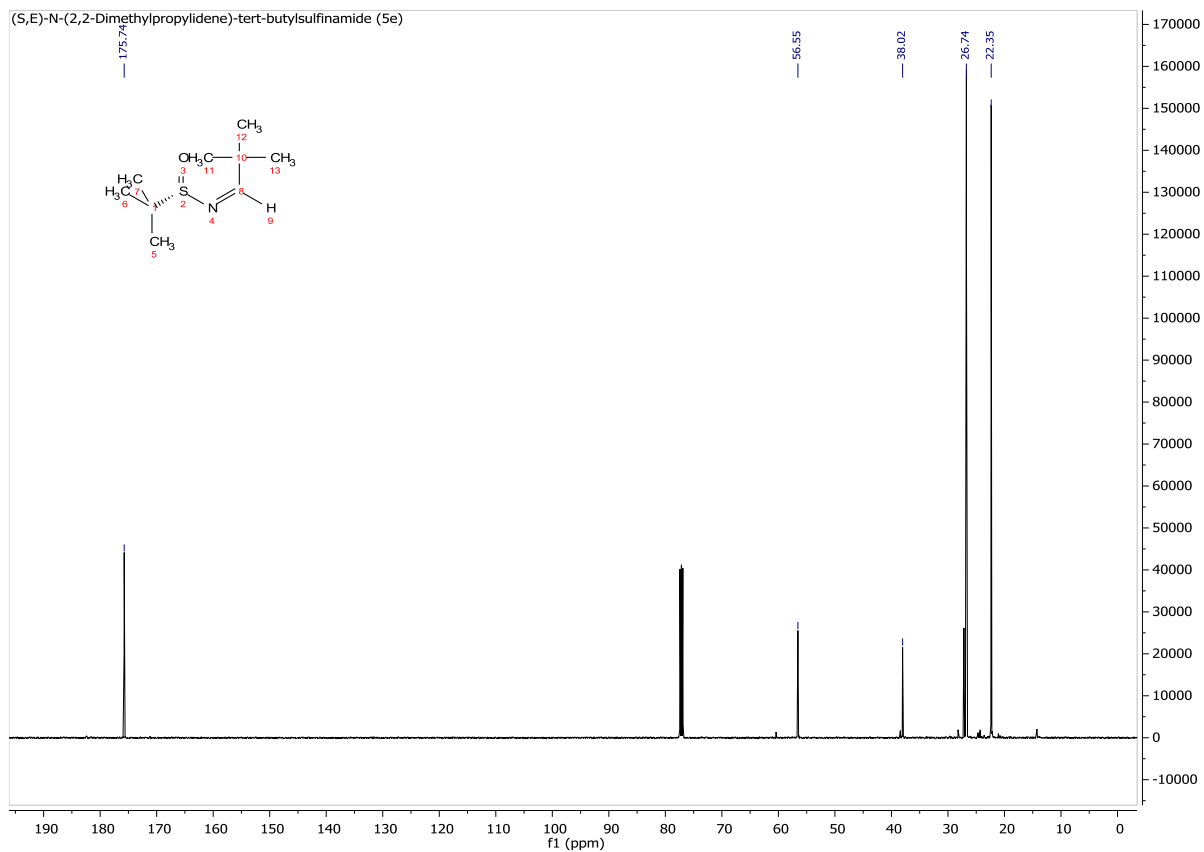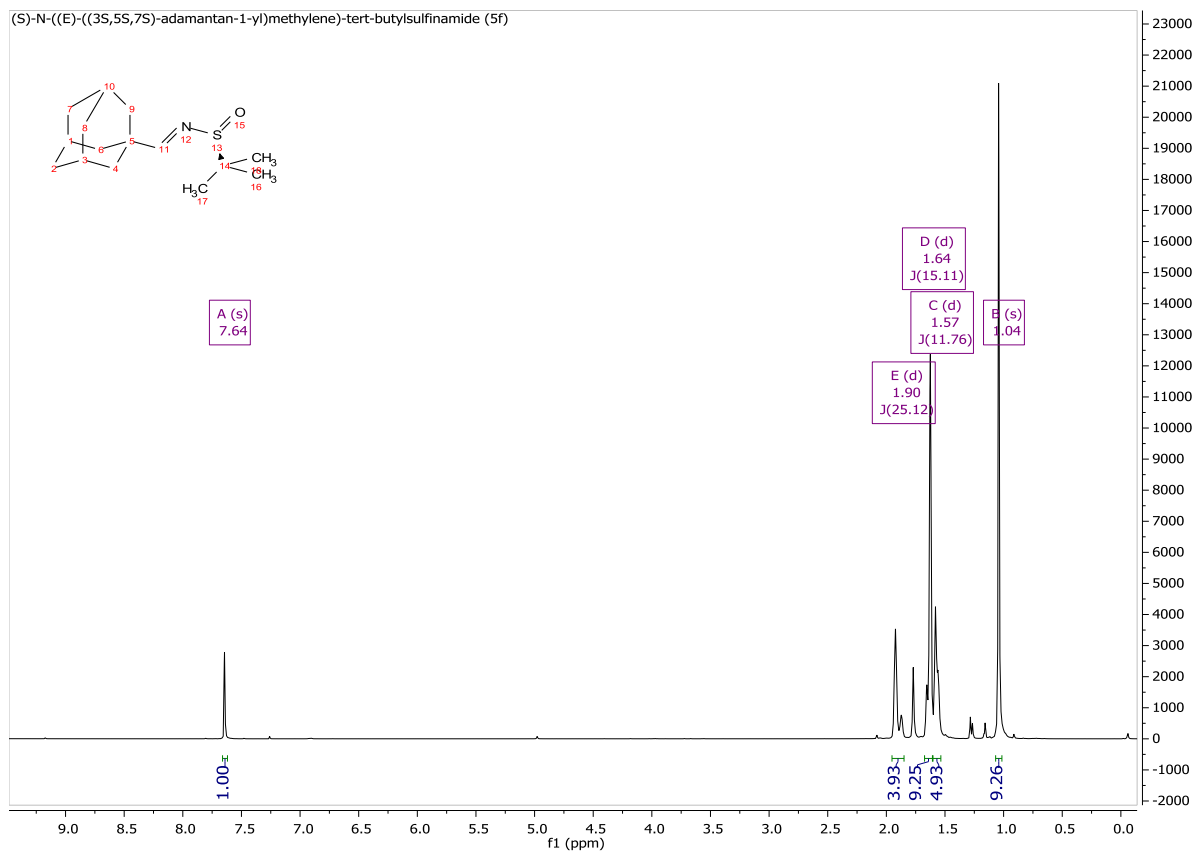

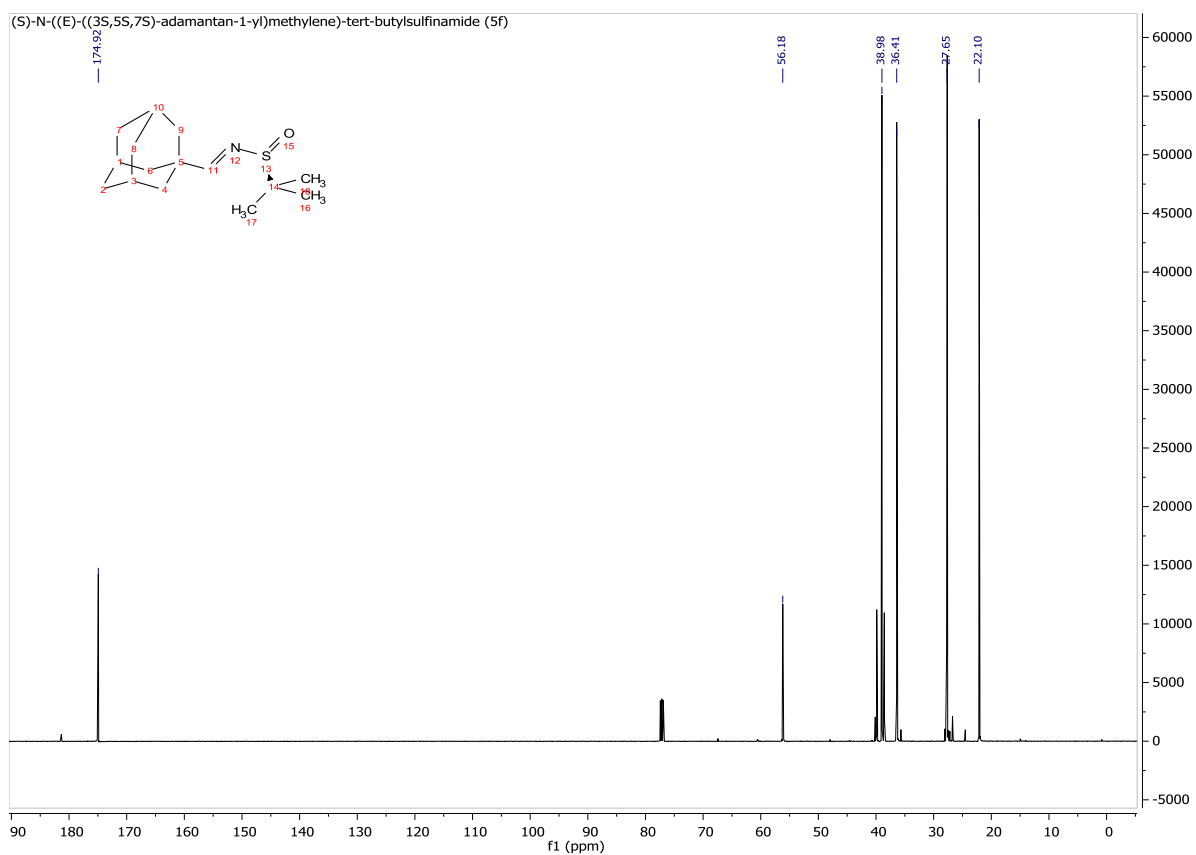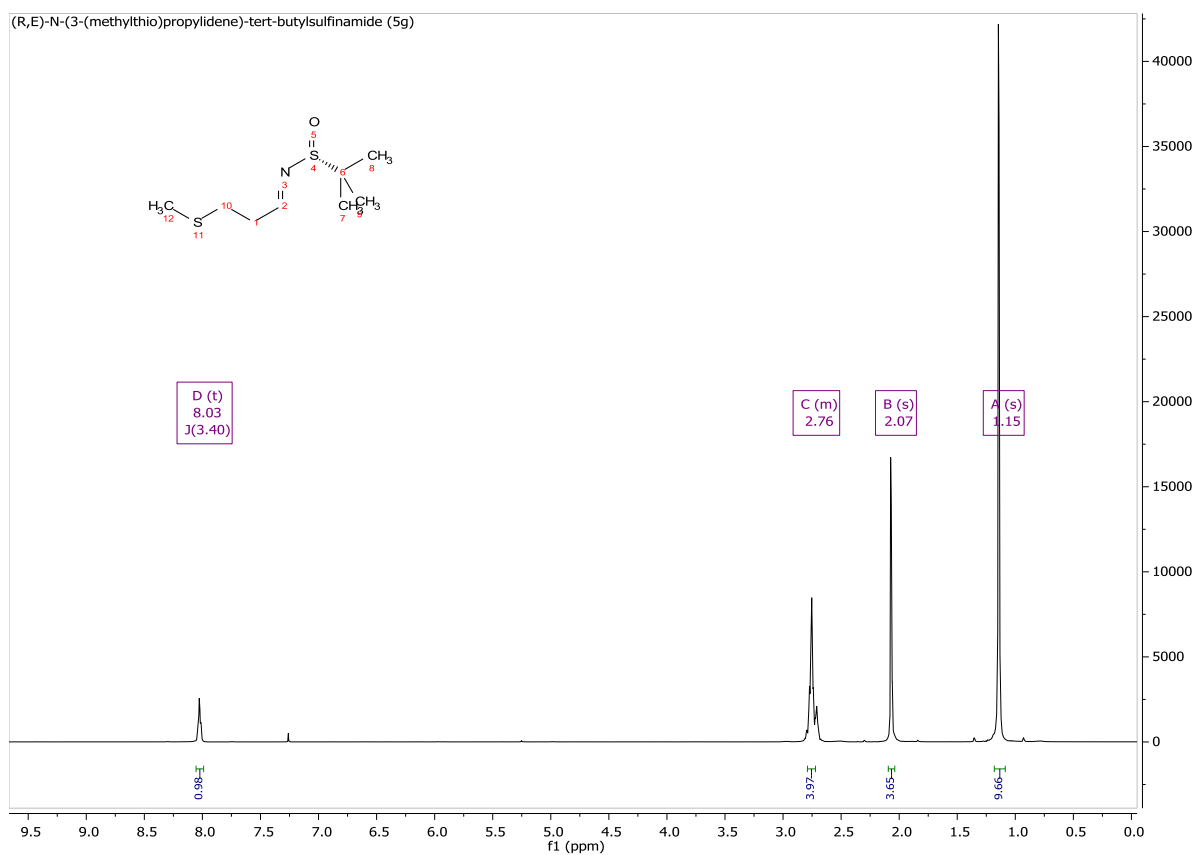

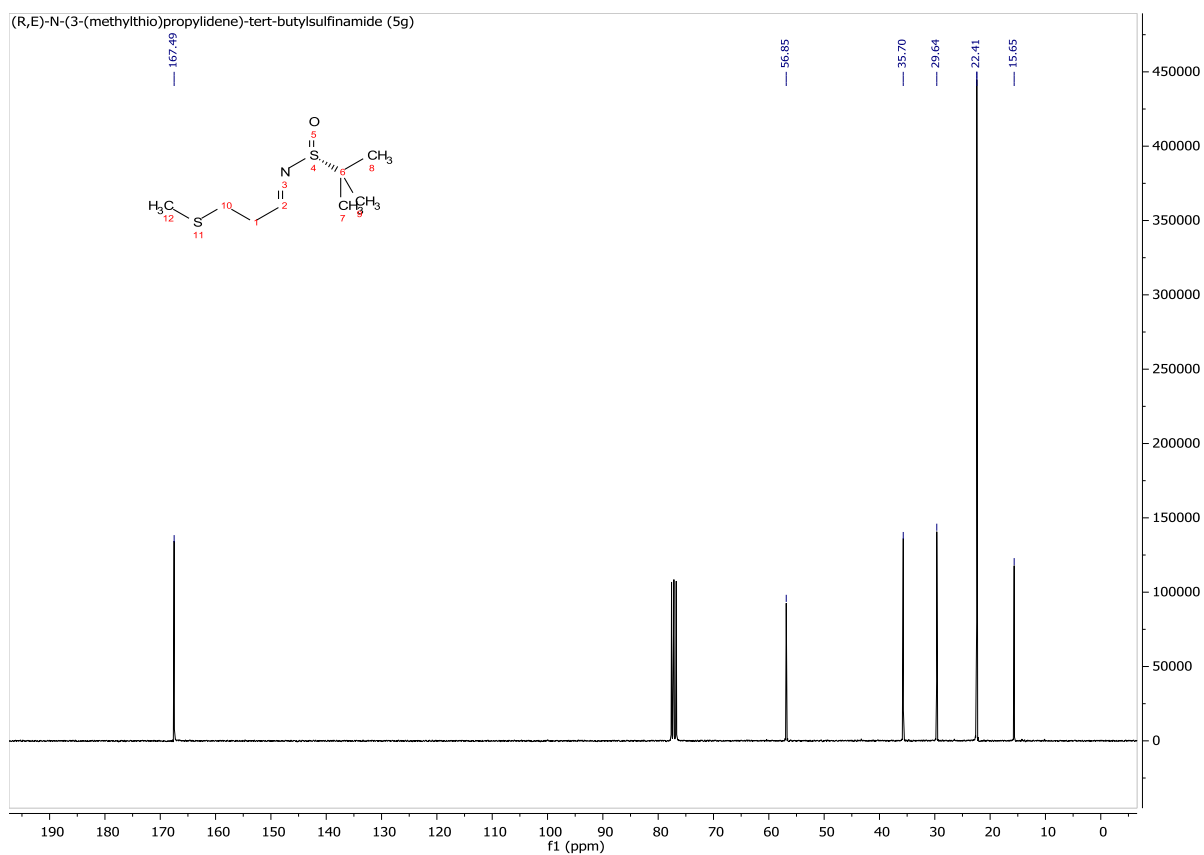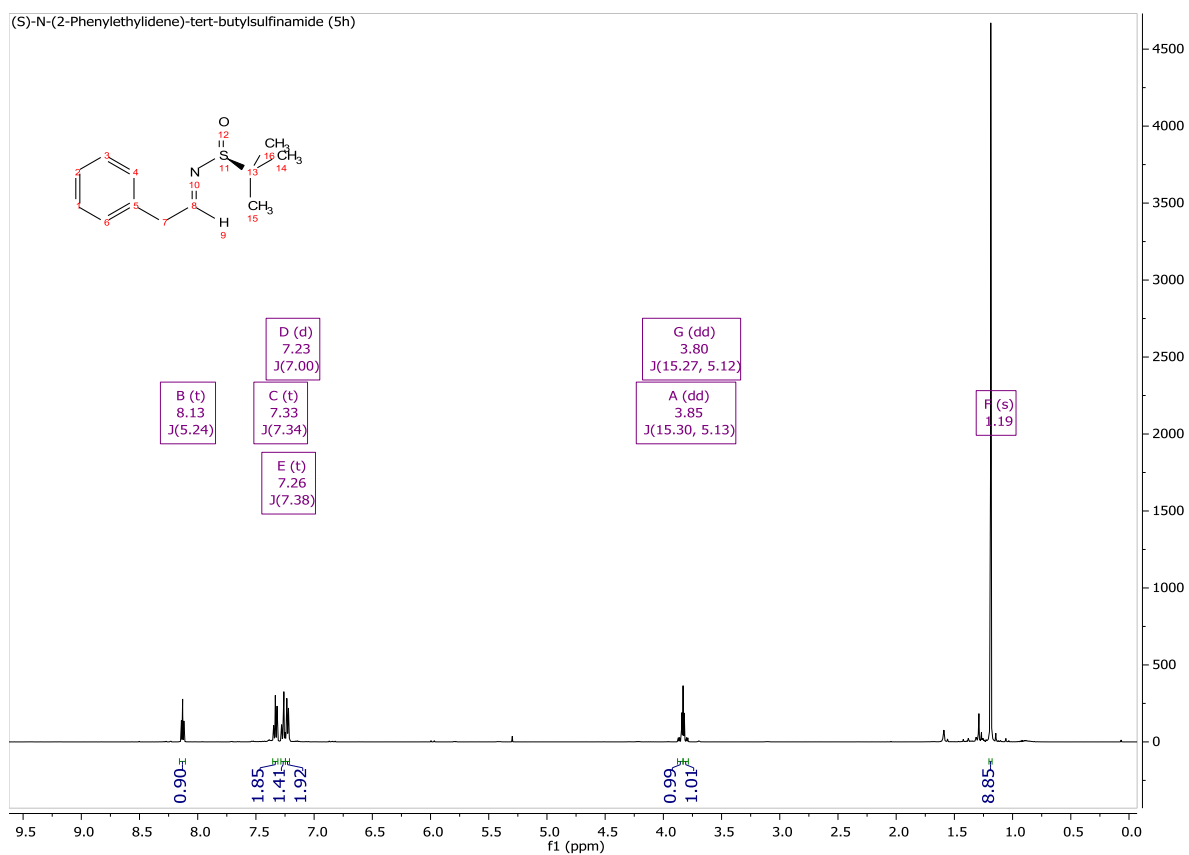

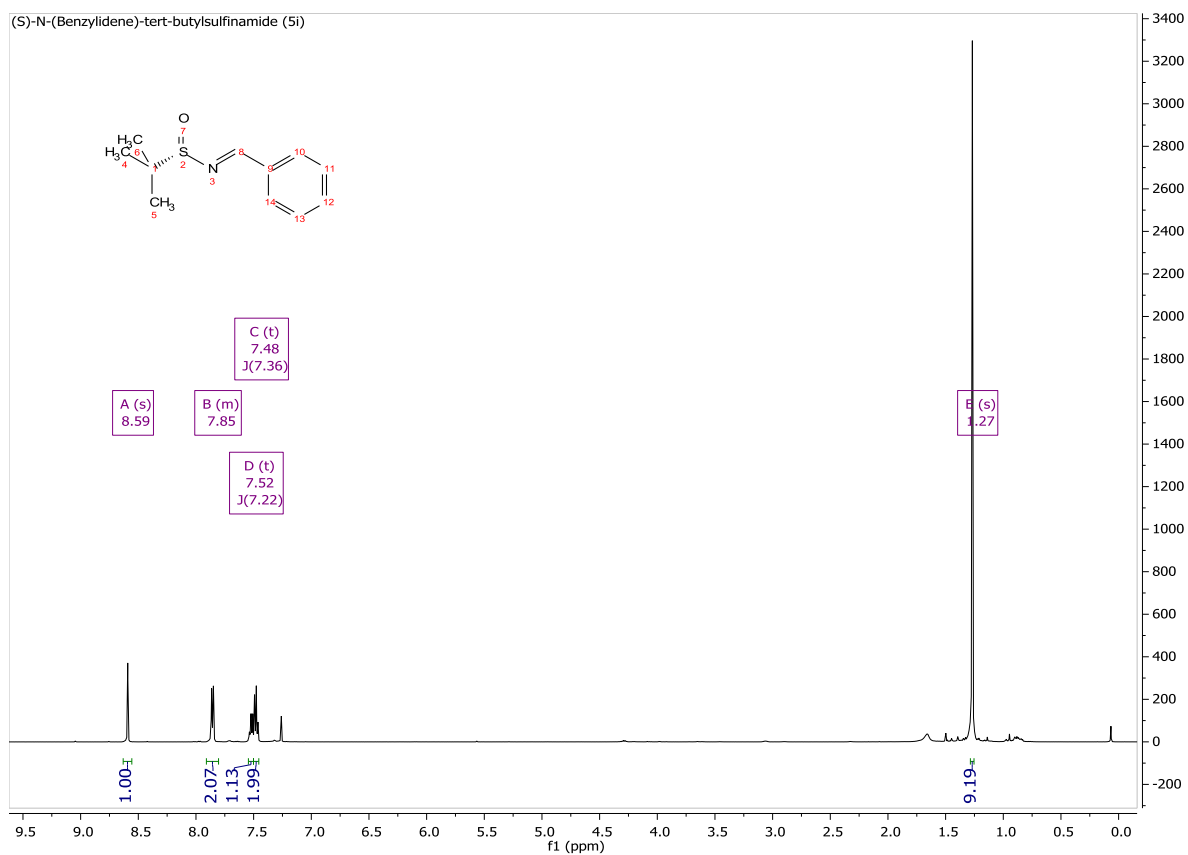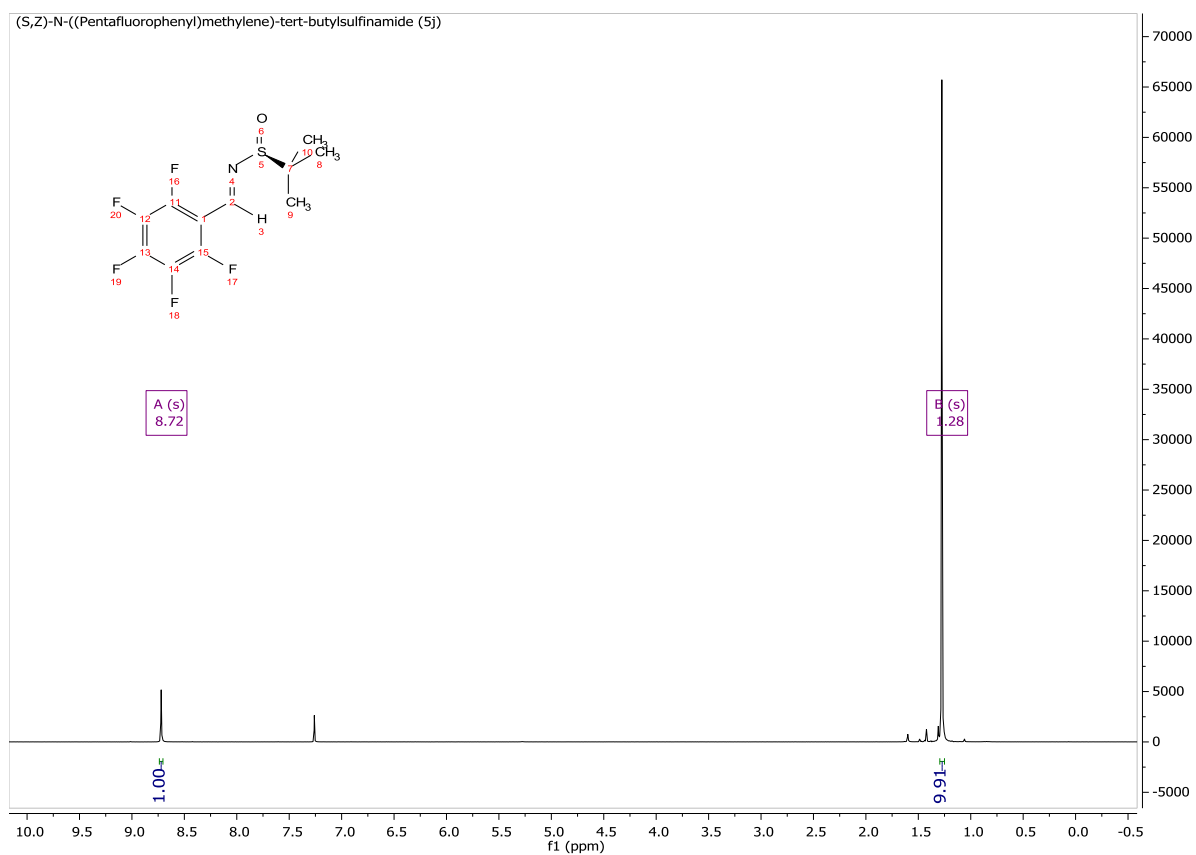

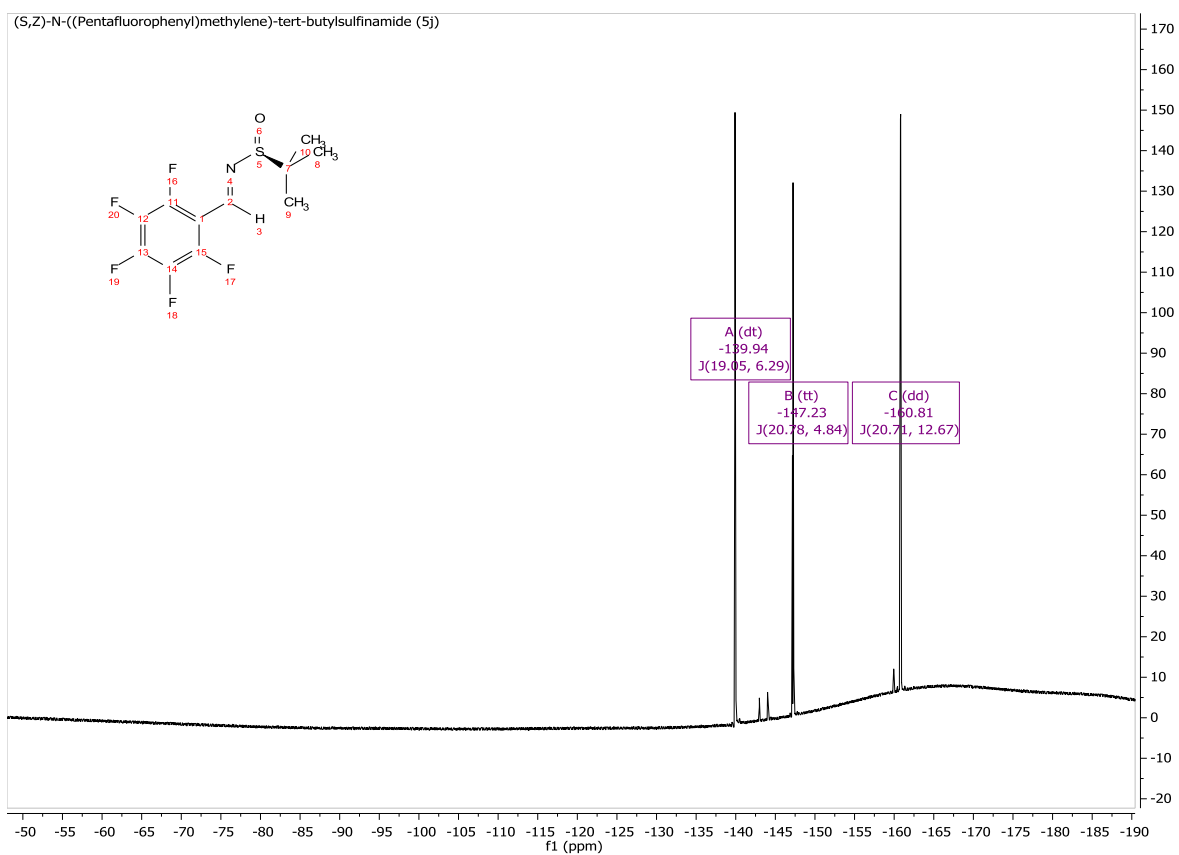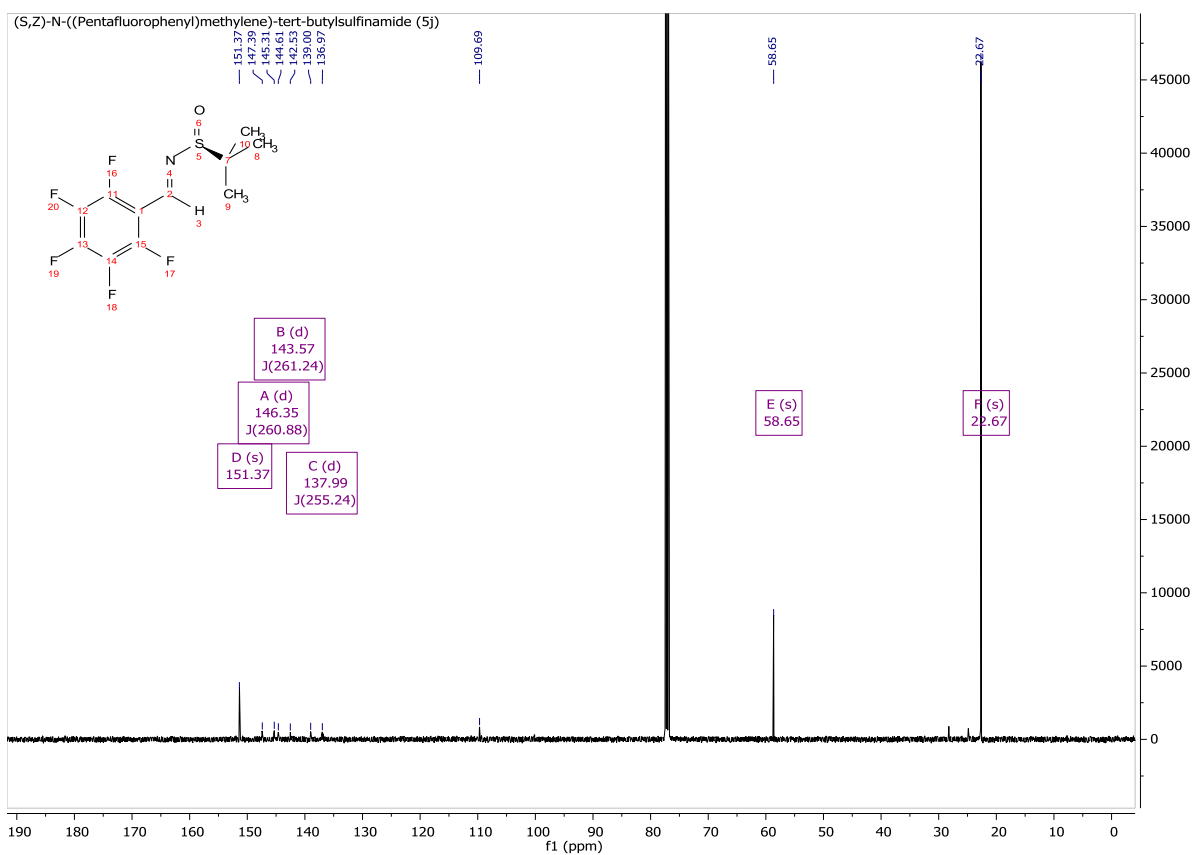

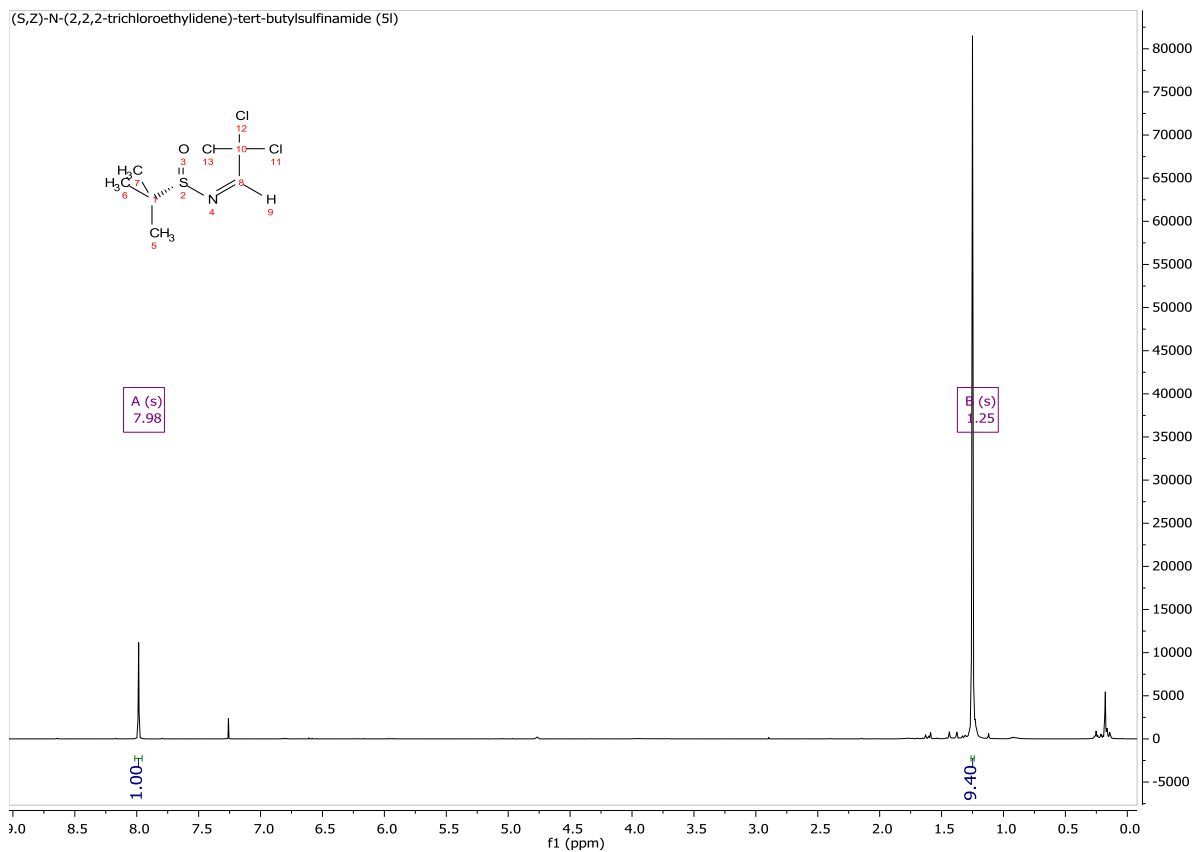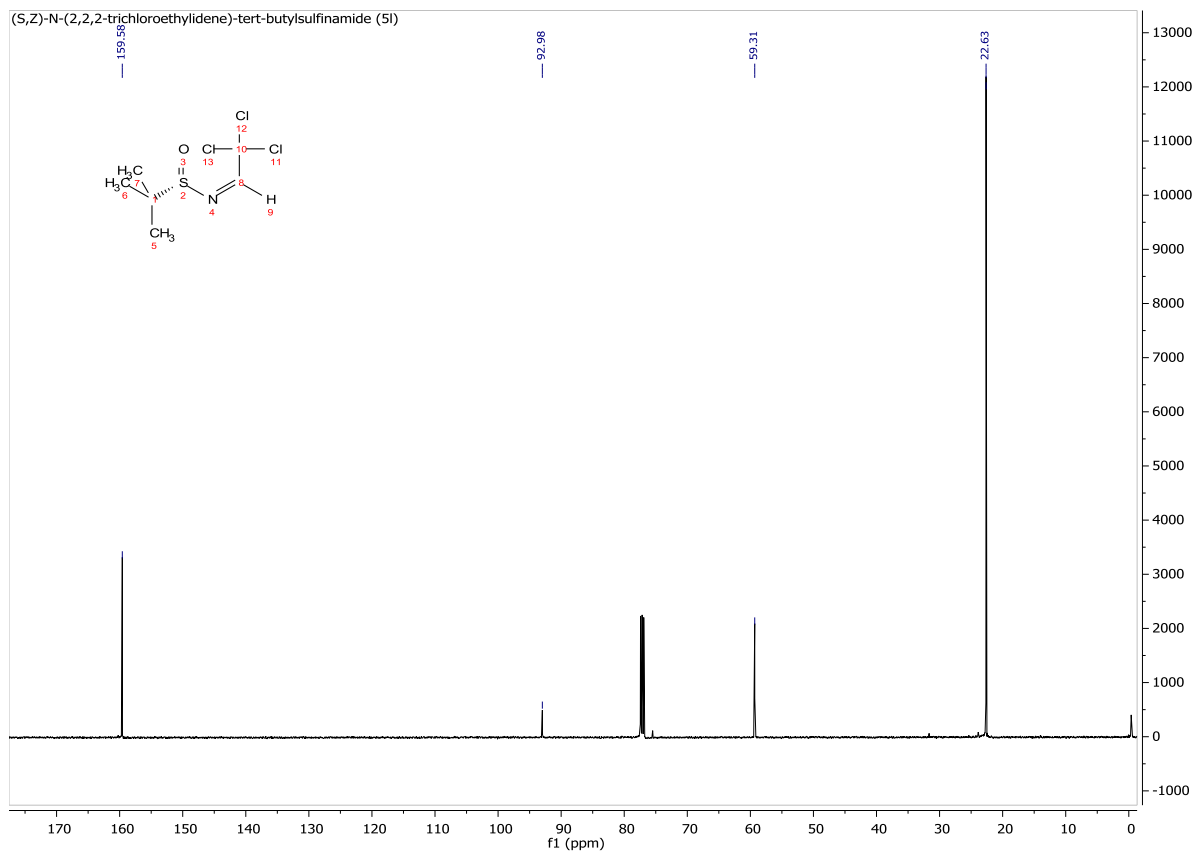

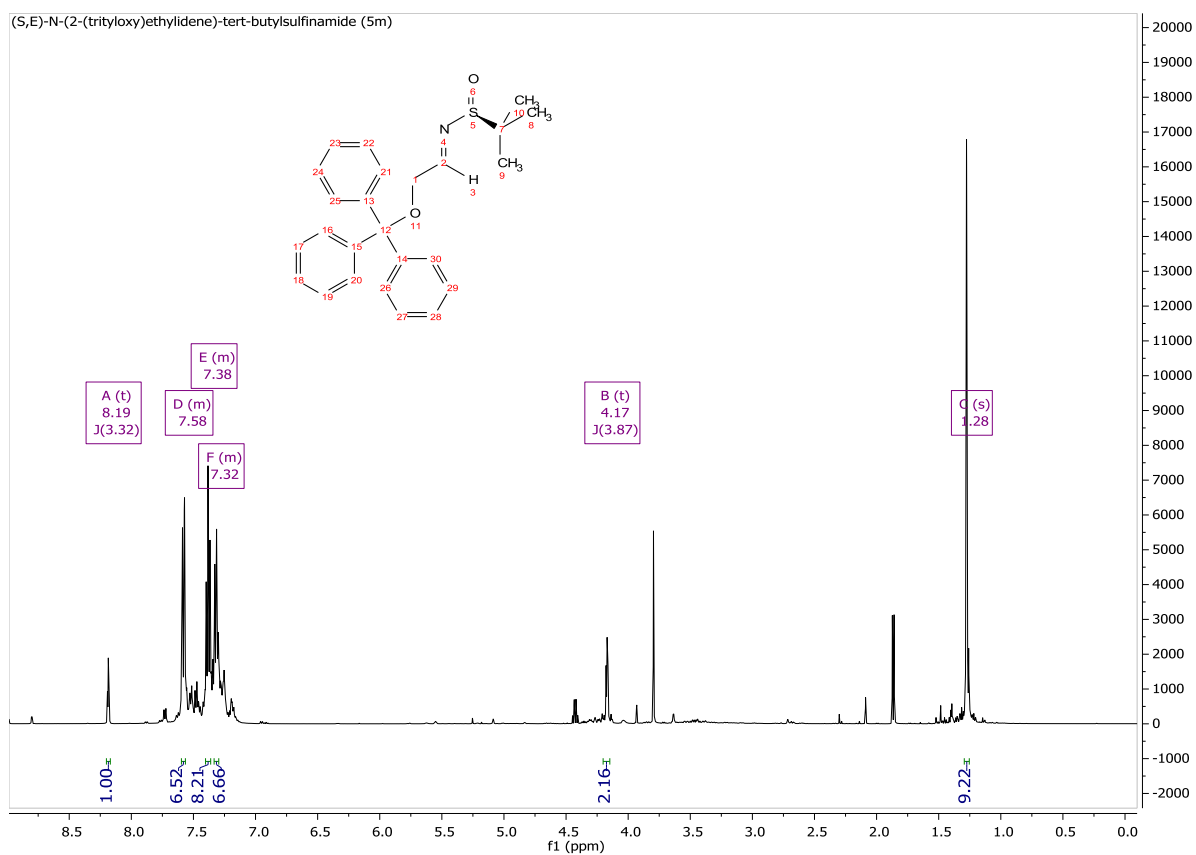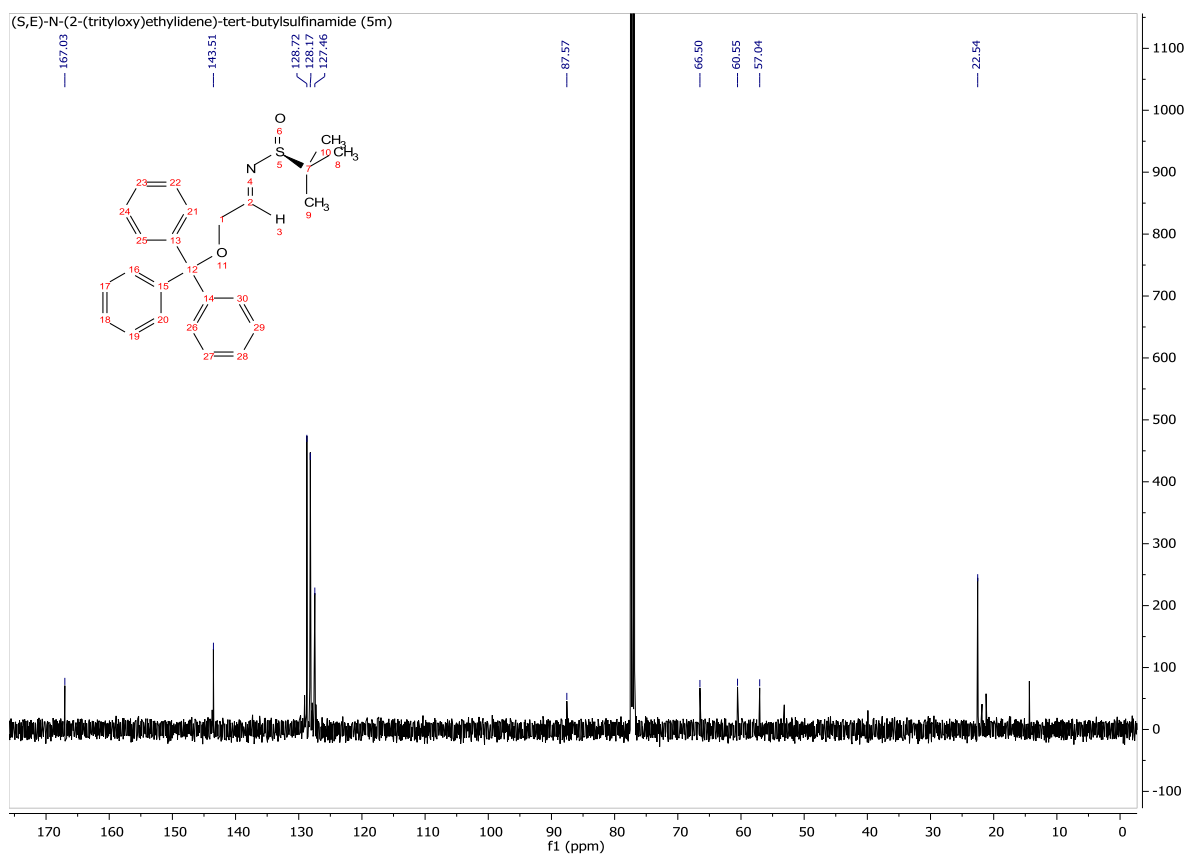



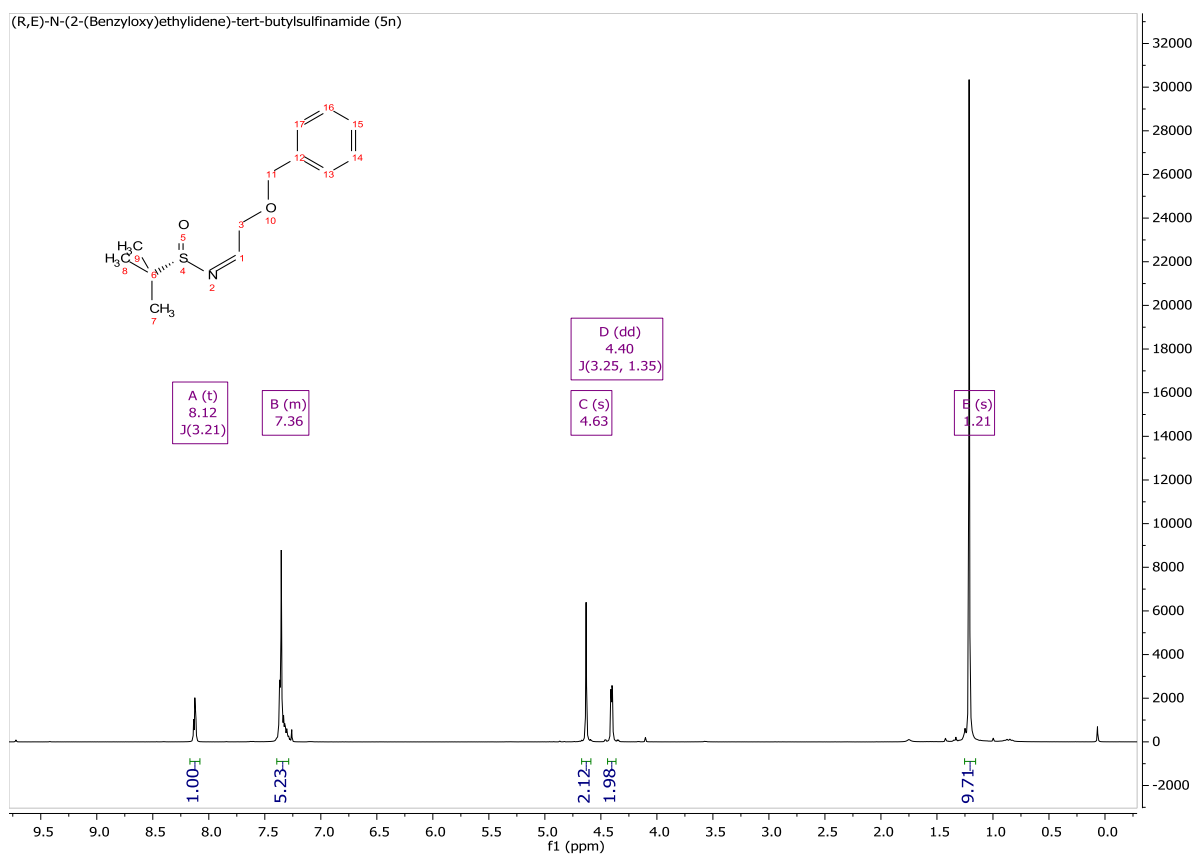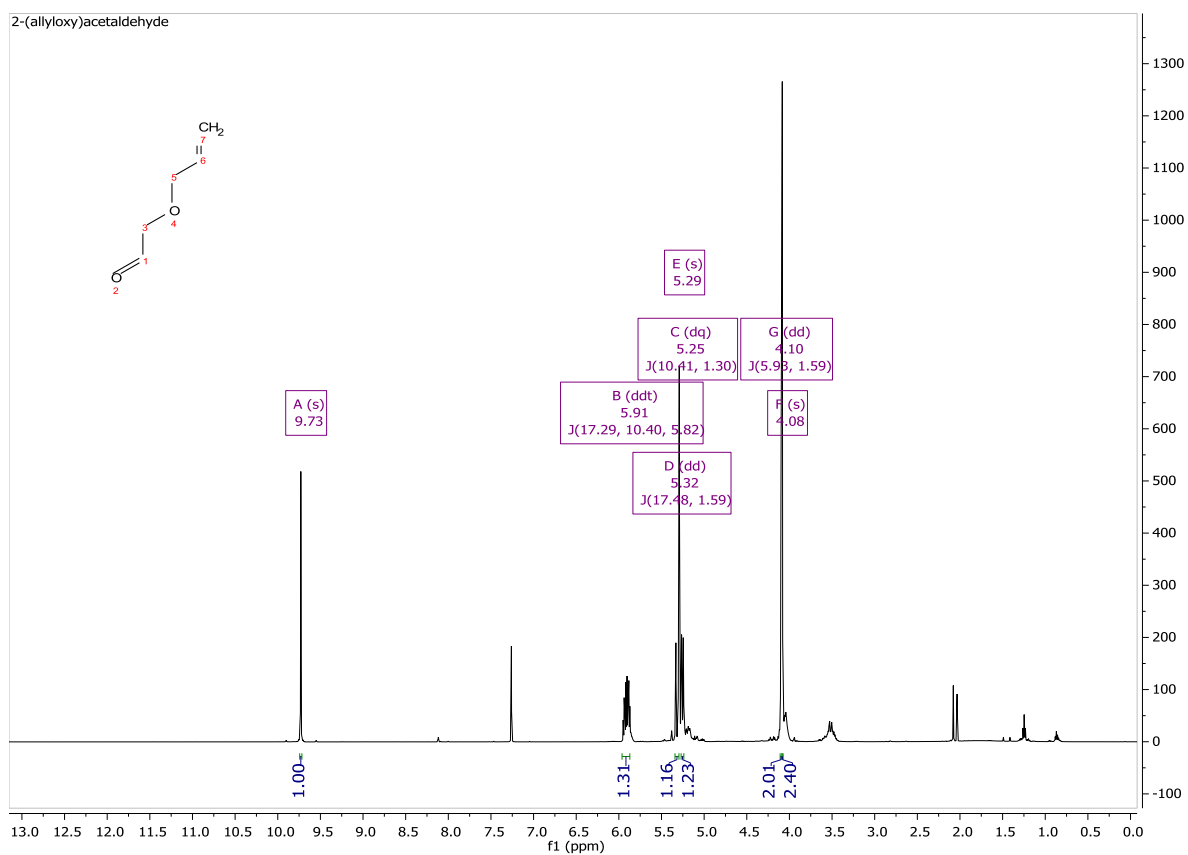

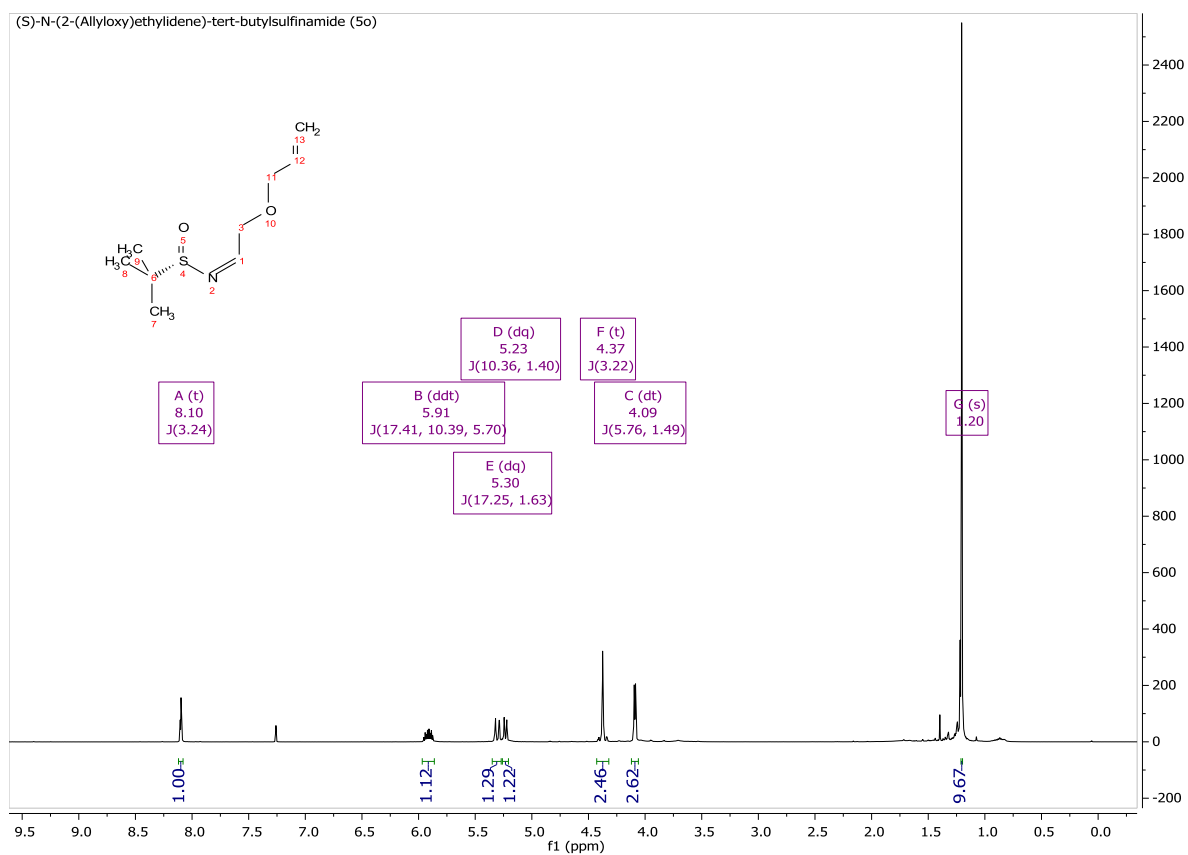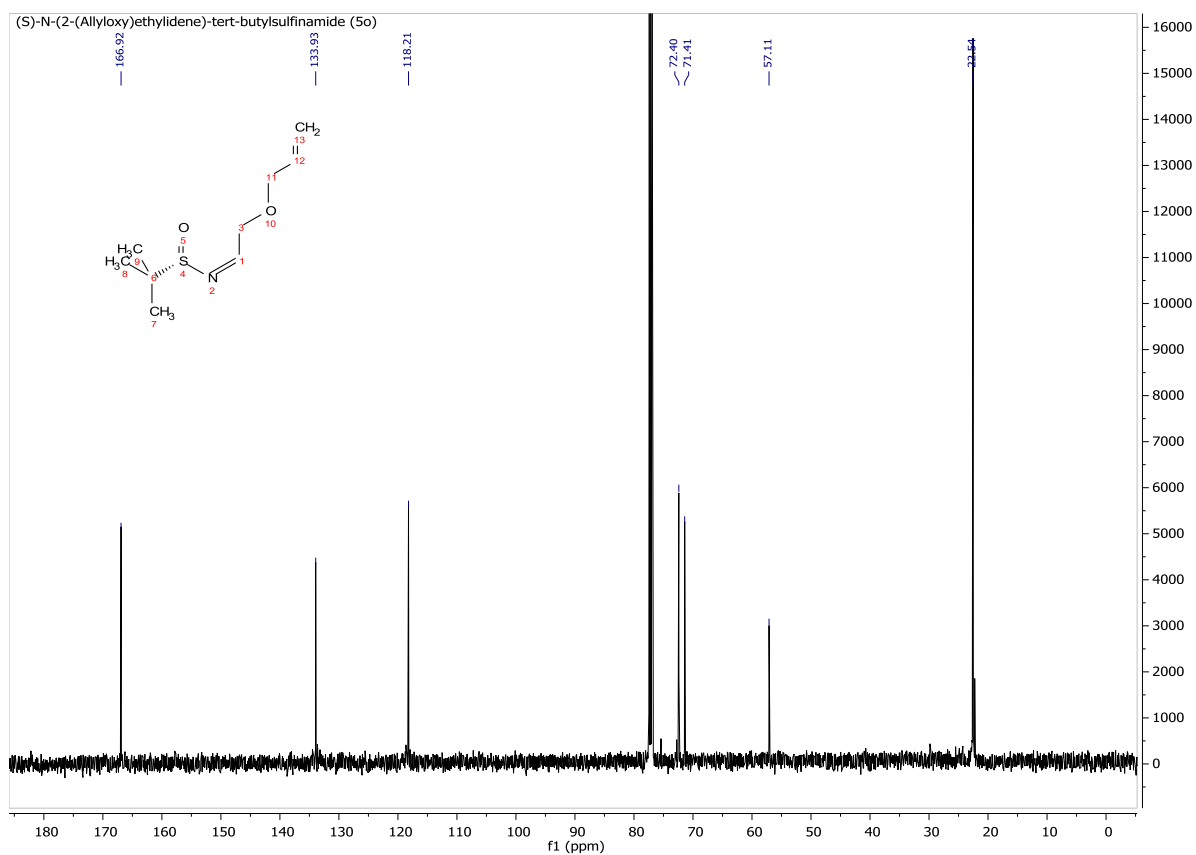

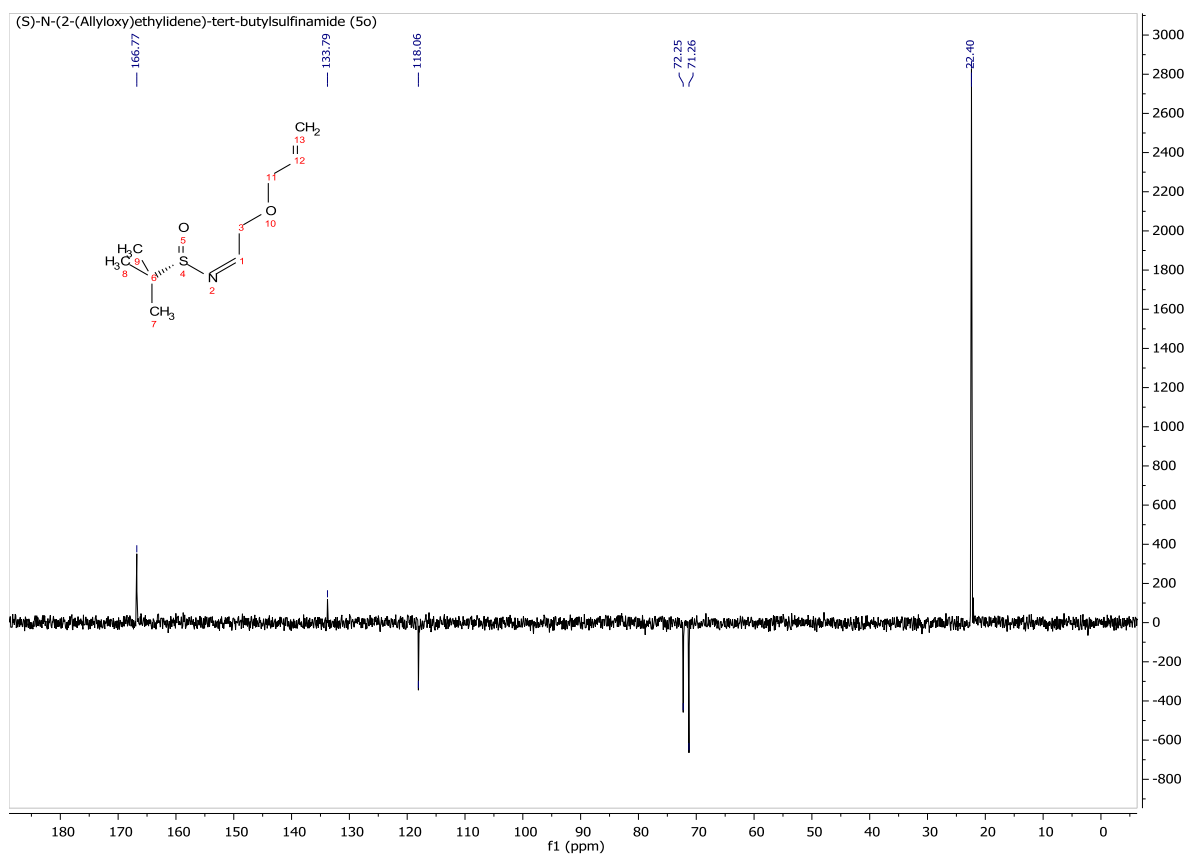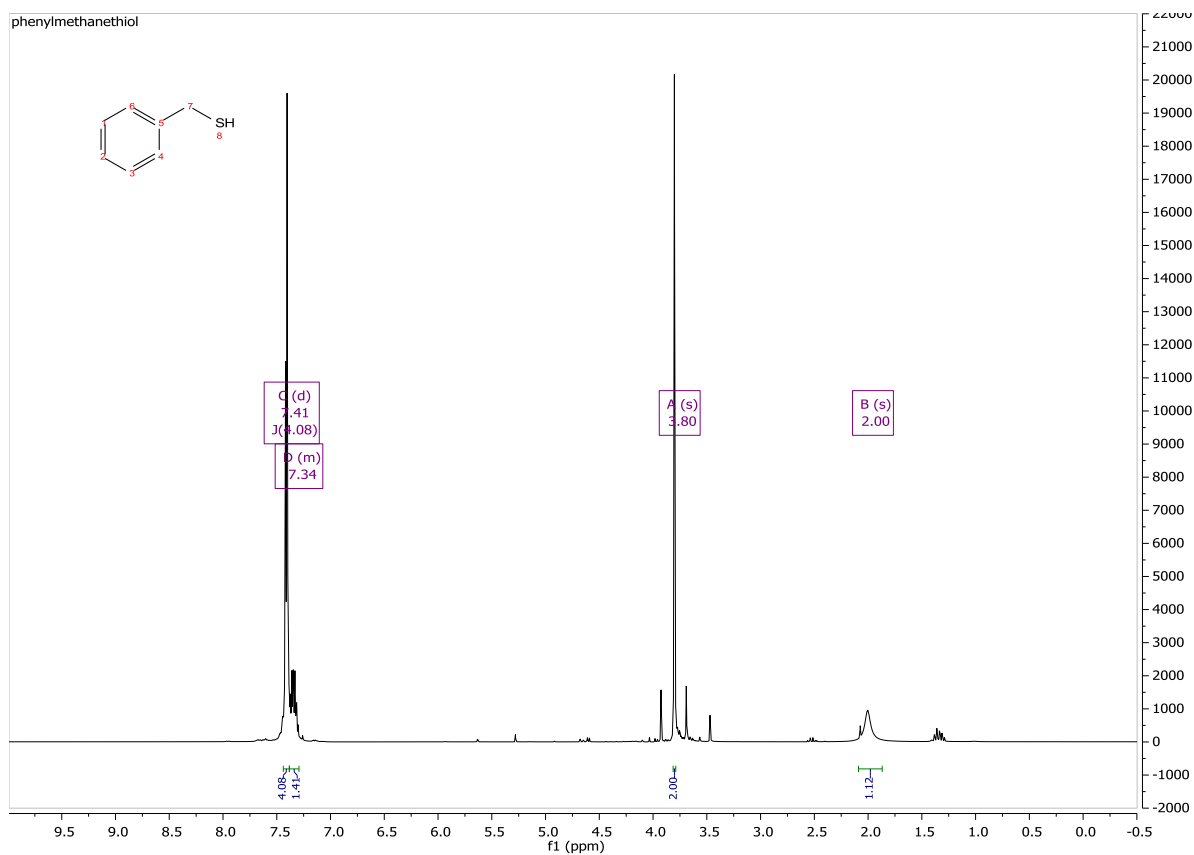

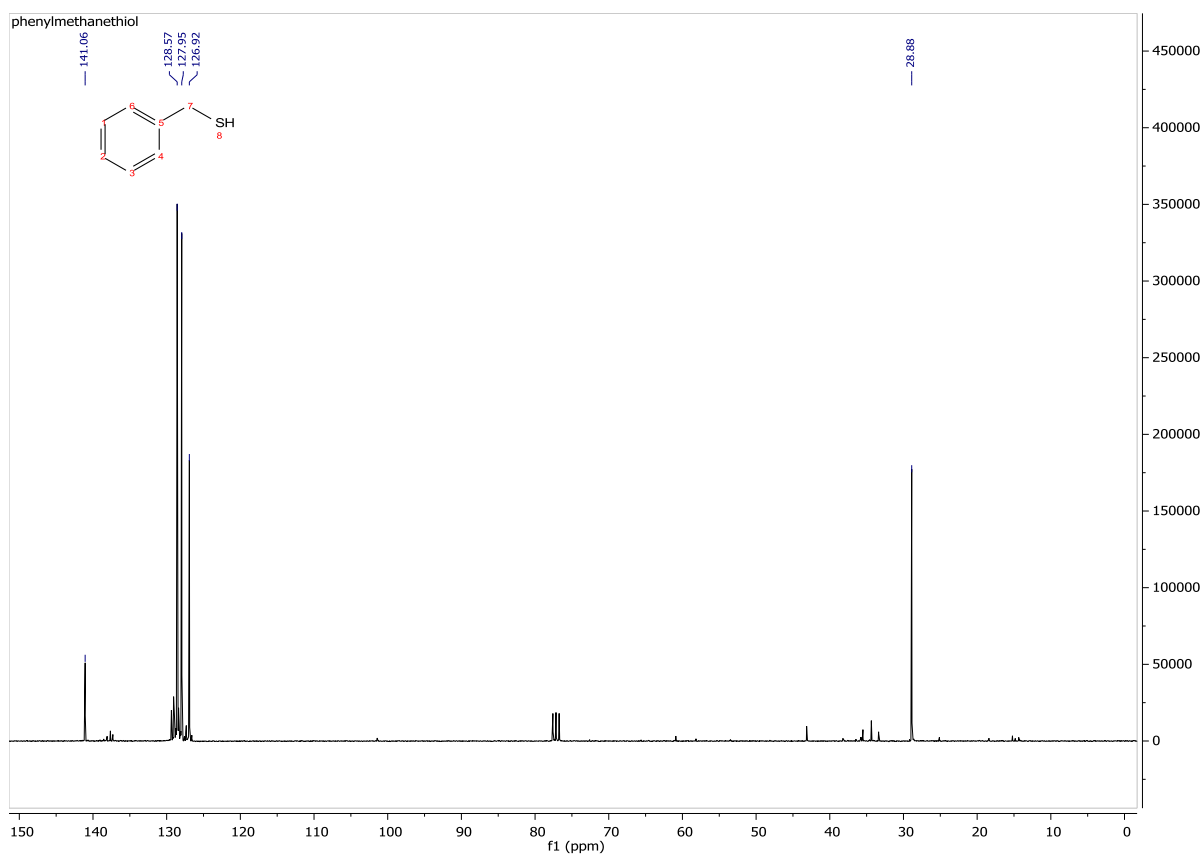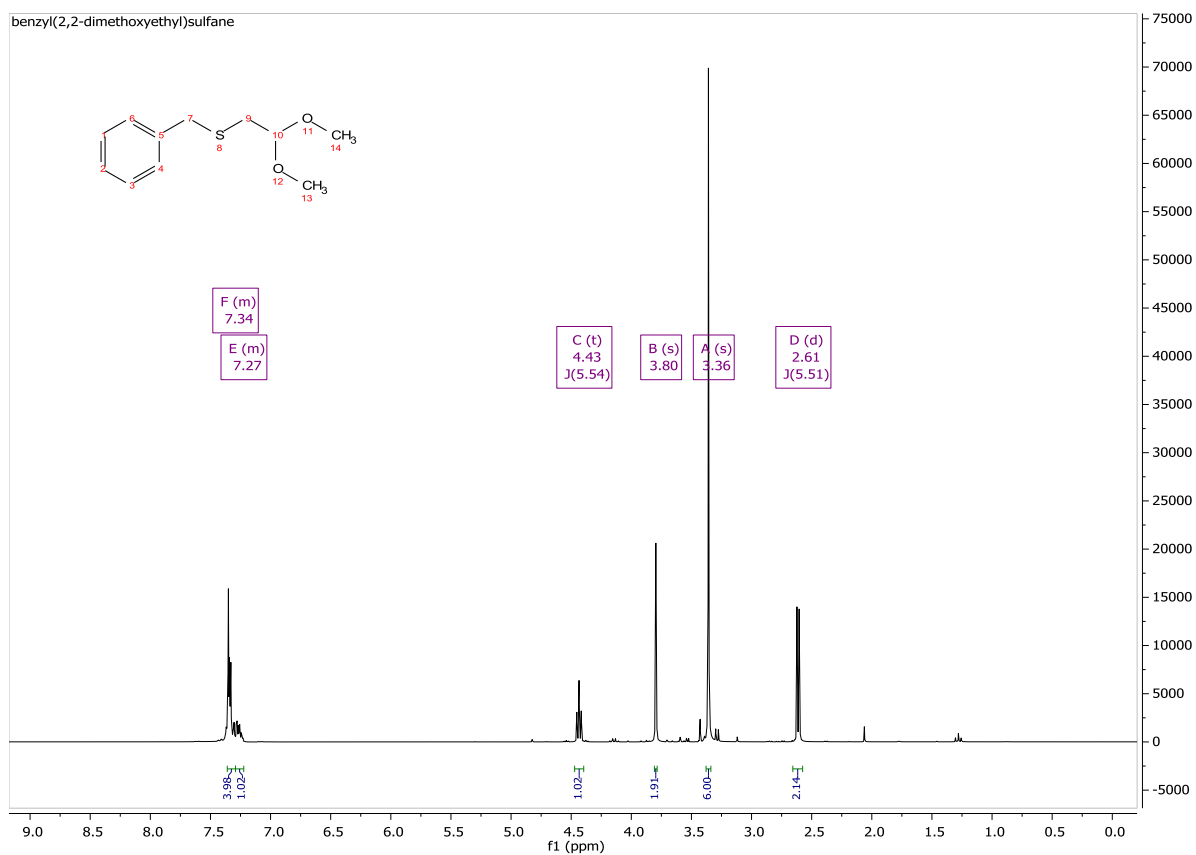

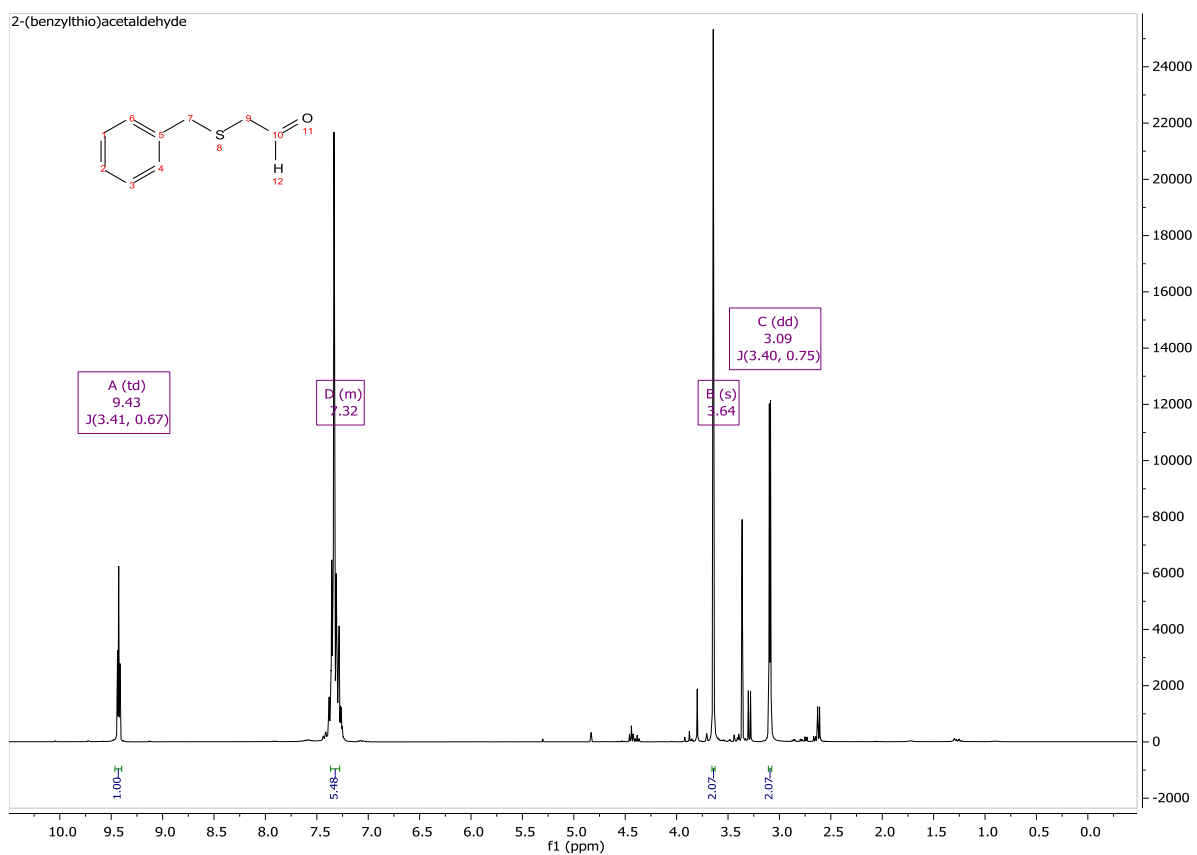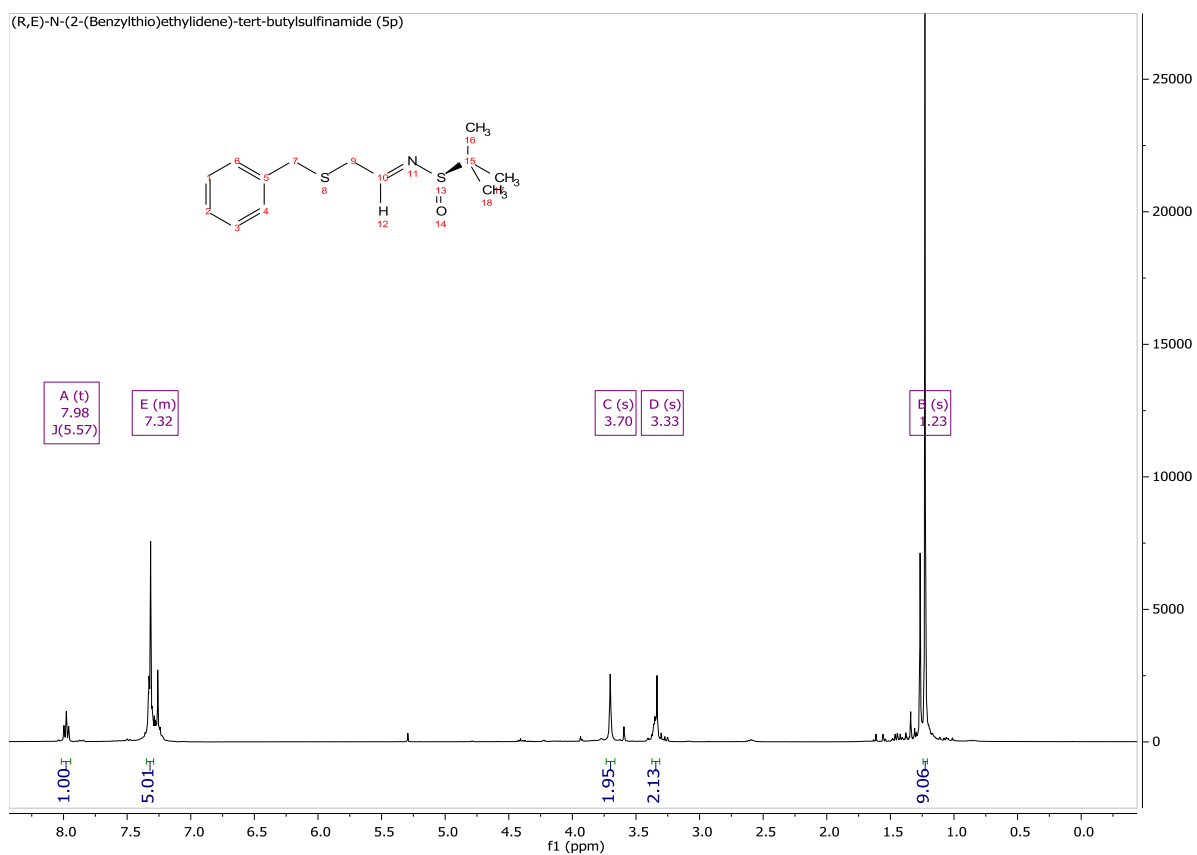

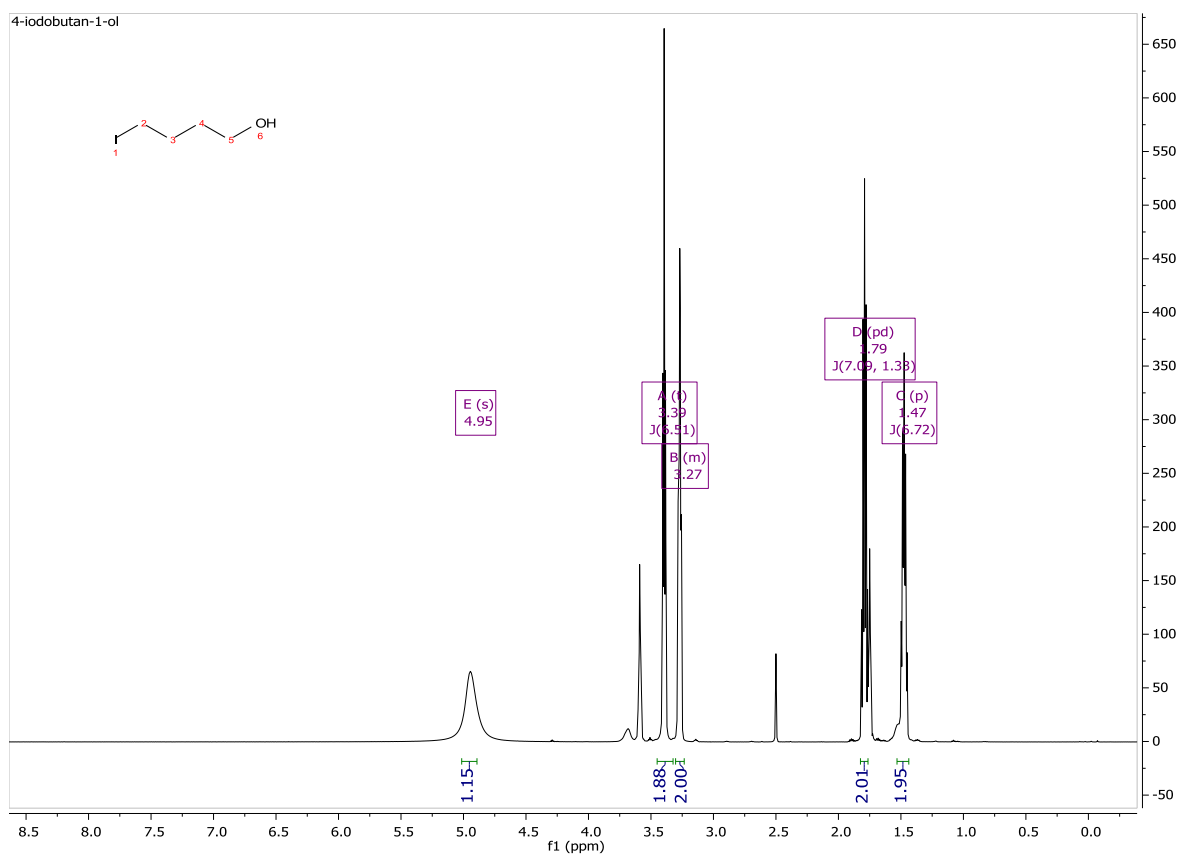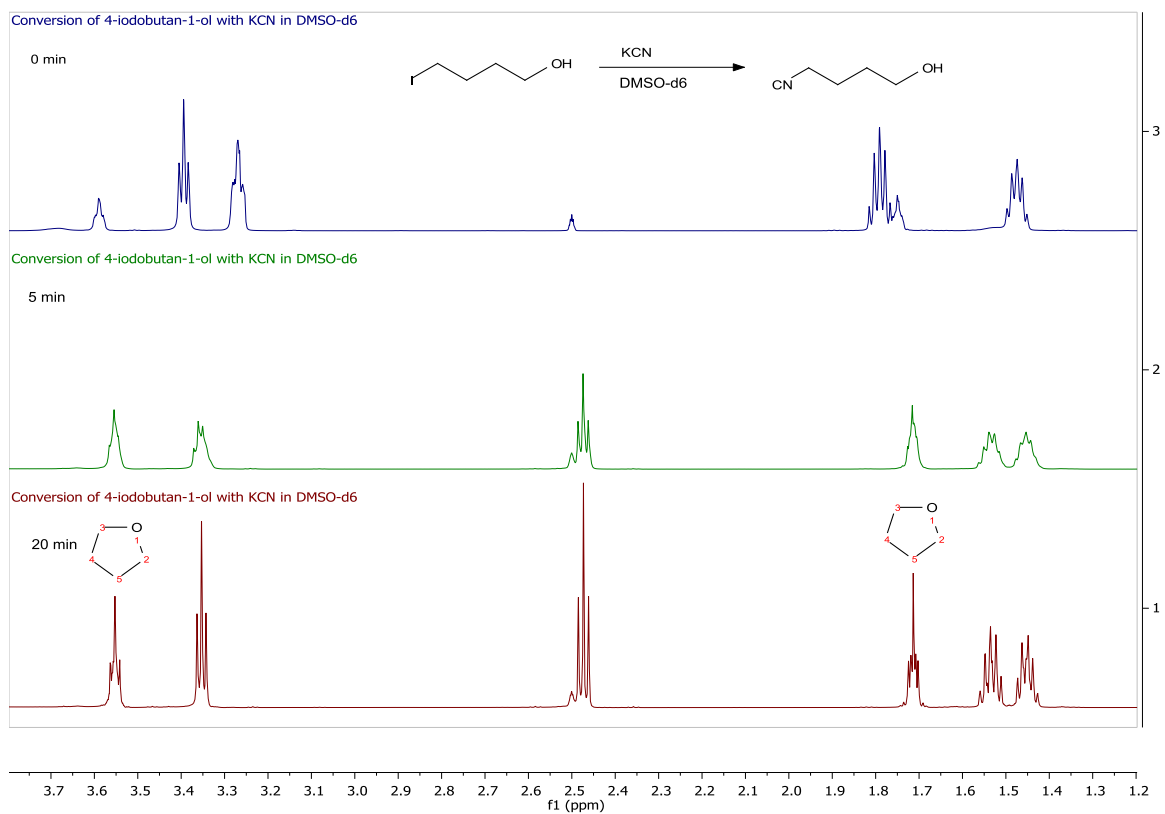

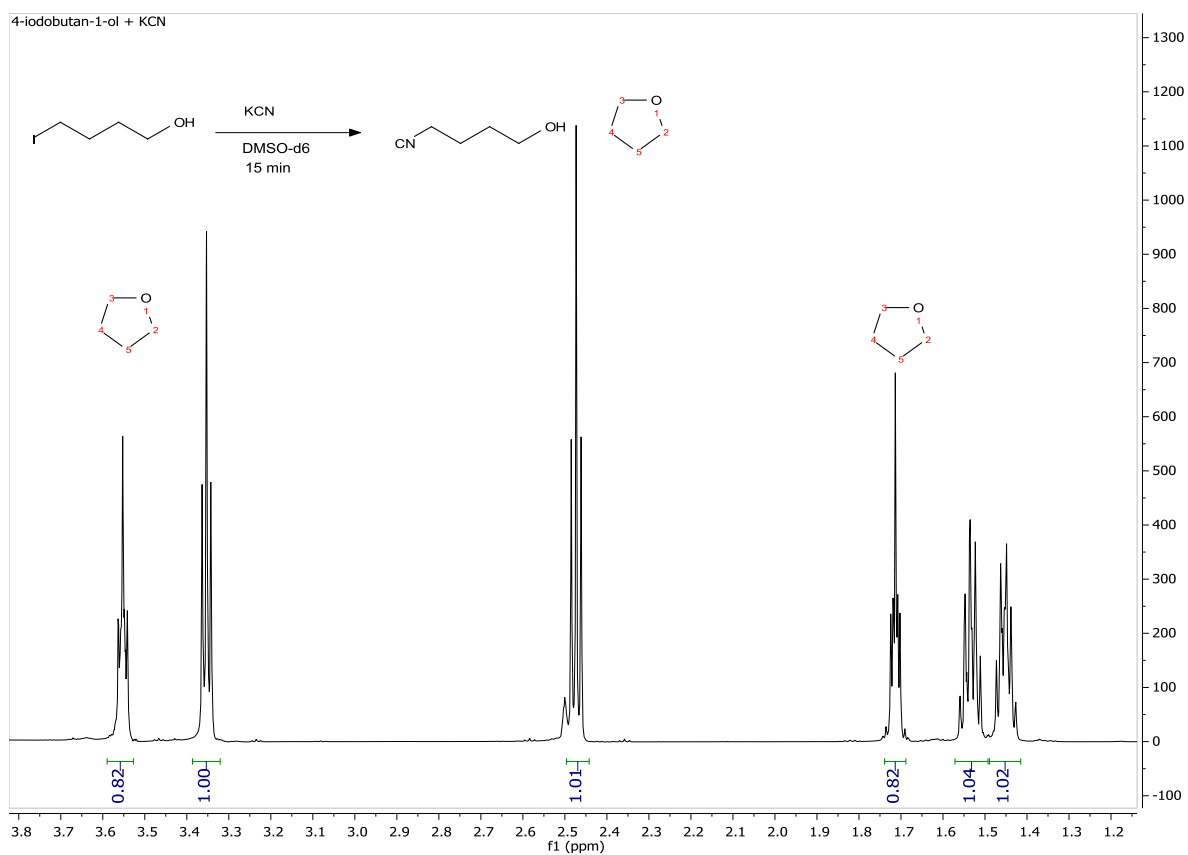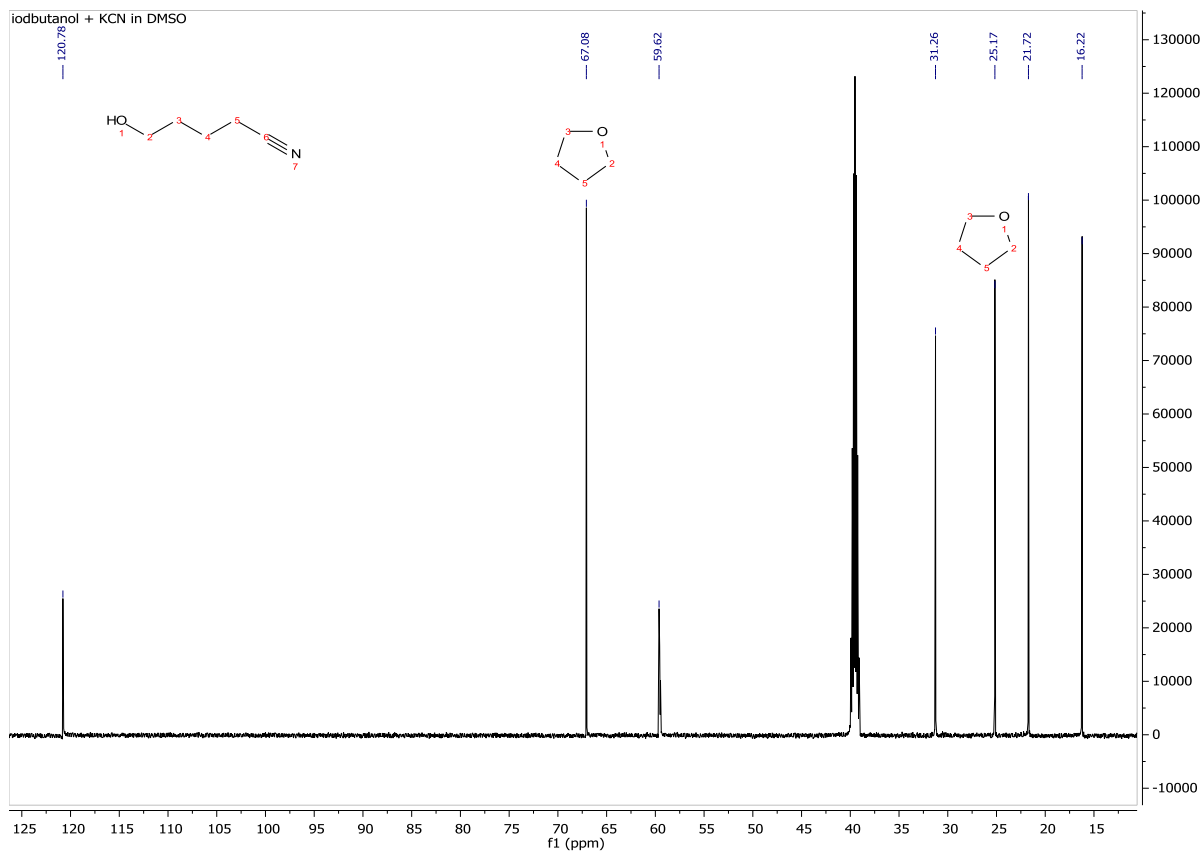

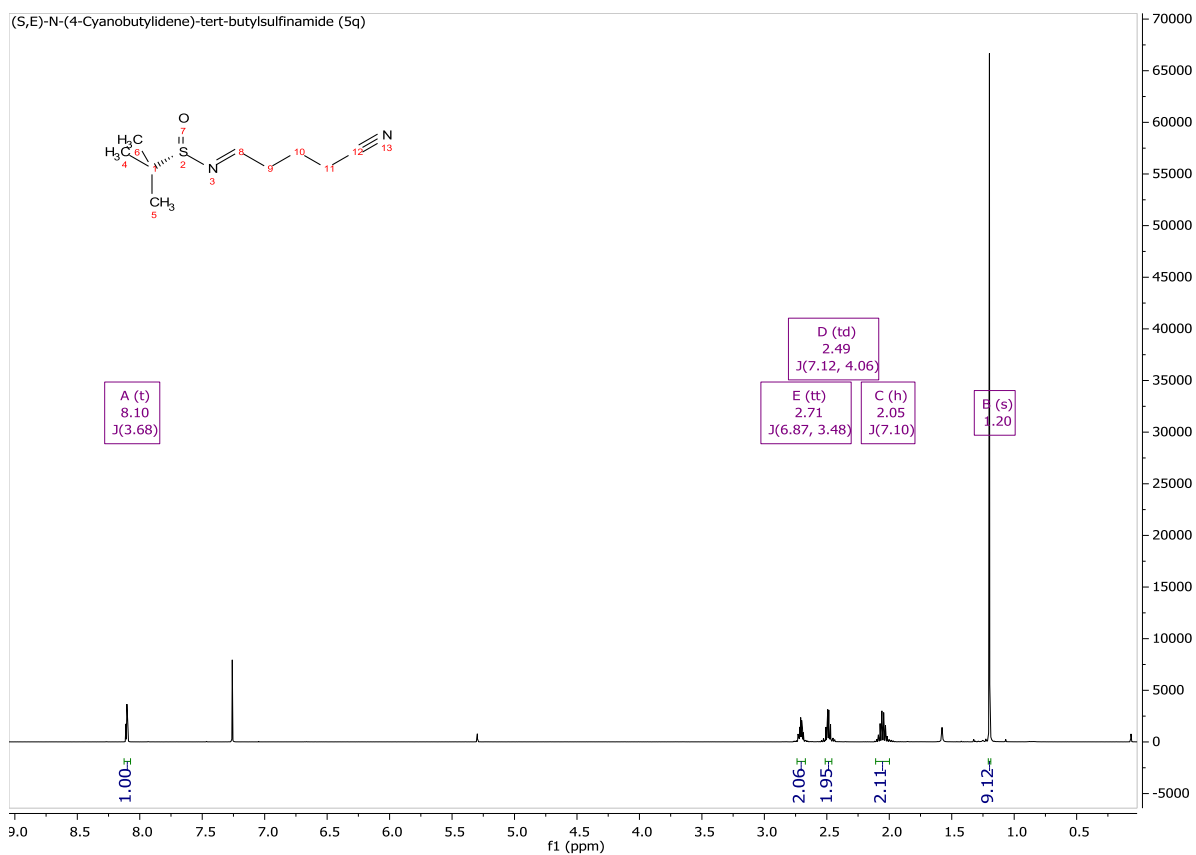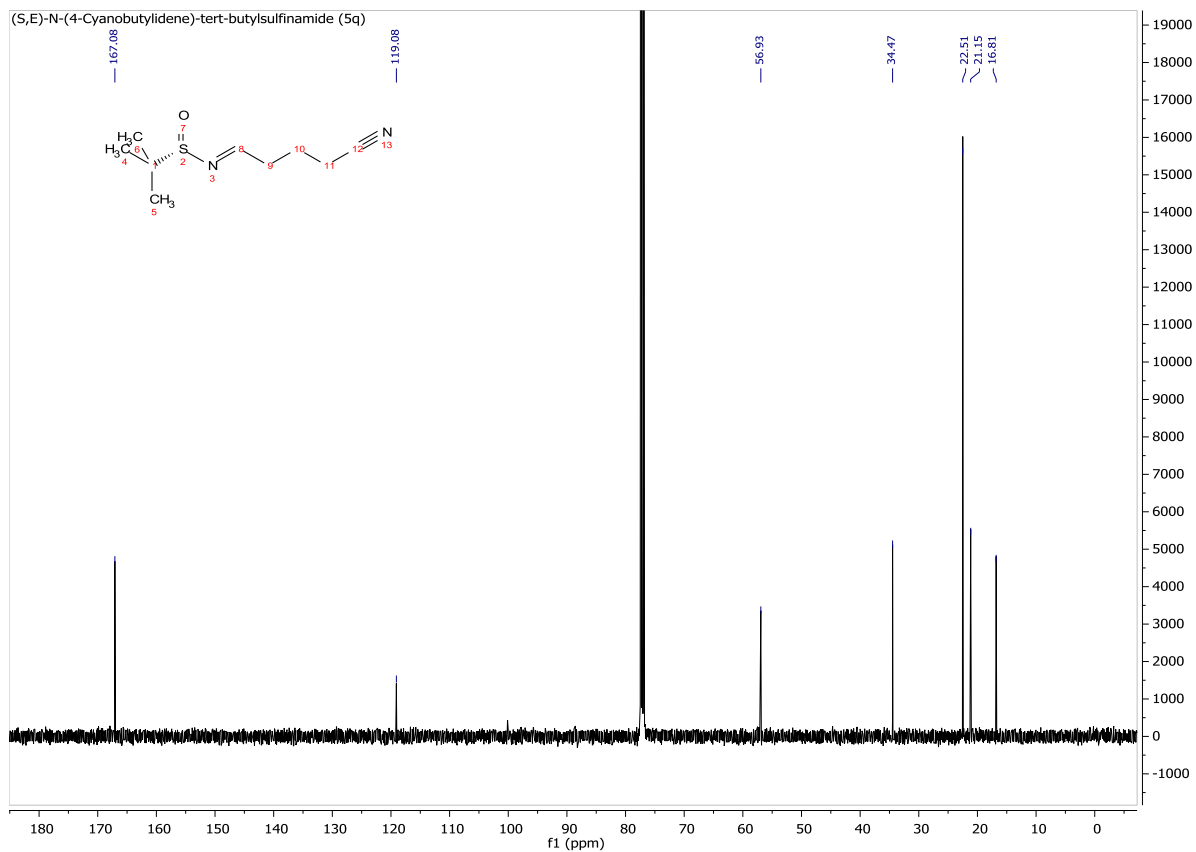



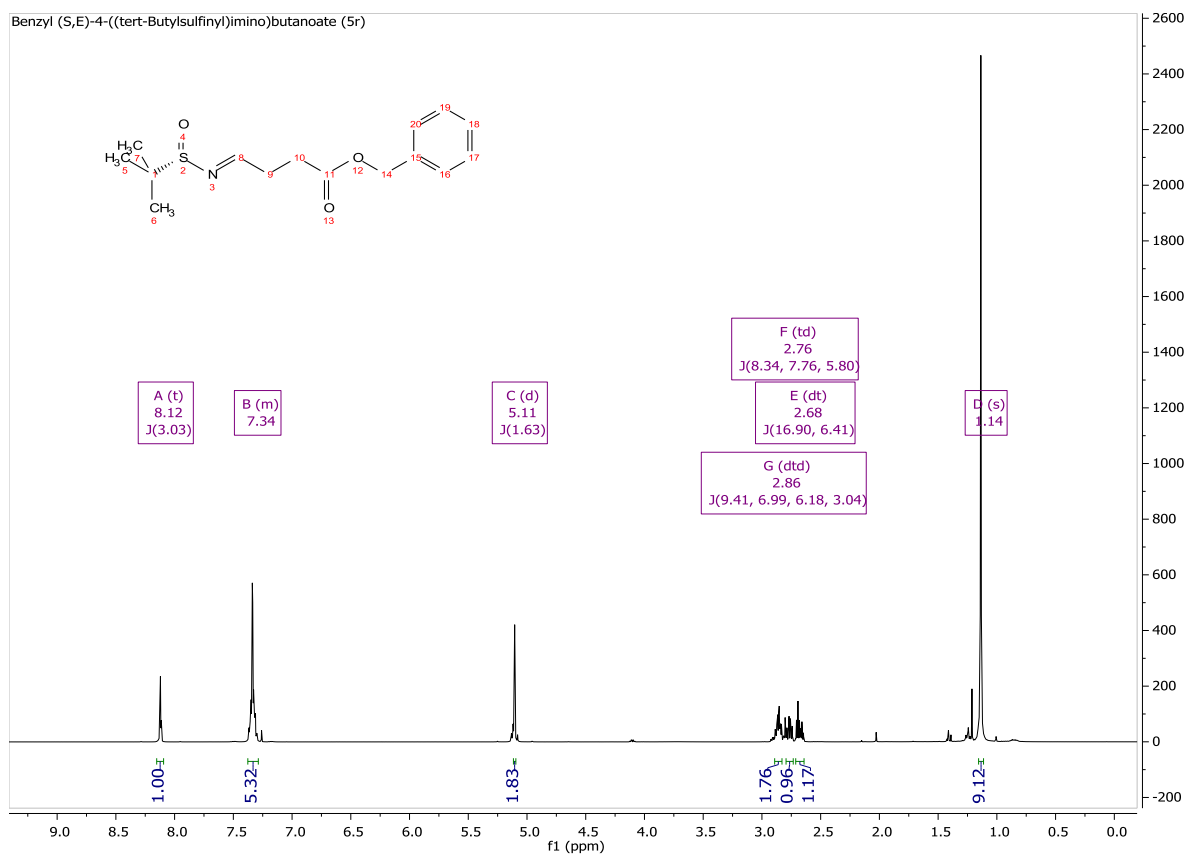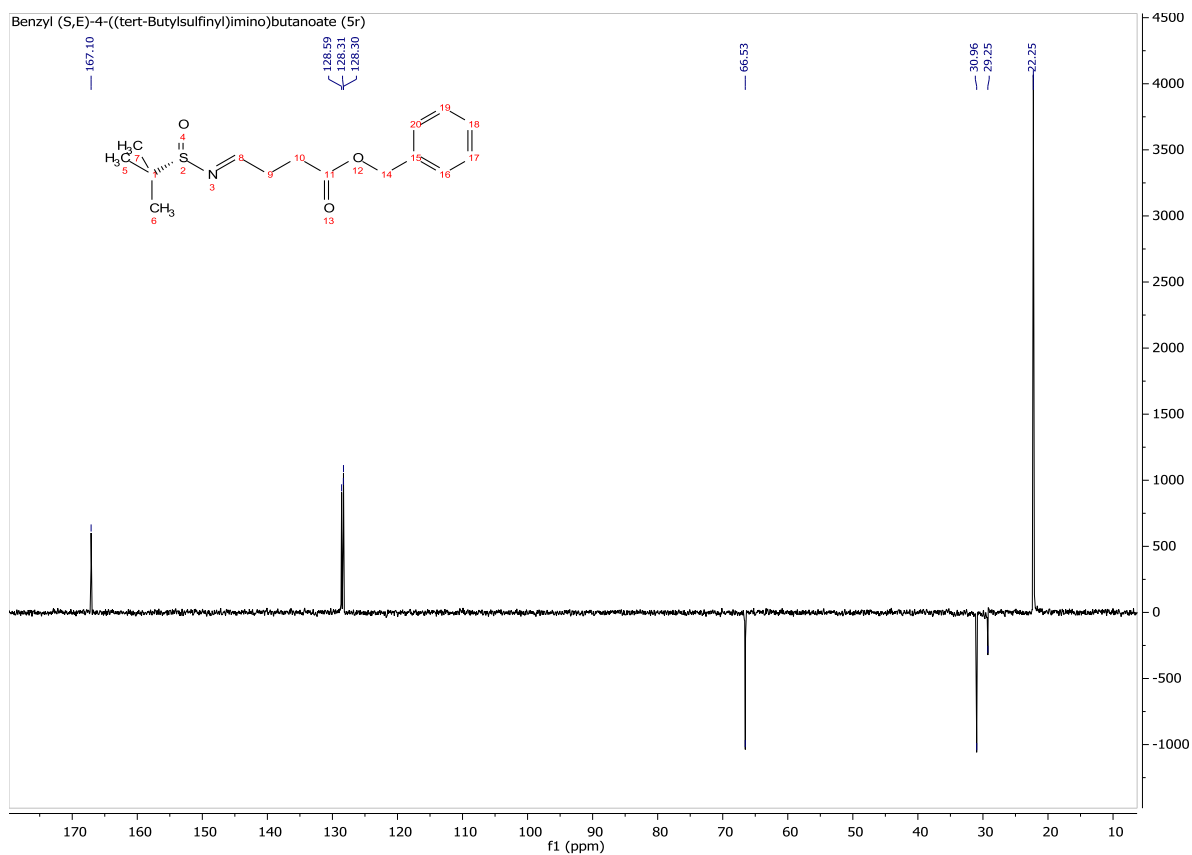

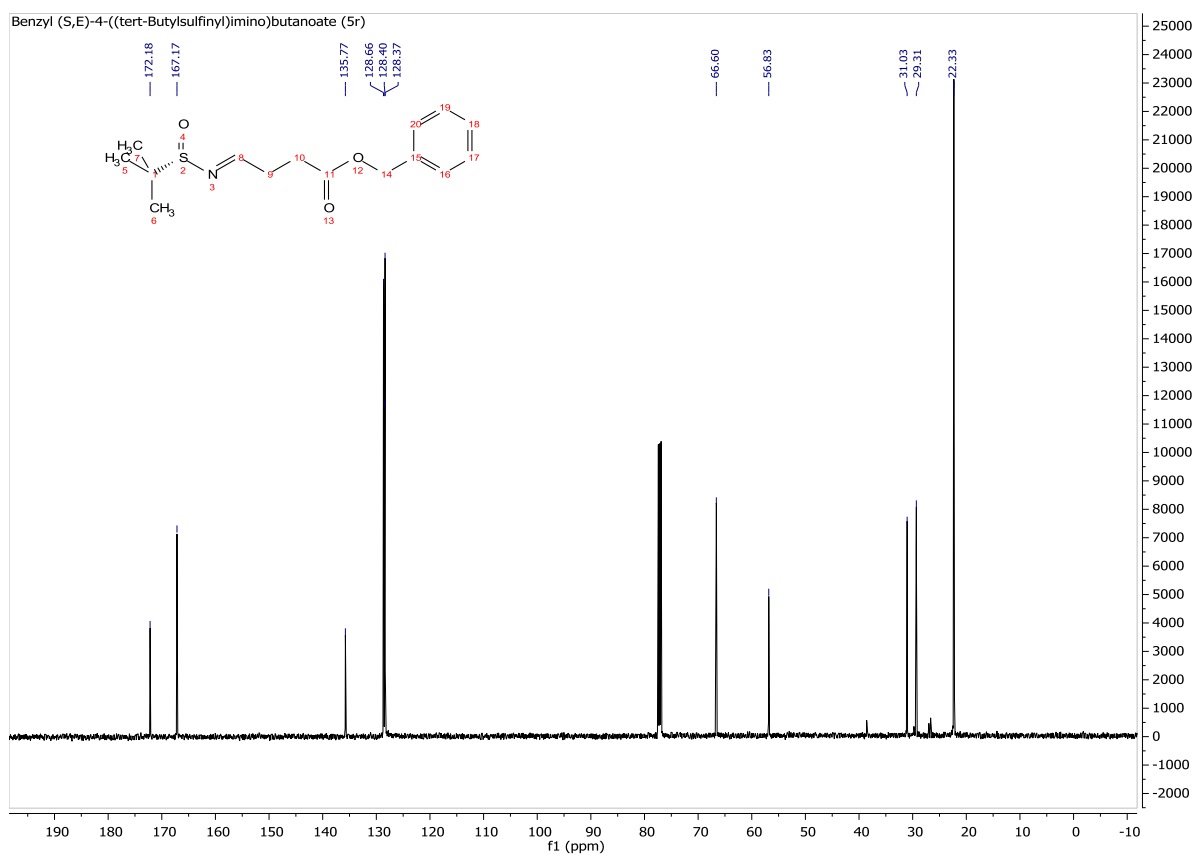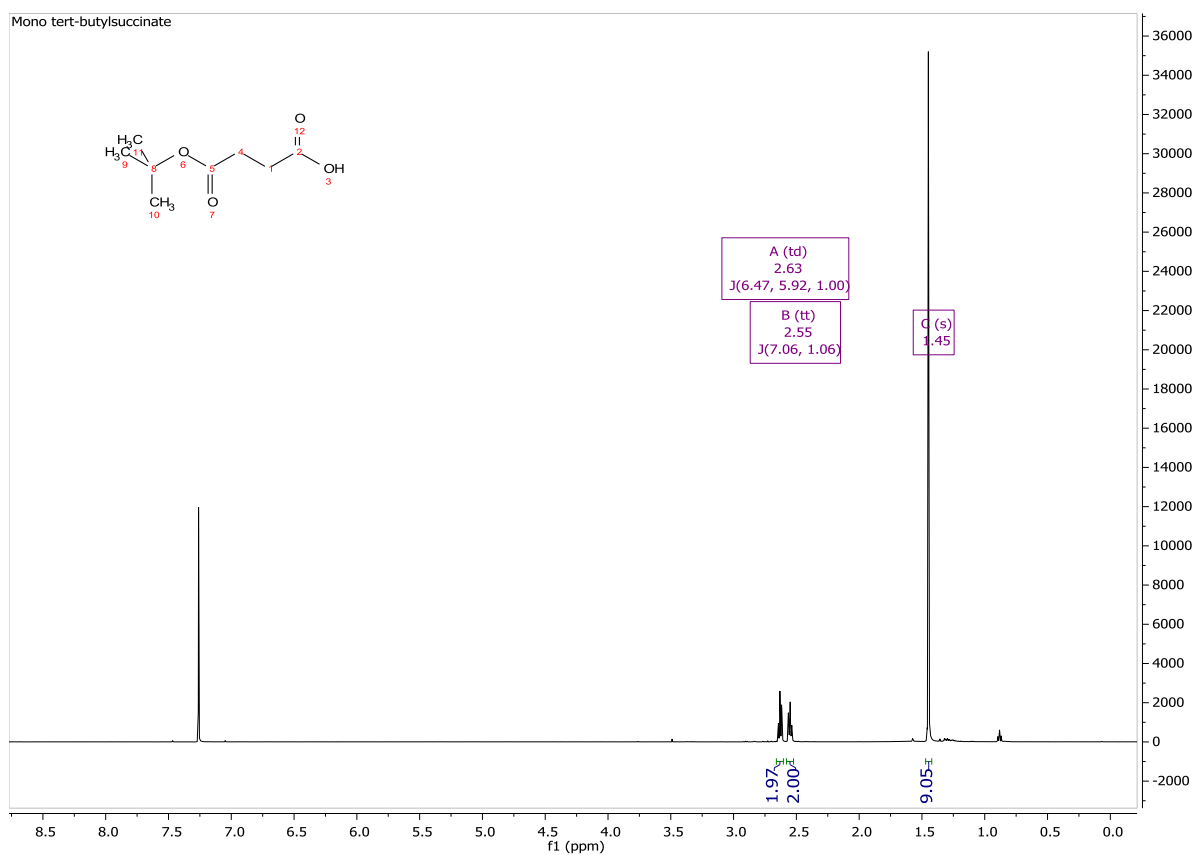

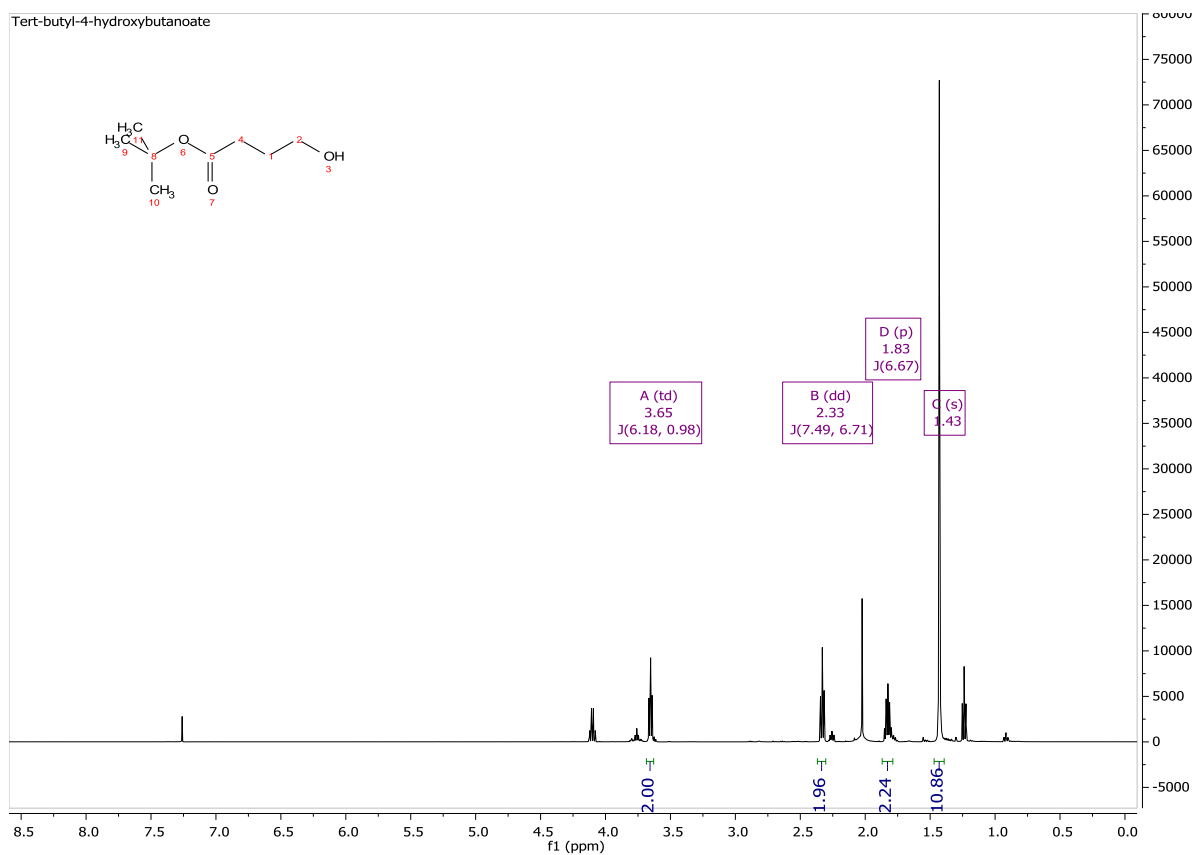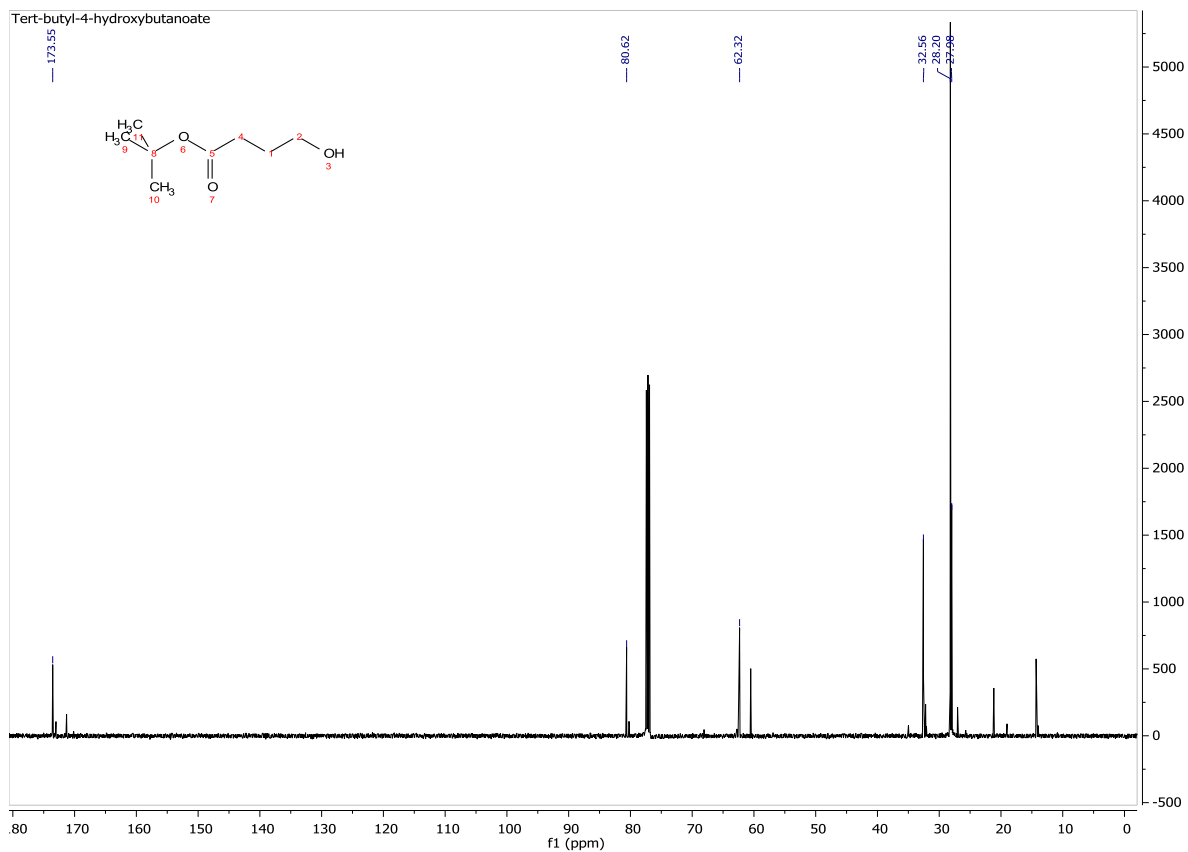

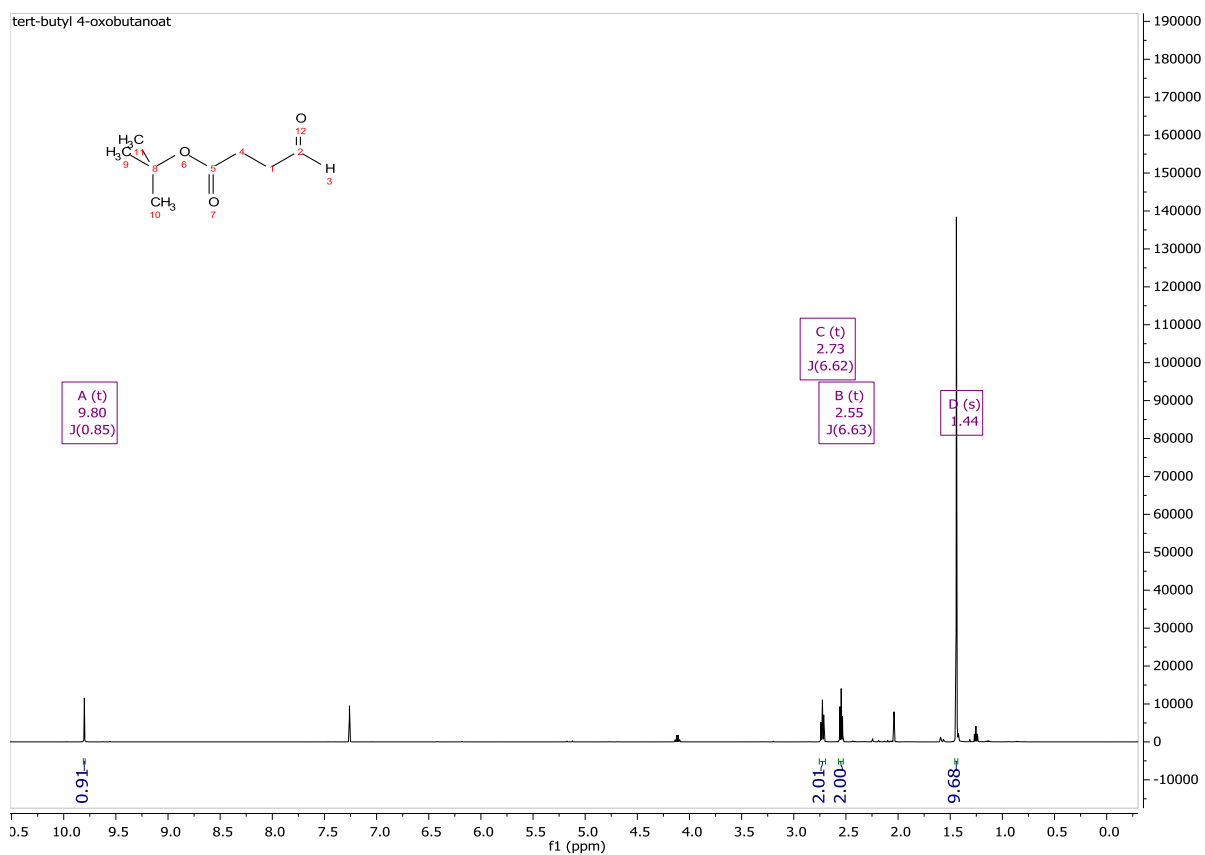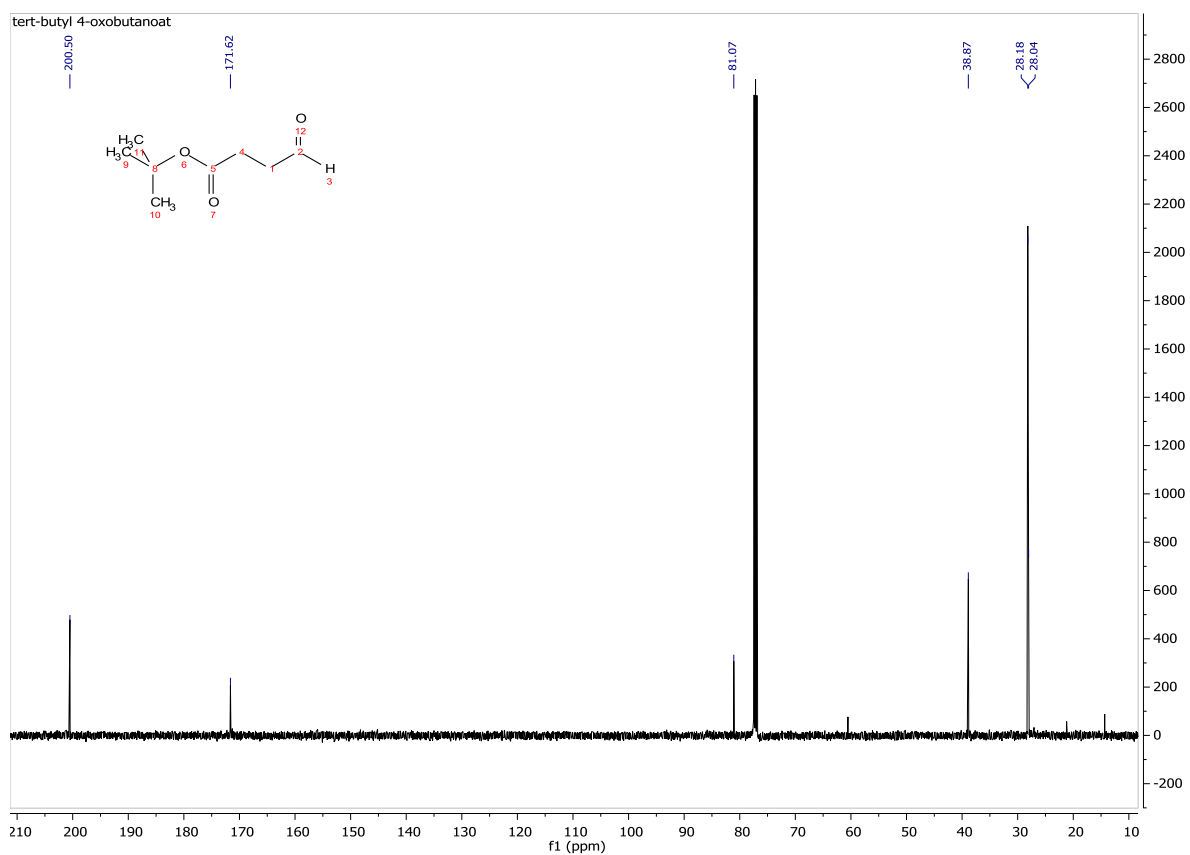

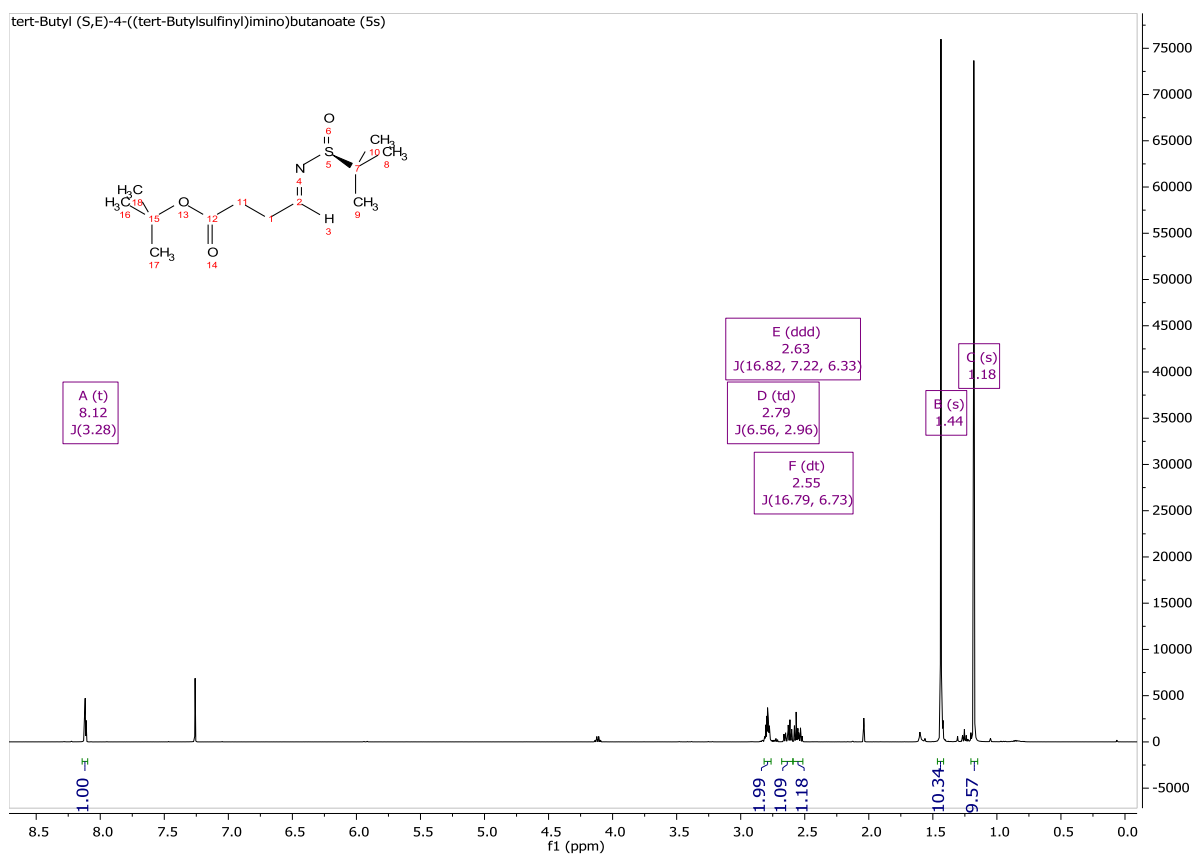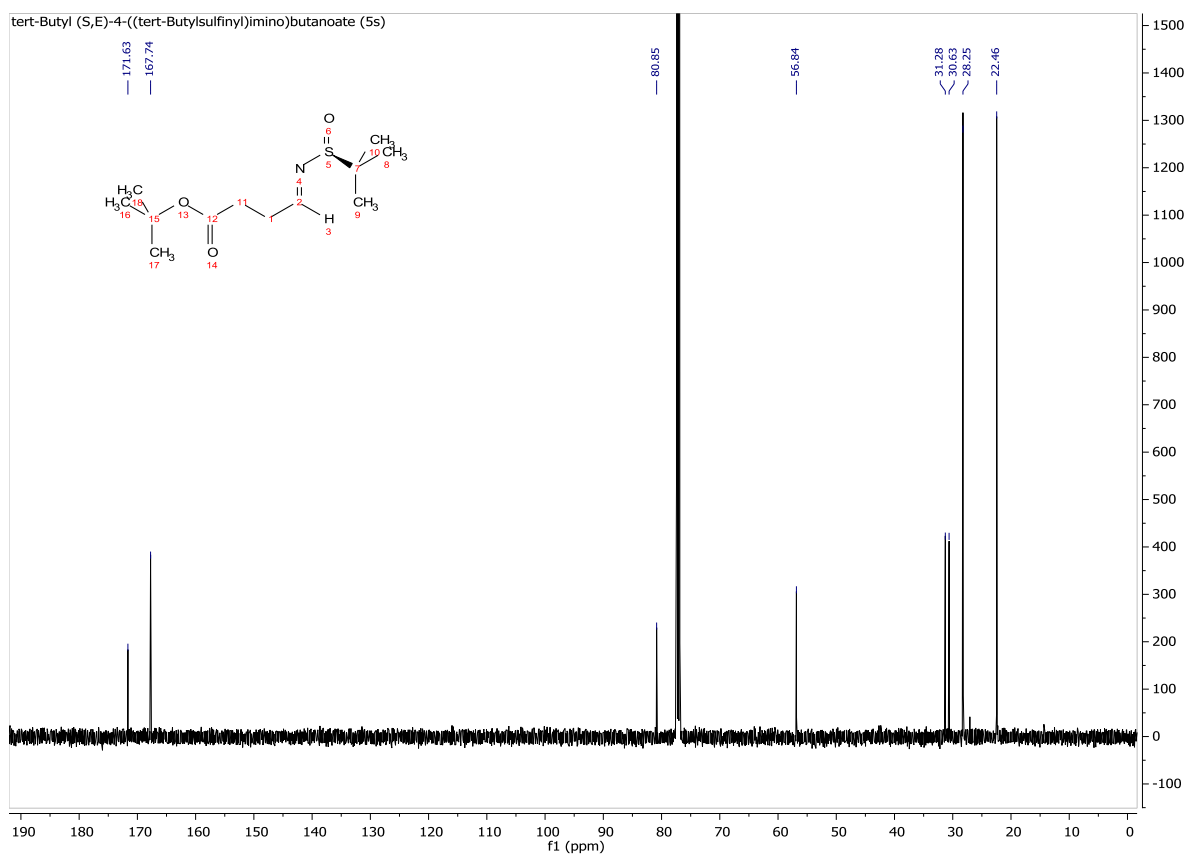

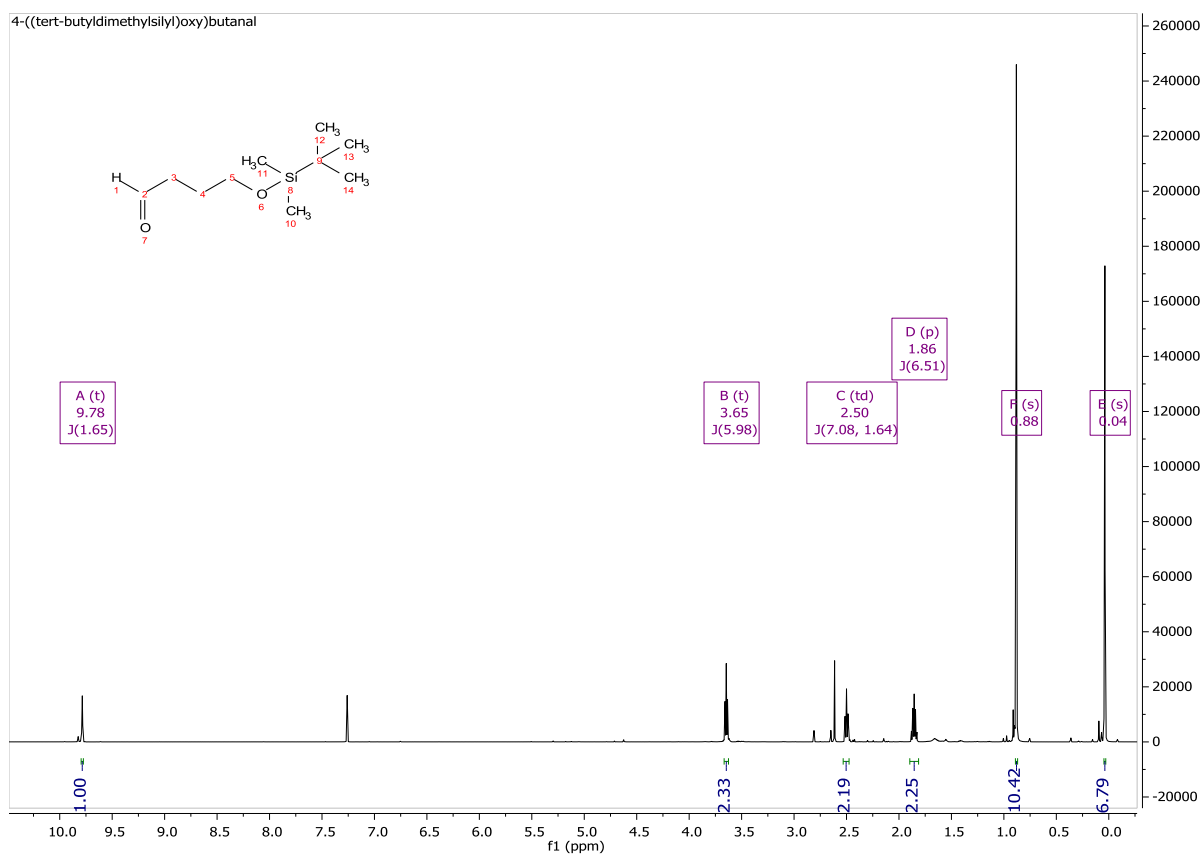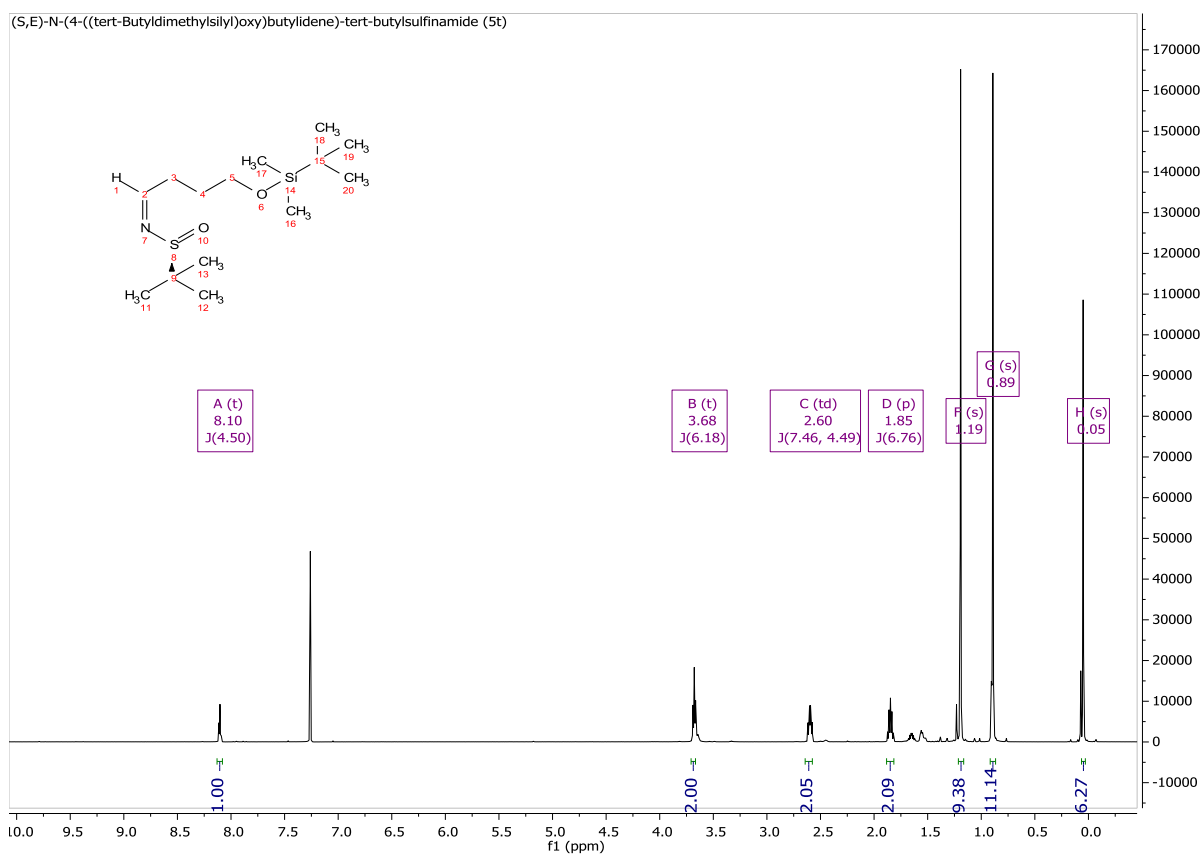

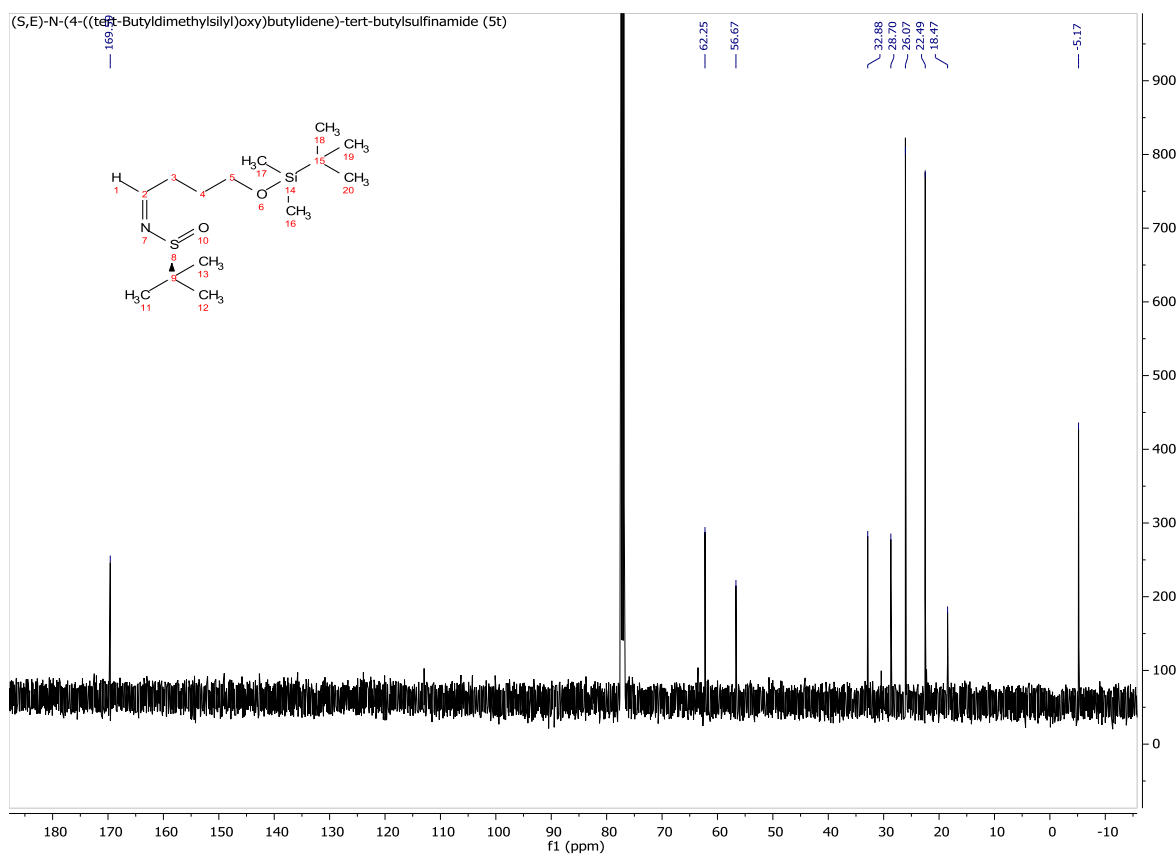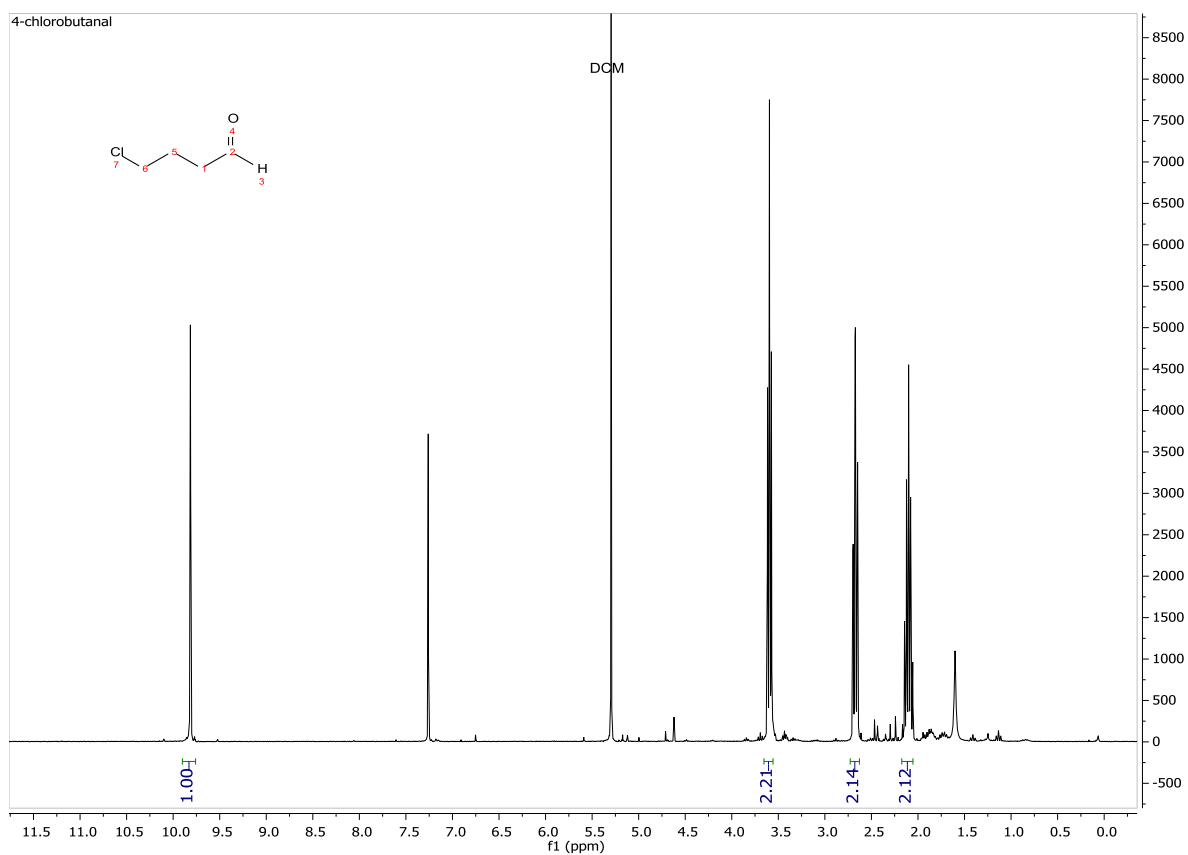

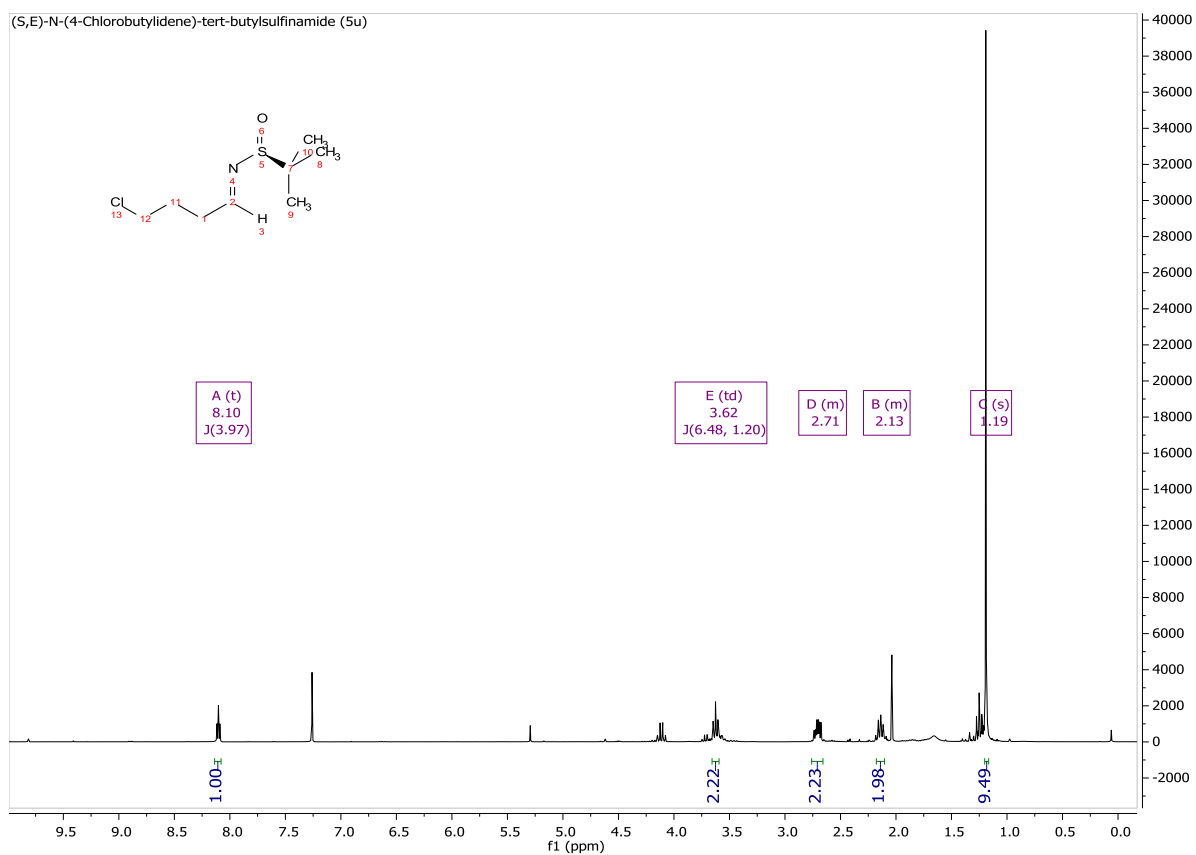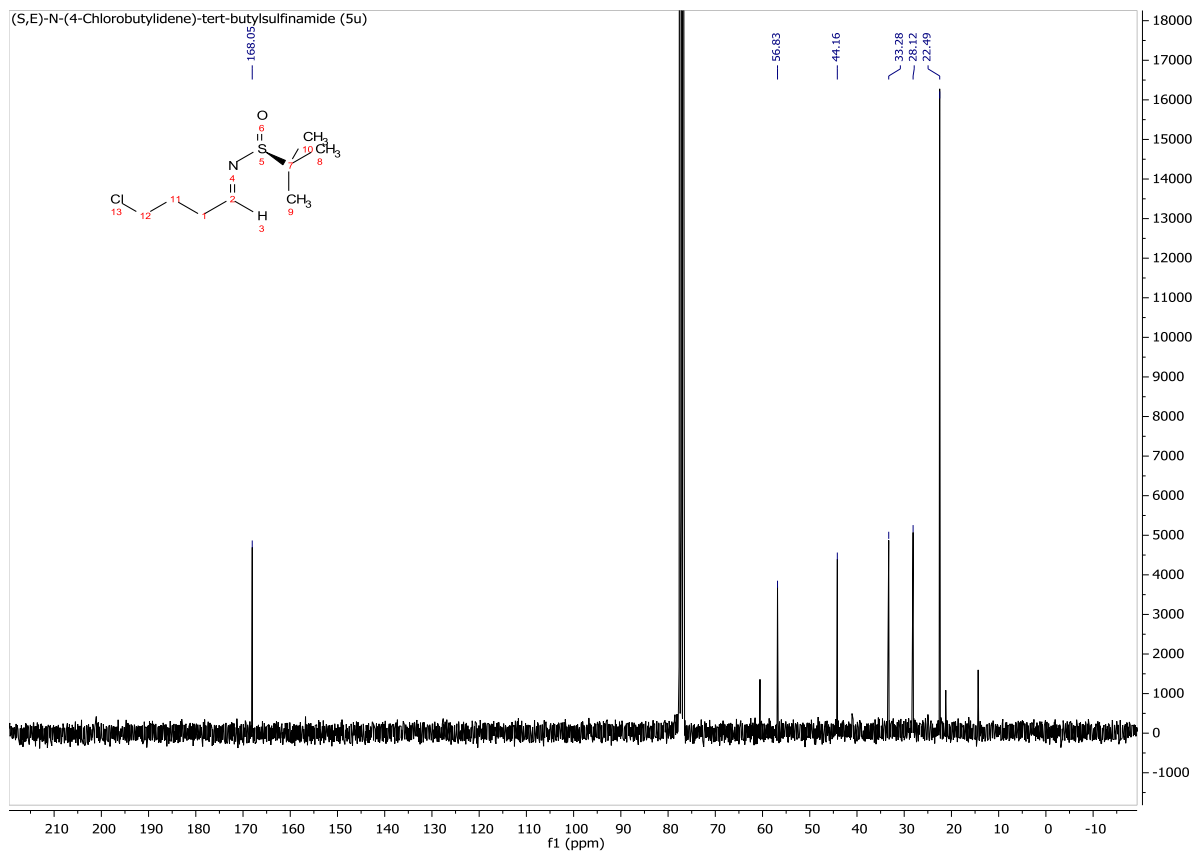



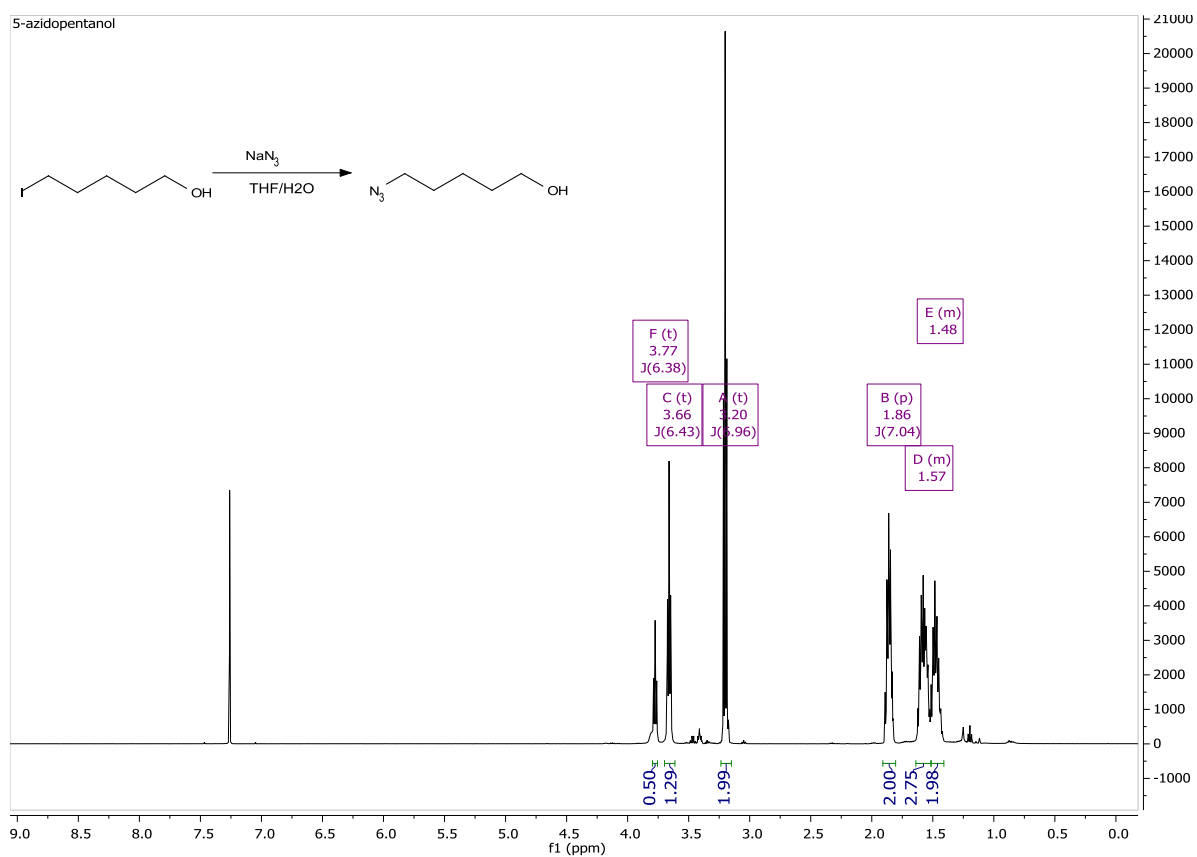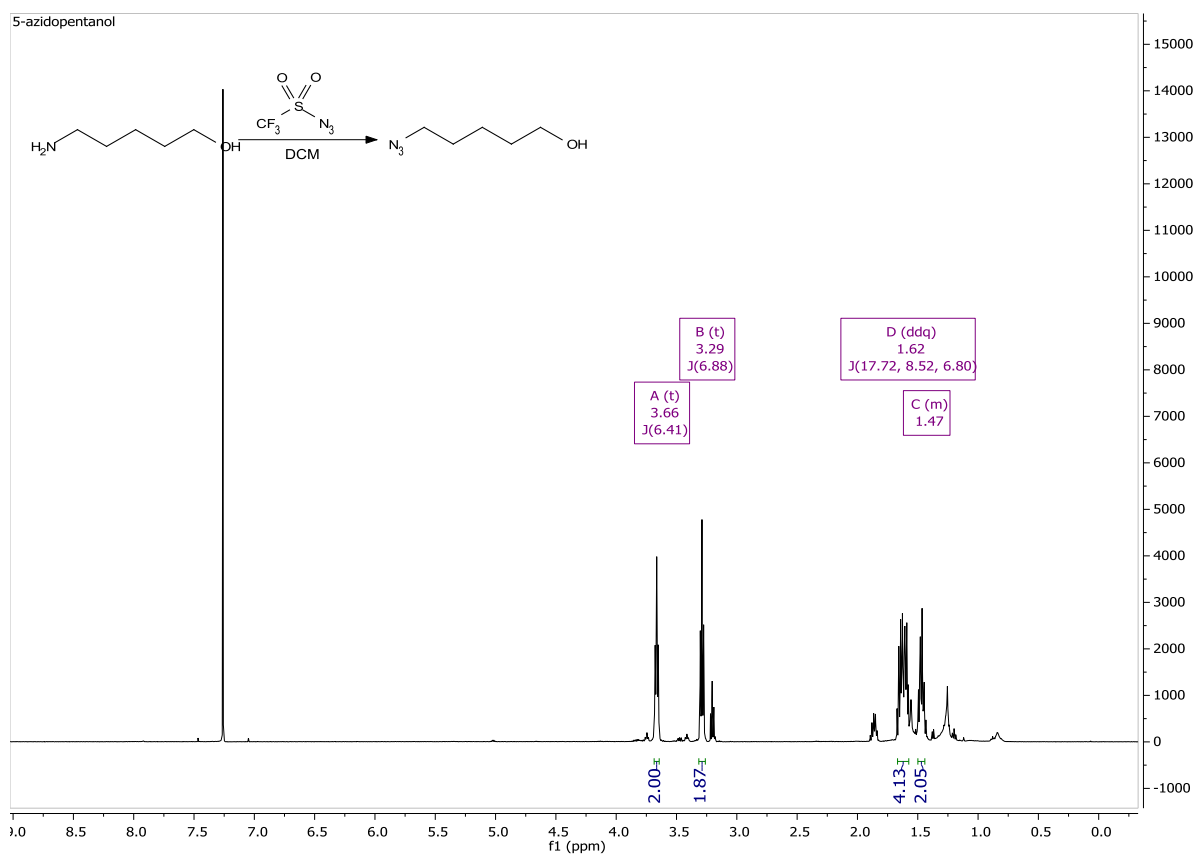

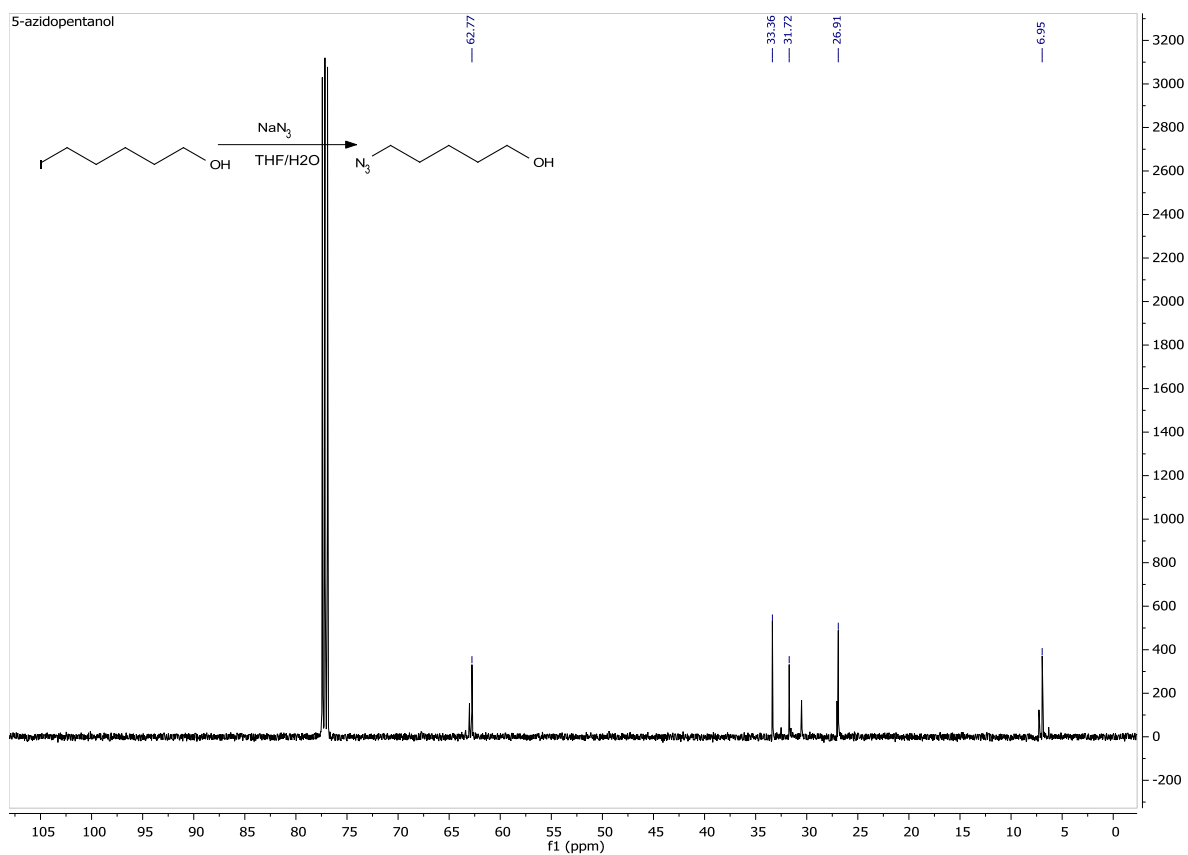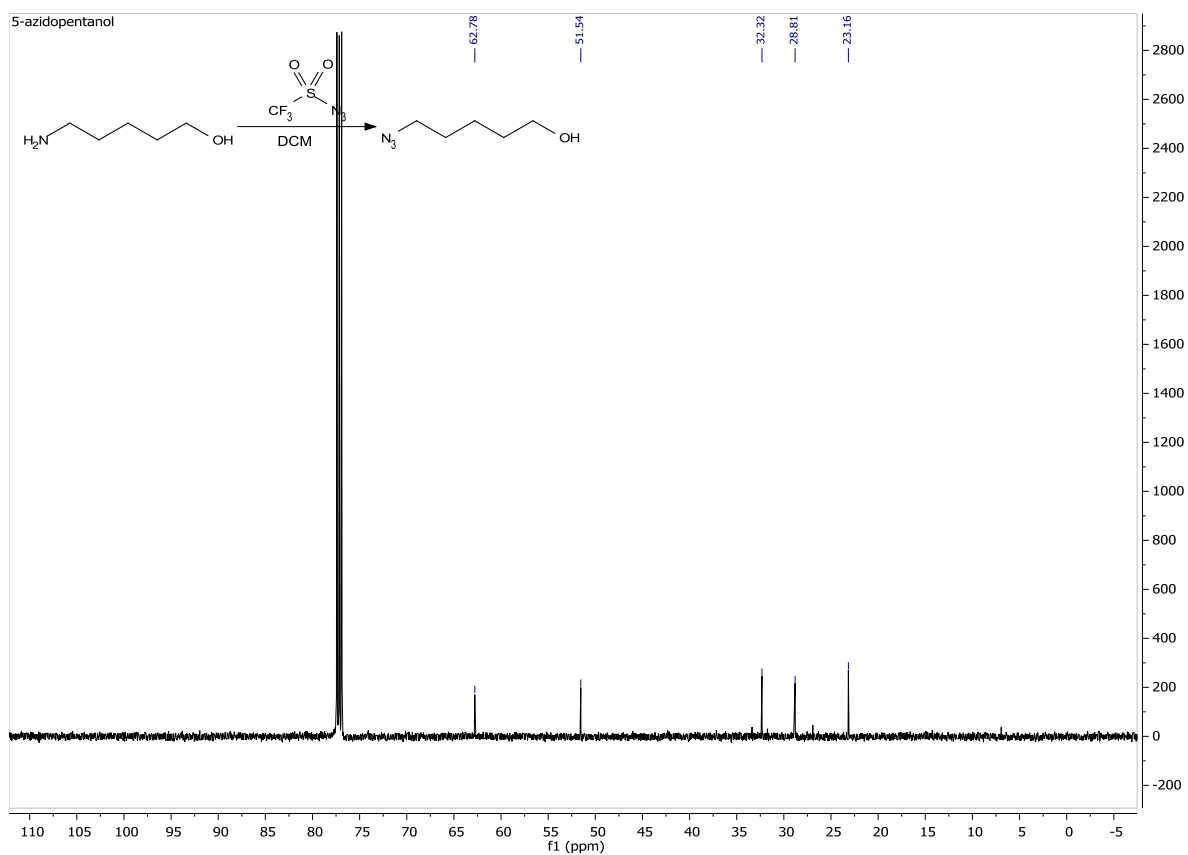

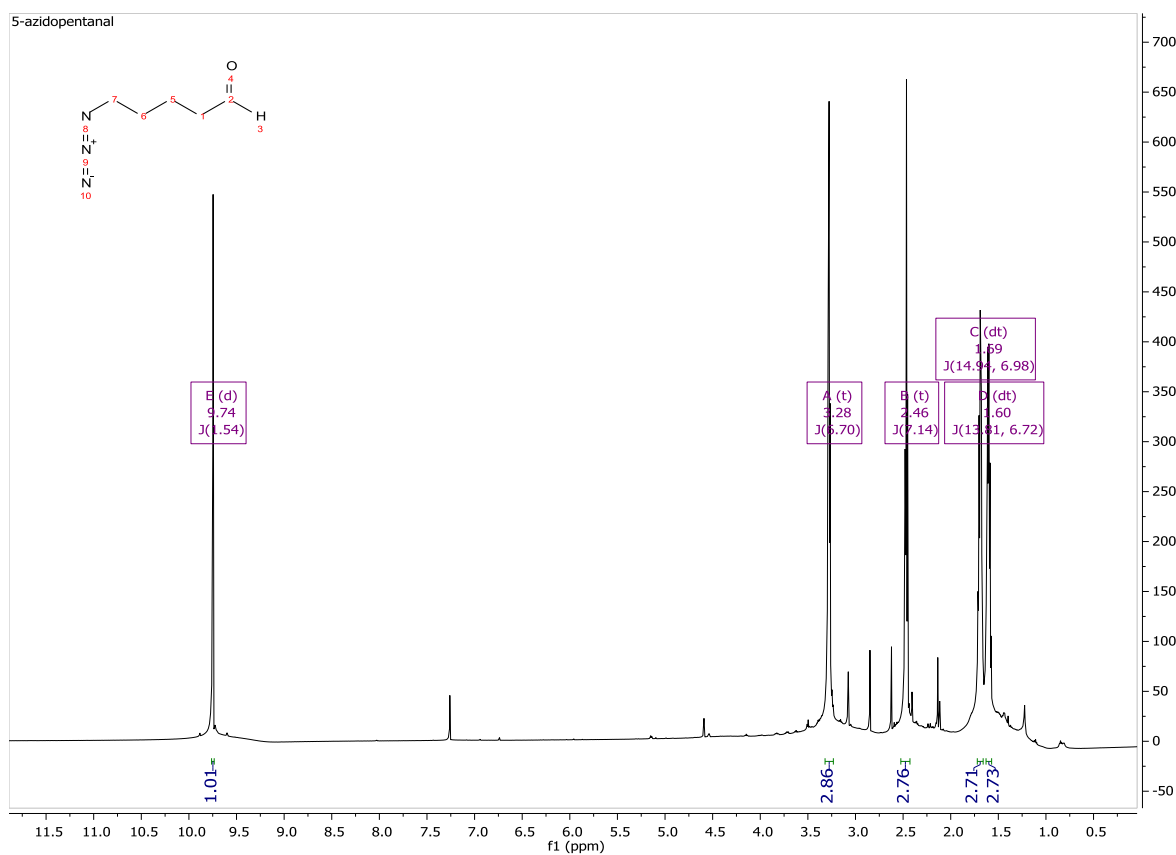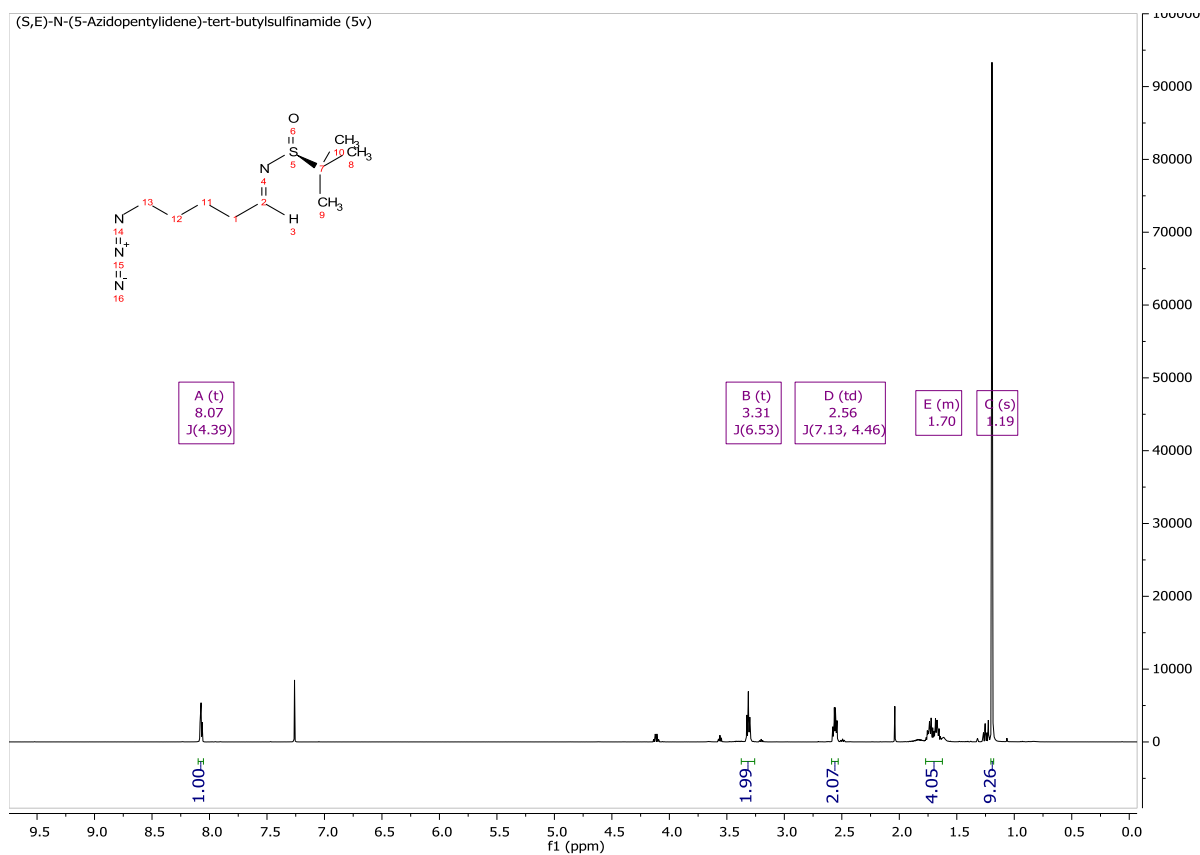

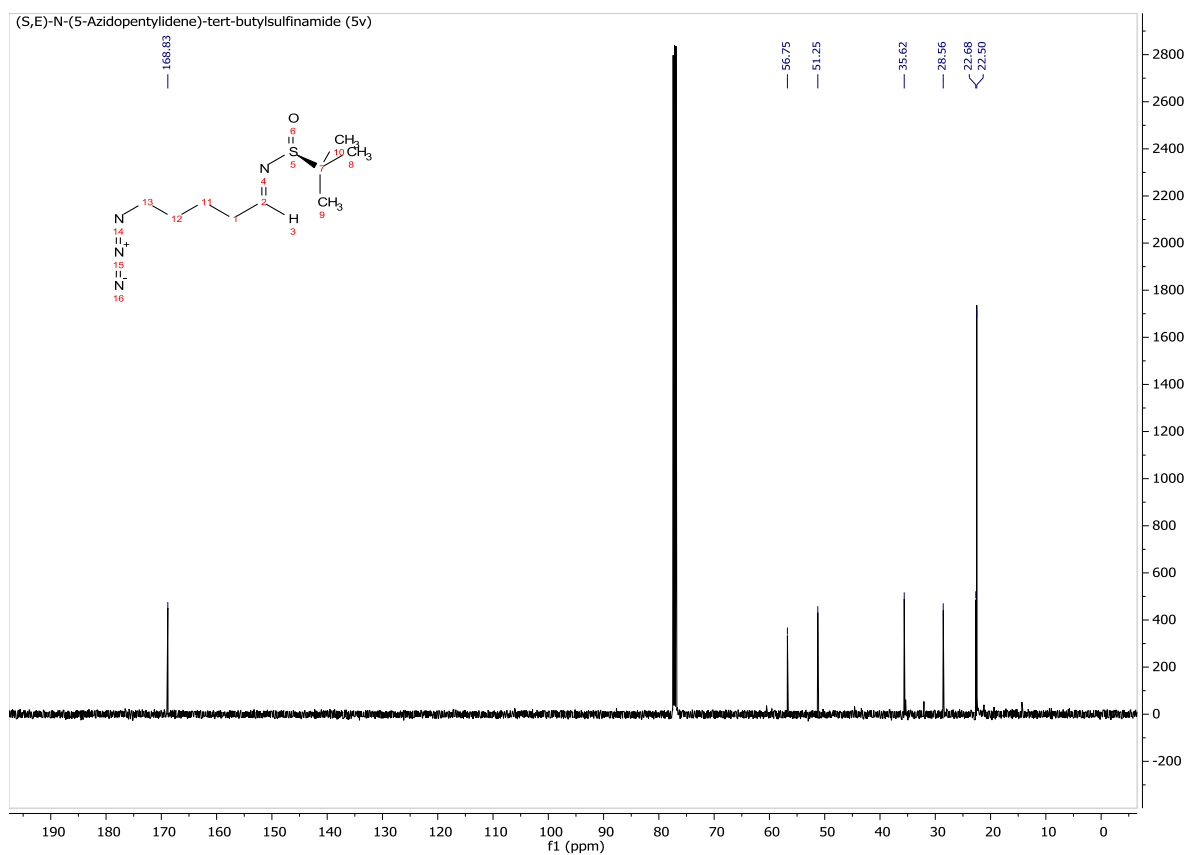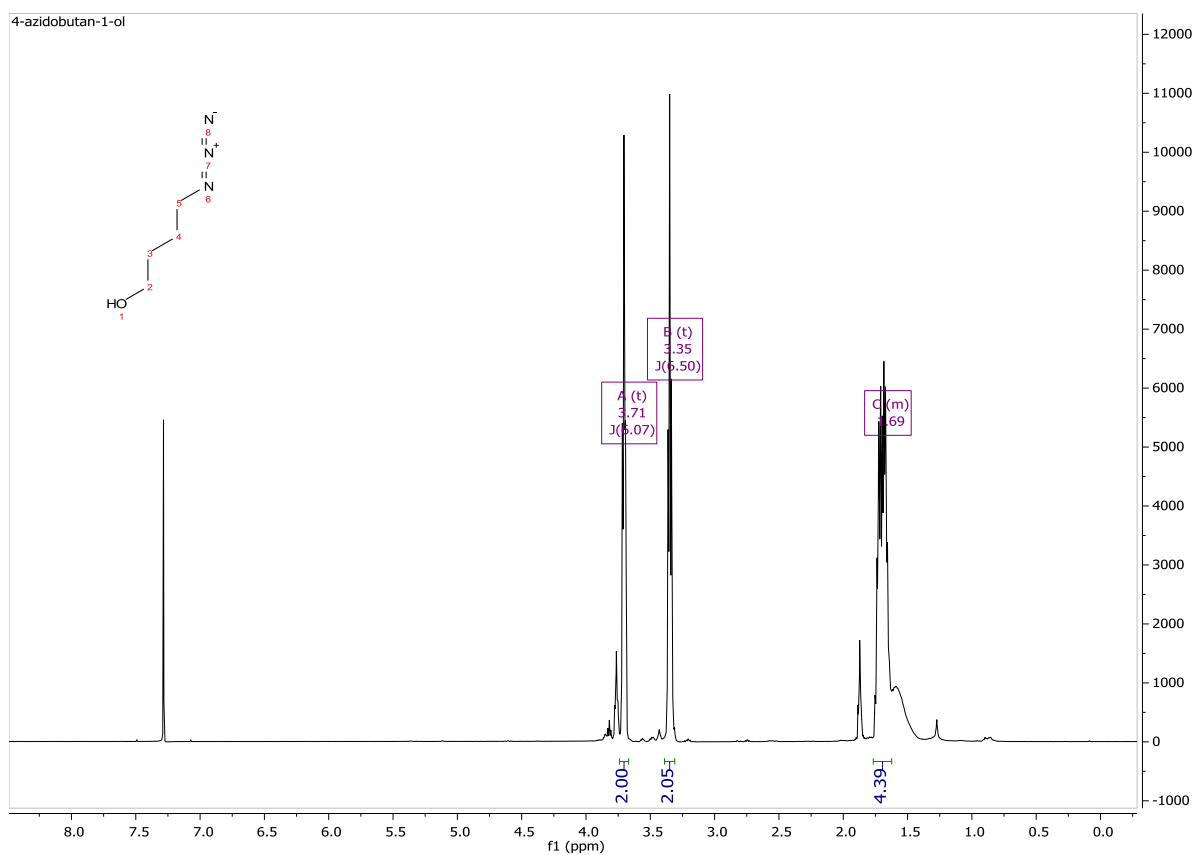

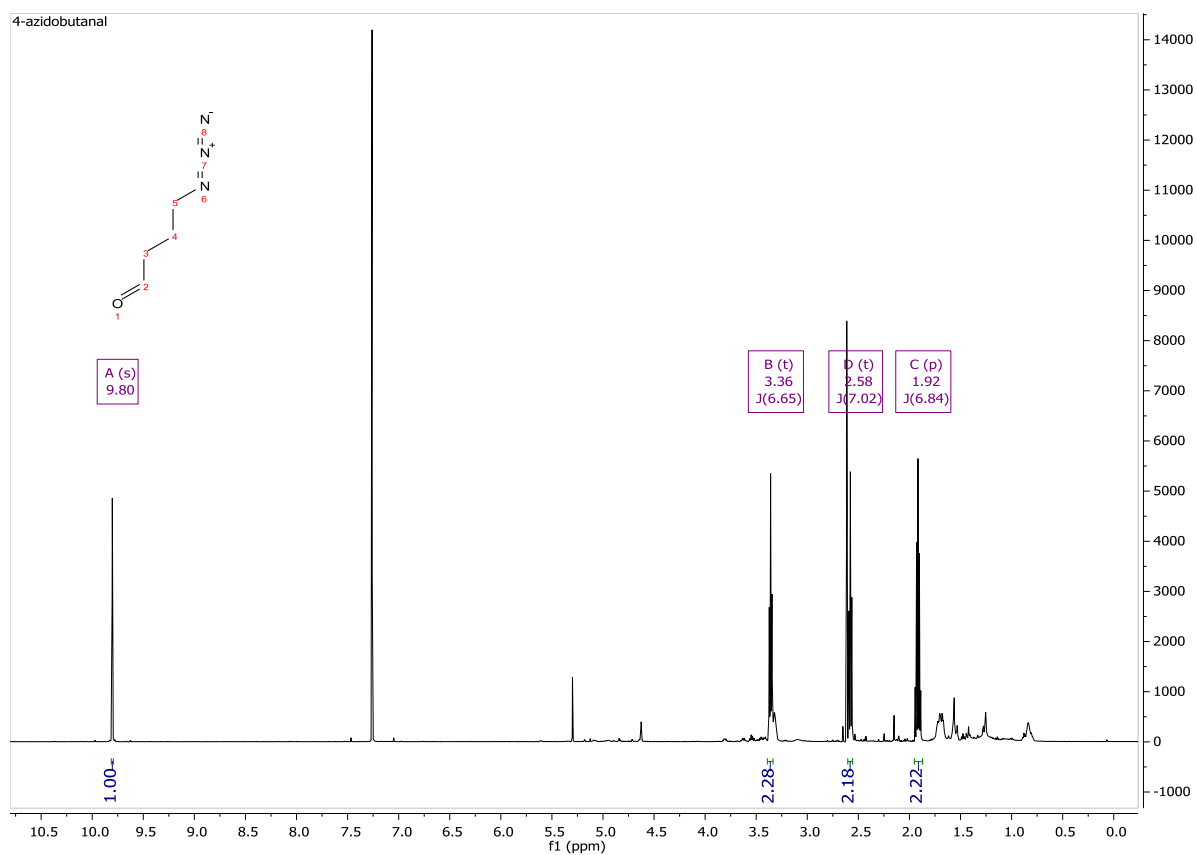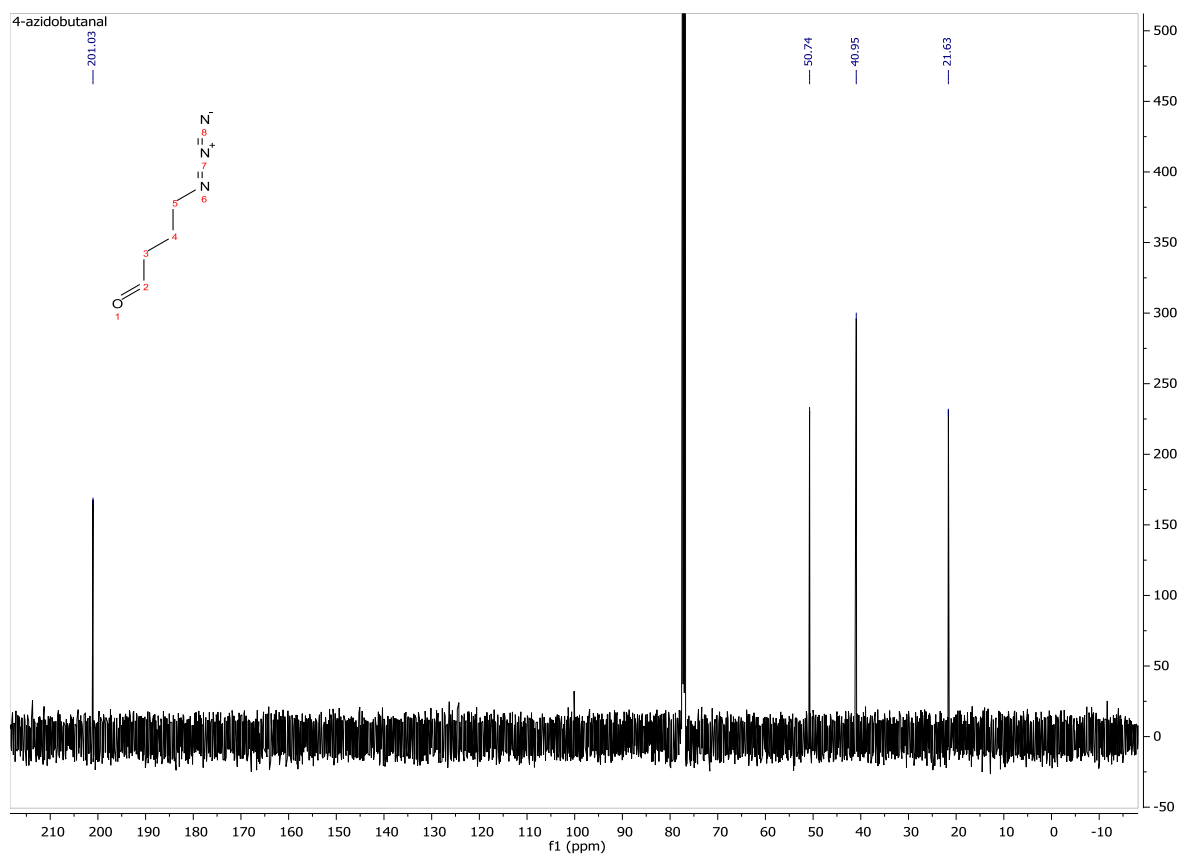

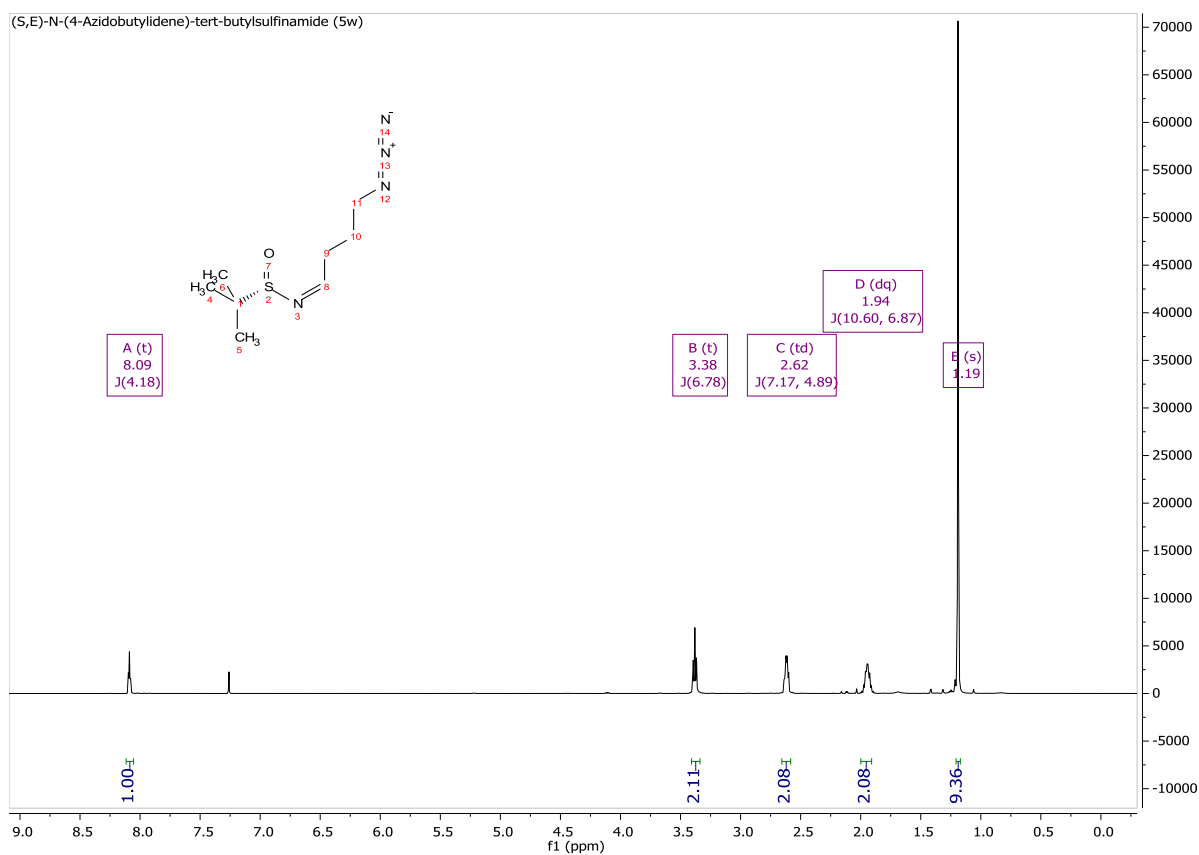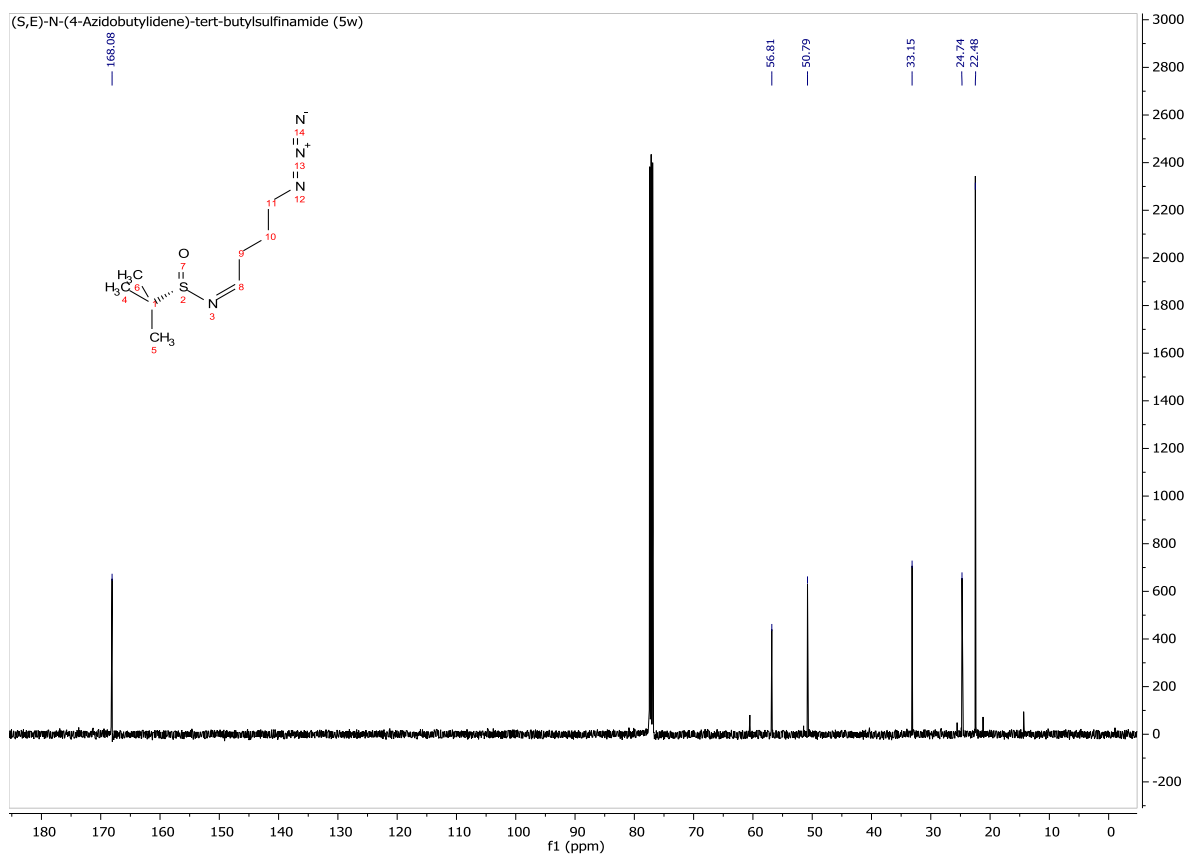

## Trimethylsilyl protected propargylamines **6**

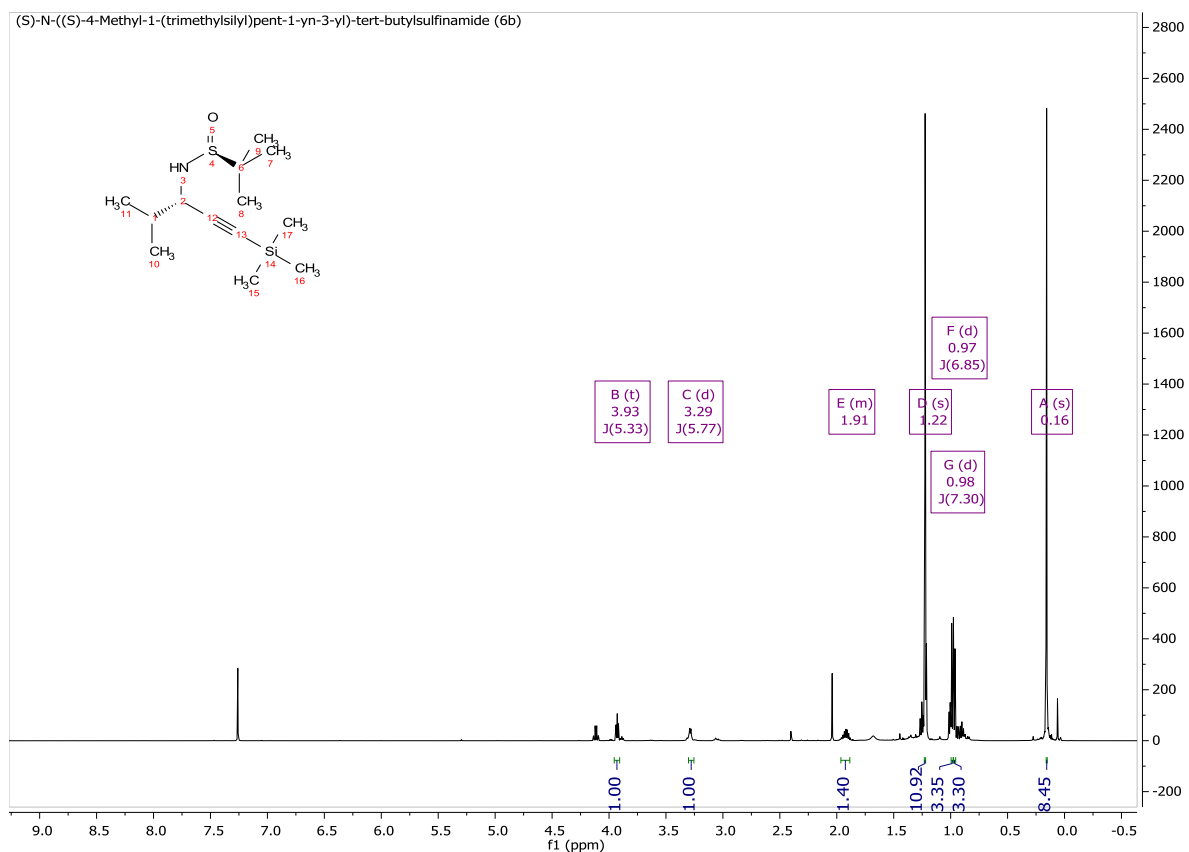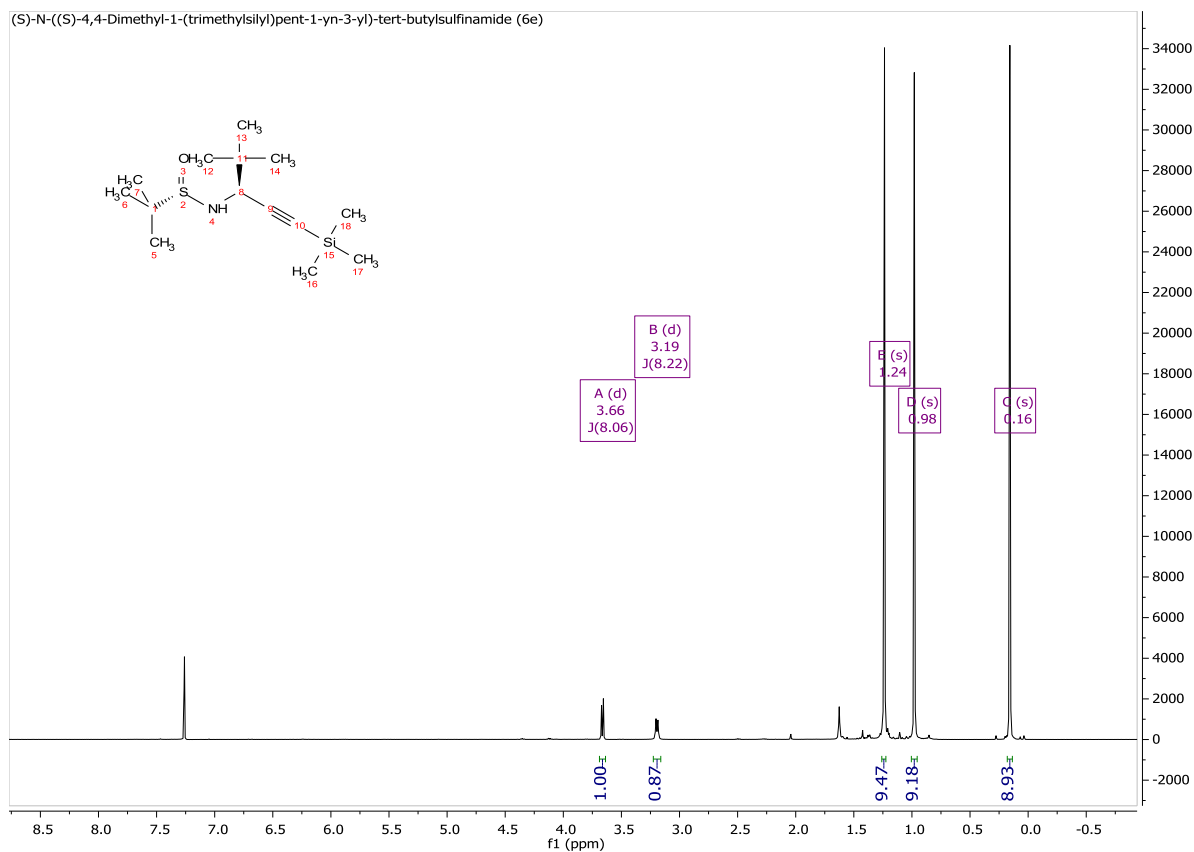

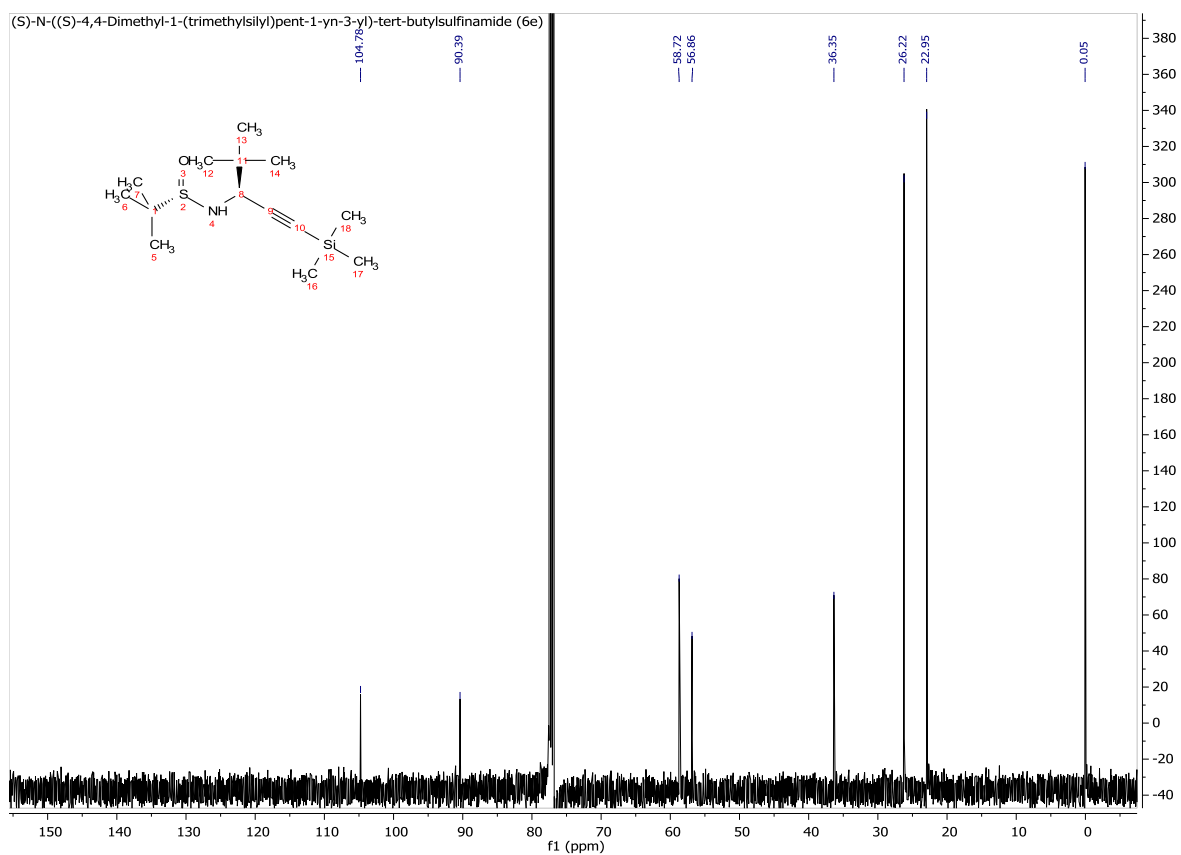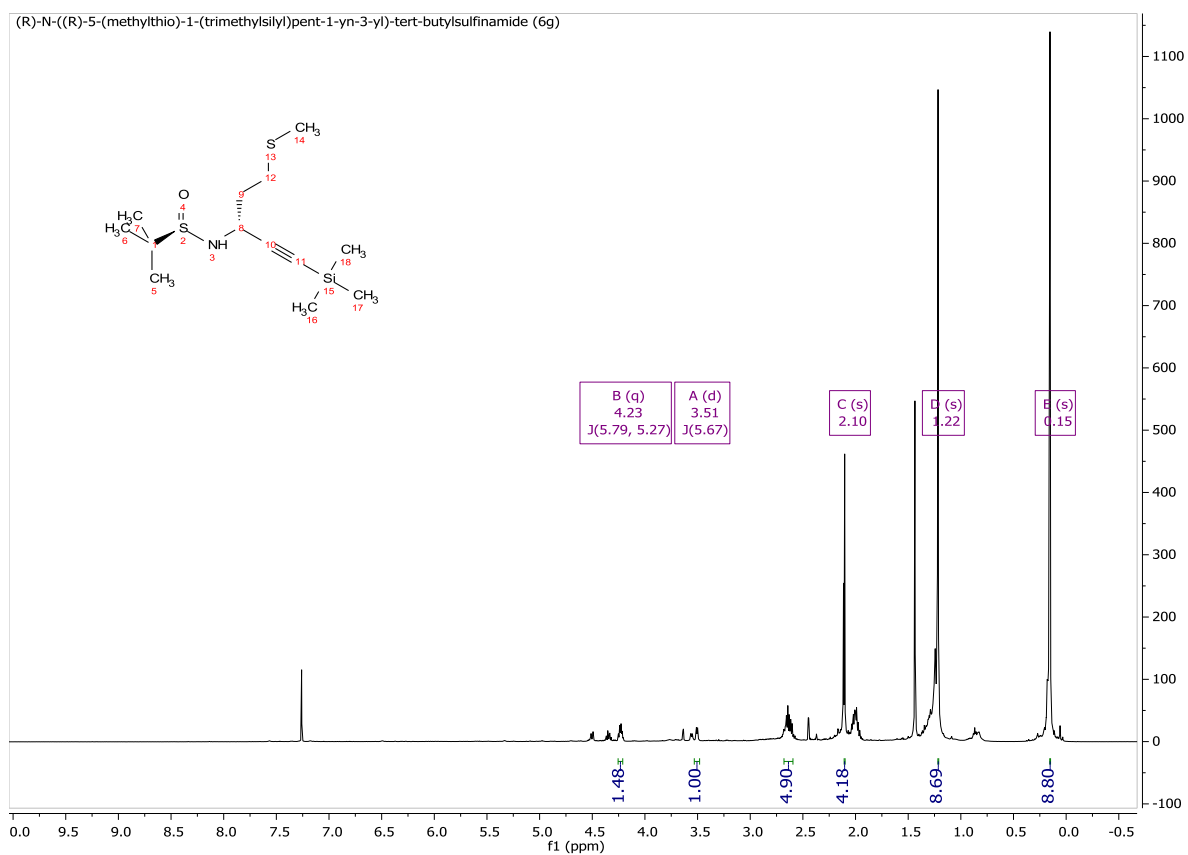



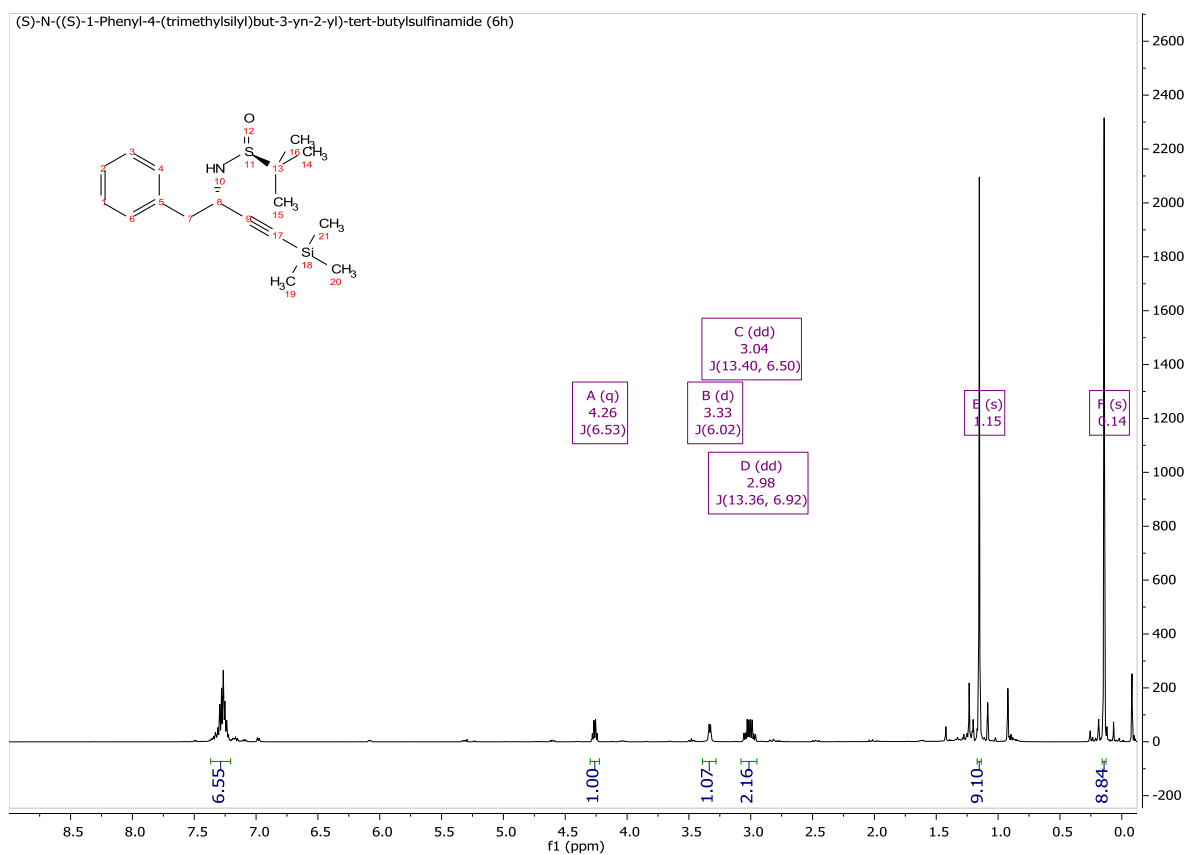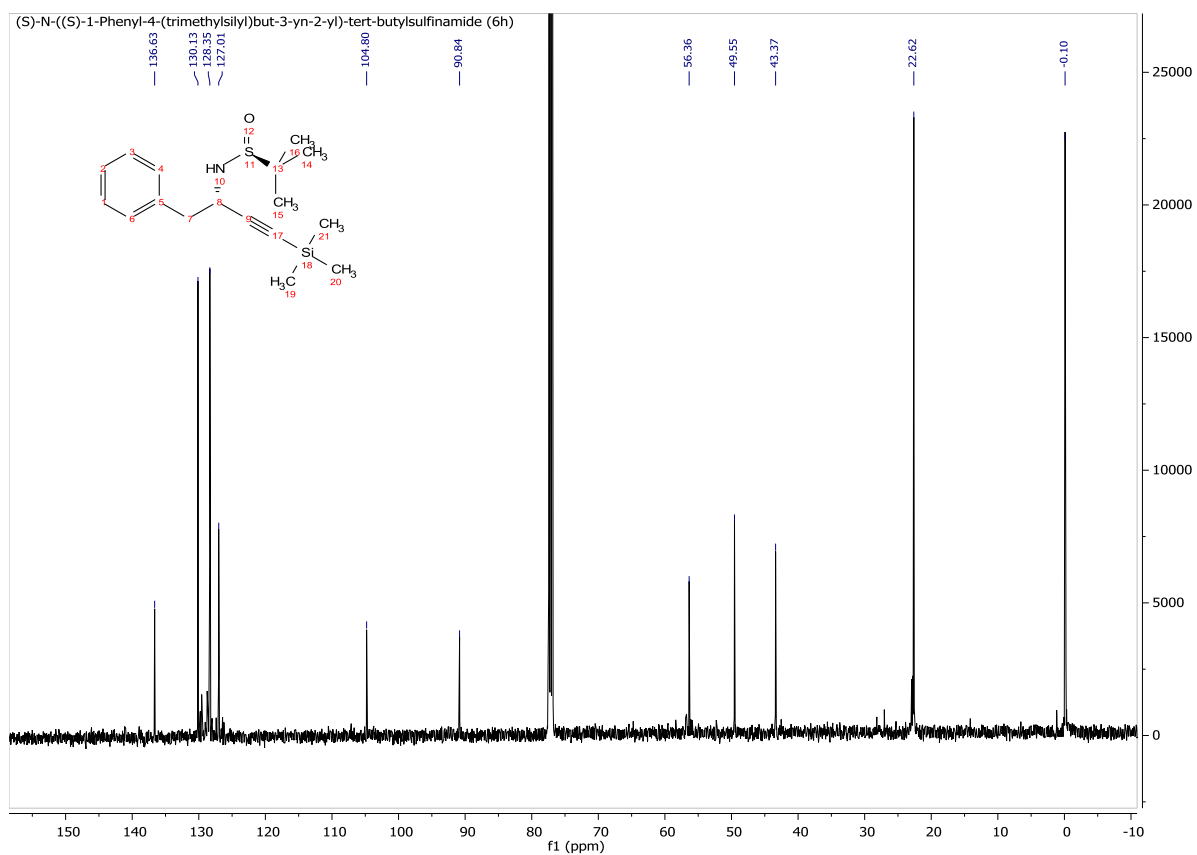

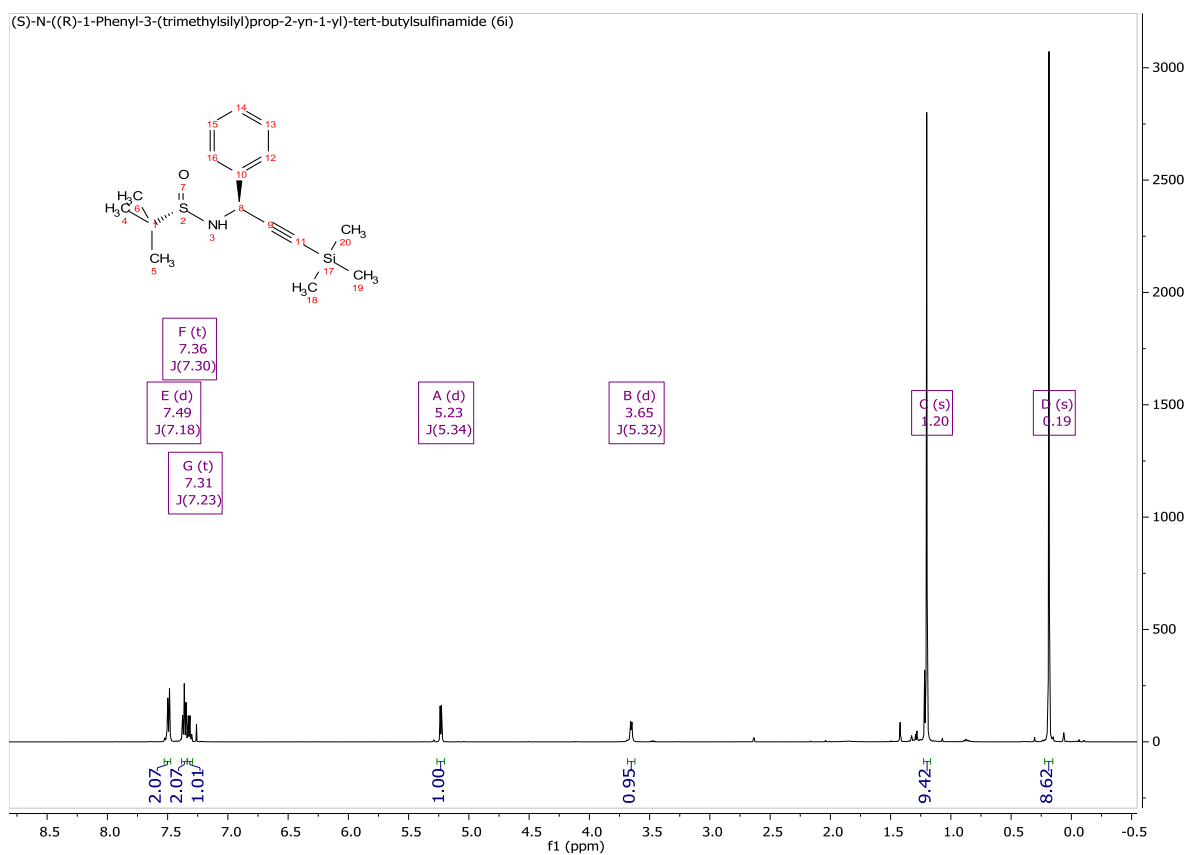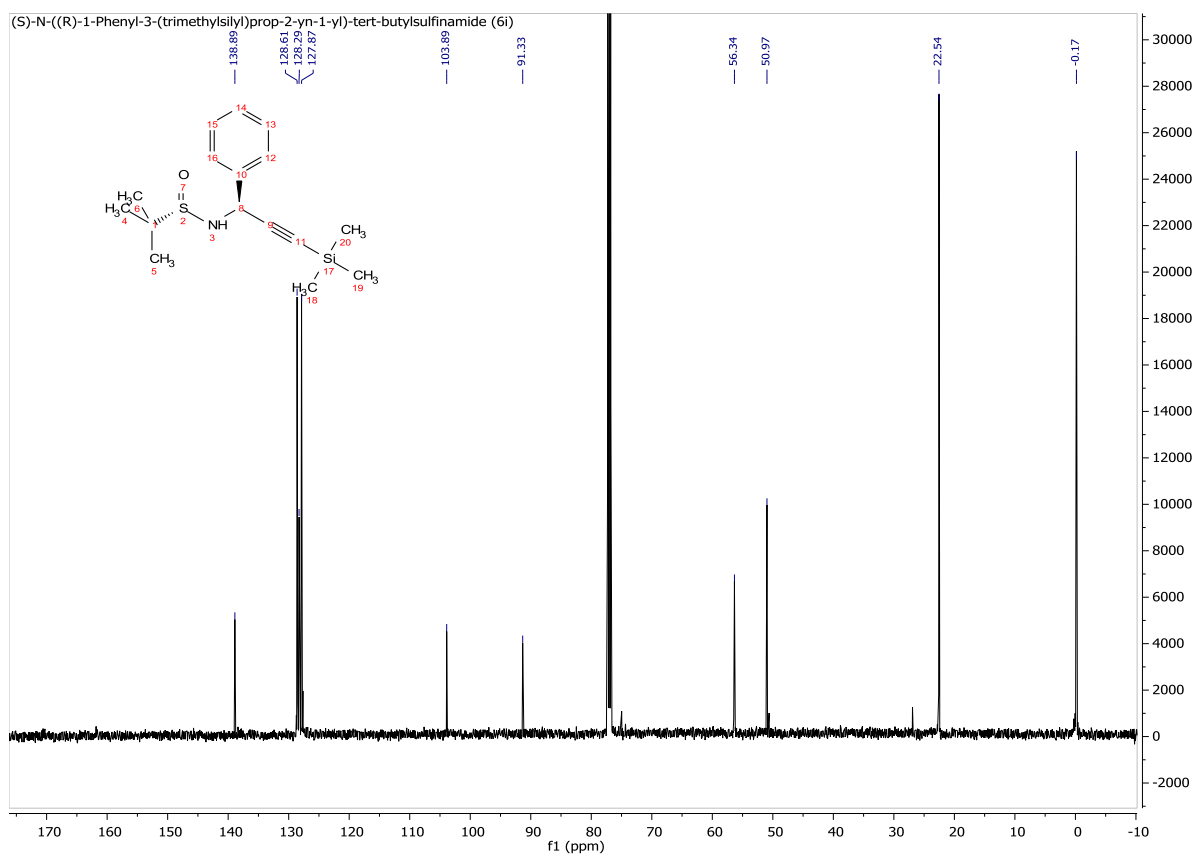

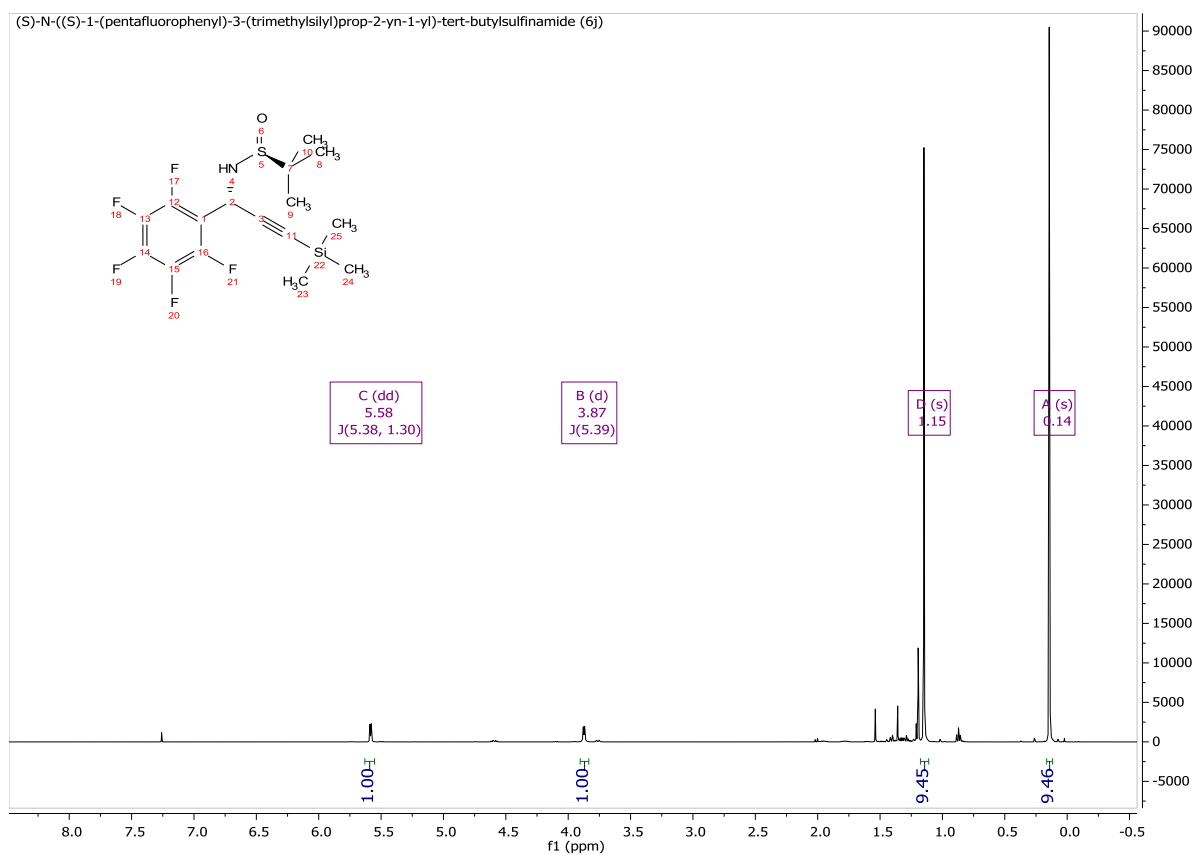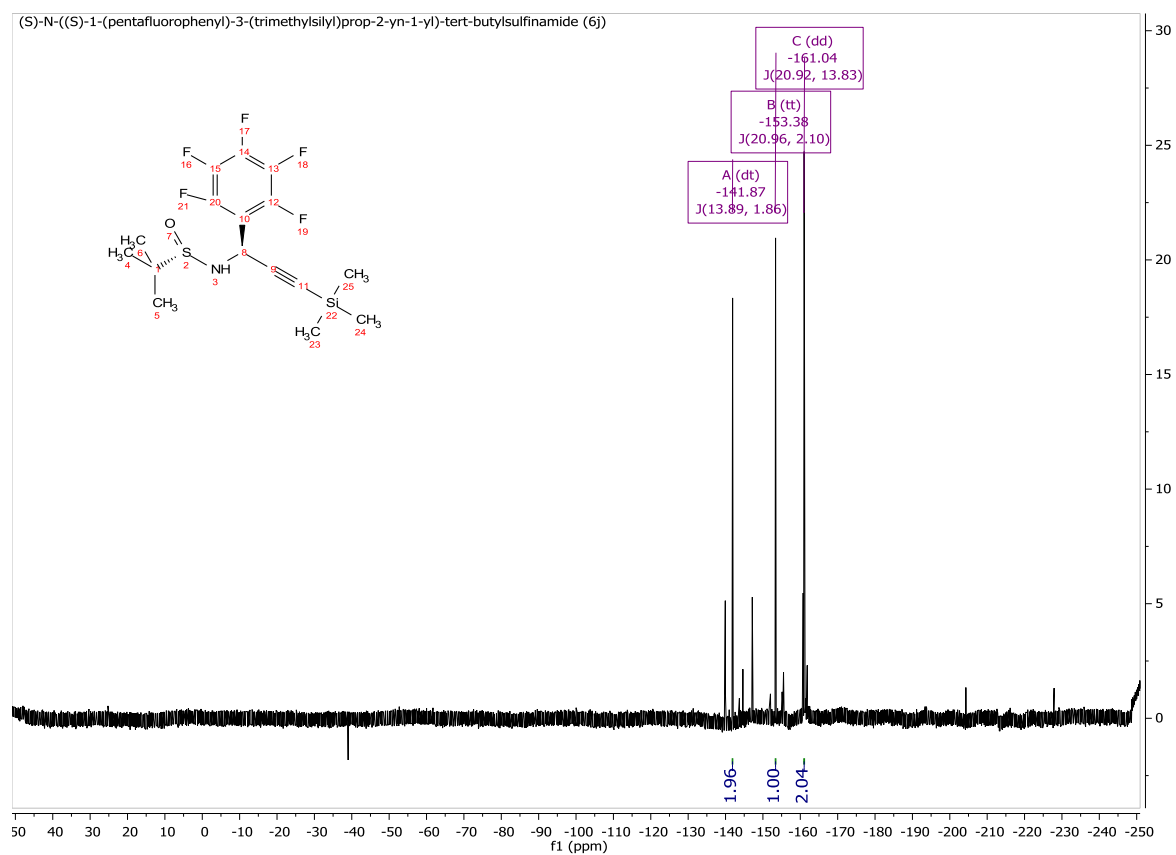

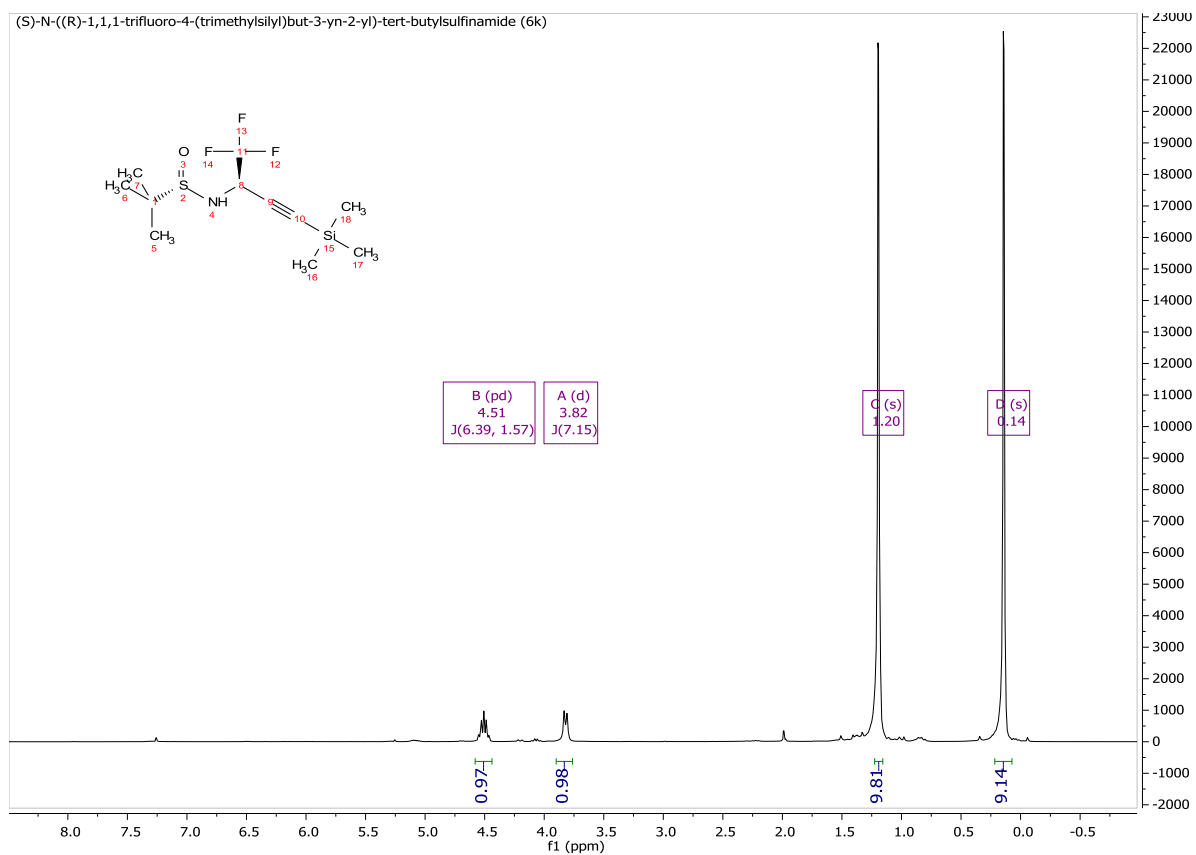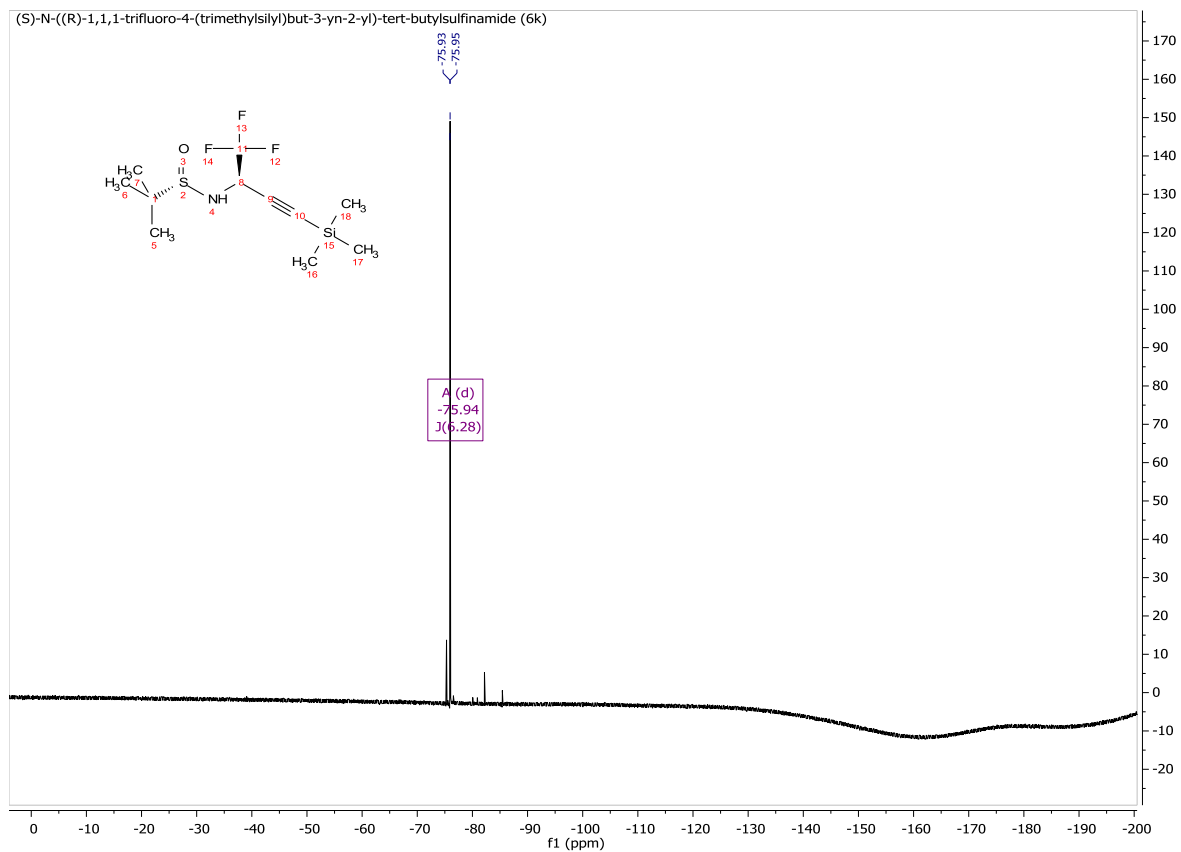

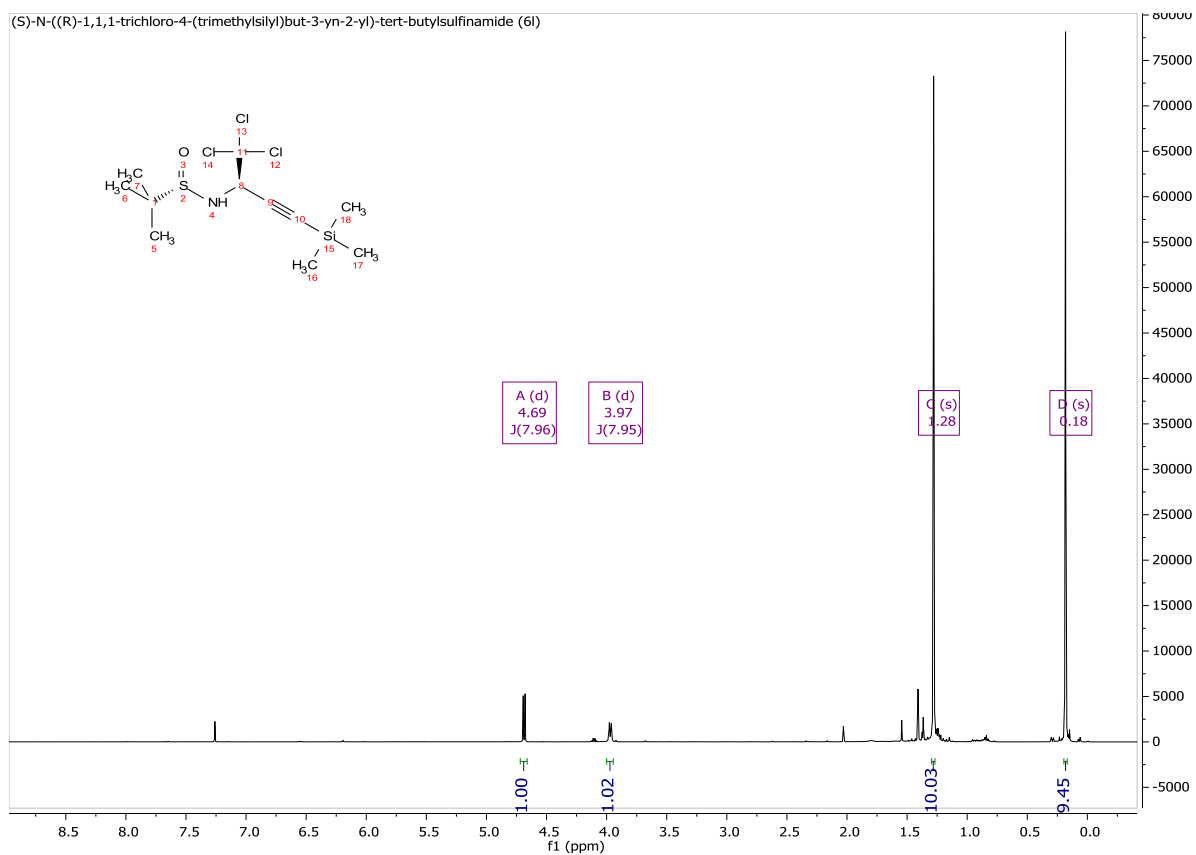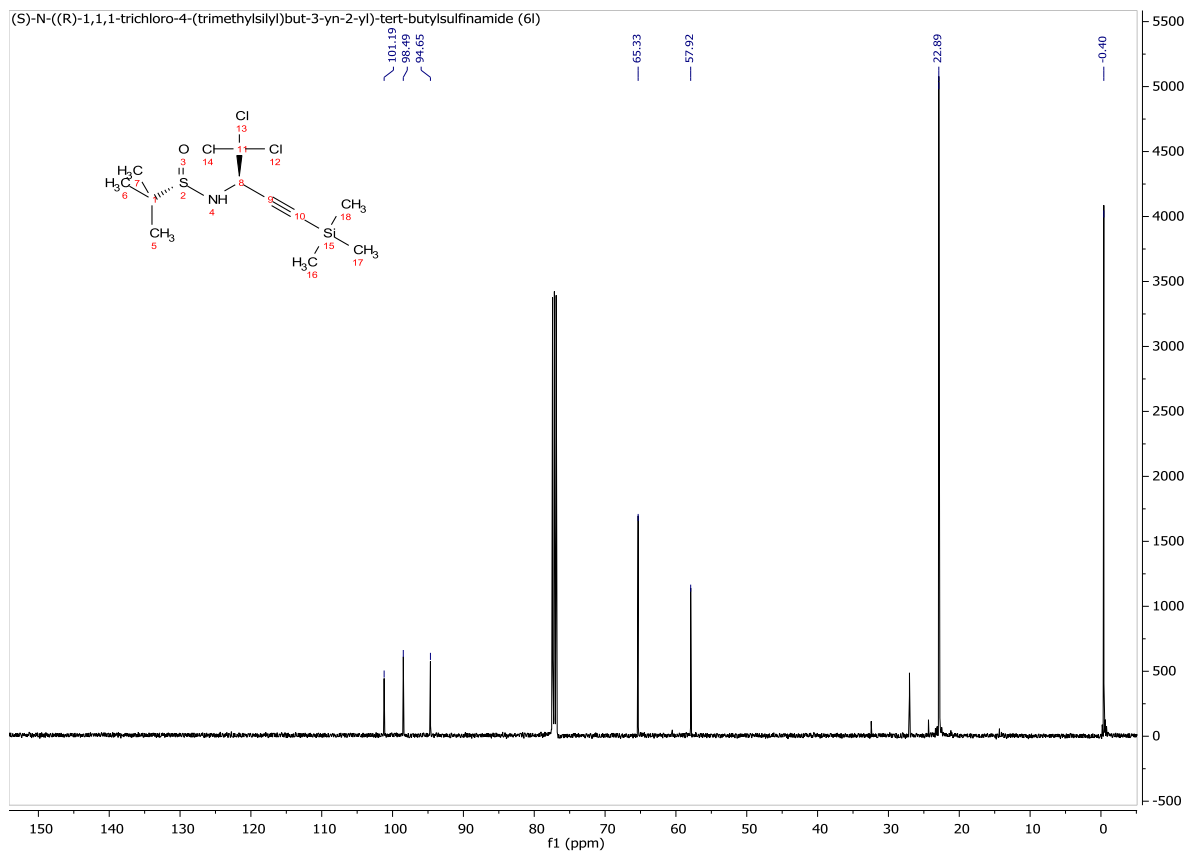

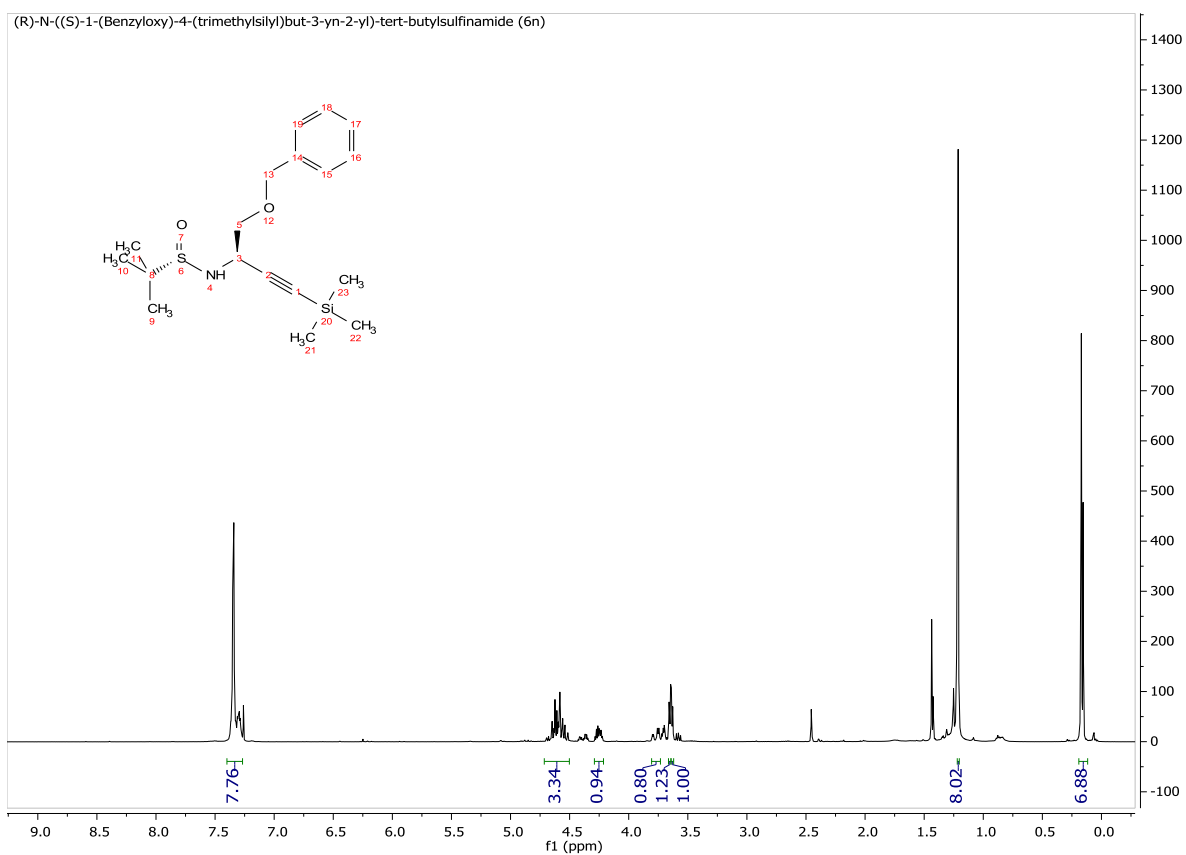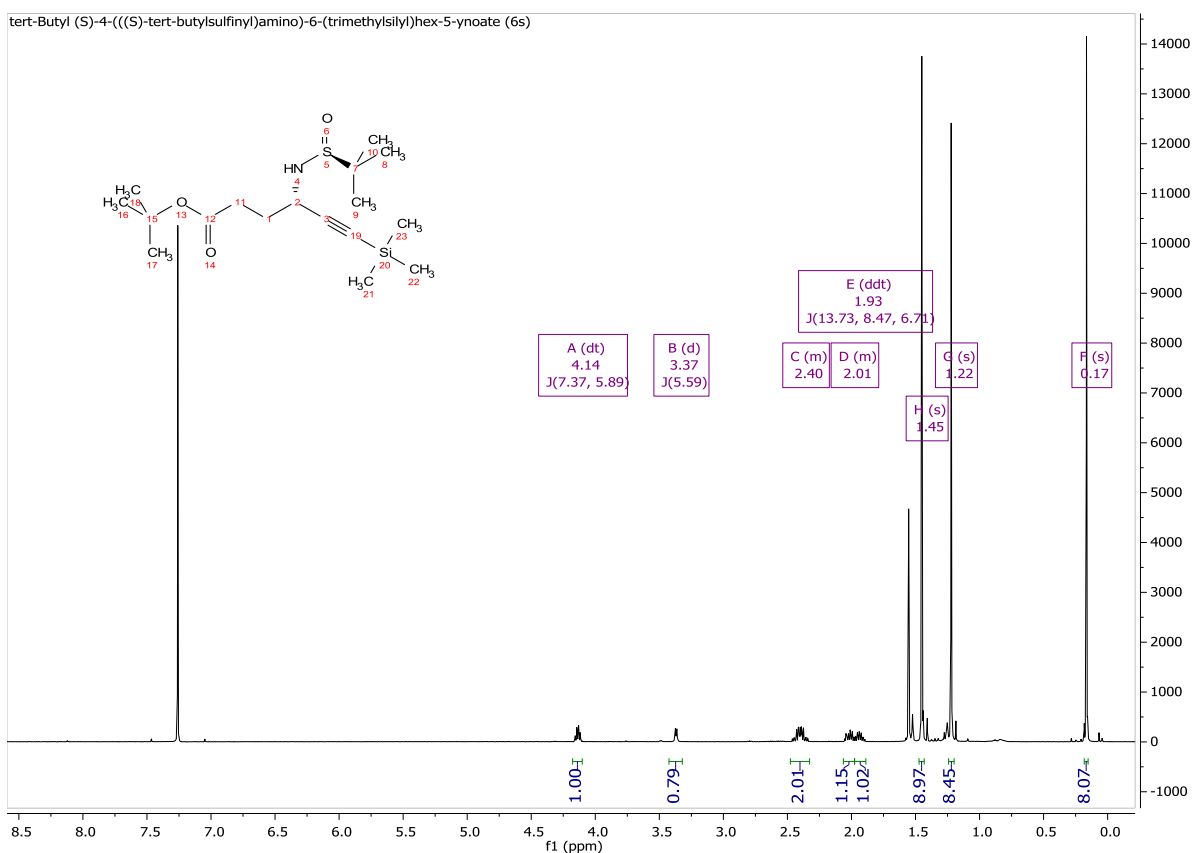

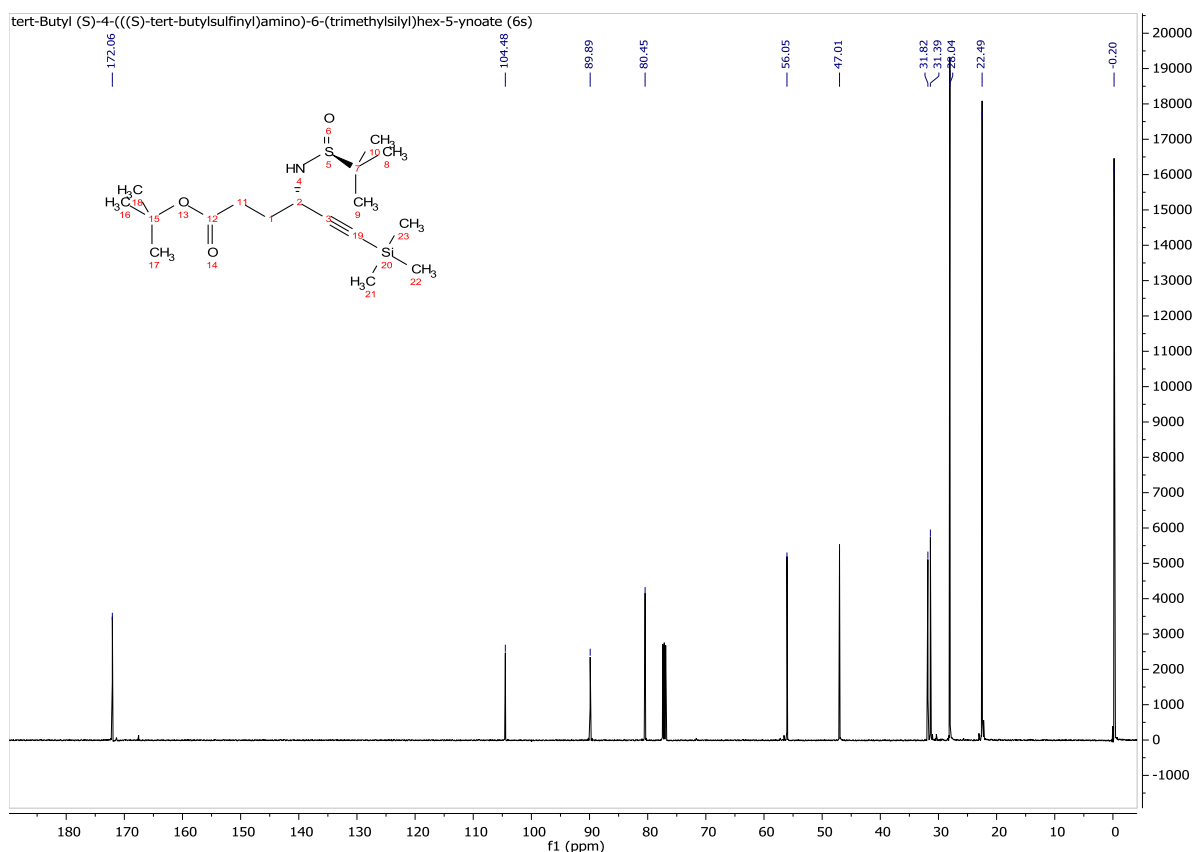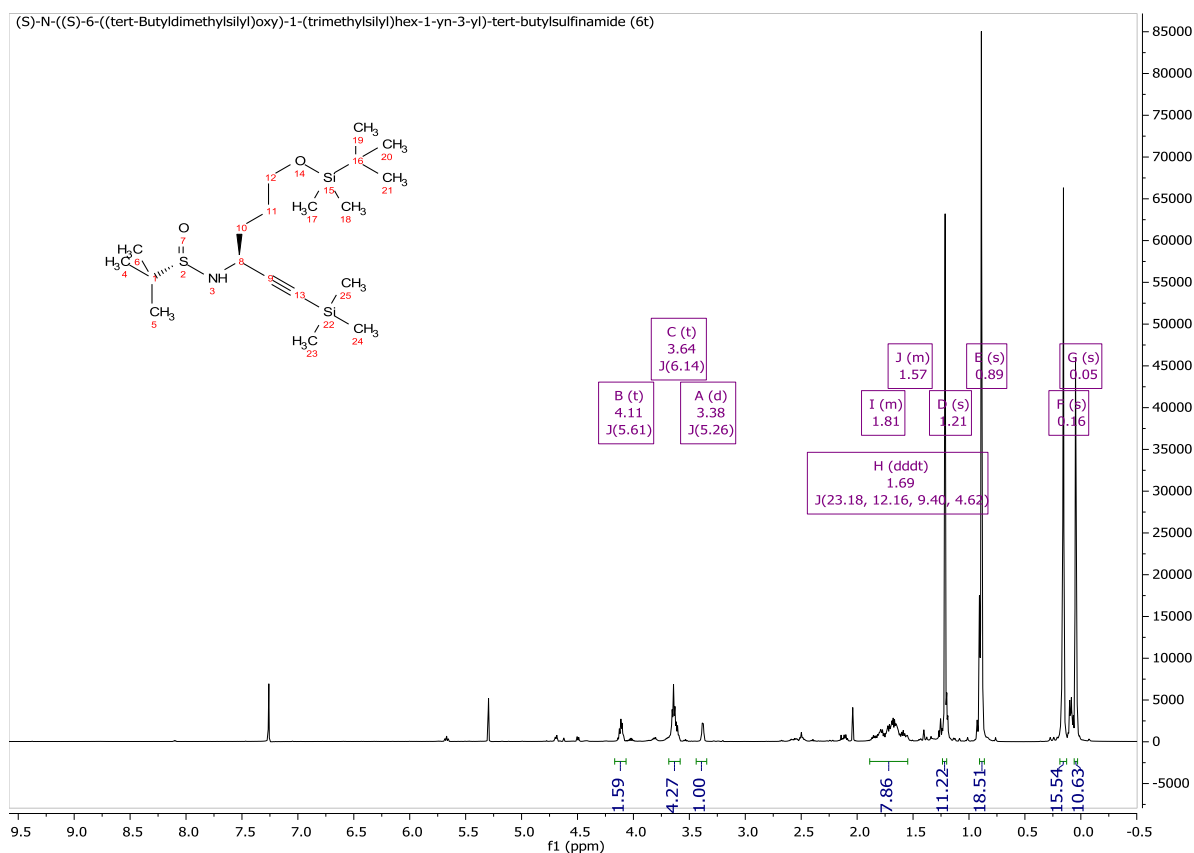

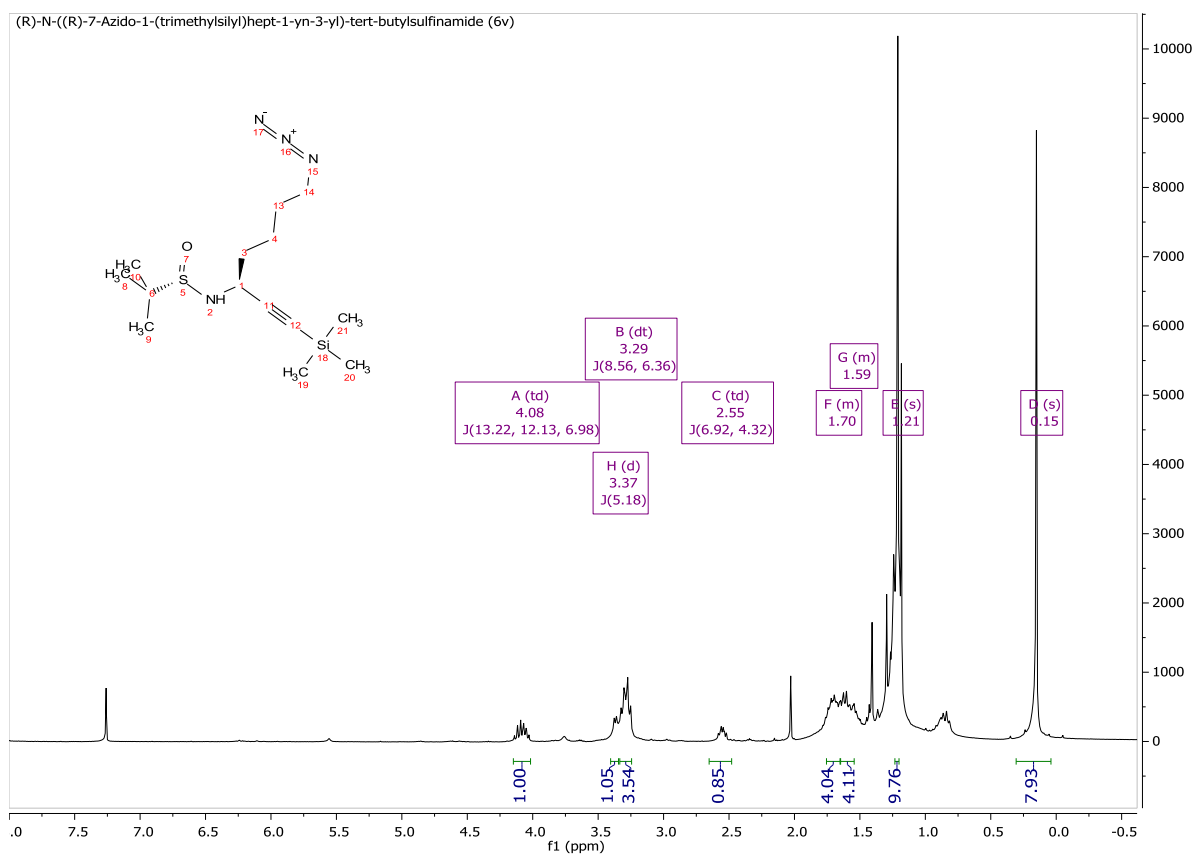

## Propargylamines 7

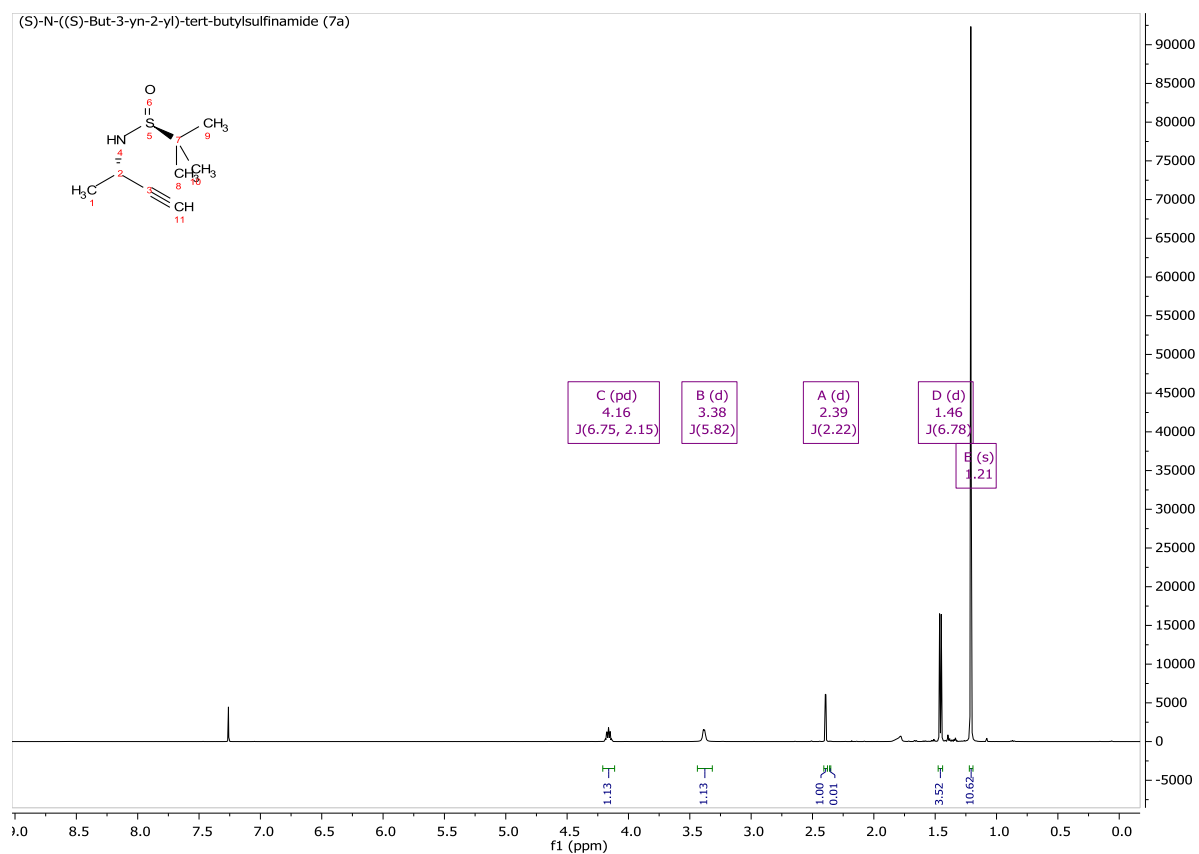



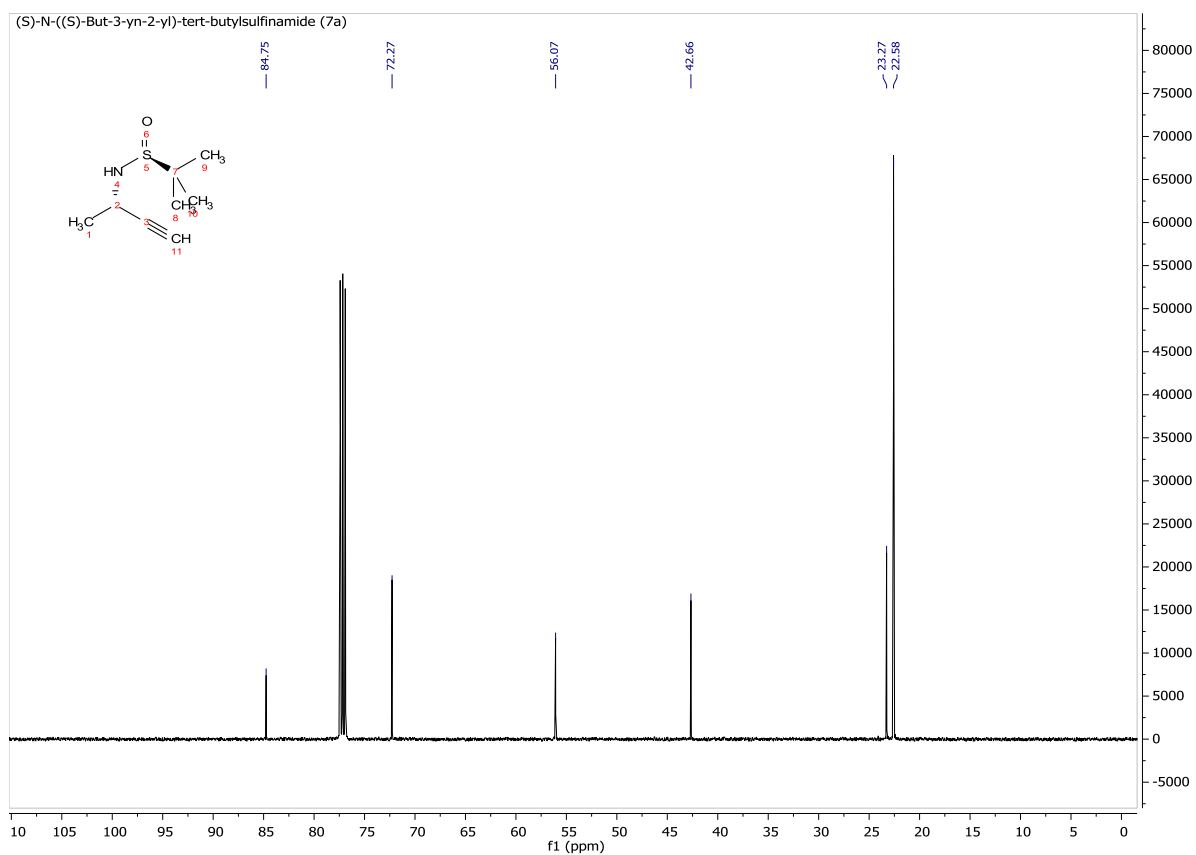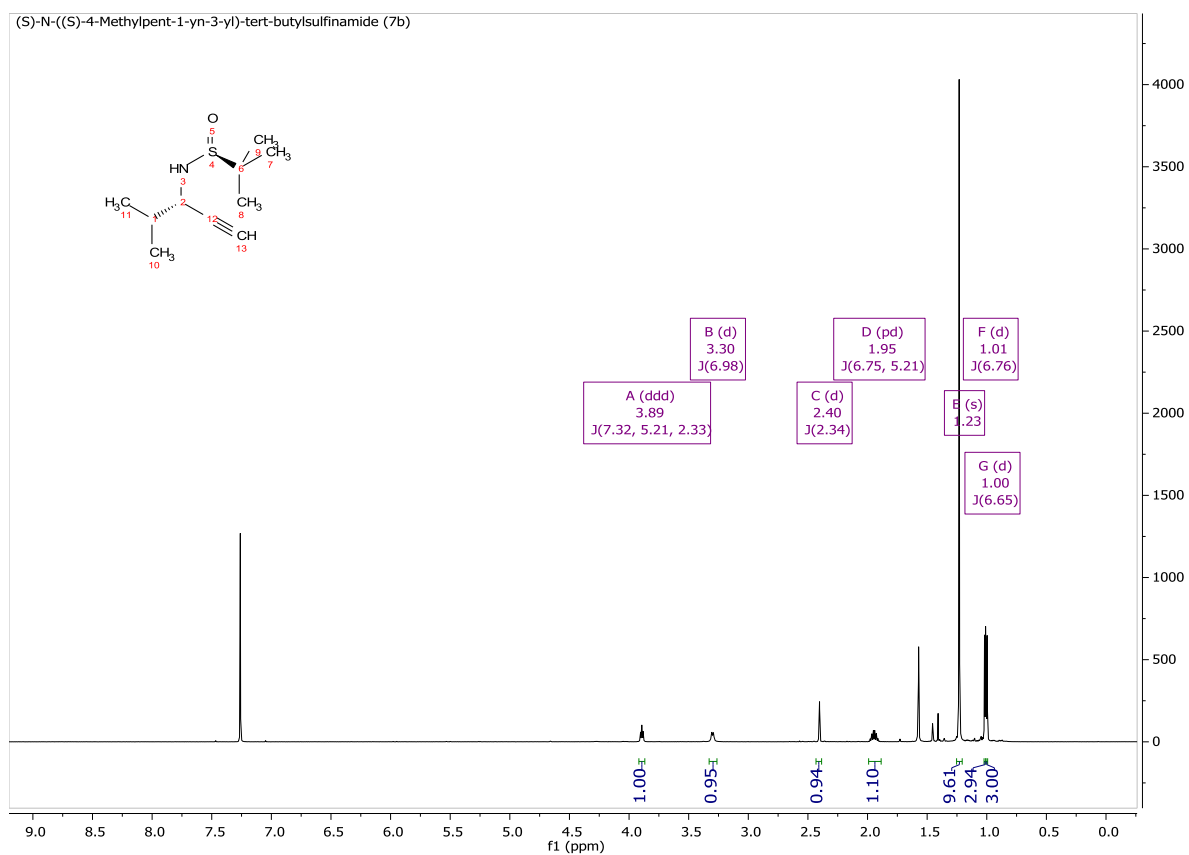

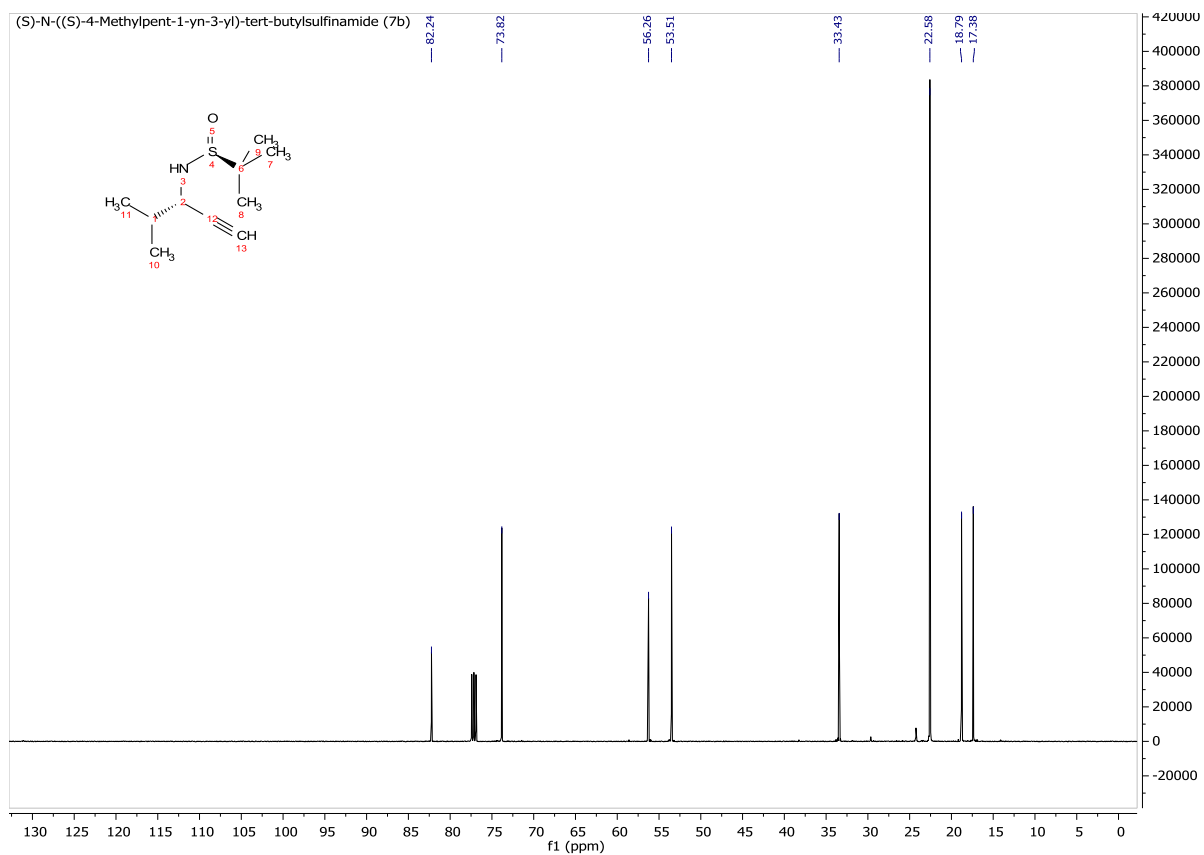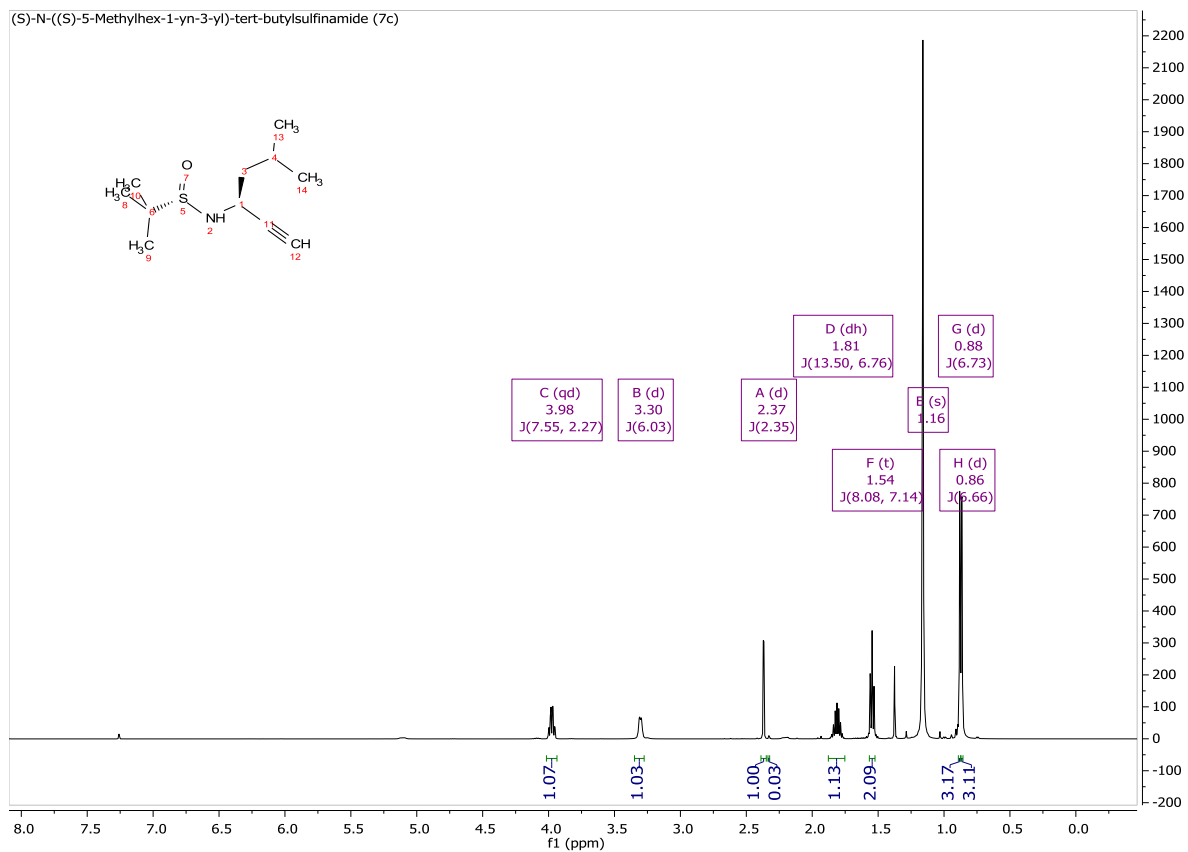

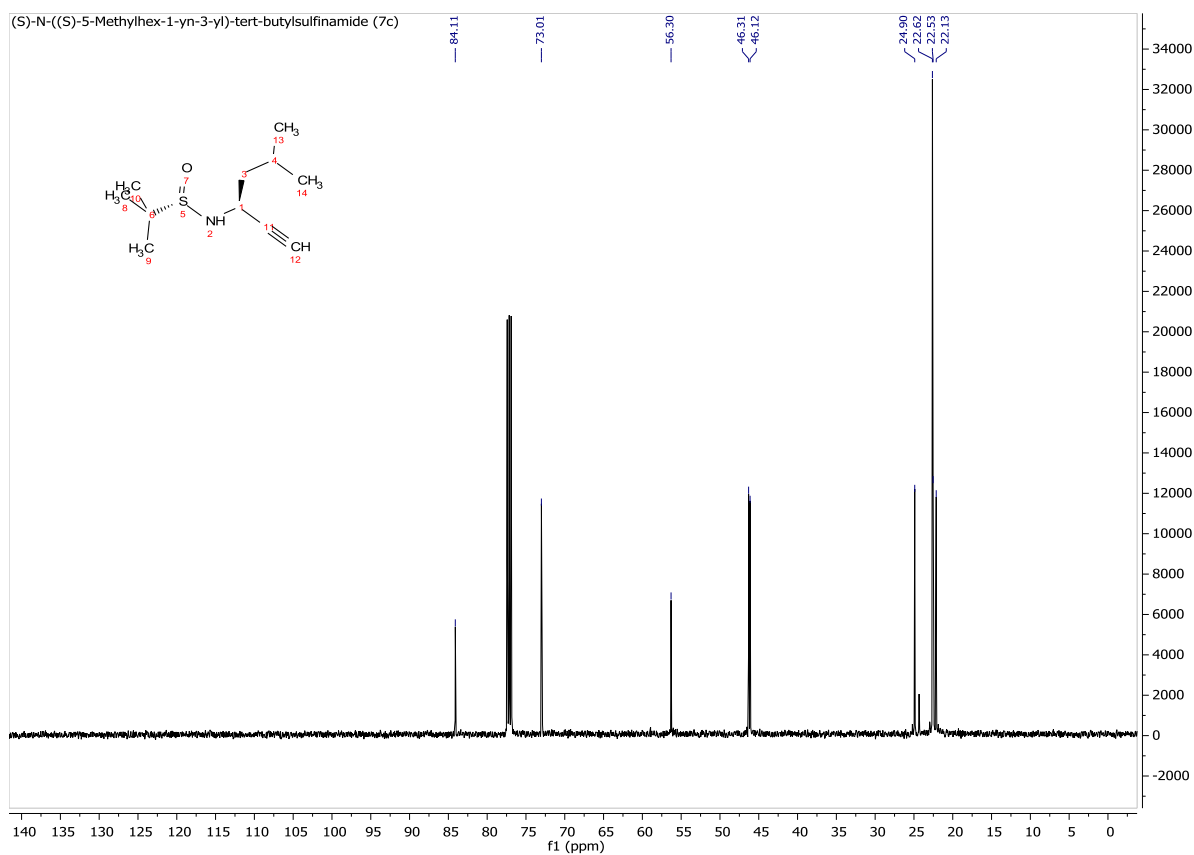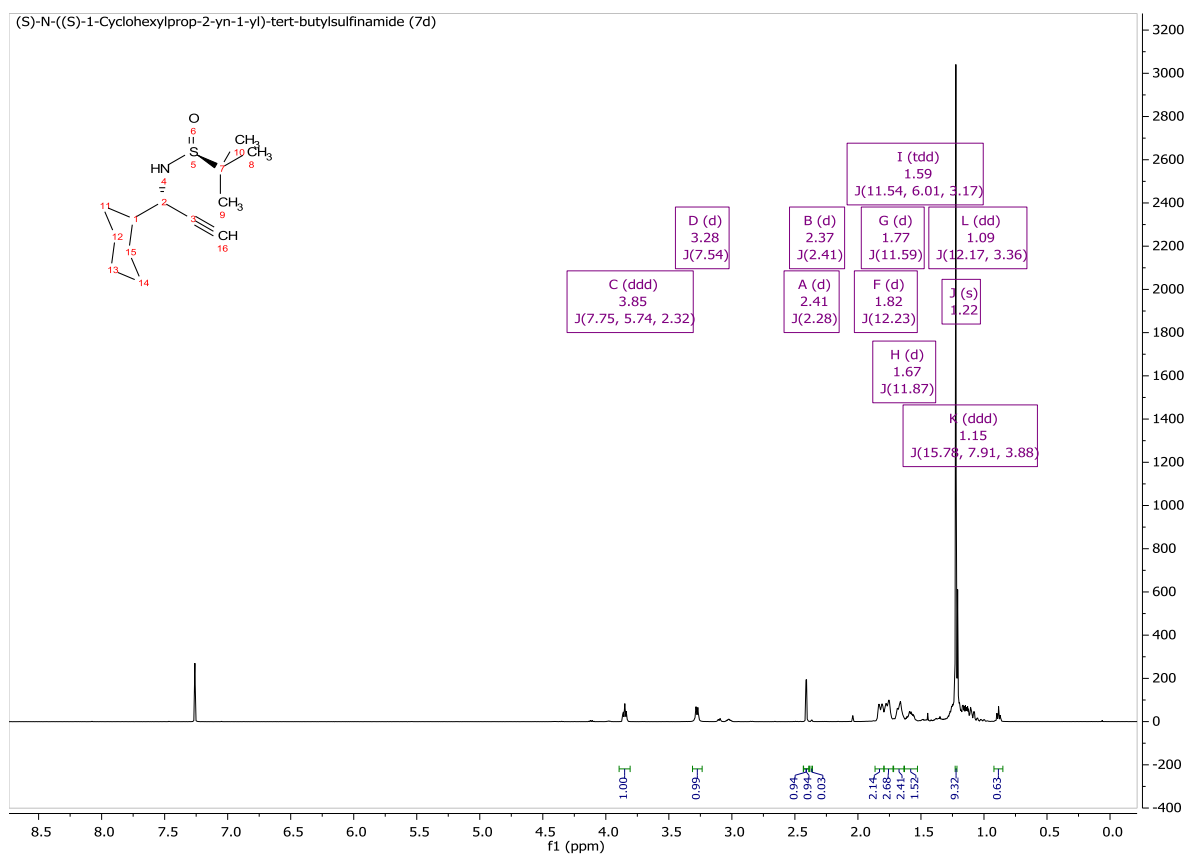

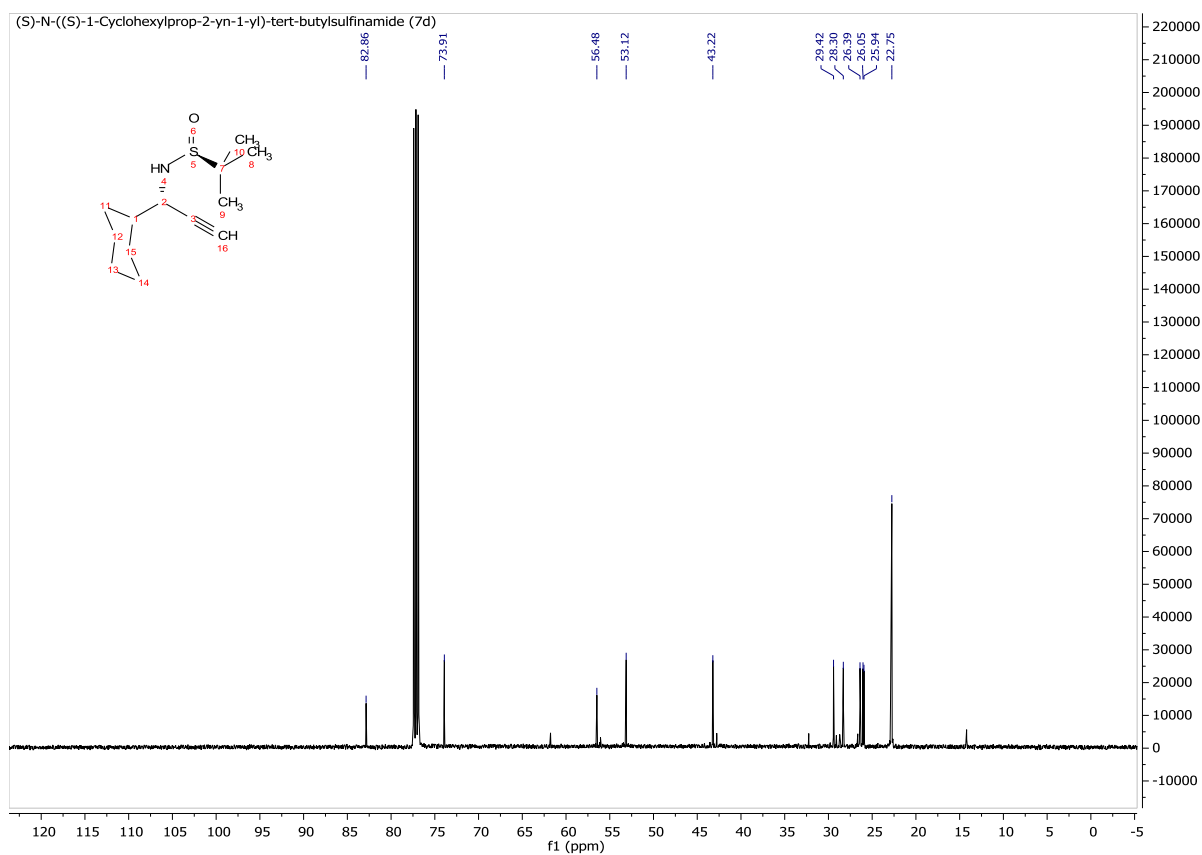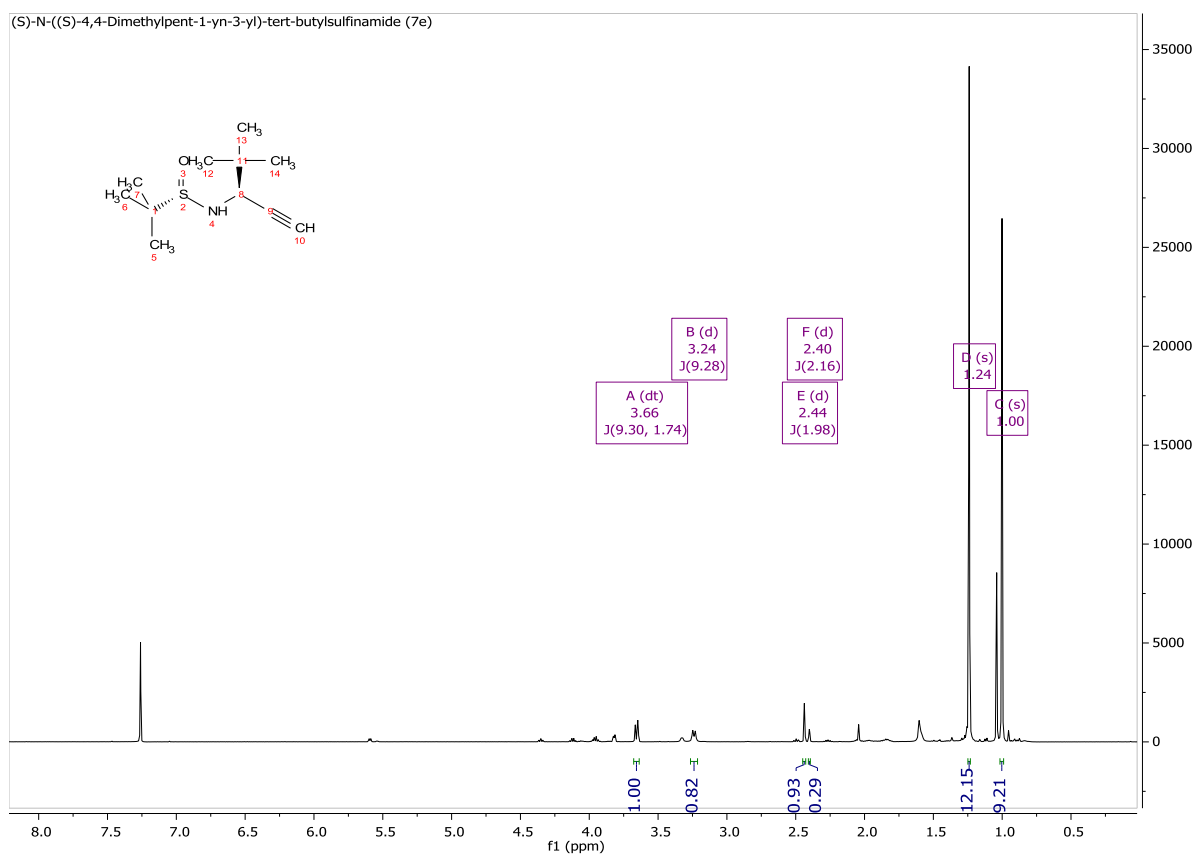

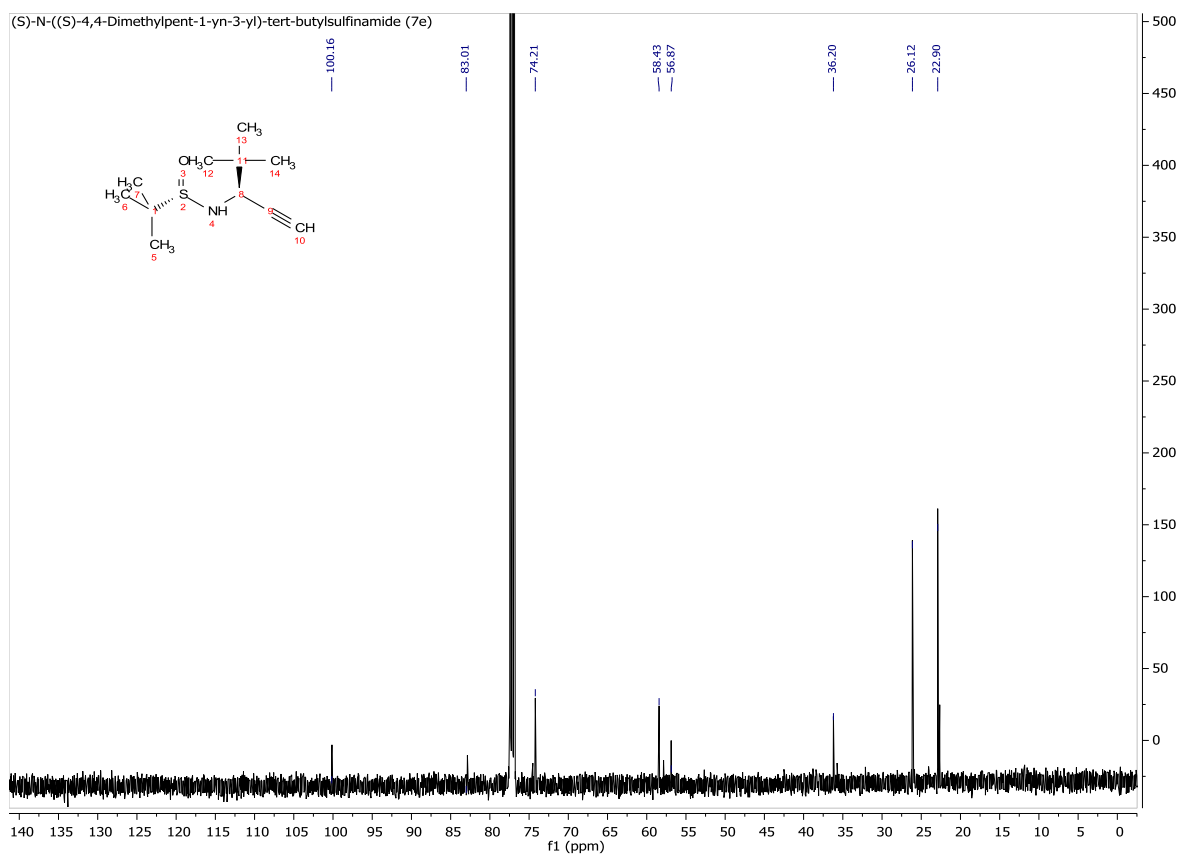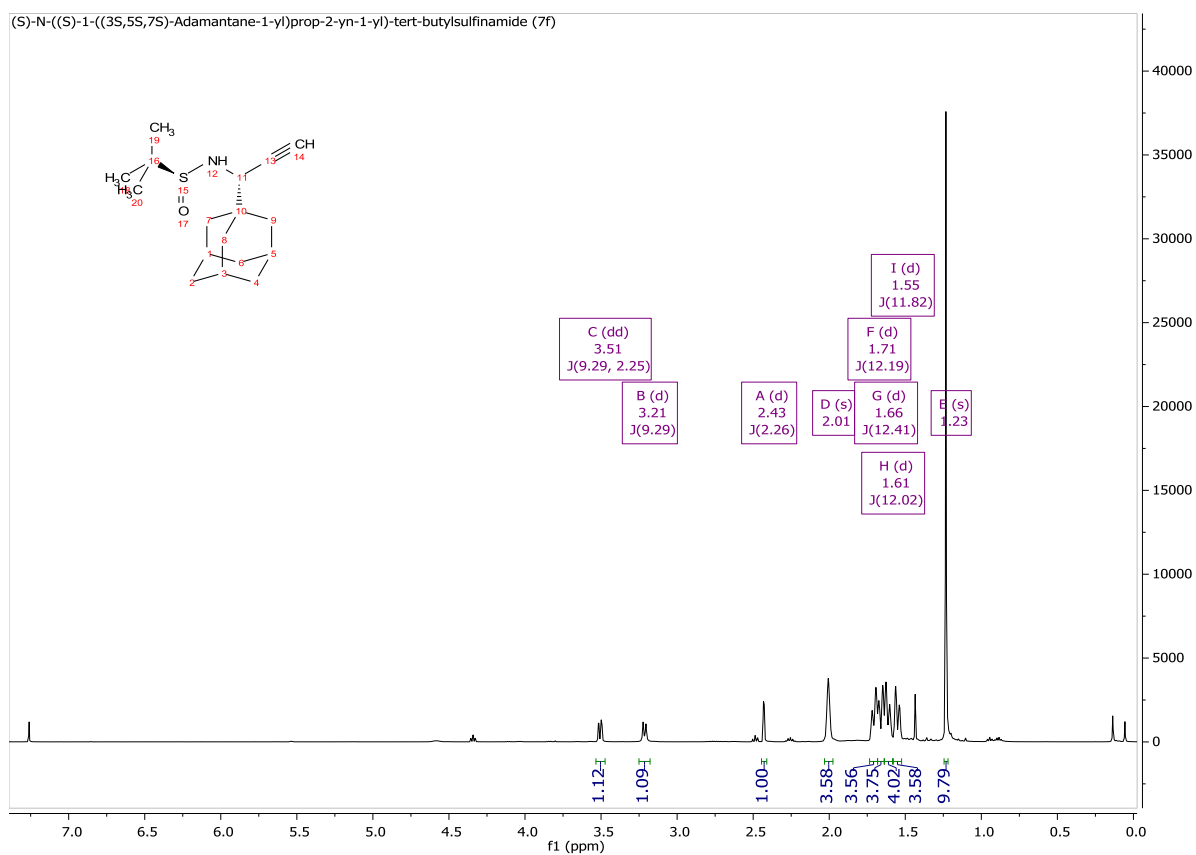

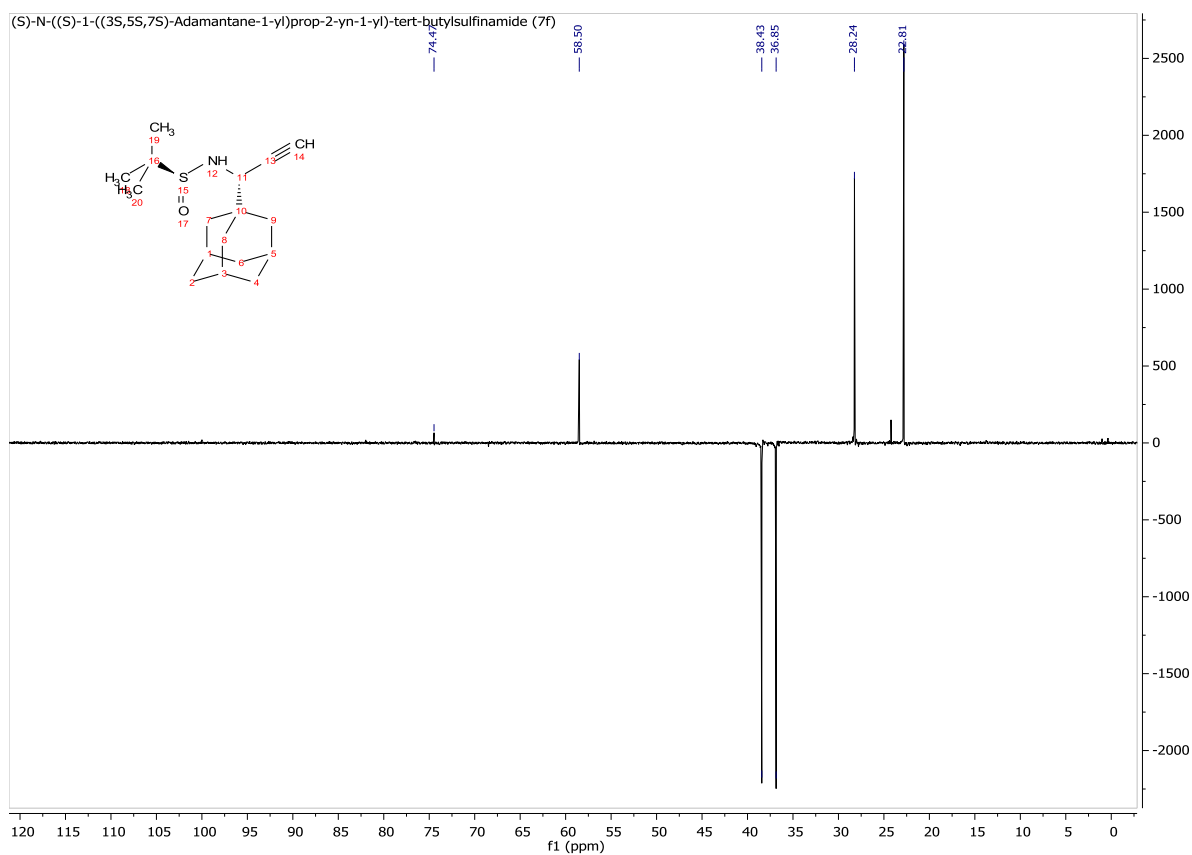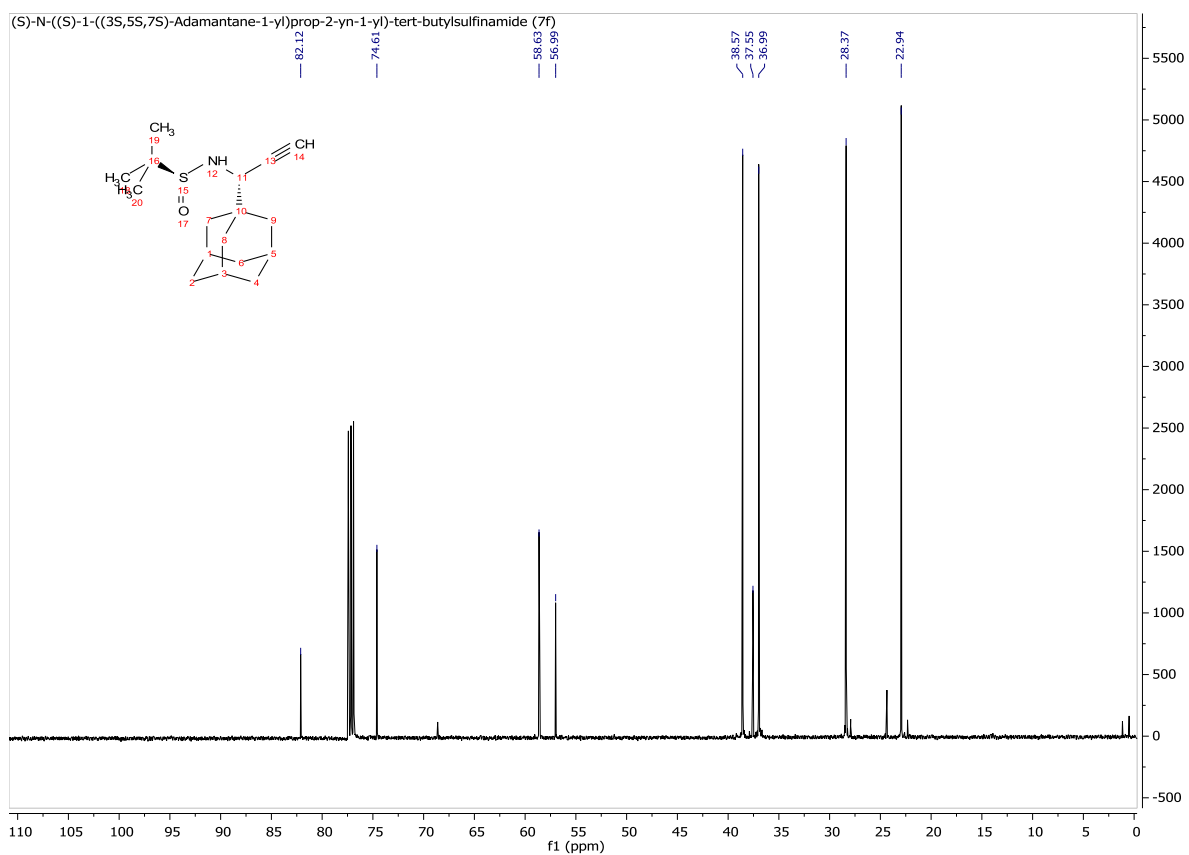

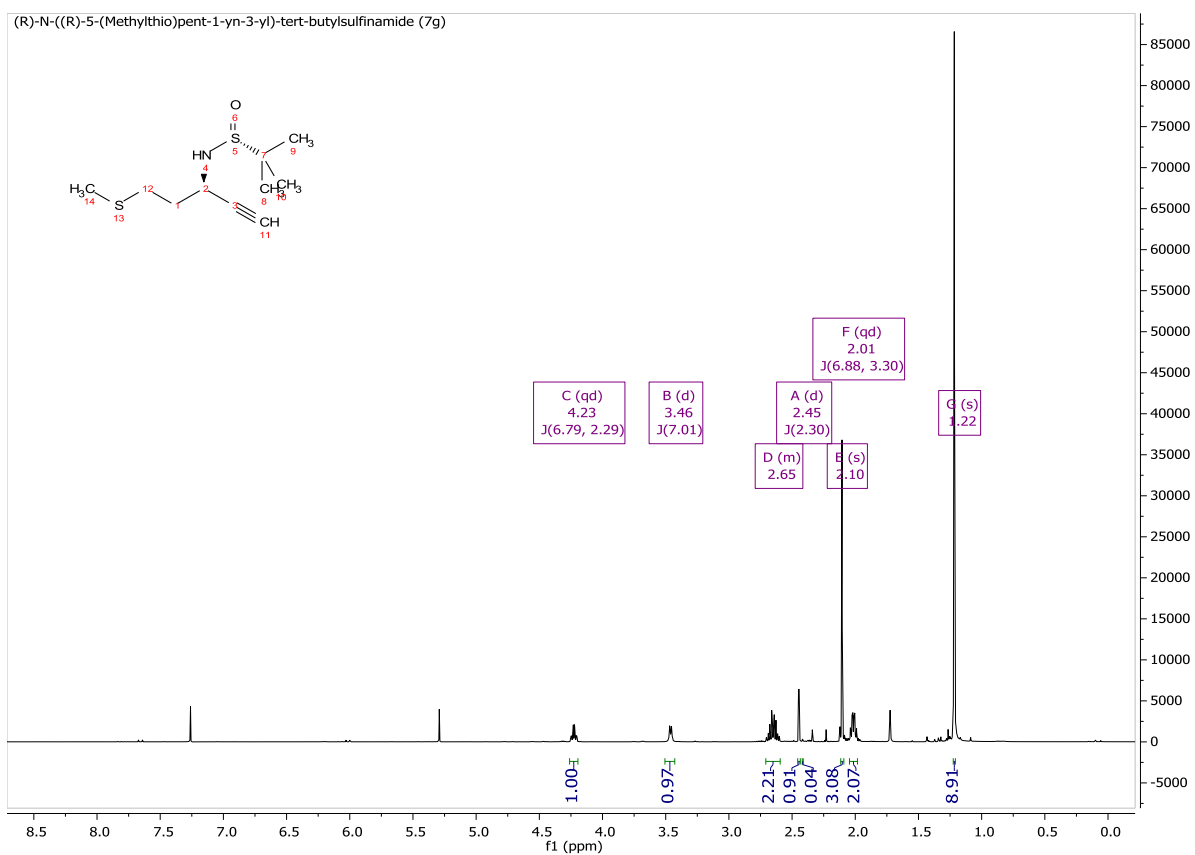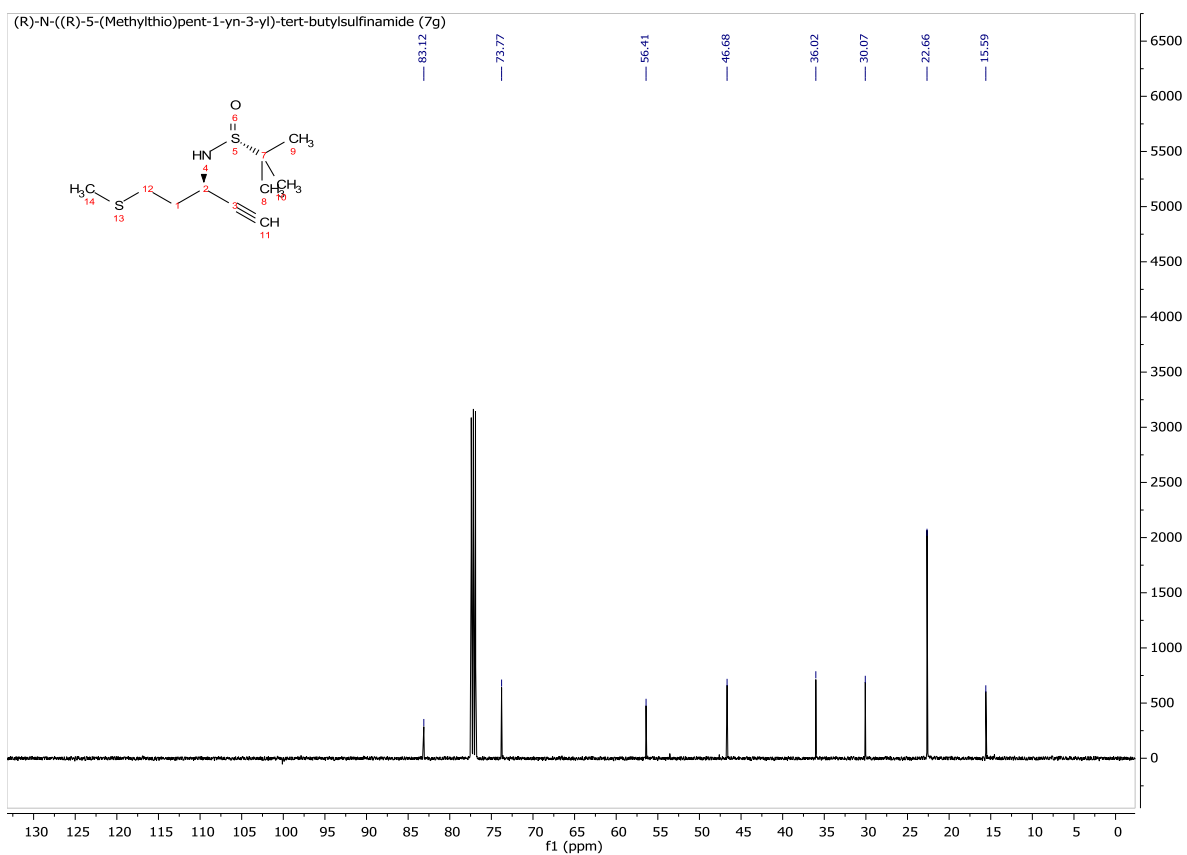

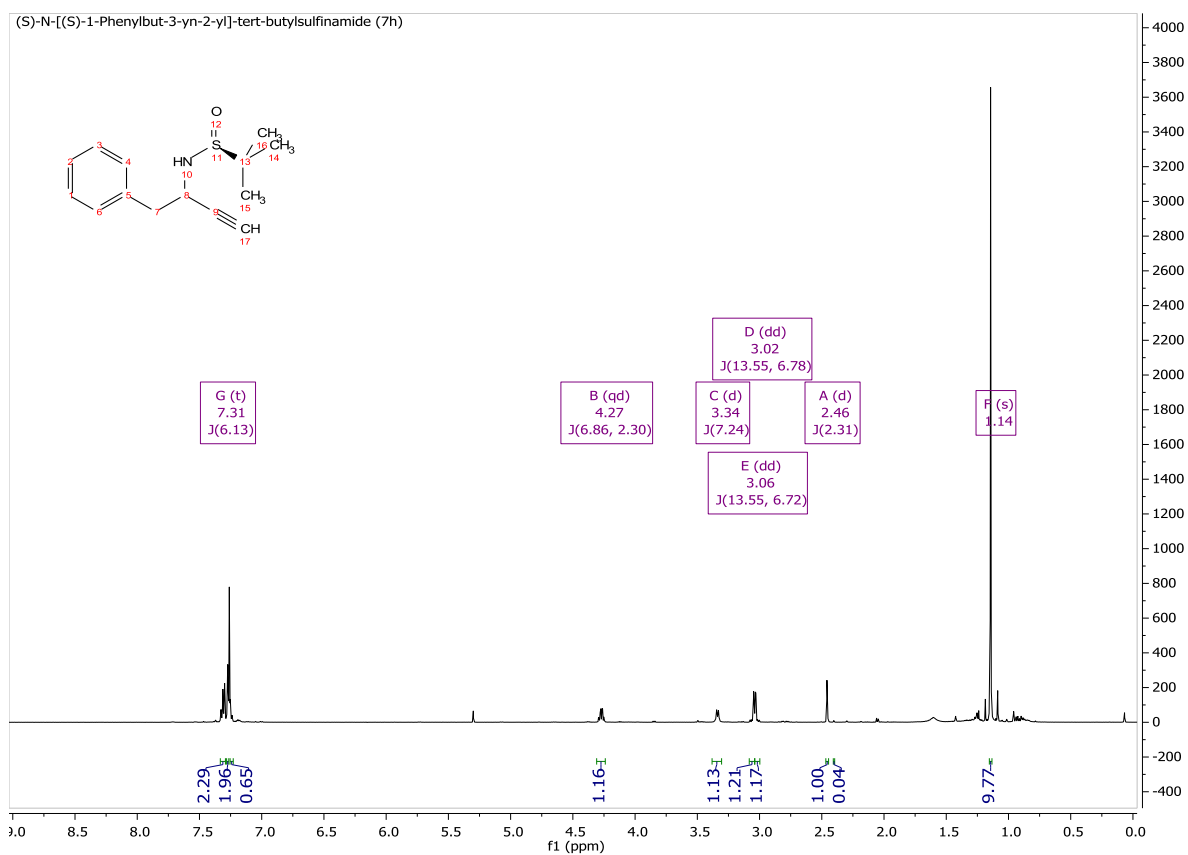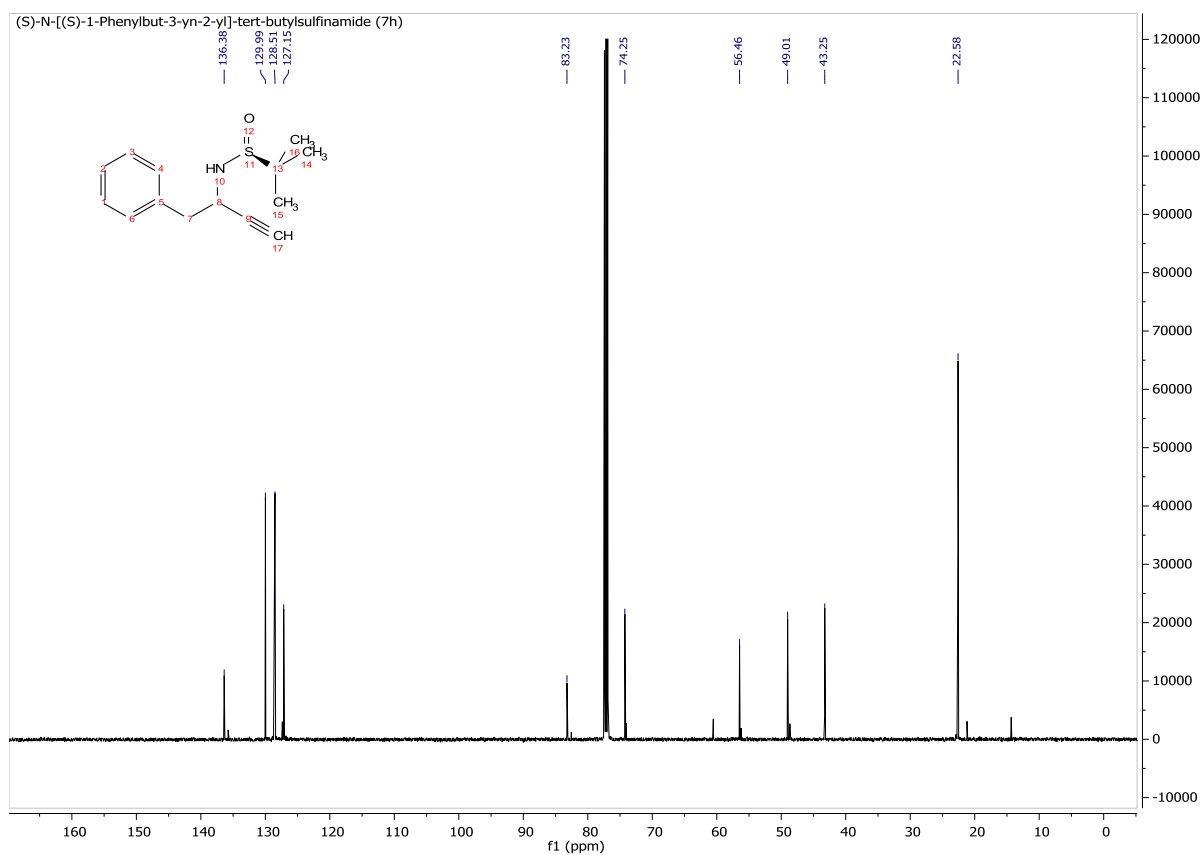



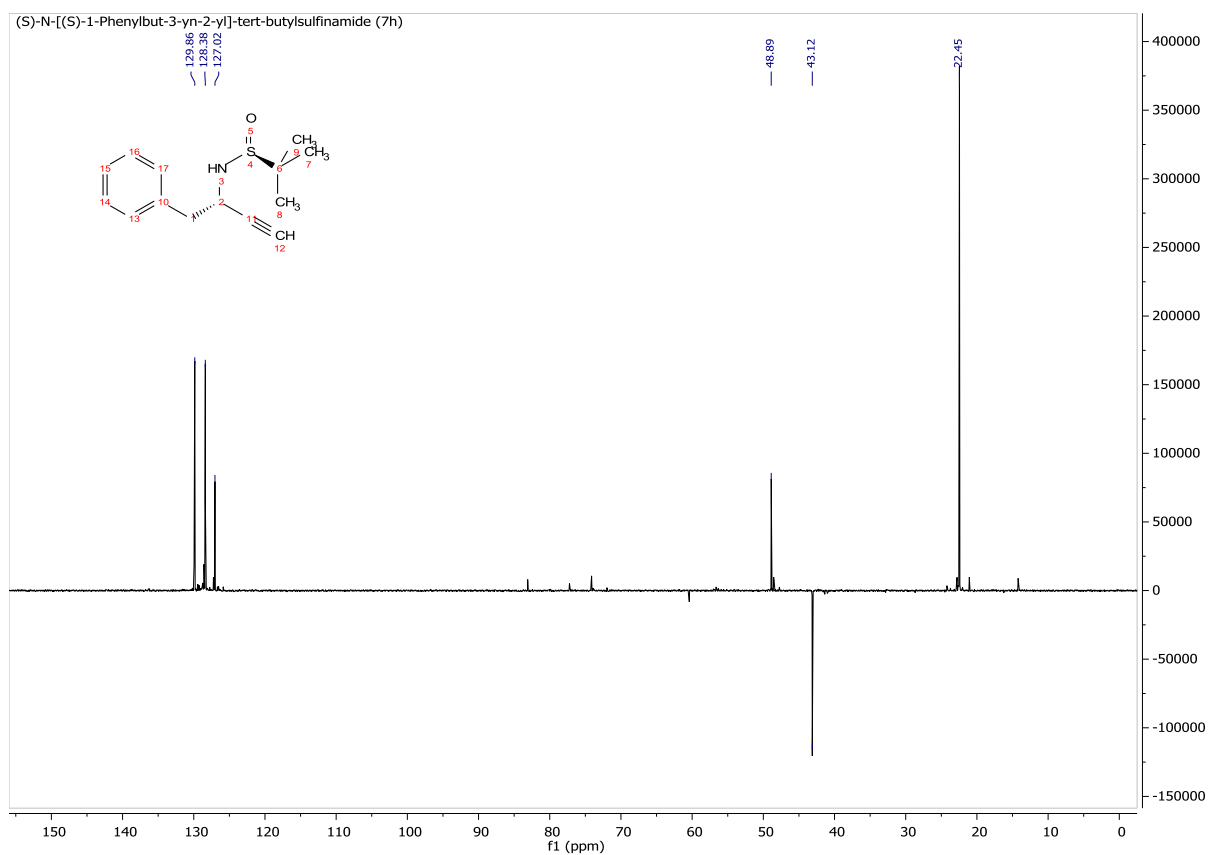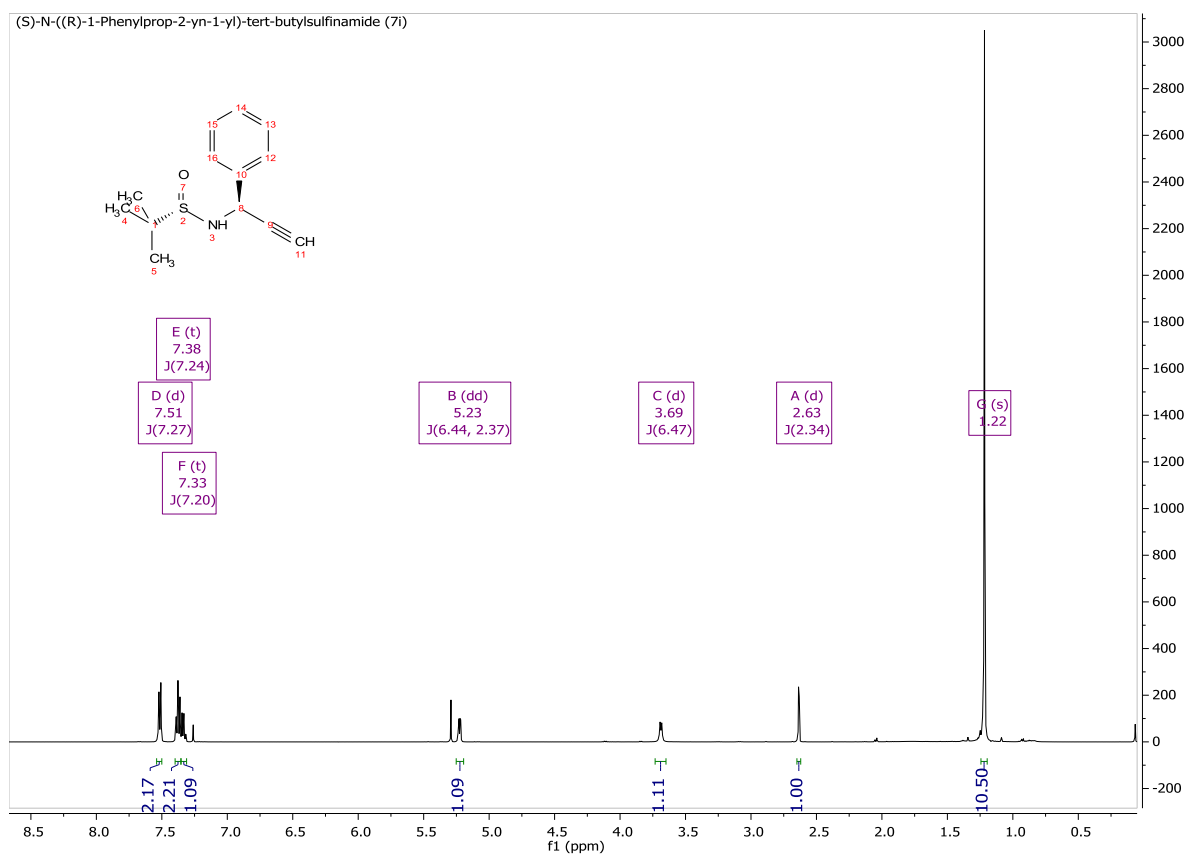

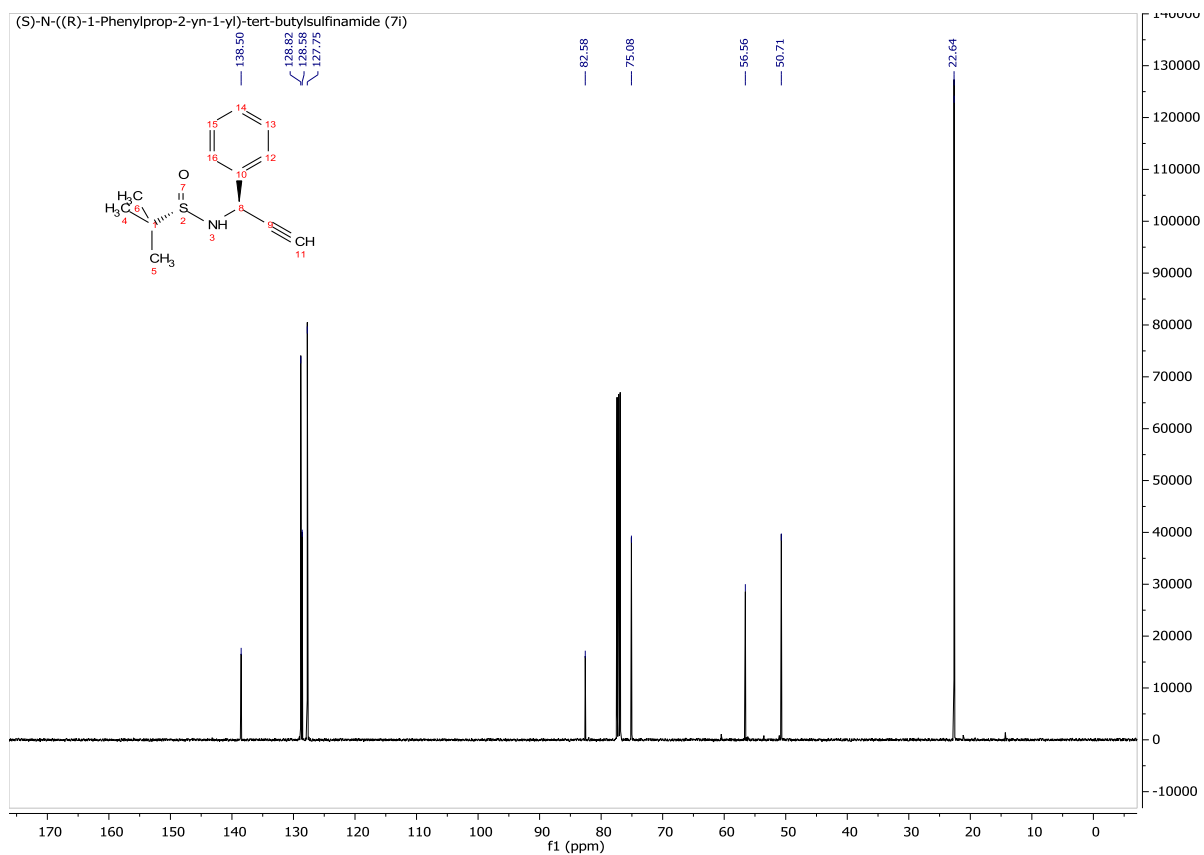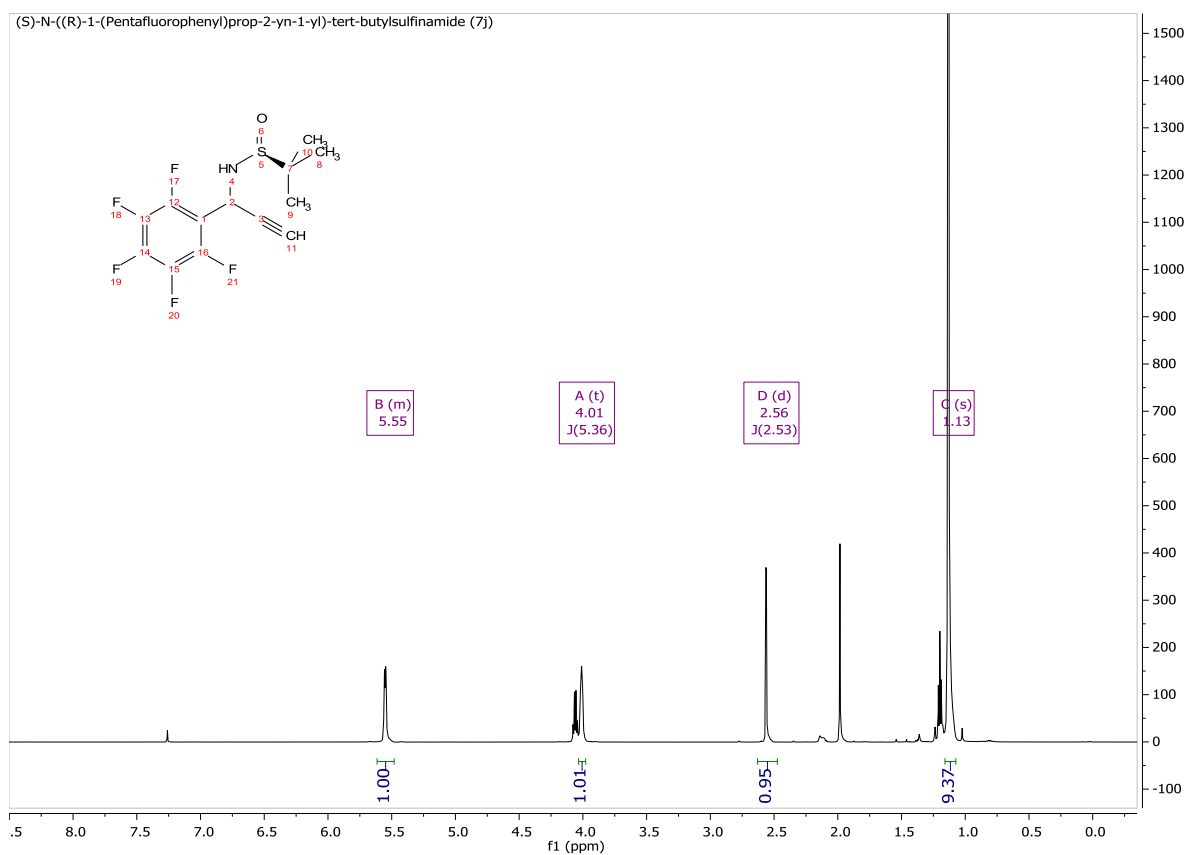

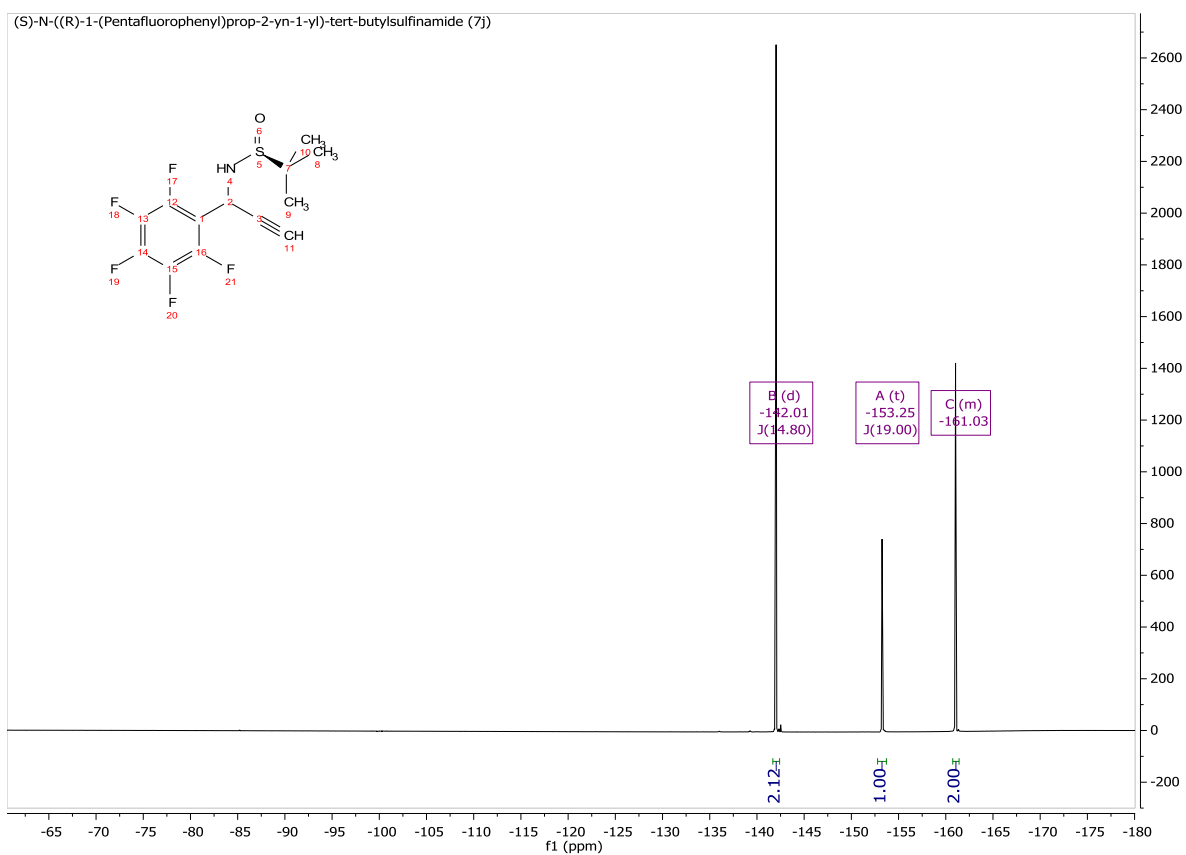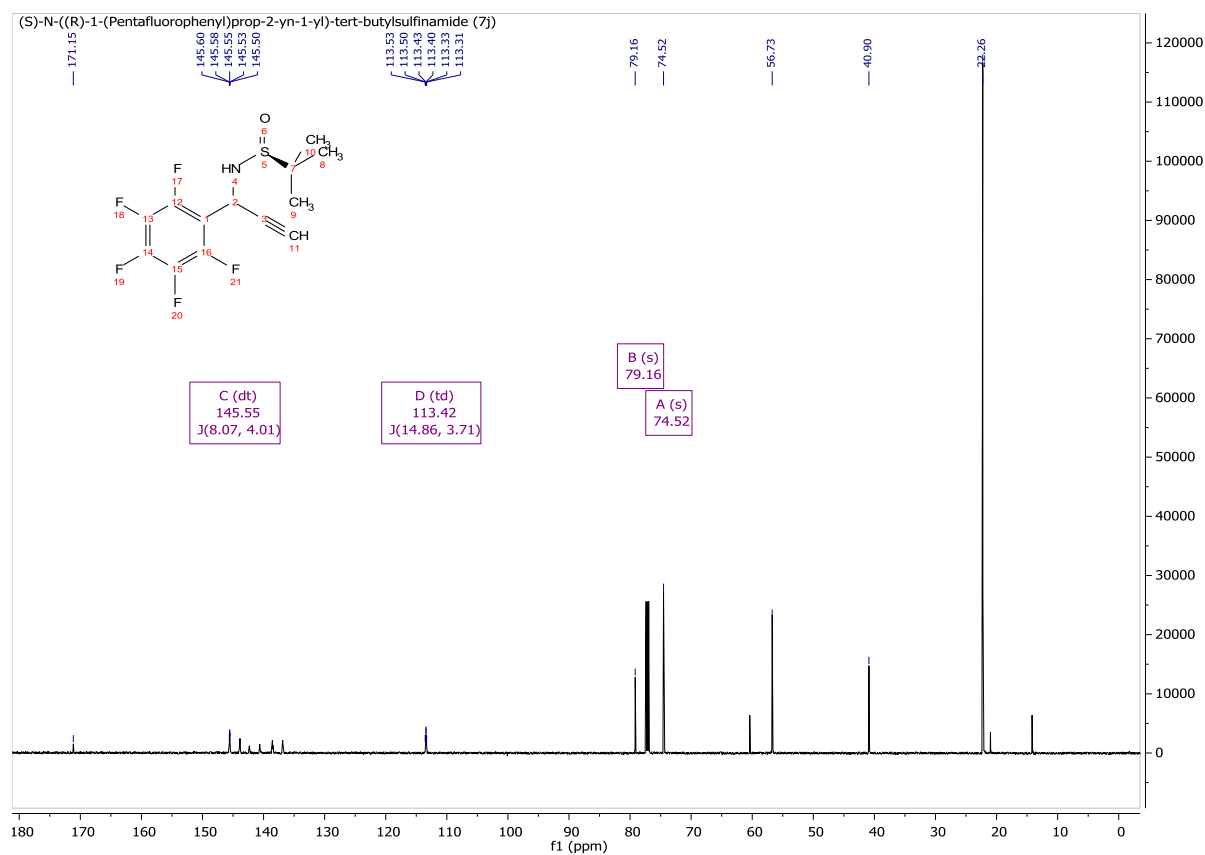

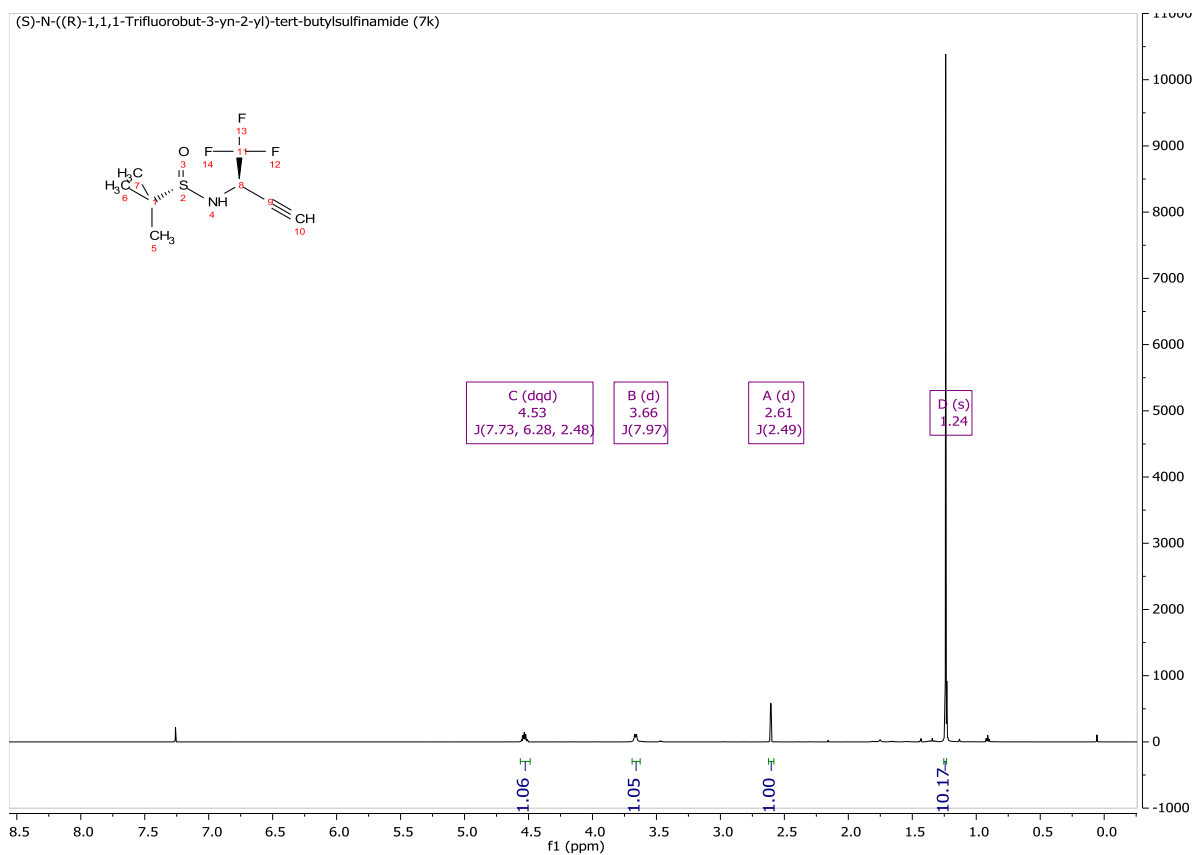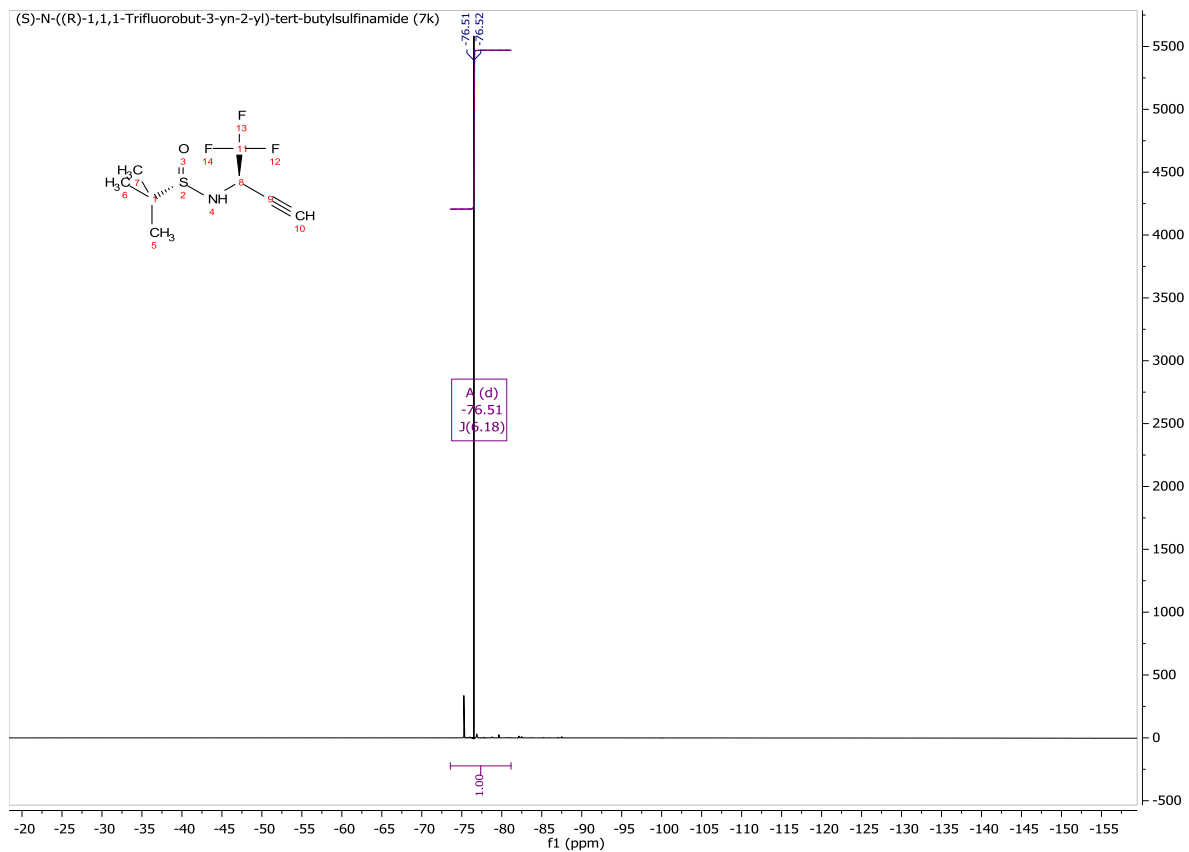

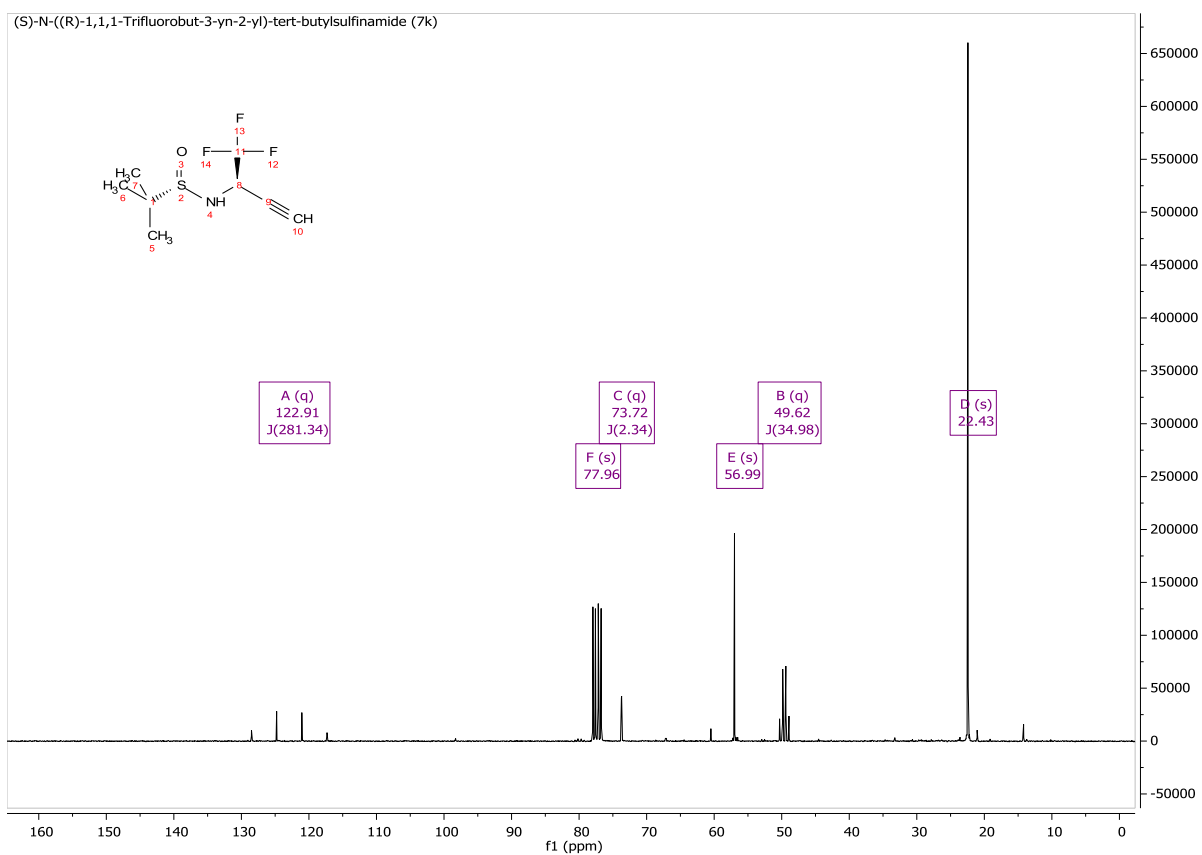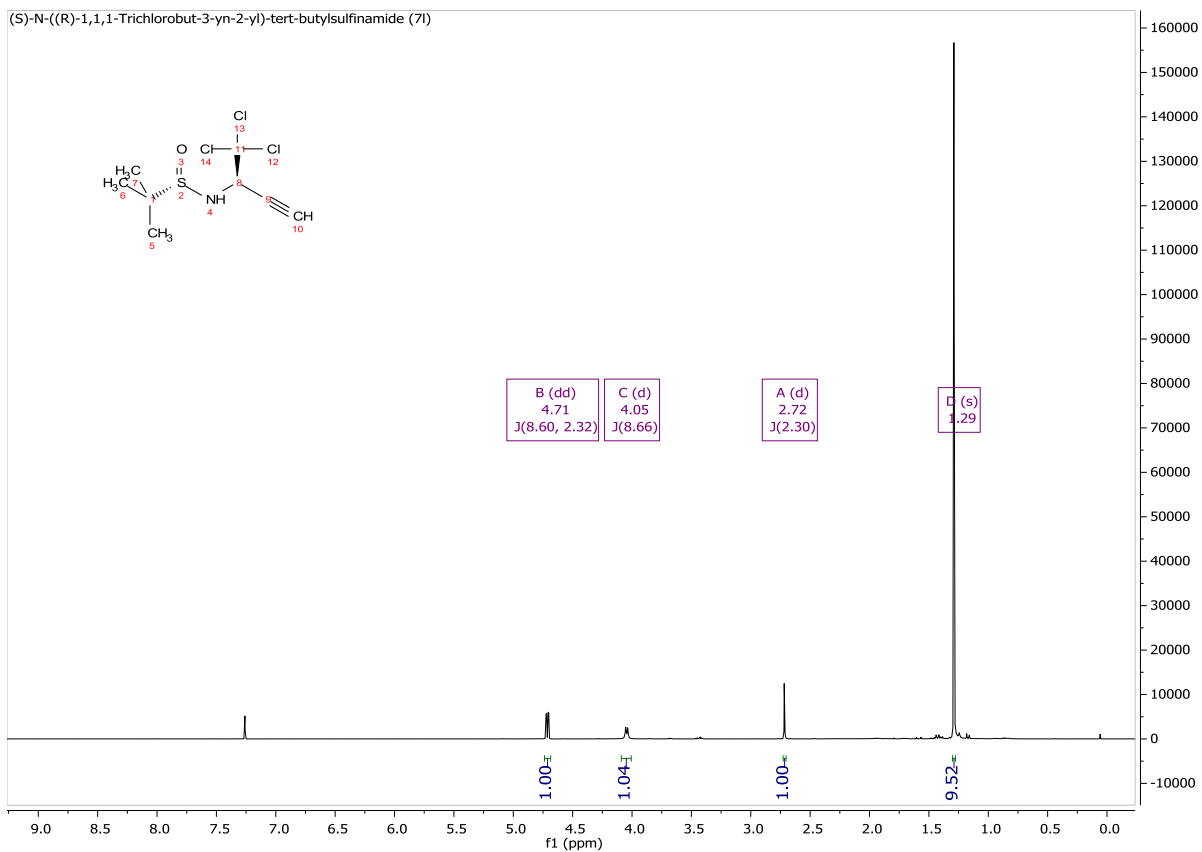

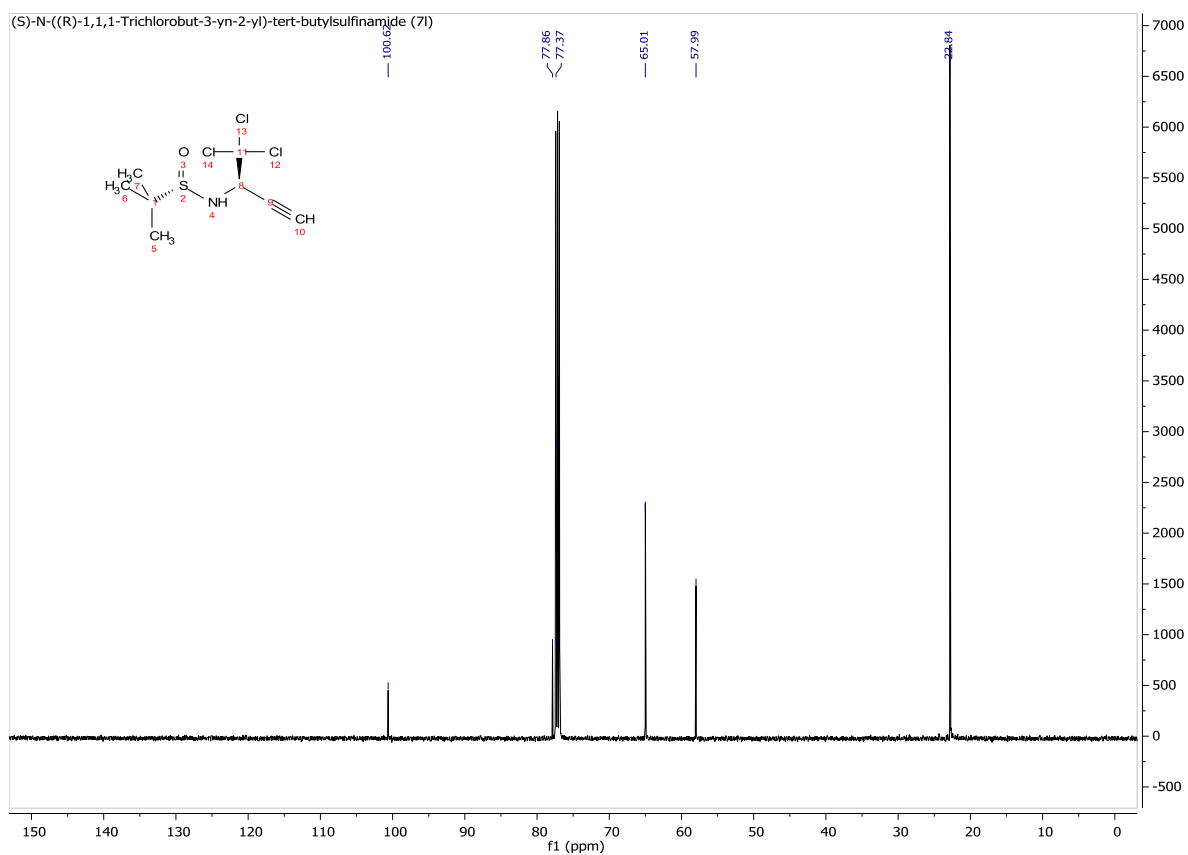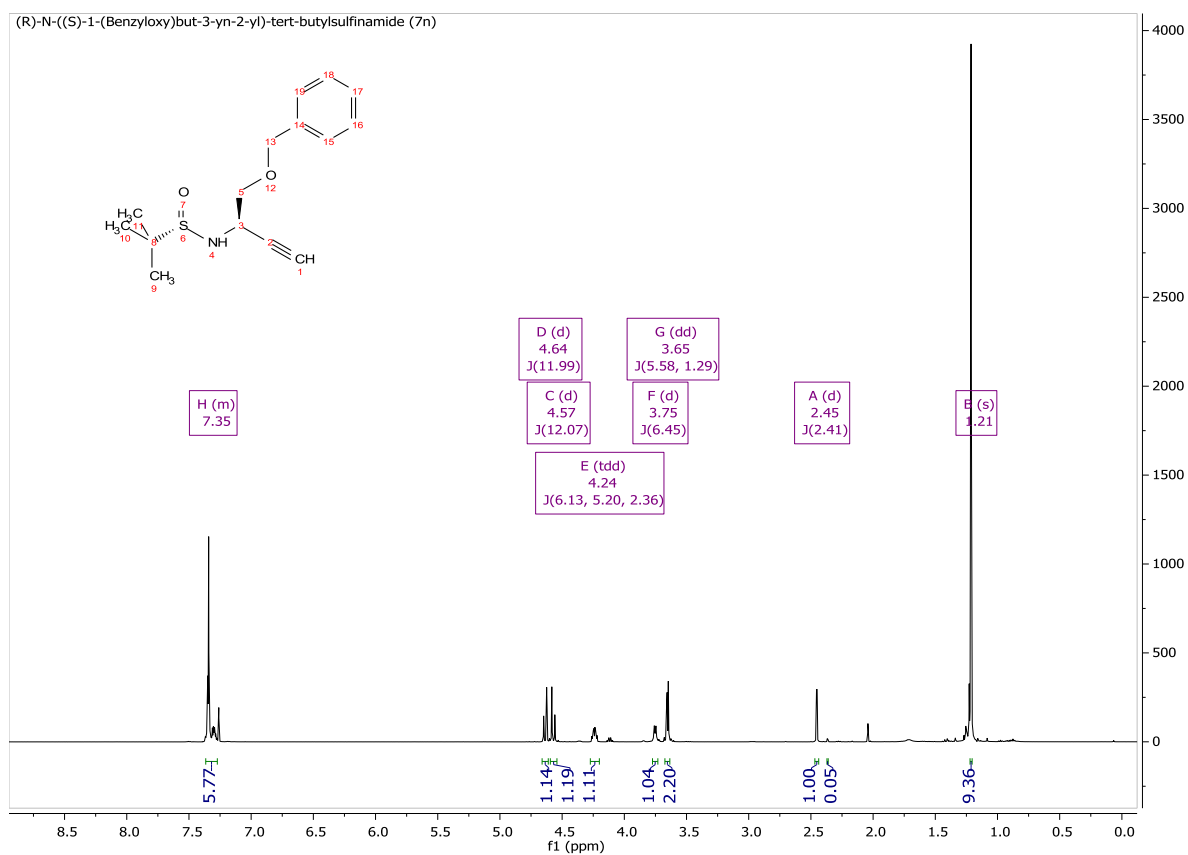

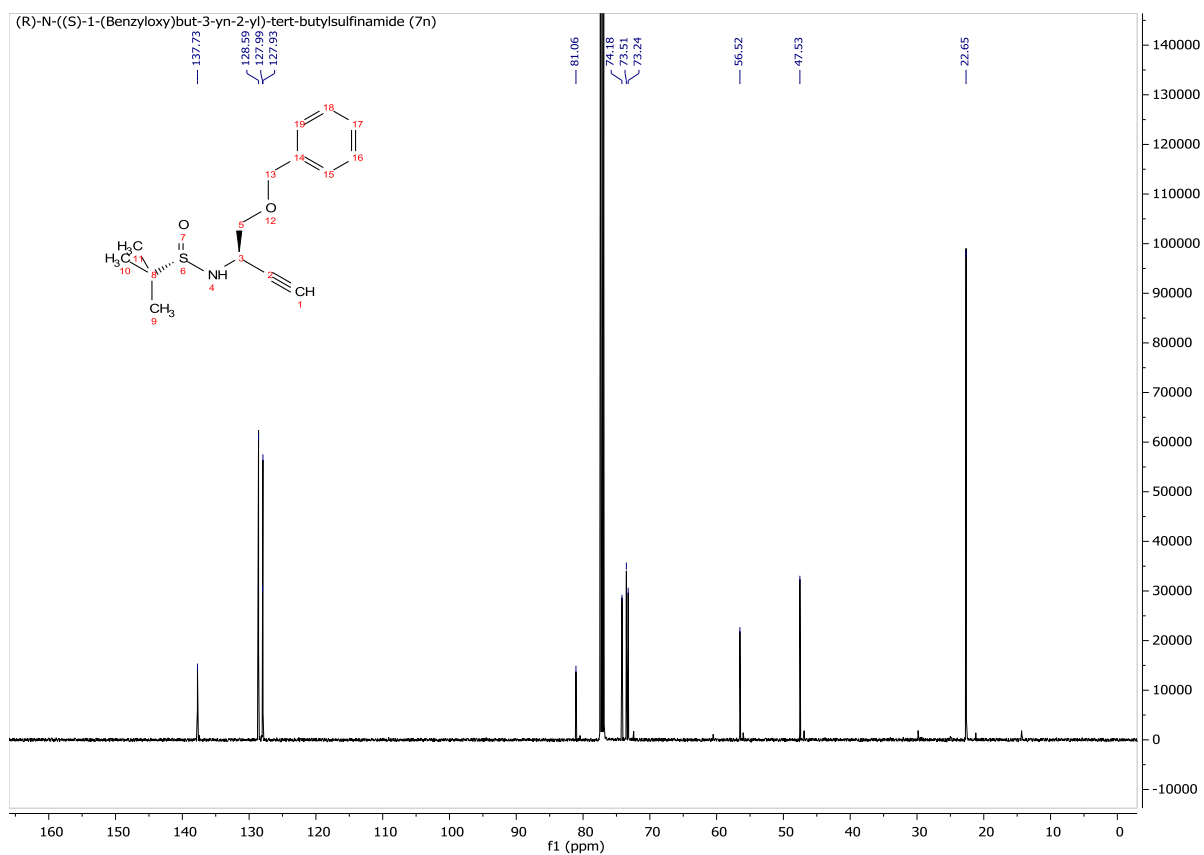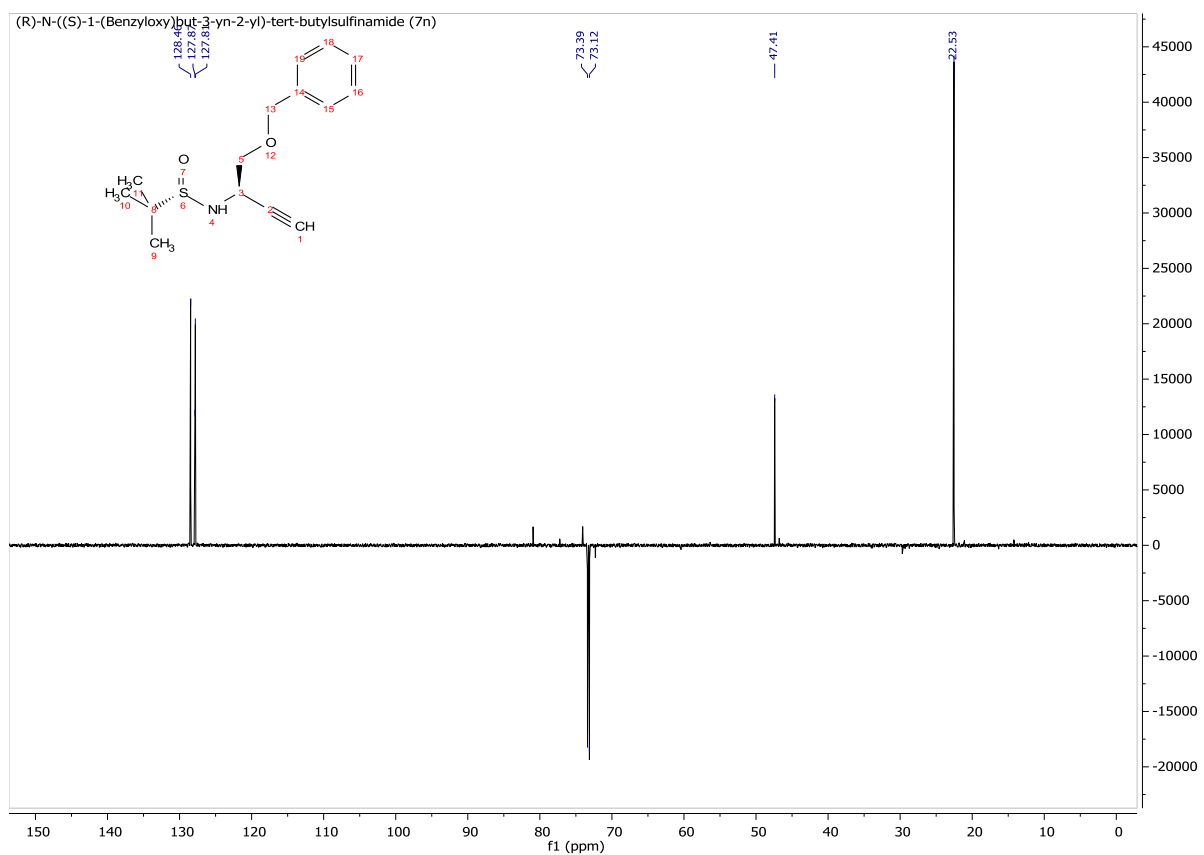

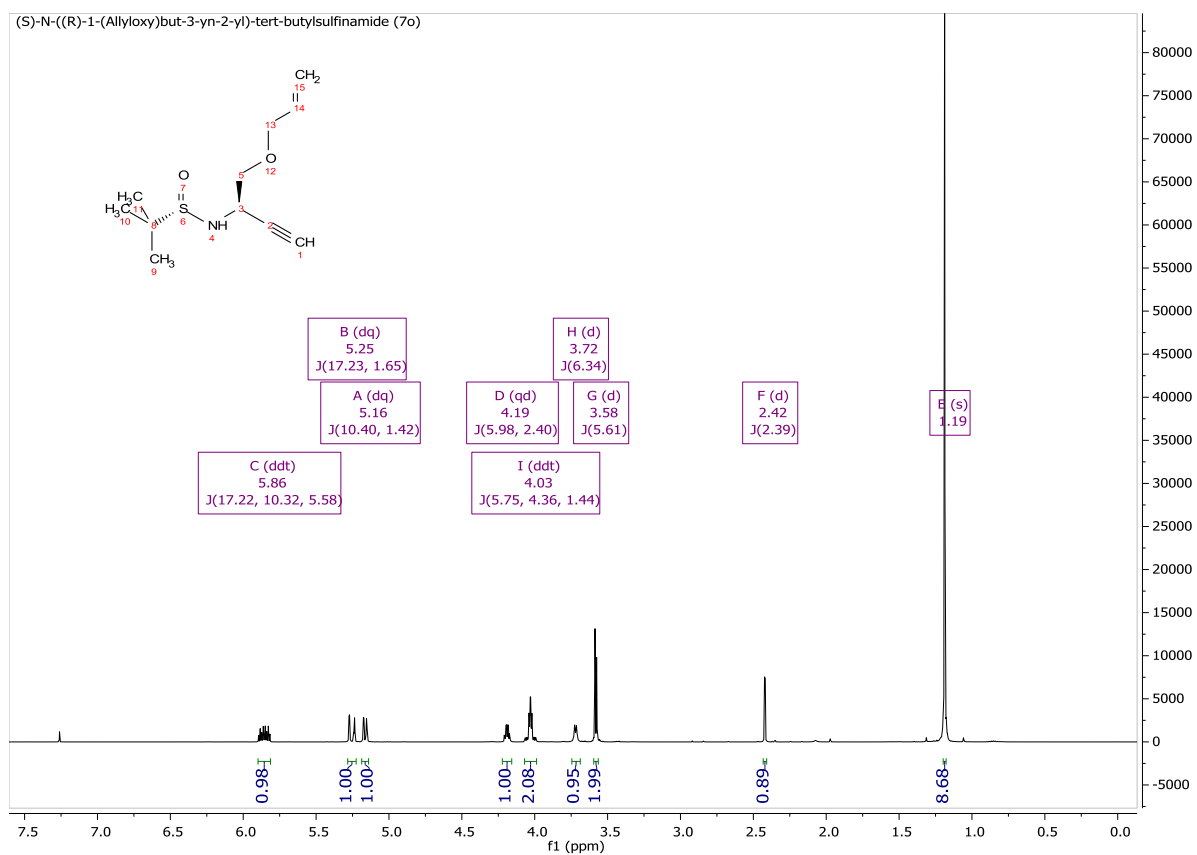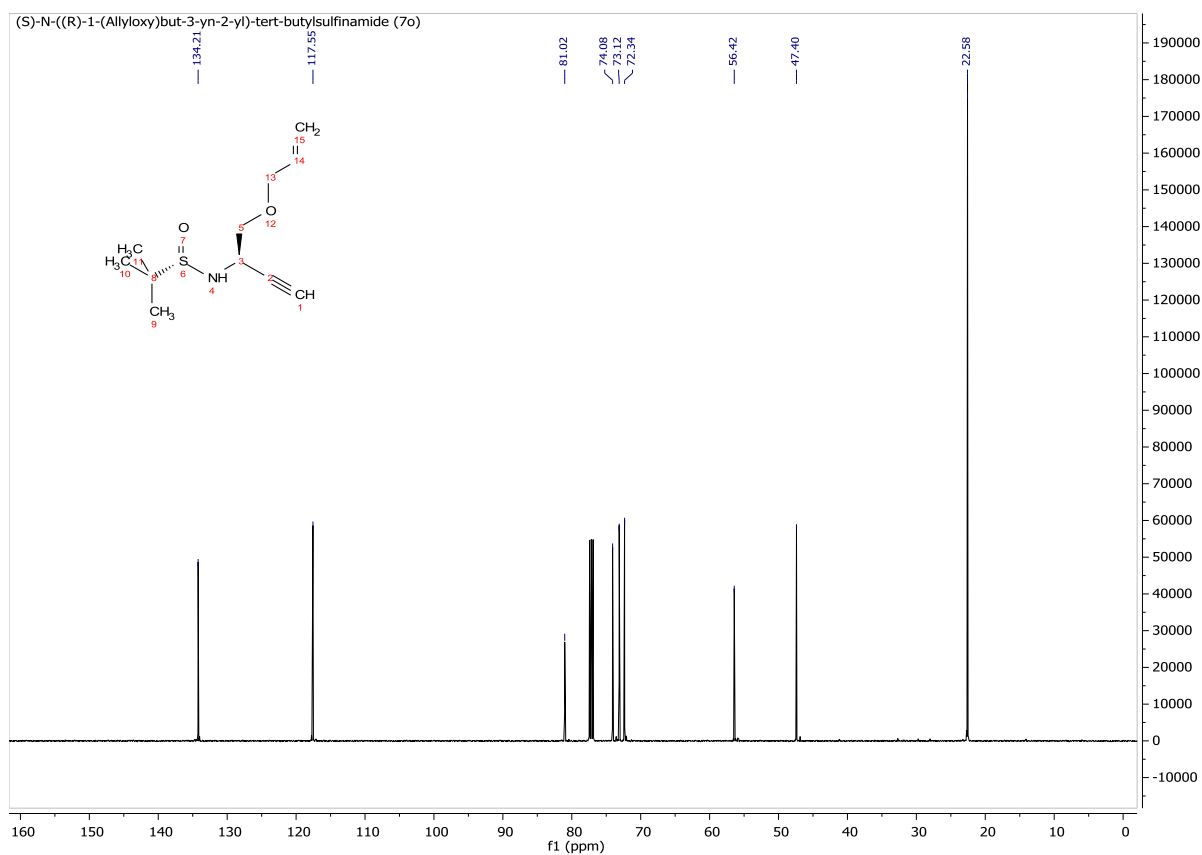



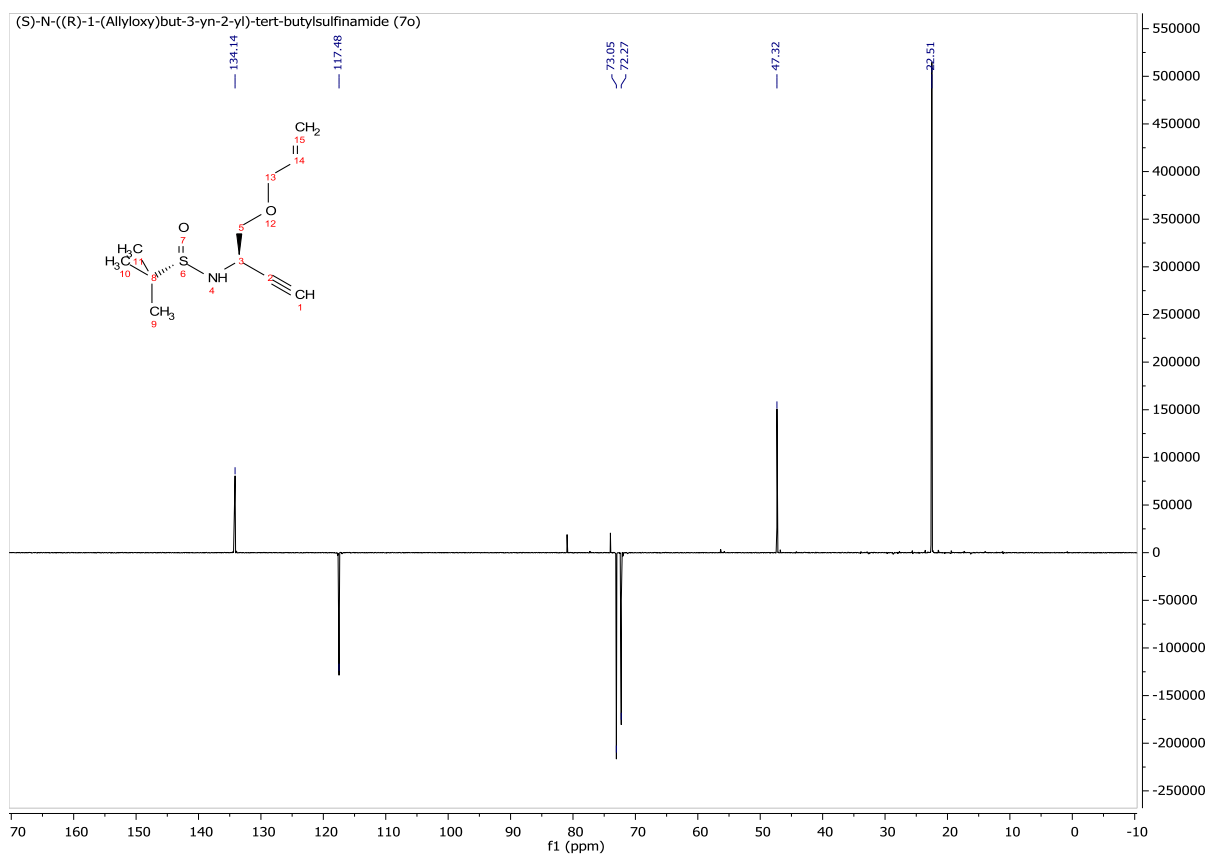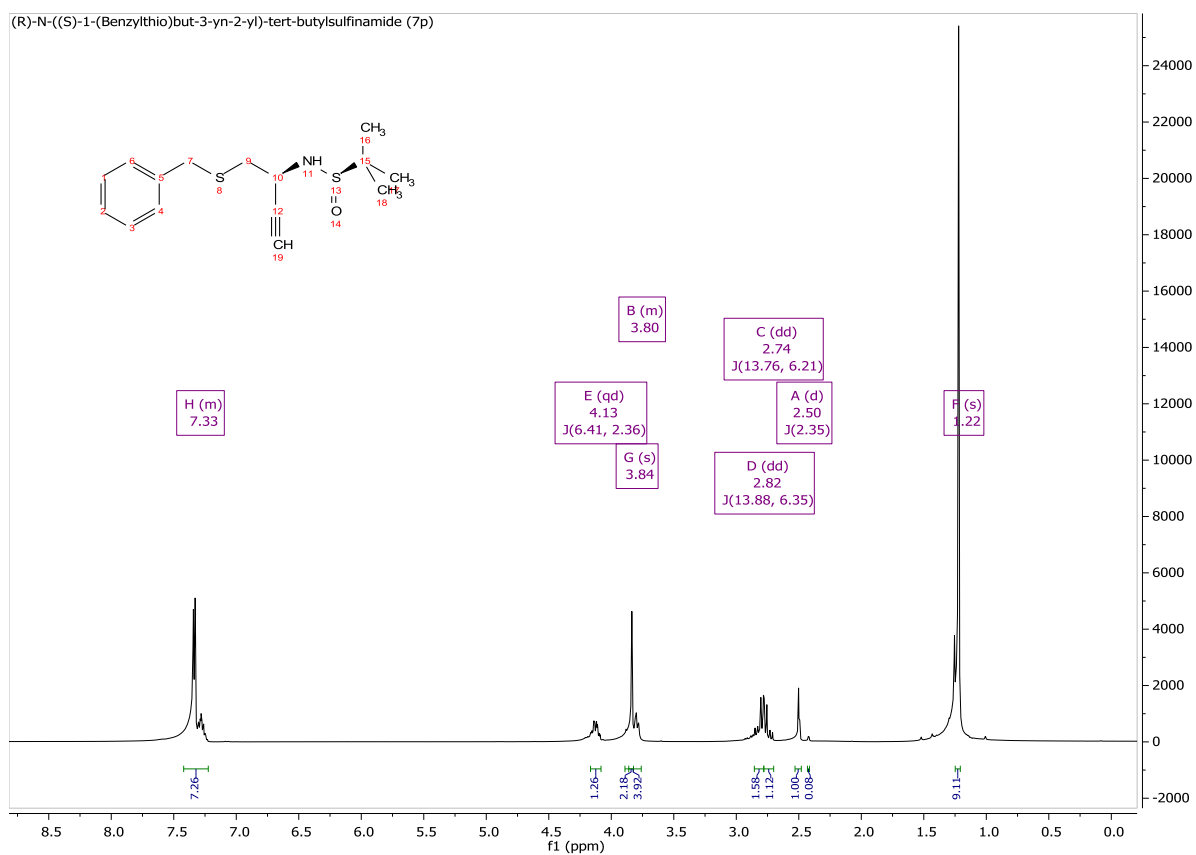

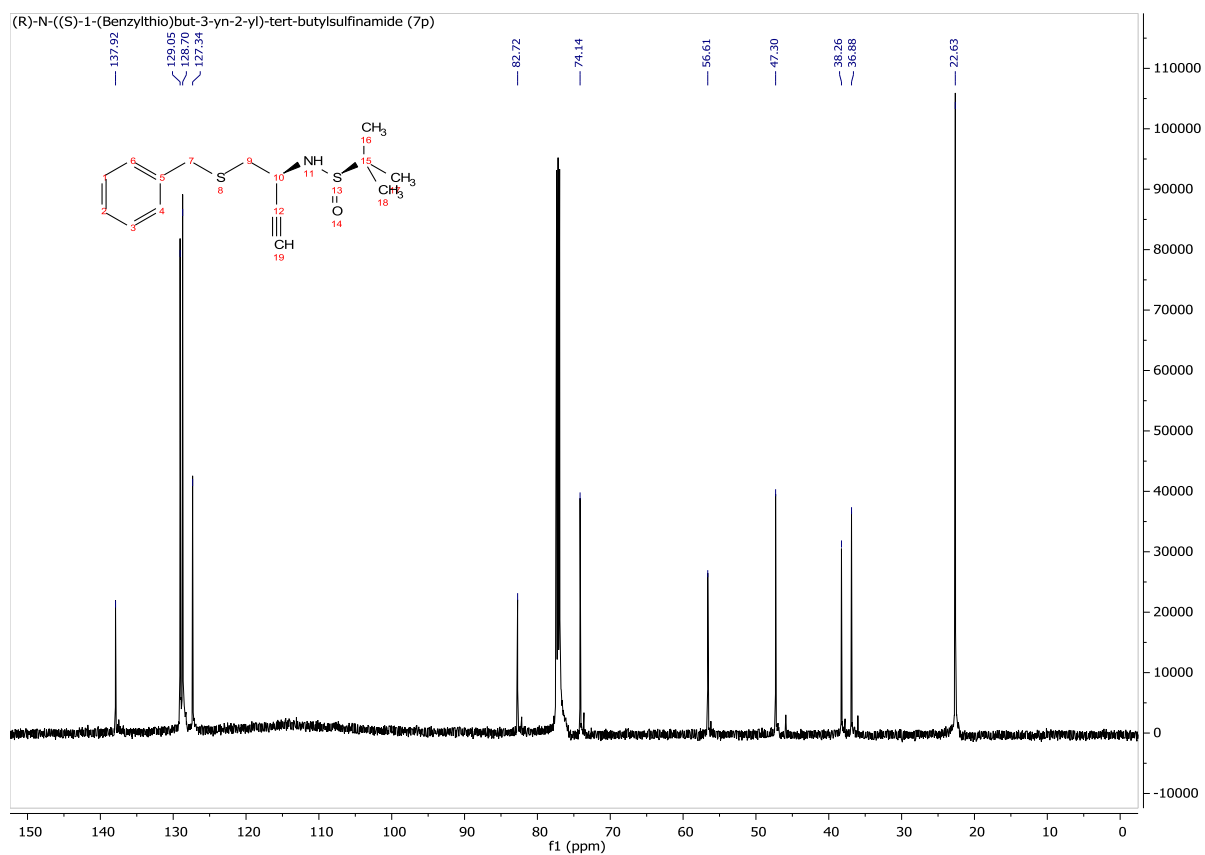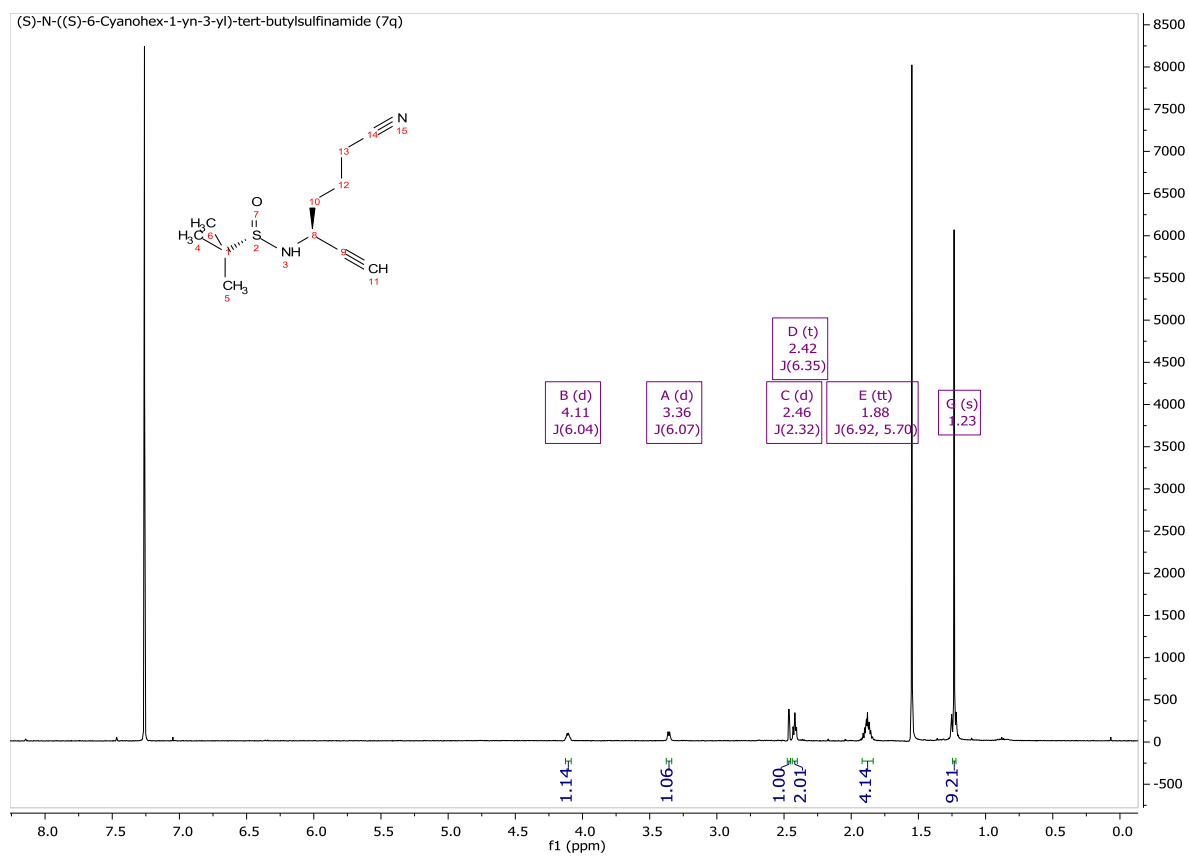

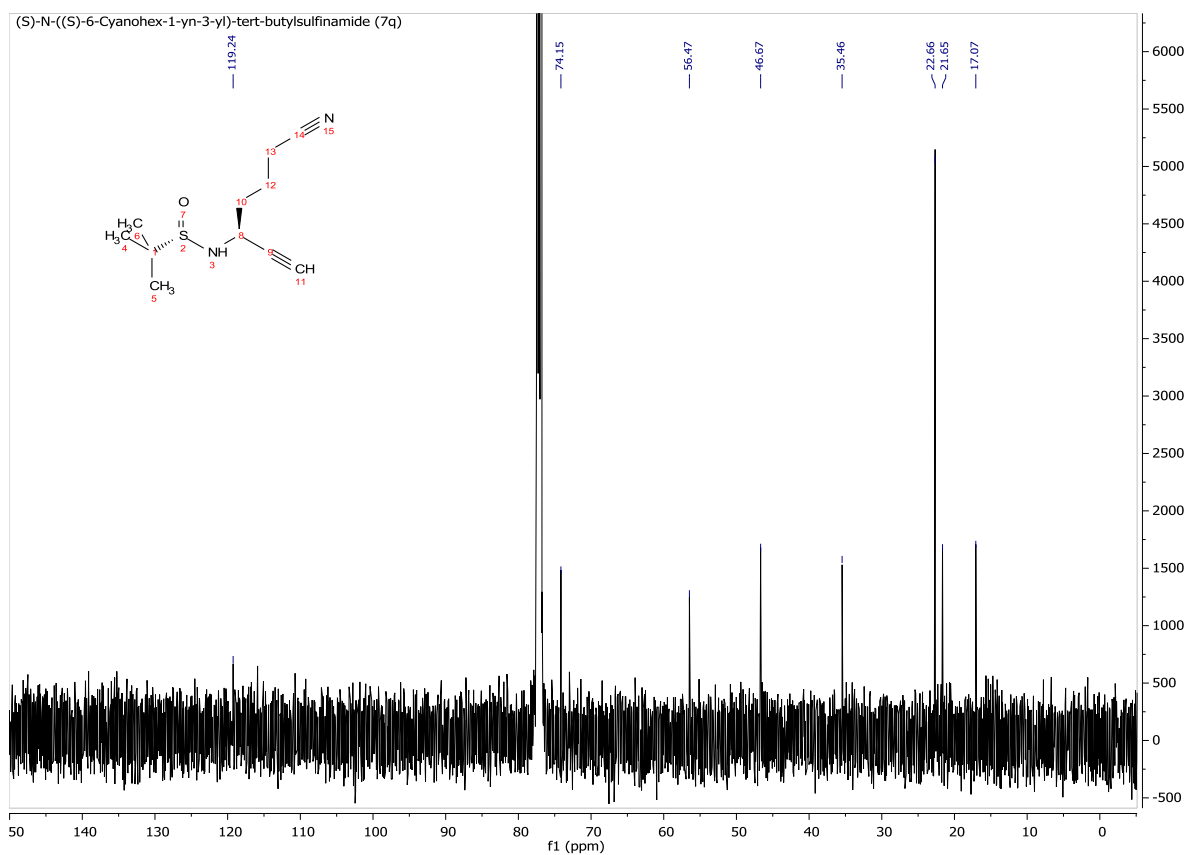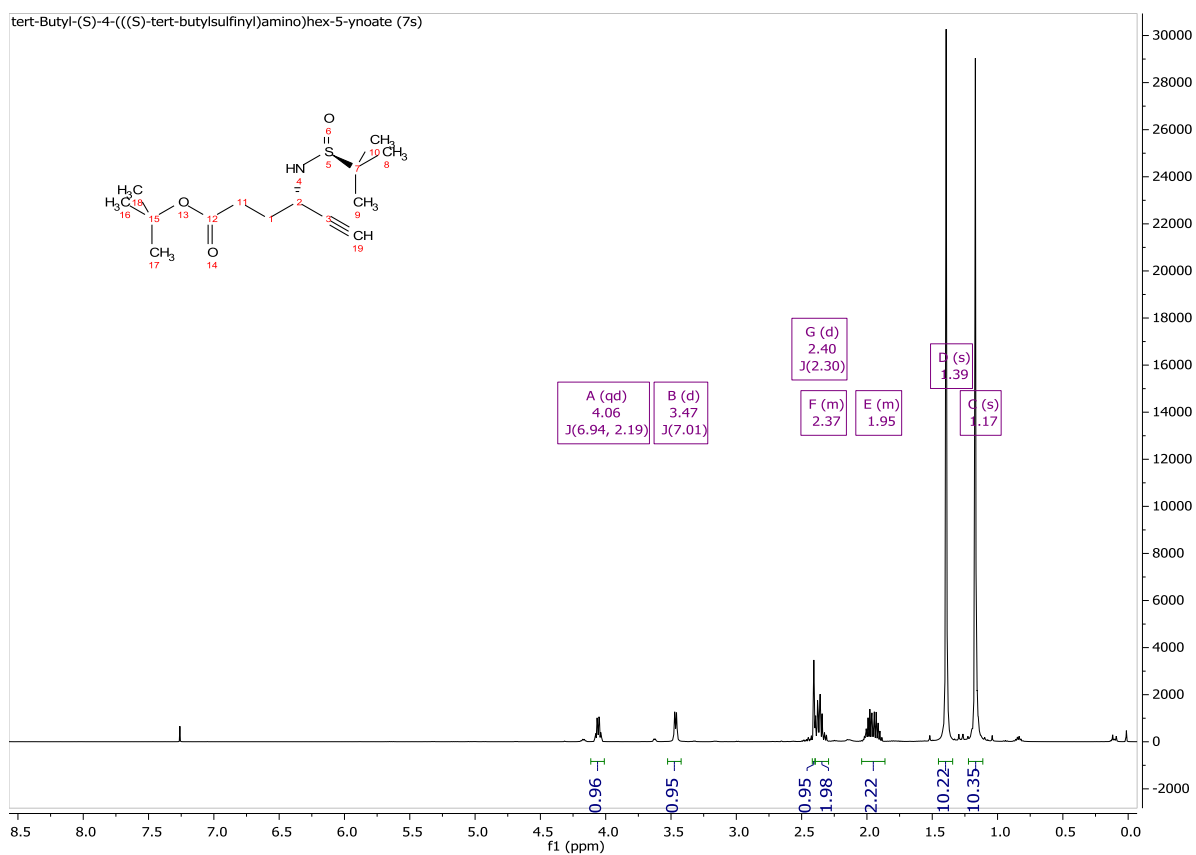

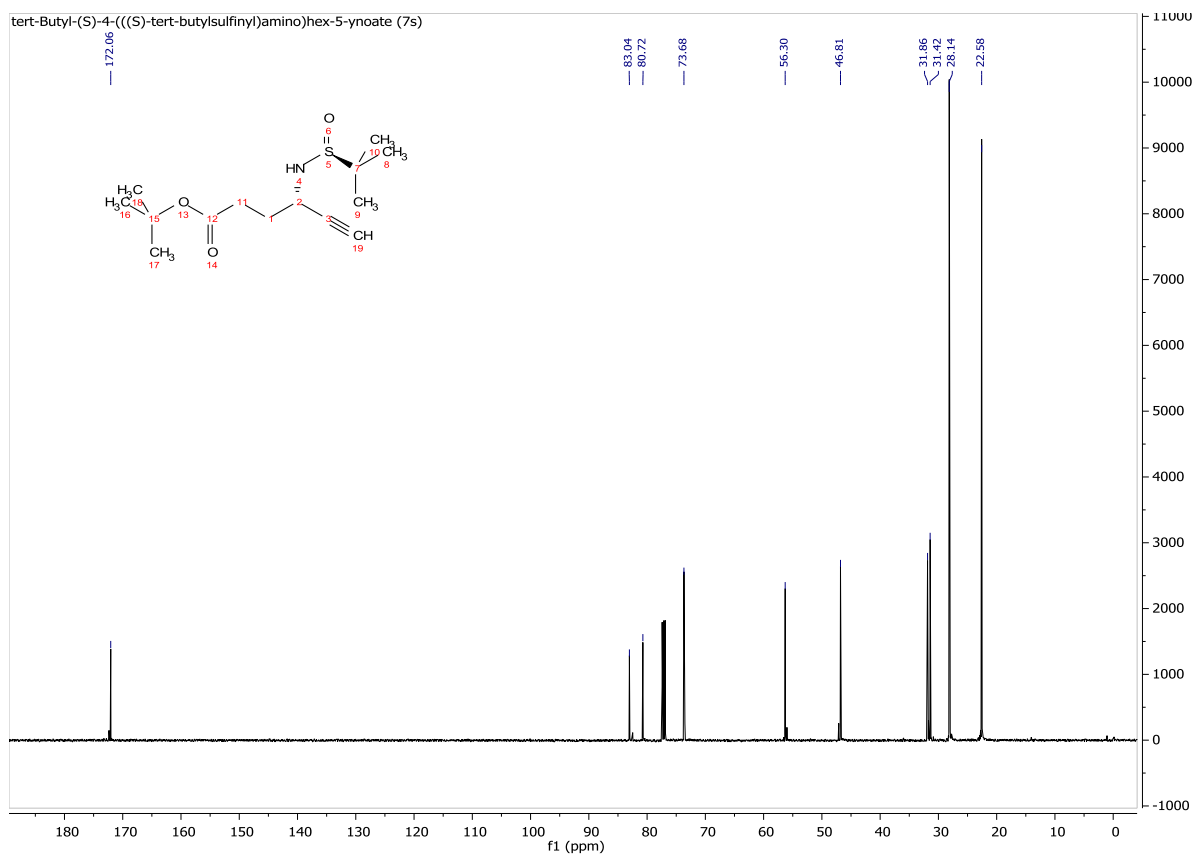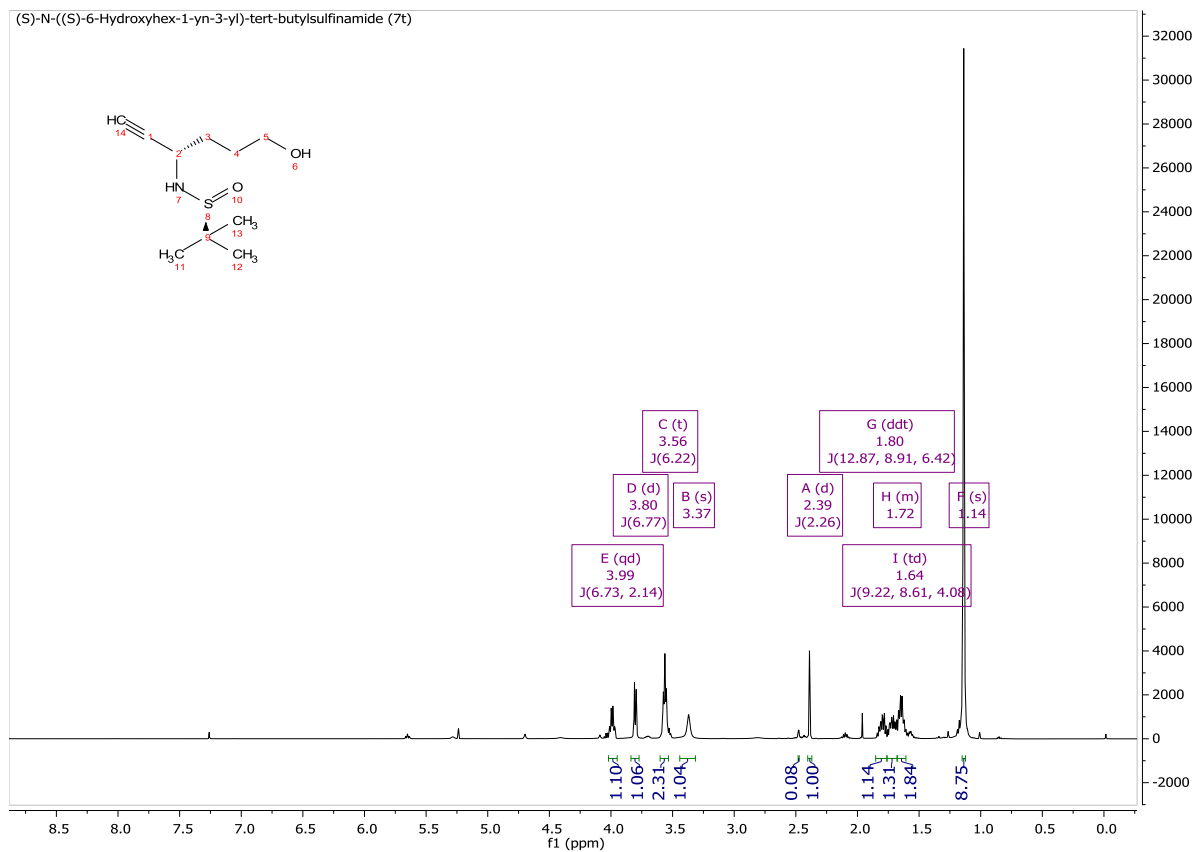

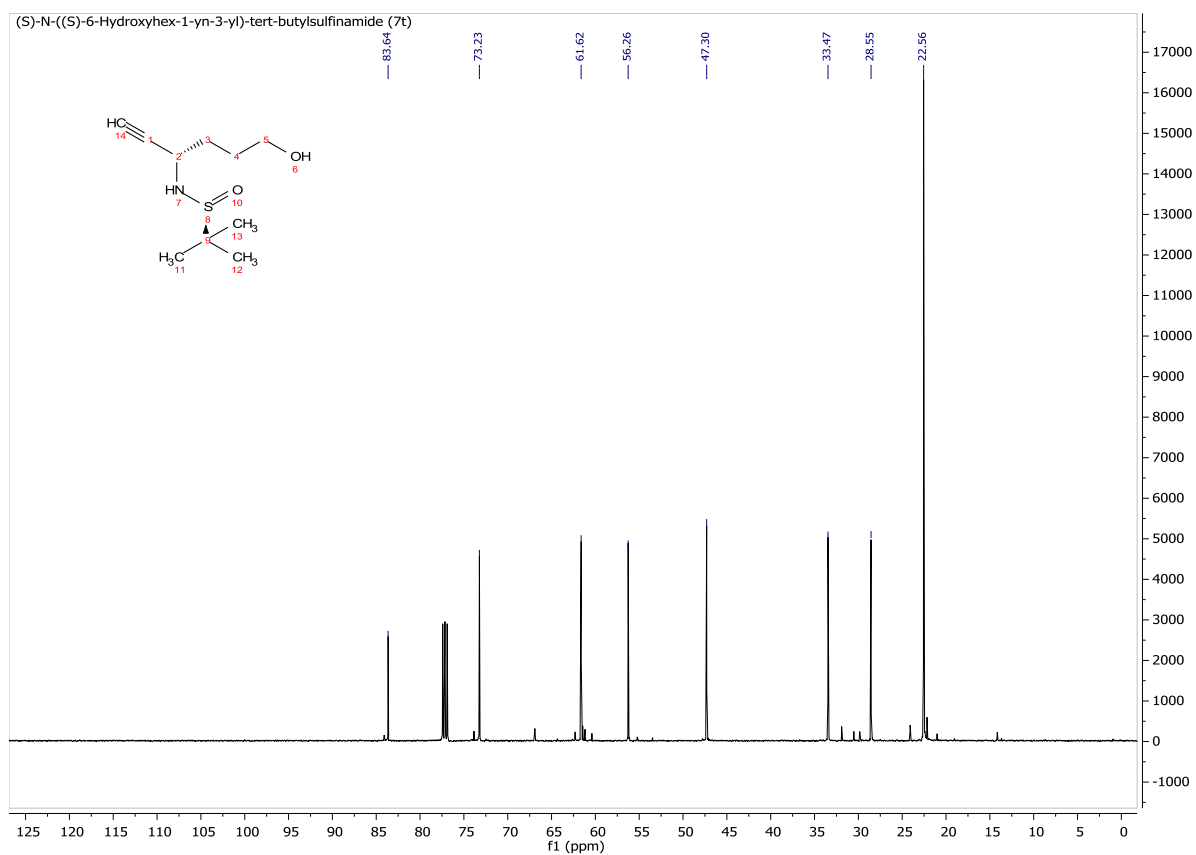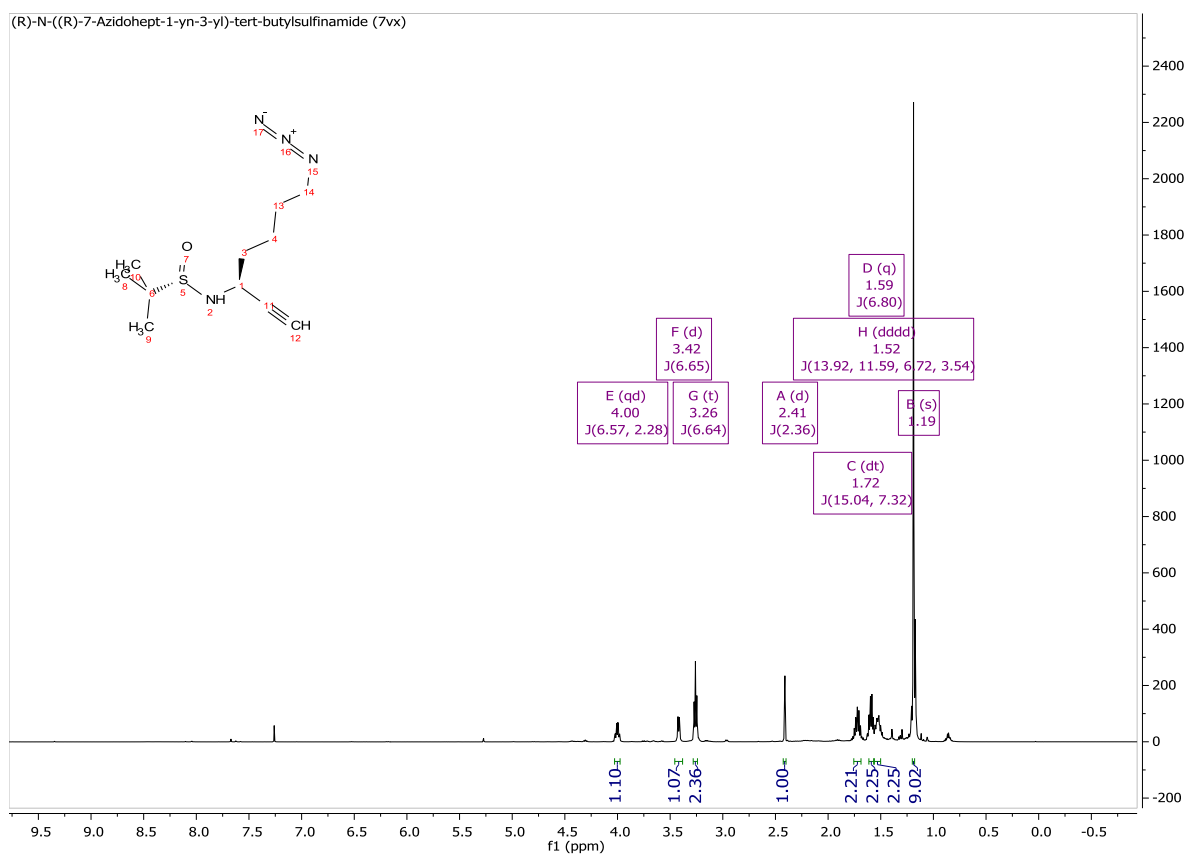

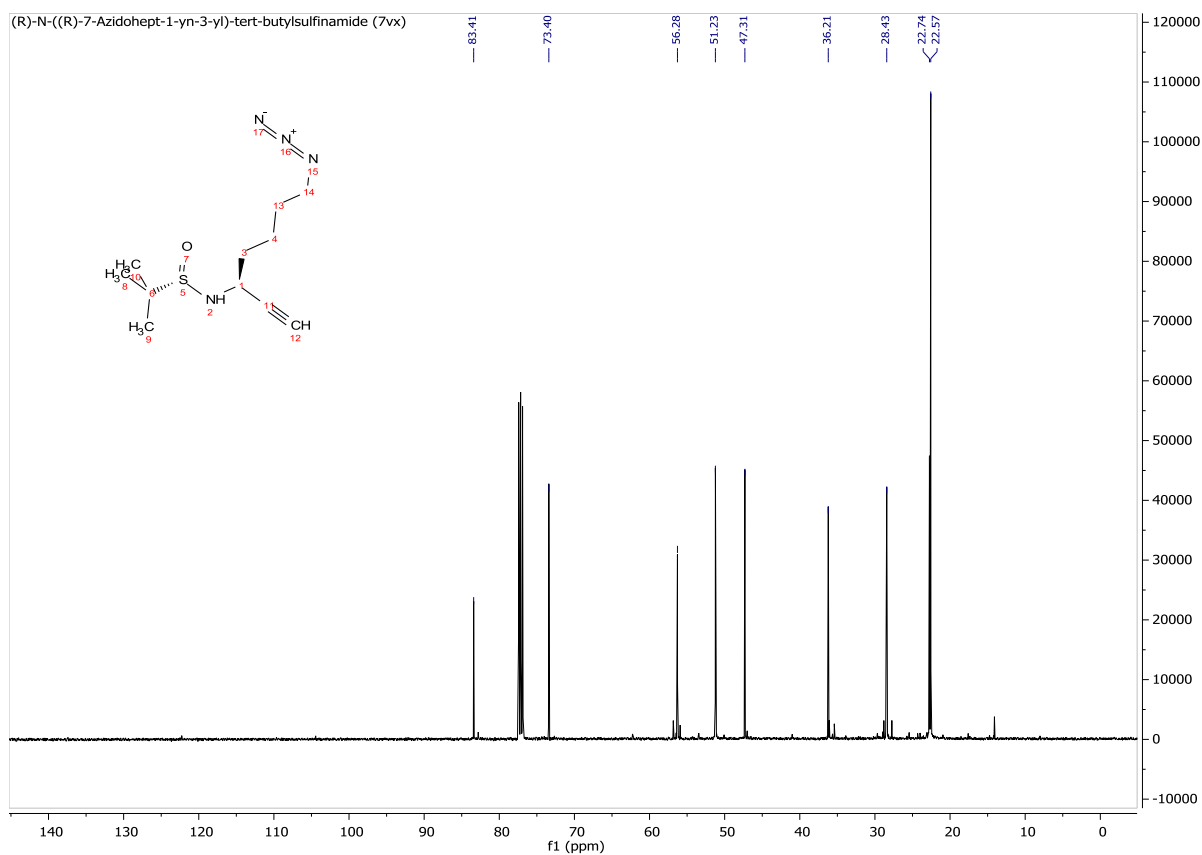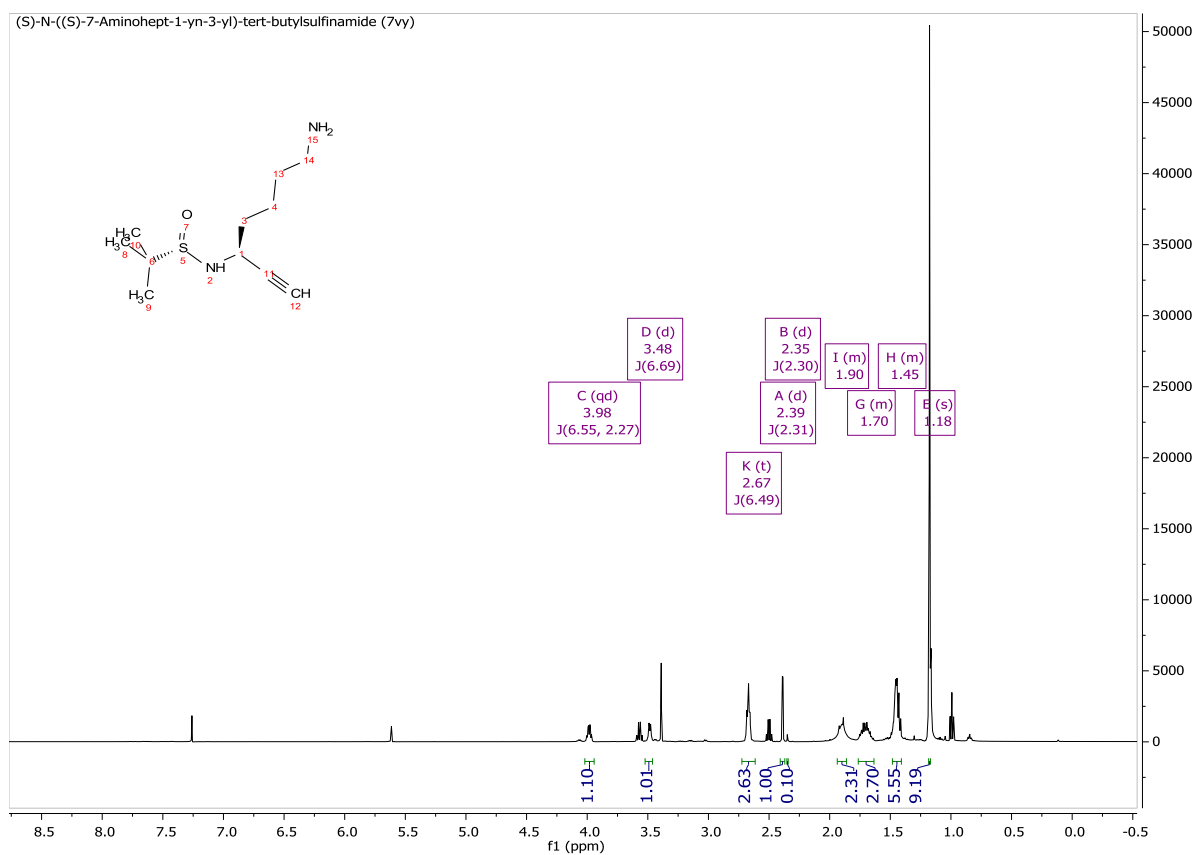

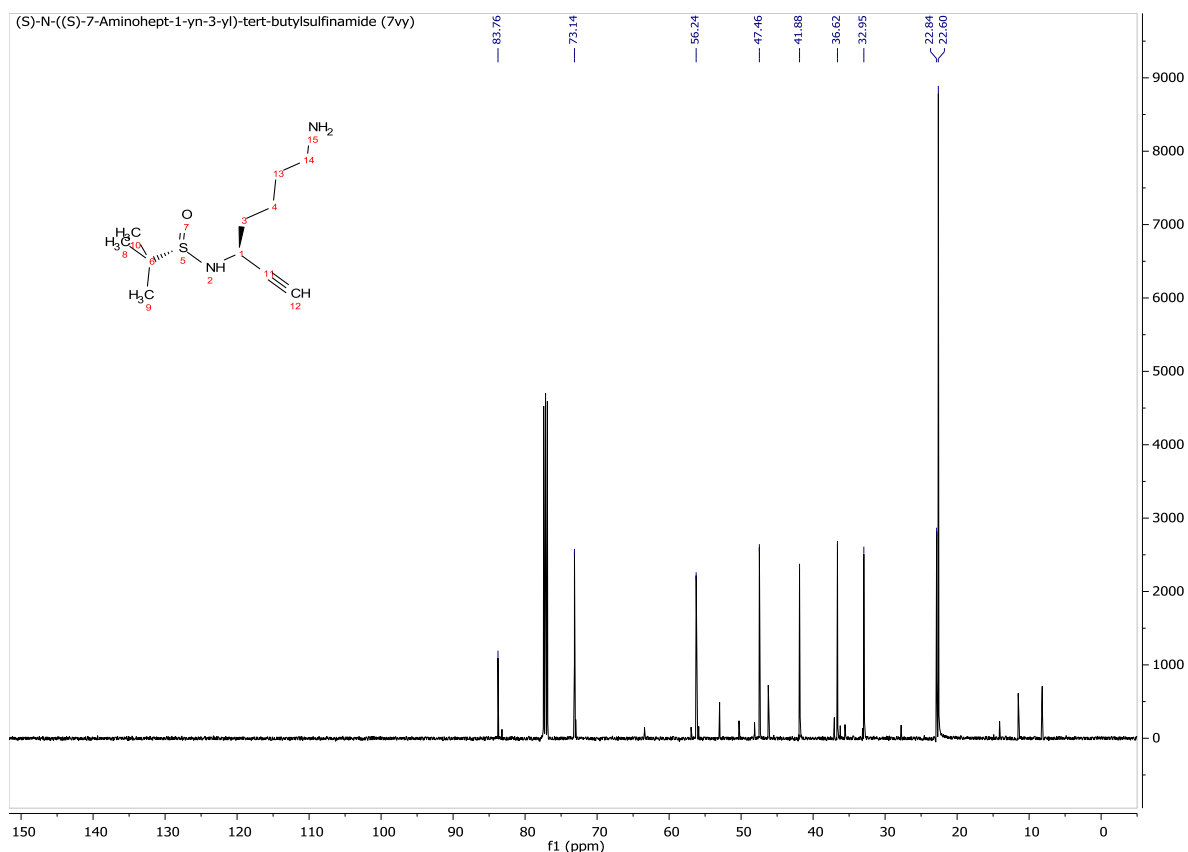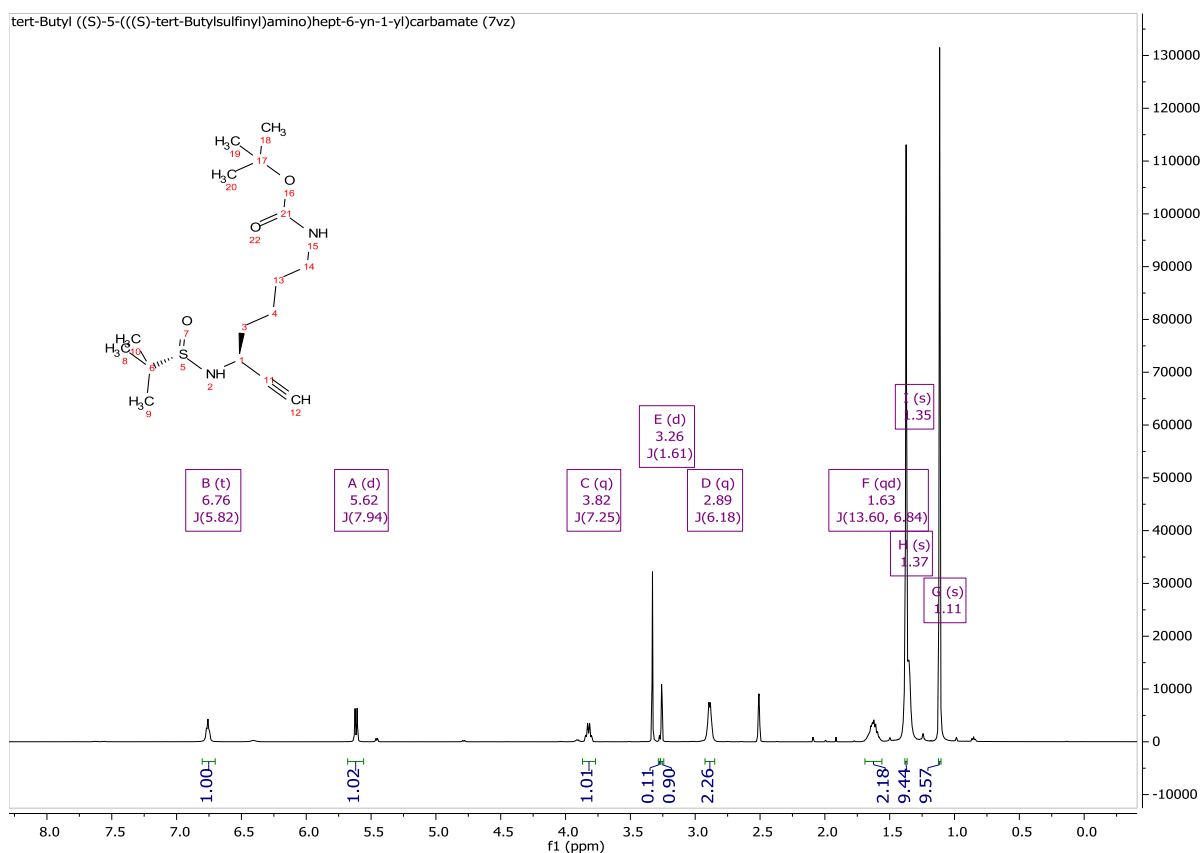

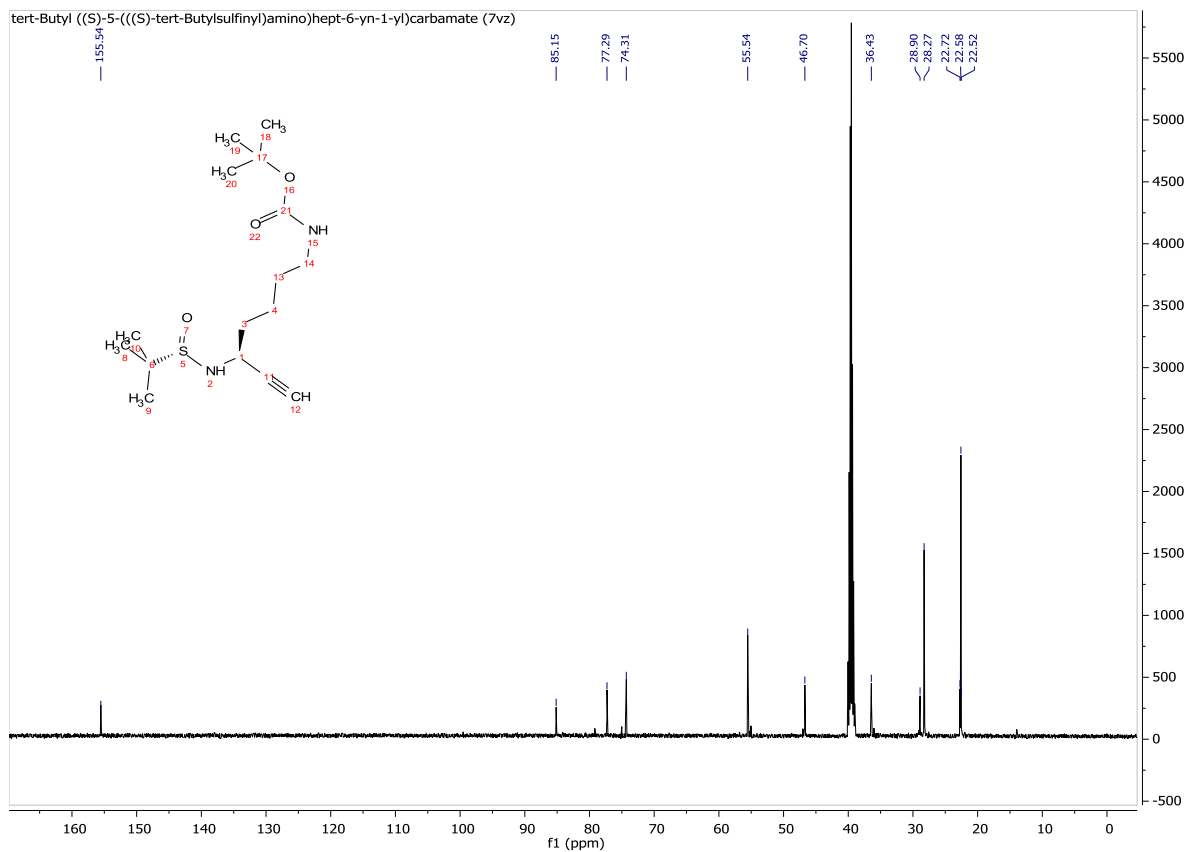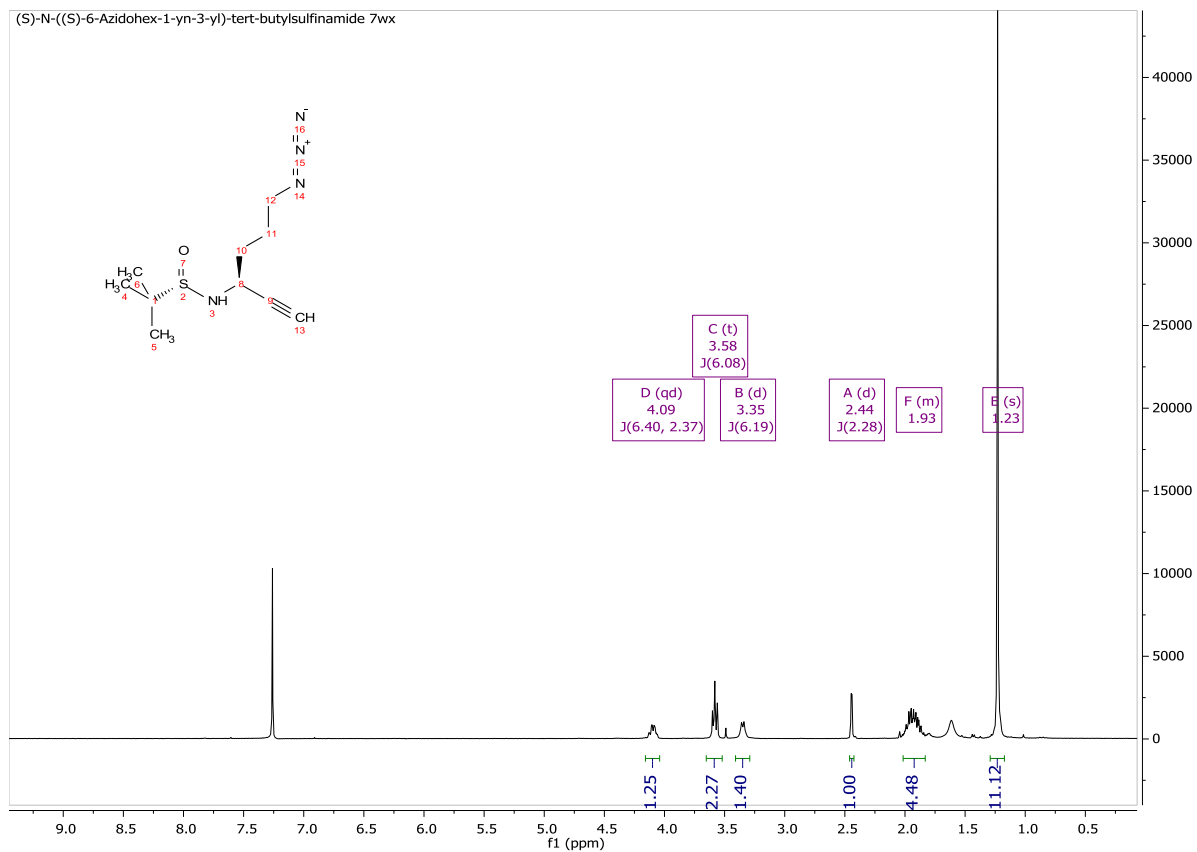



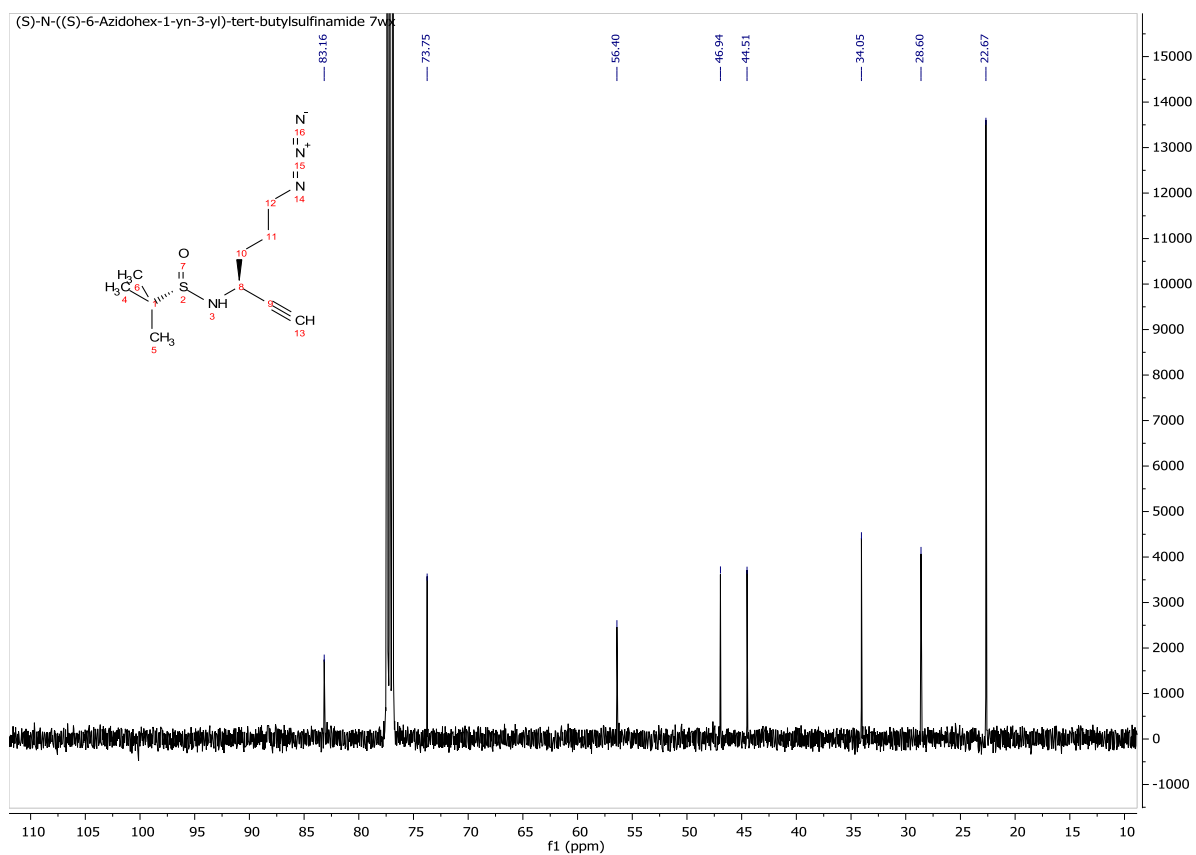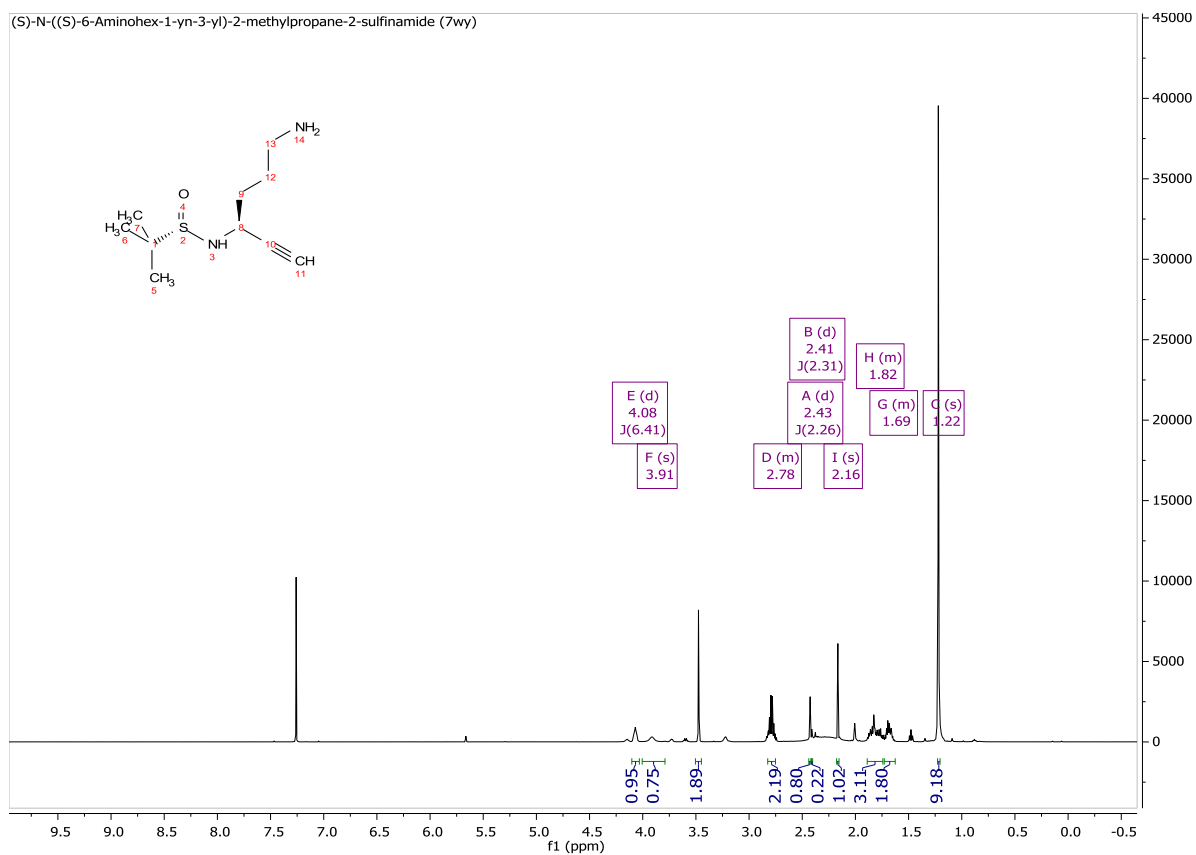

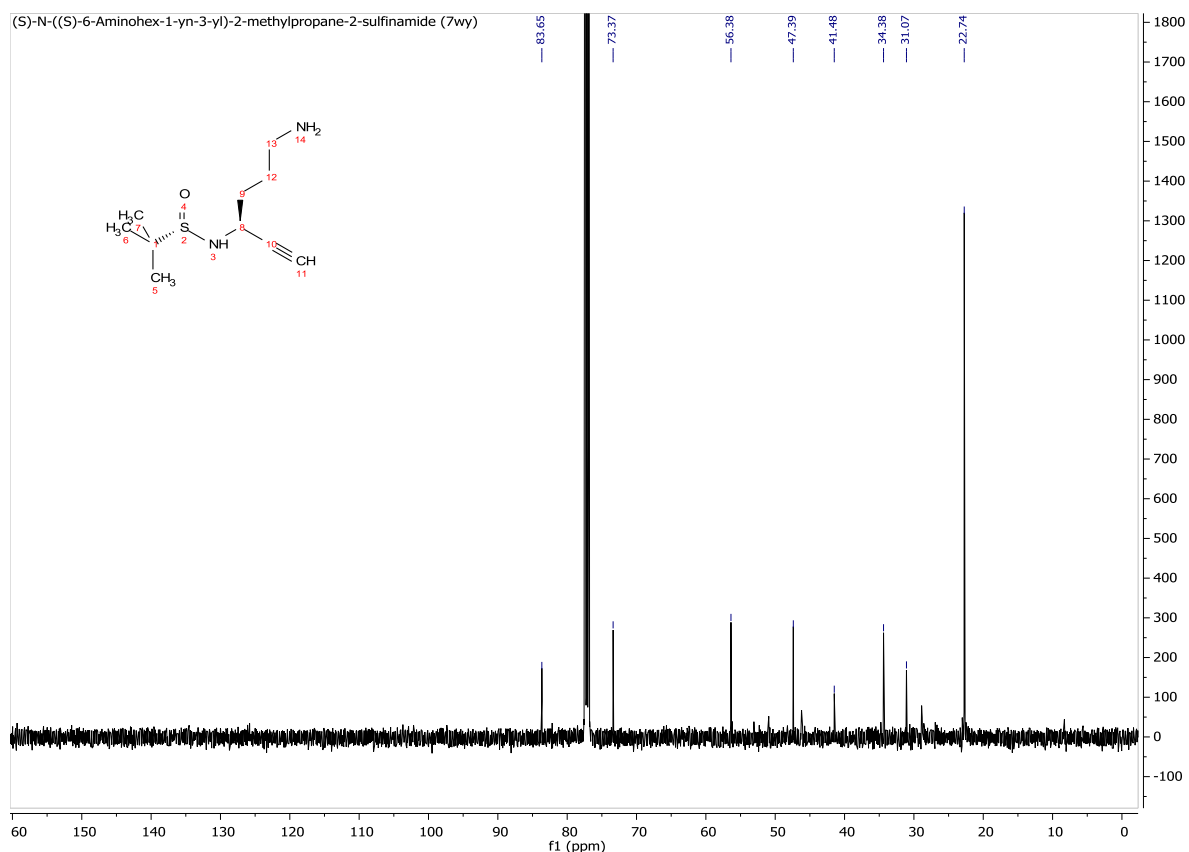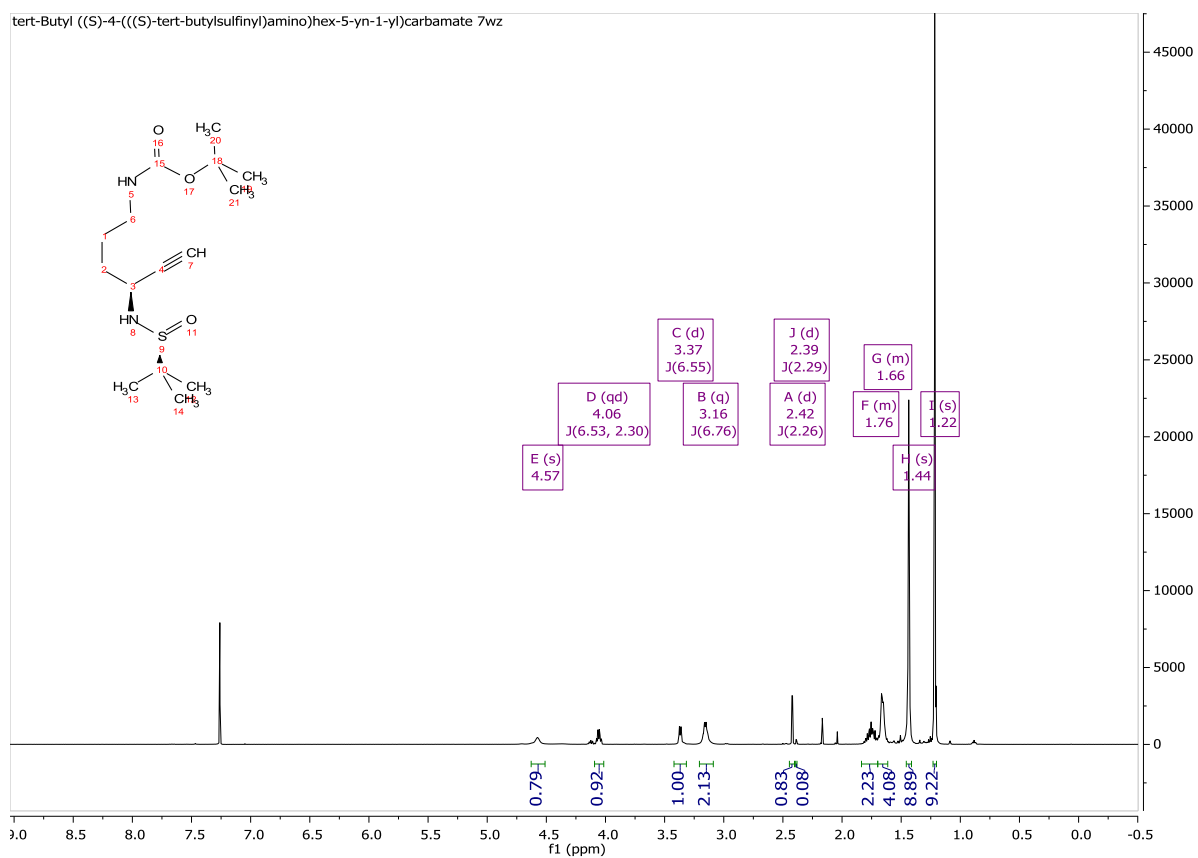

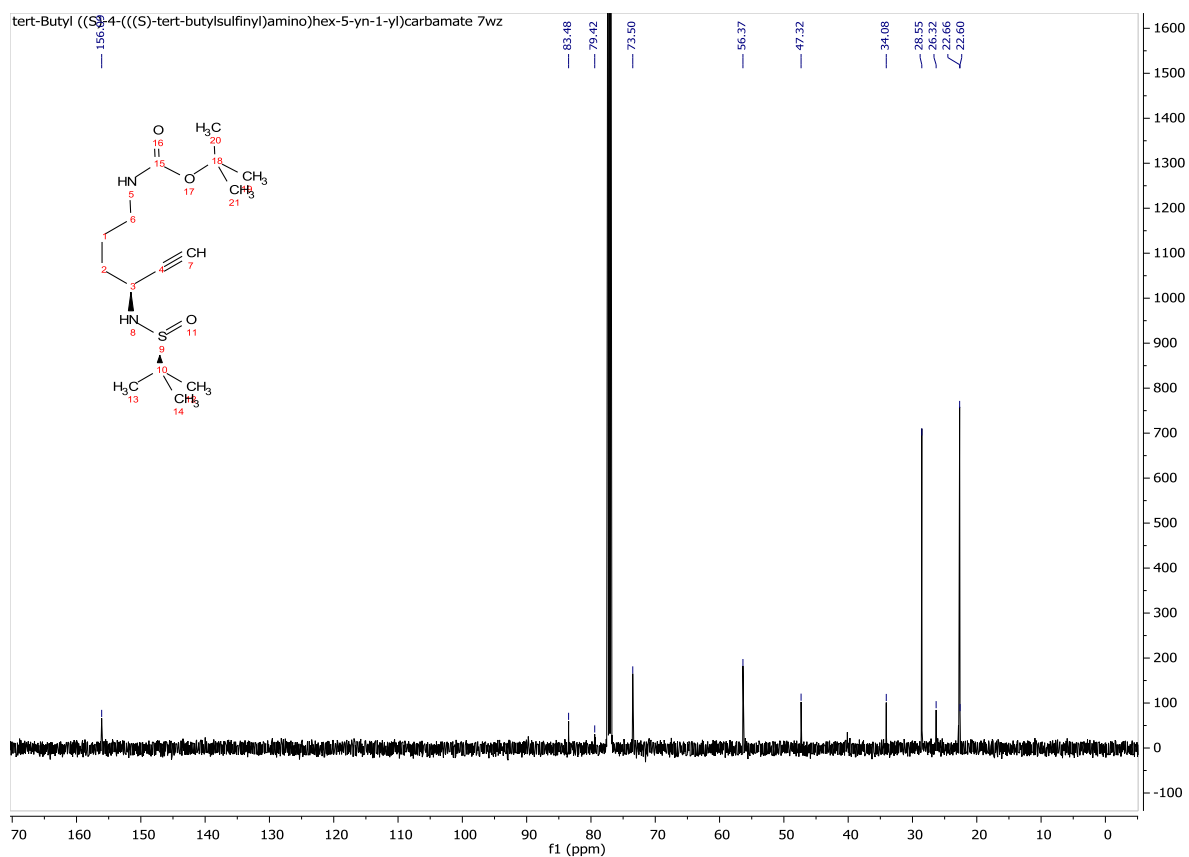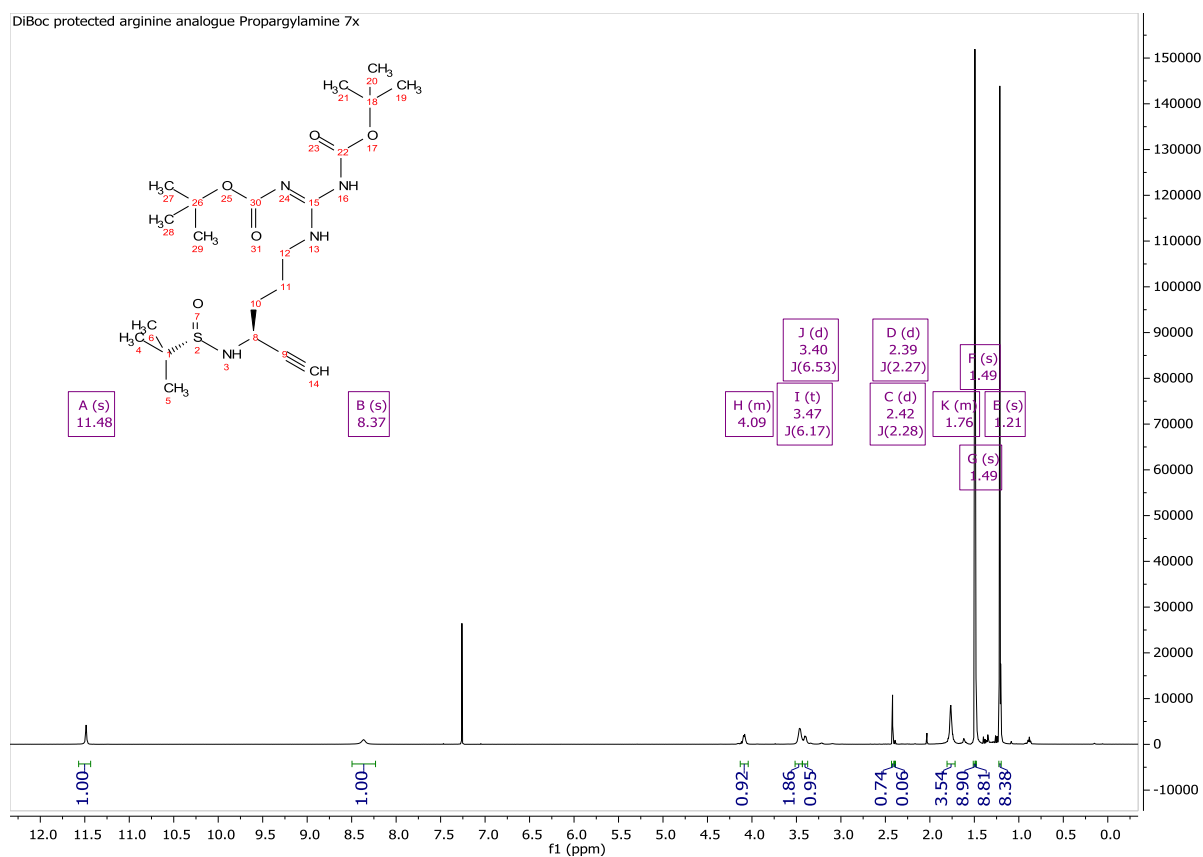

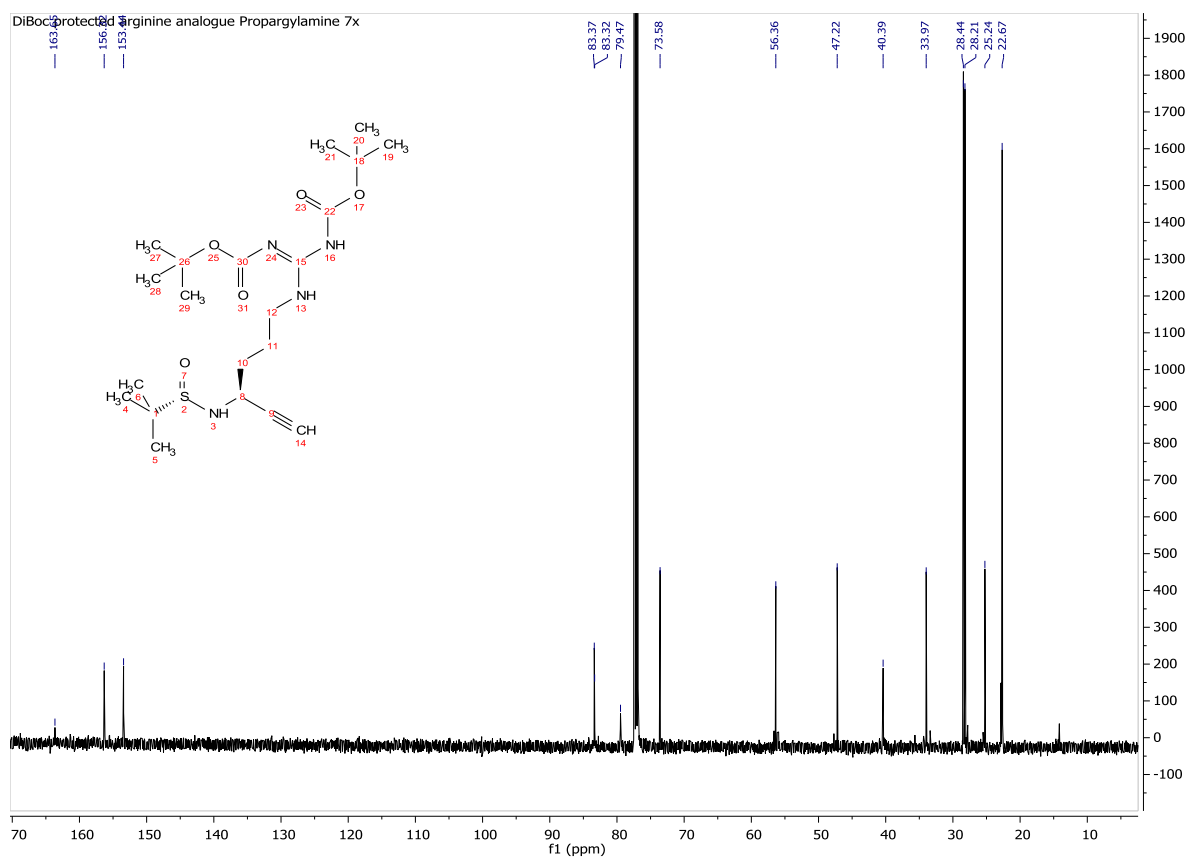

Hydrolysis of imine **5** forms hemiaminal **8**

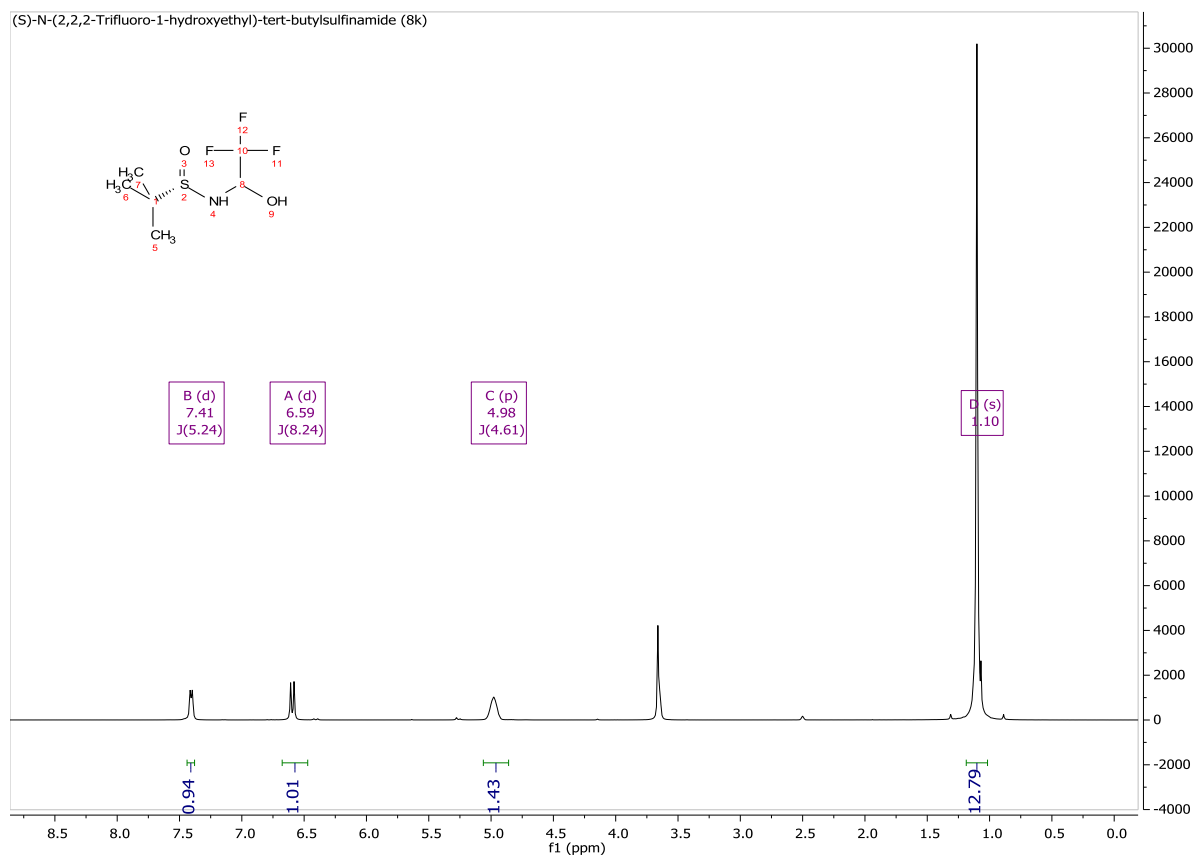

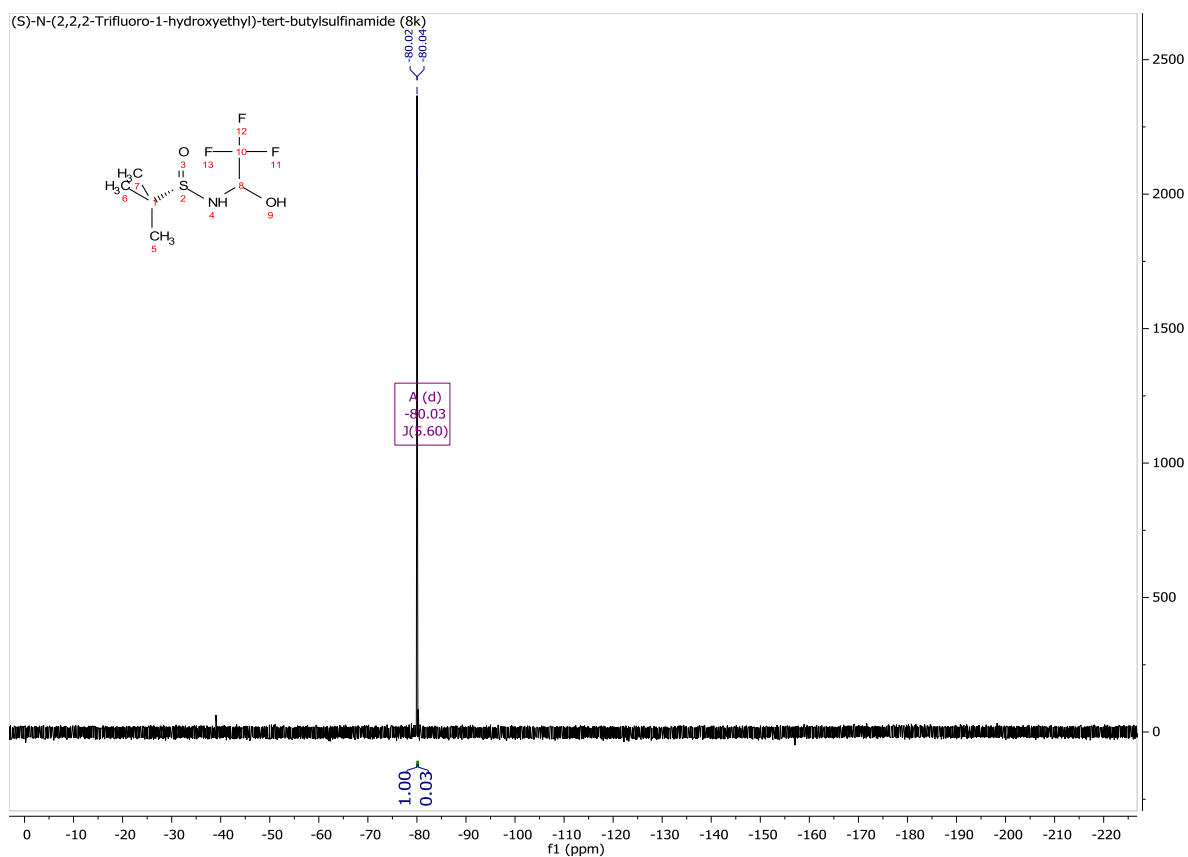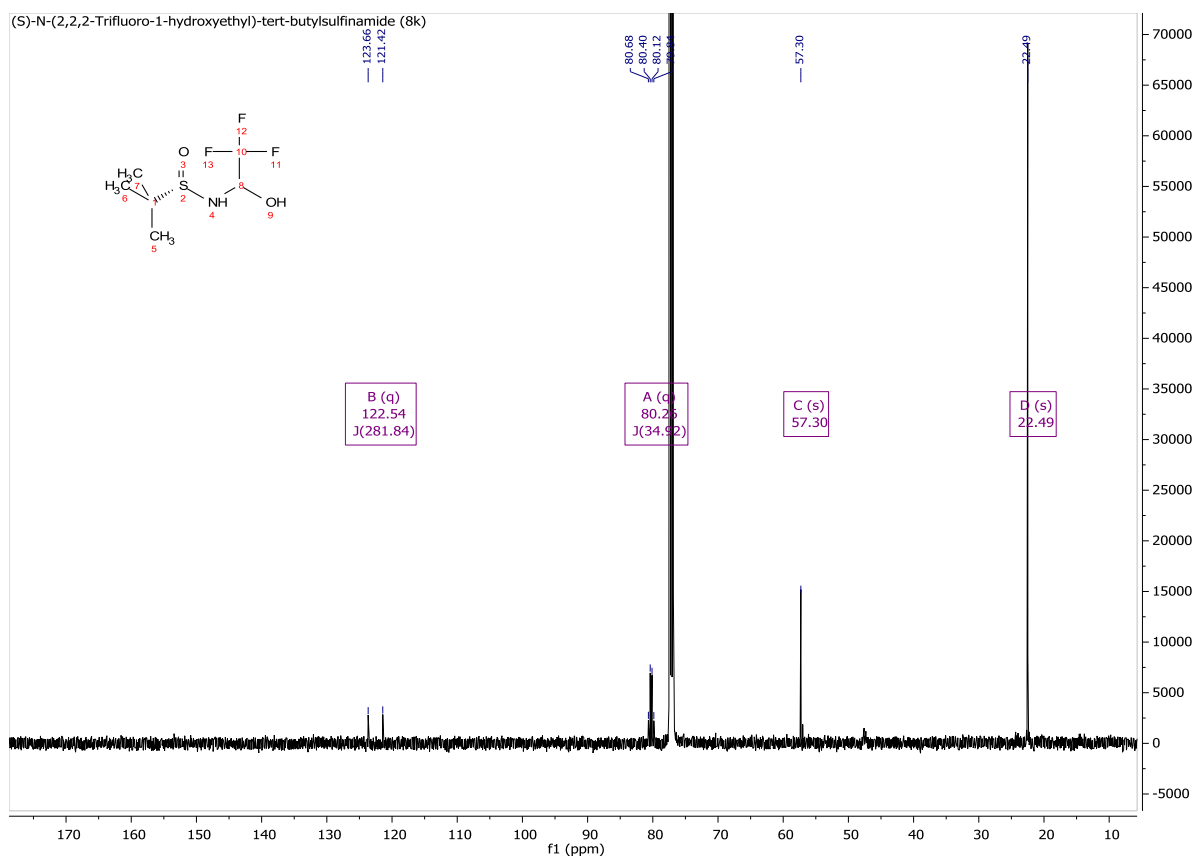

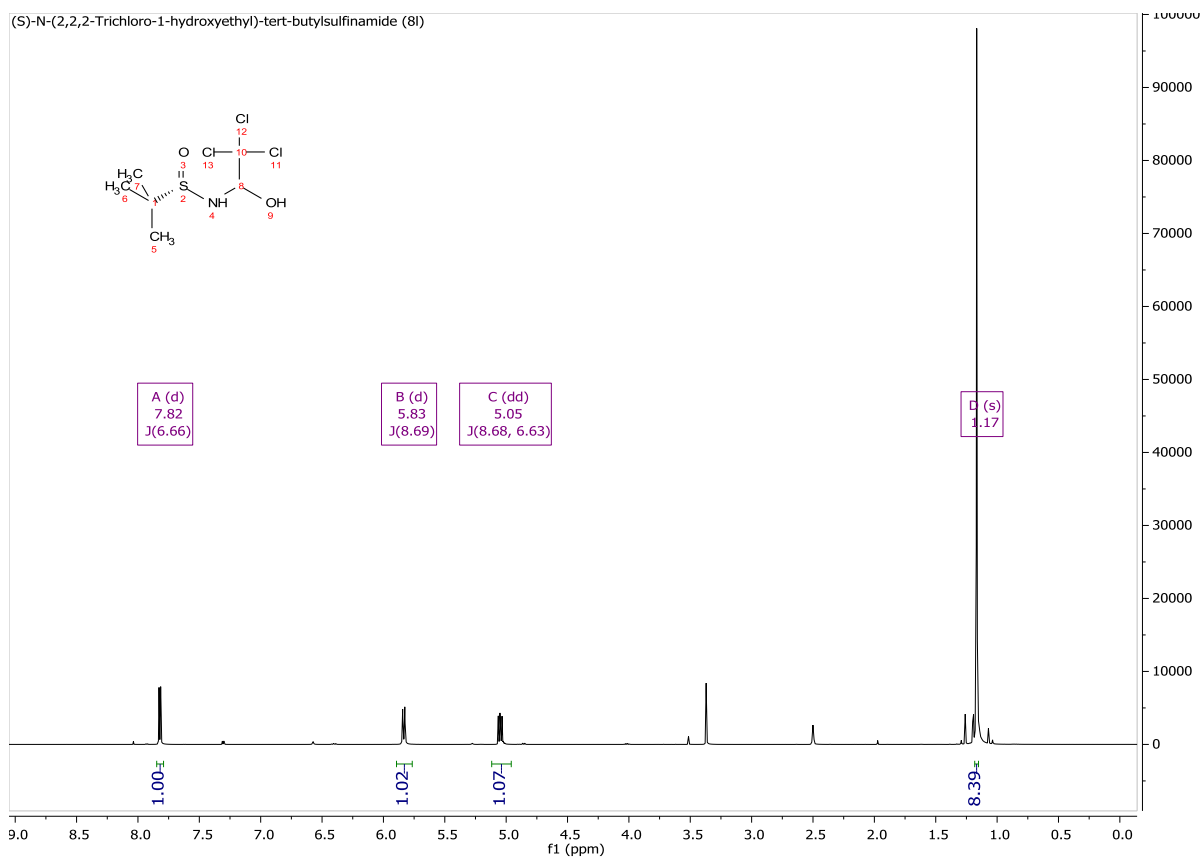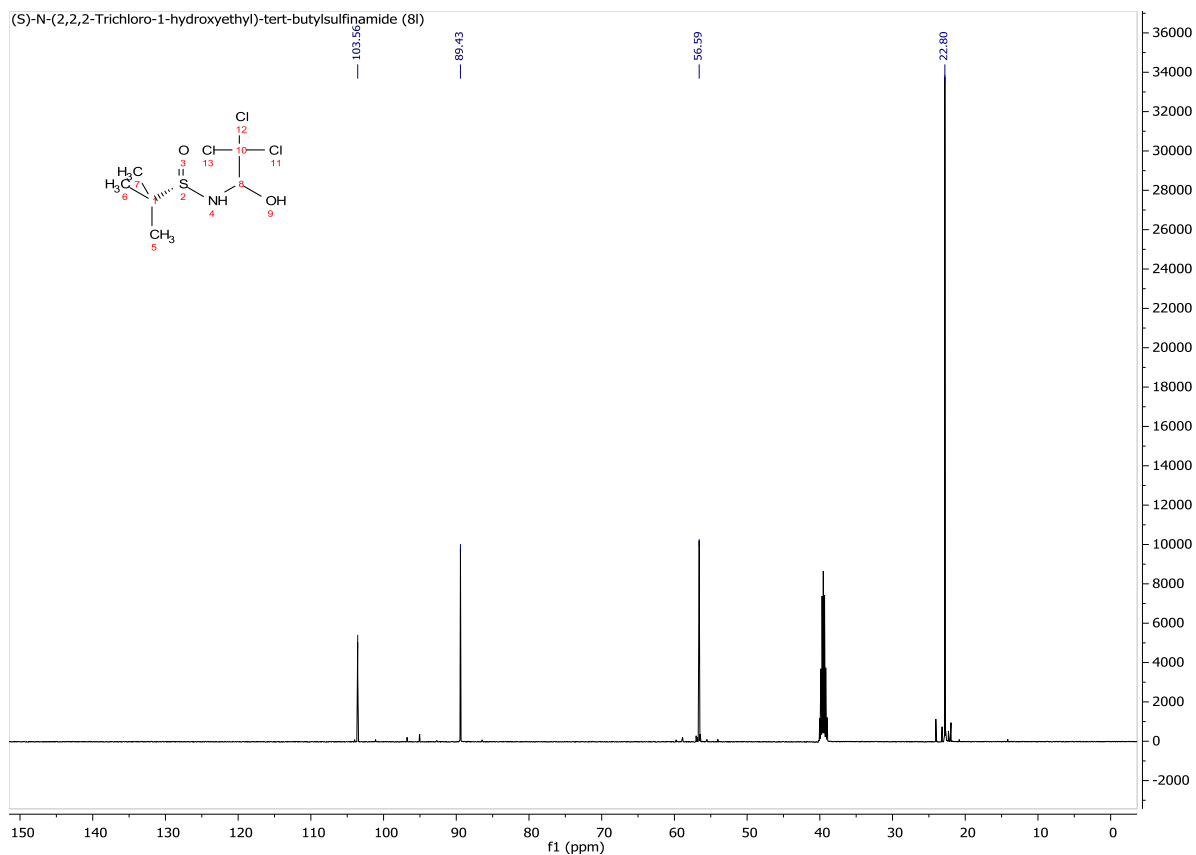

# Side-product **9k** of the conversion of **5k** under conditions GP-3

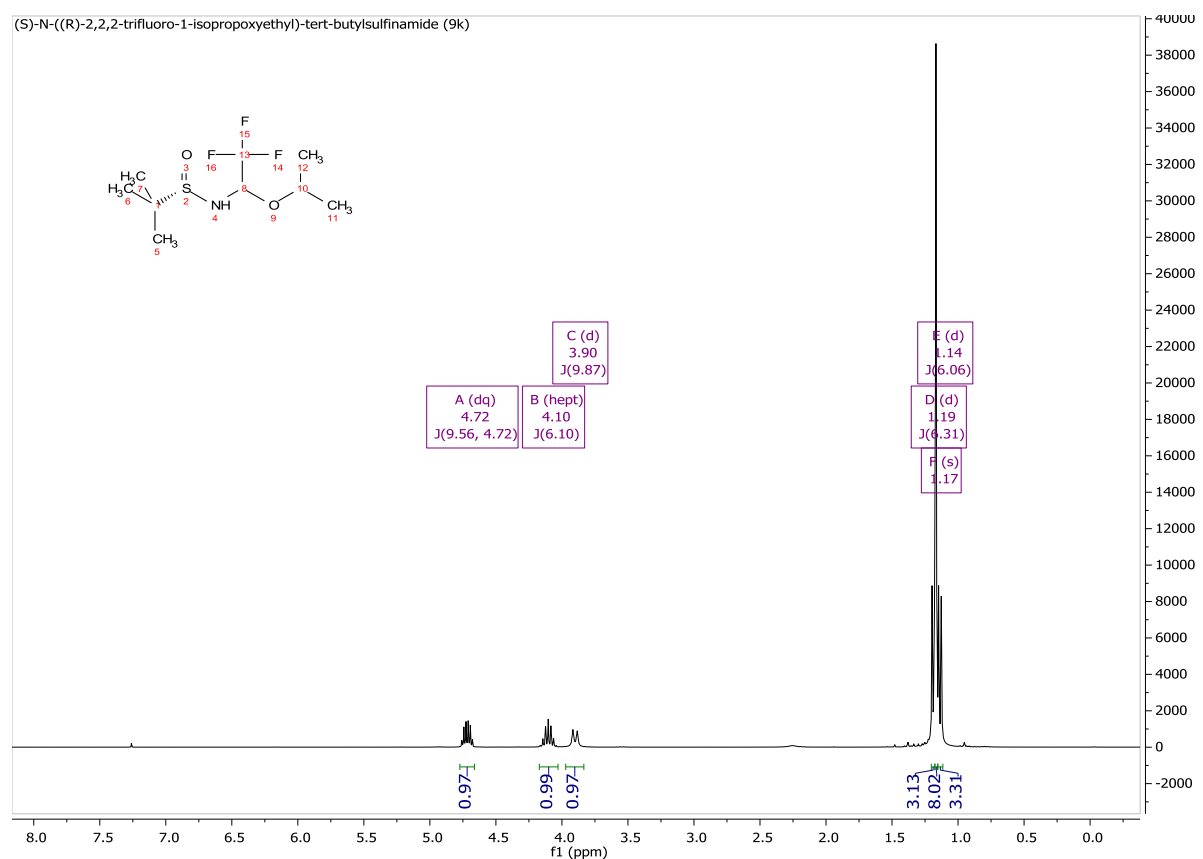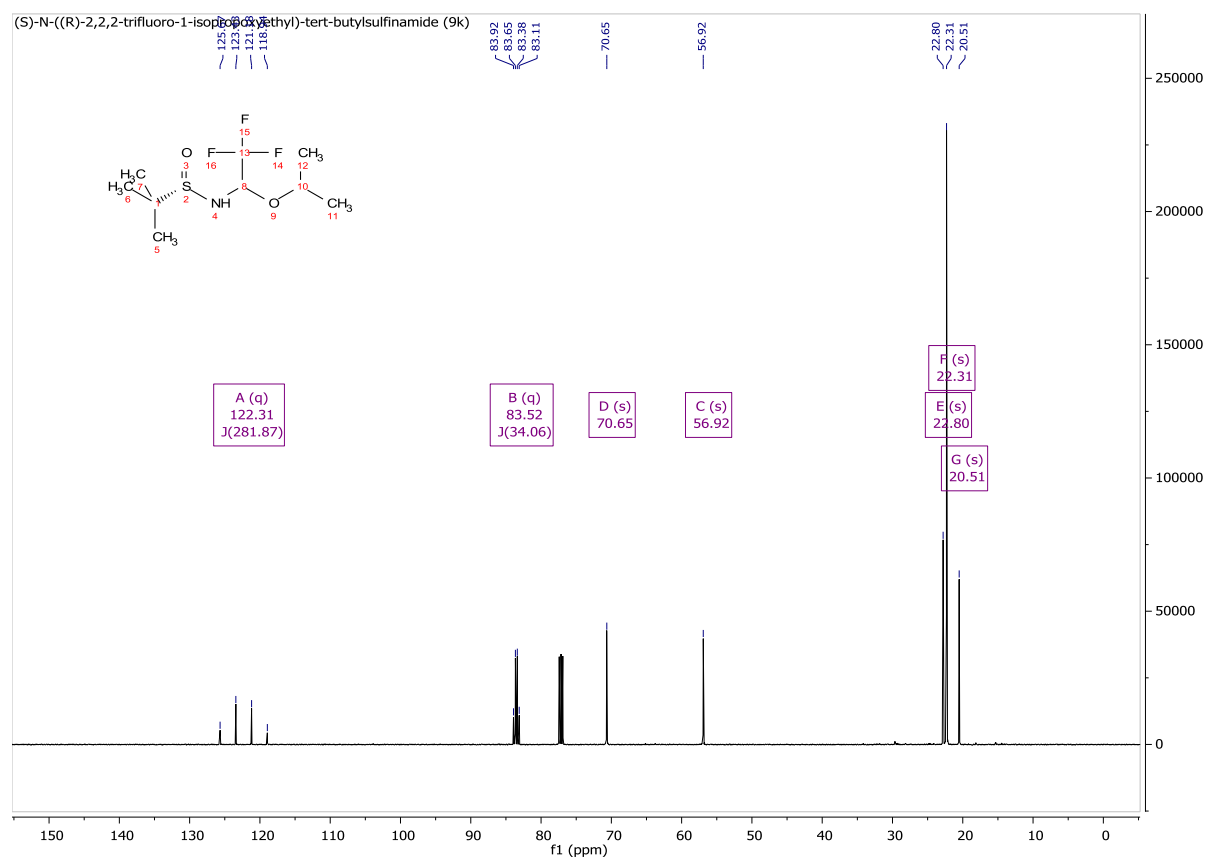

# Side-product **10k** of the conversion of **5k** under conditions GP-4

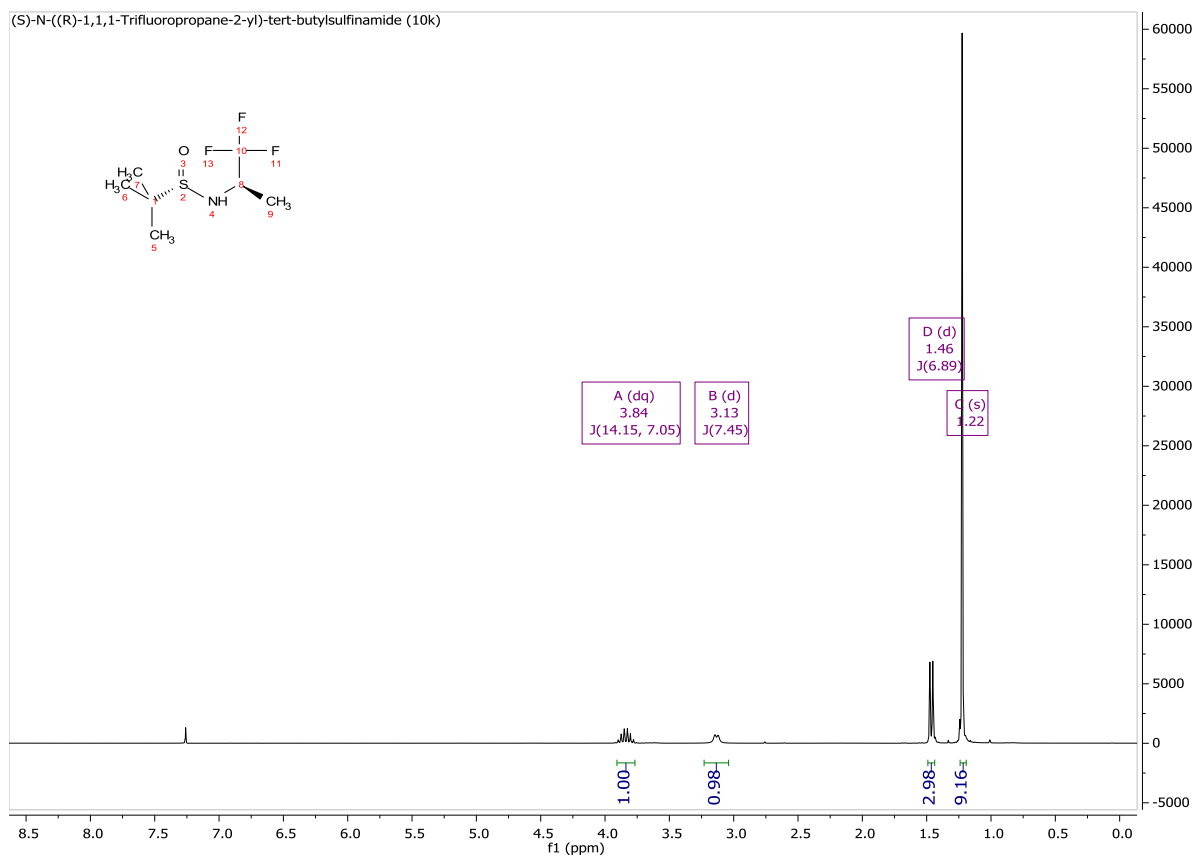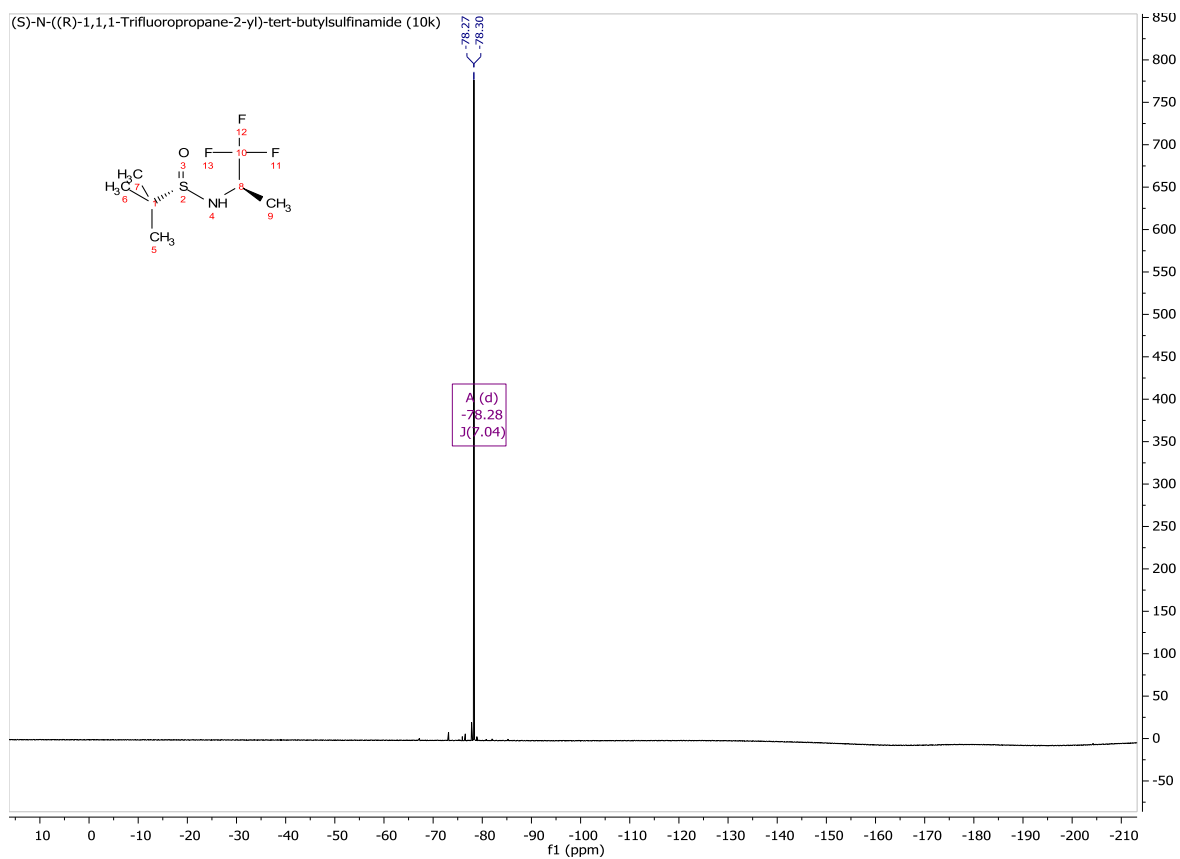



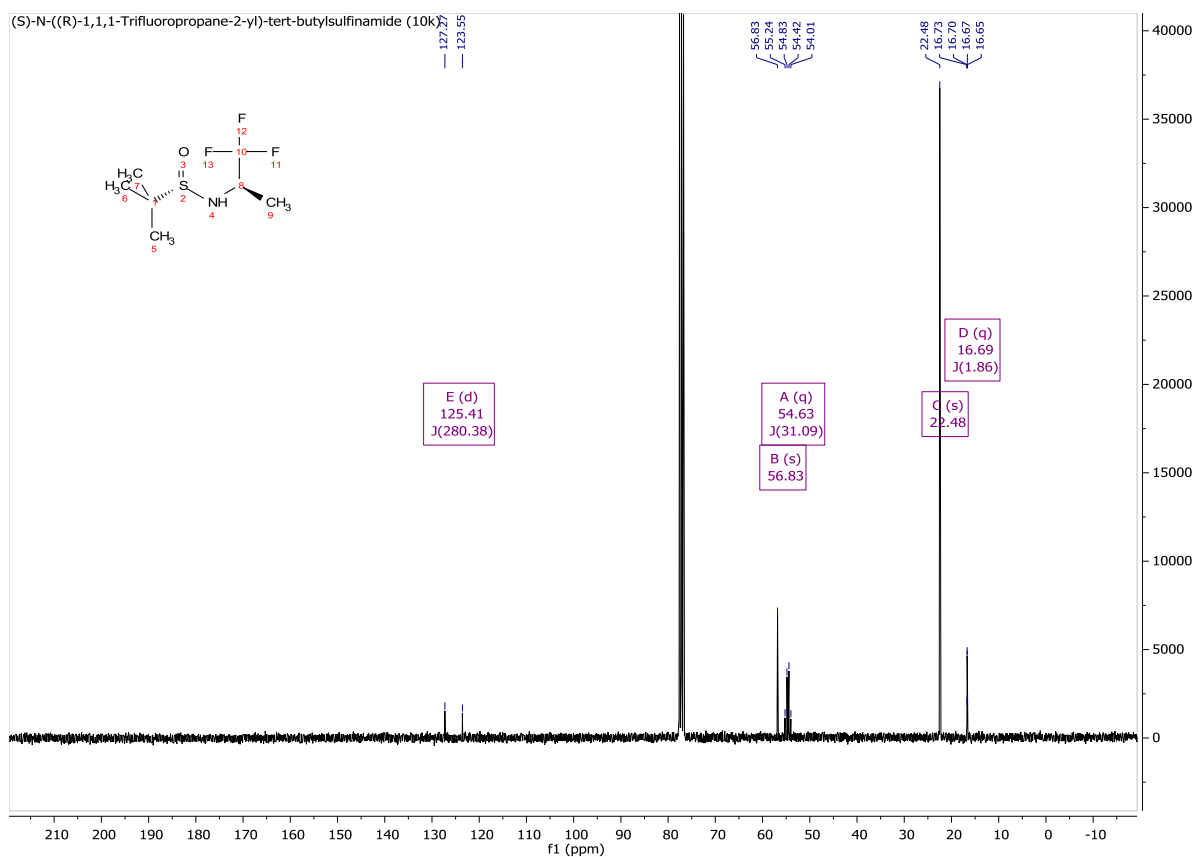

## Sonogashira cross-coupling products: Peptidomimetics 11

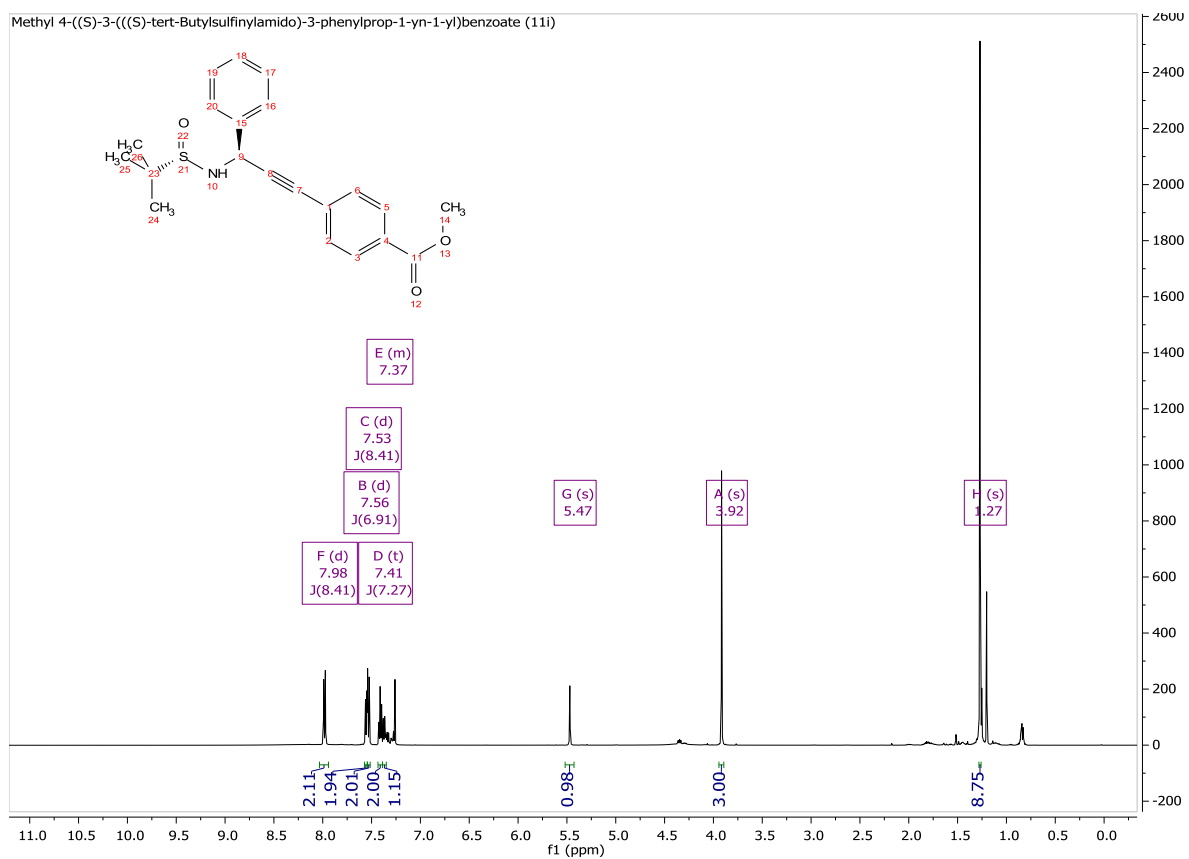

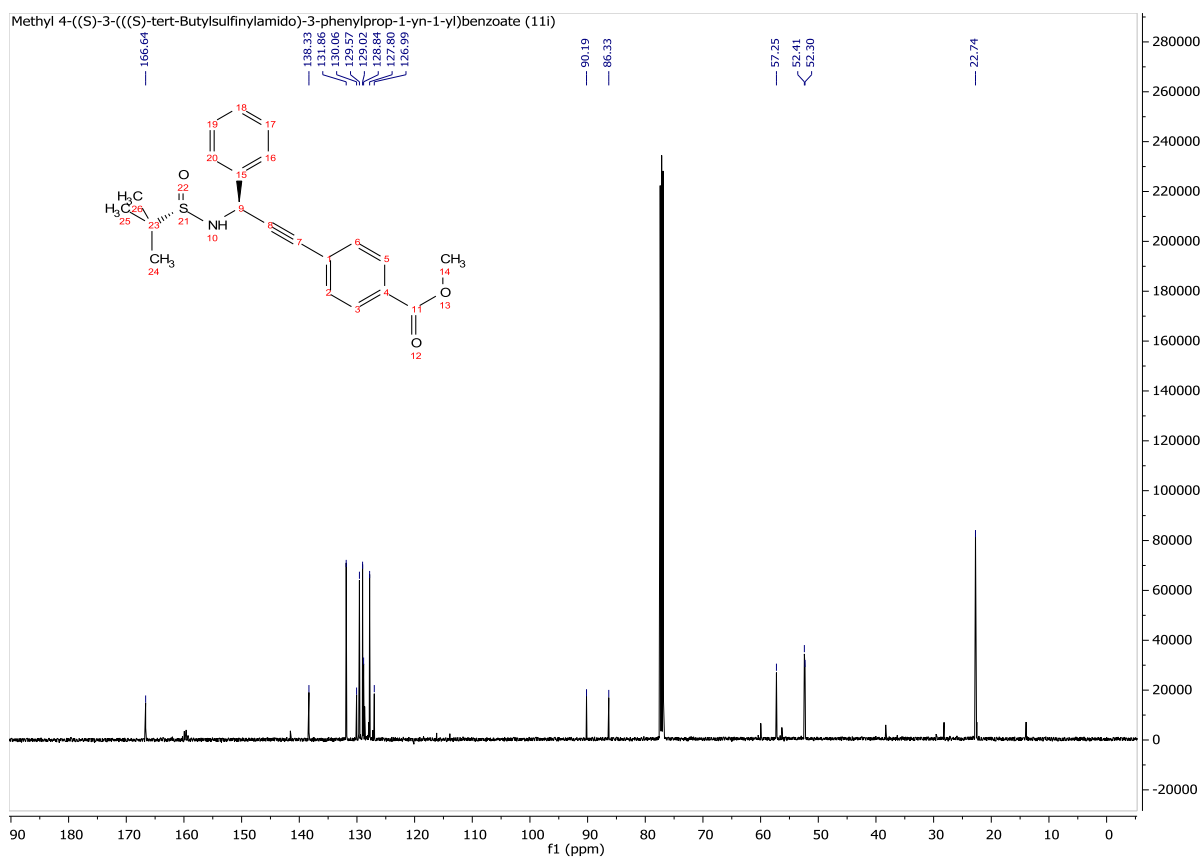

## Rearrangement products: $\alpha,\beta$ -unsaturated imines **12**

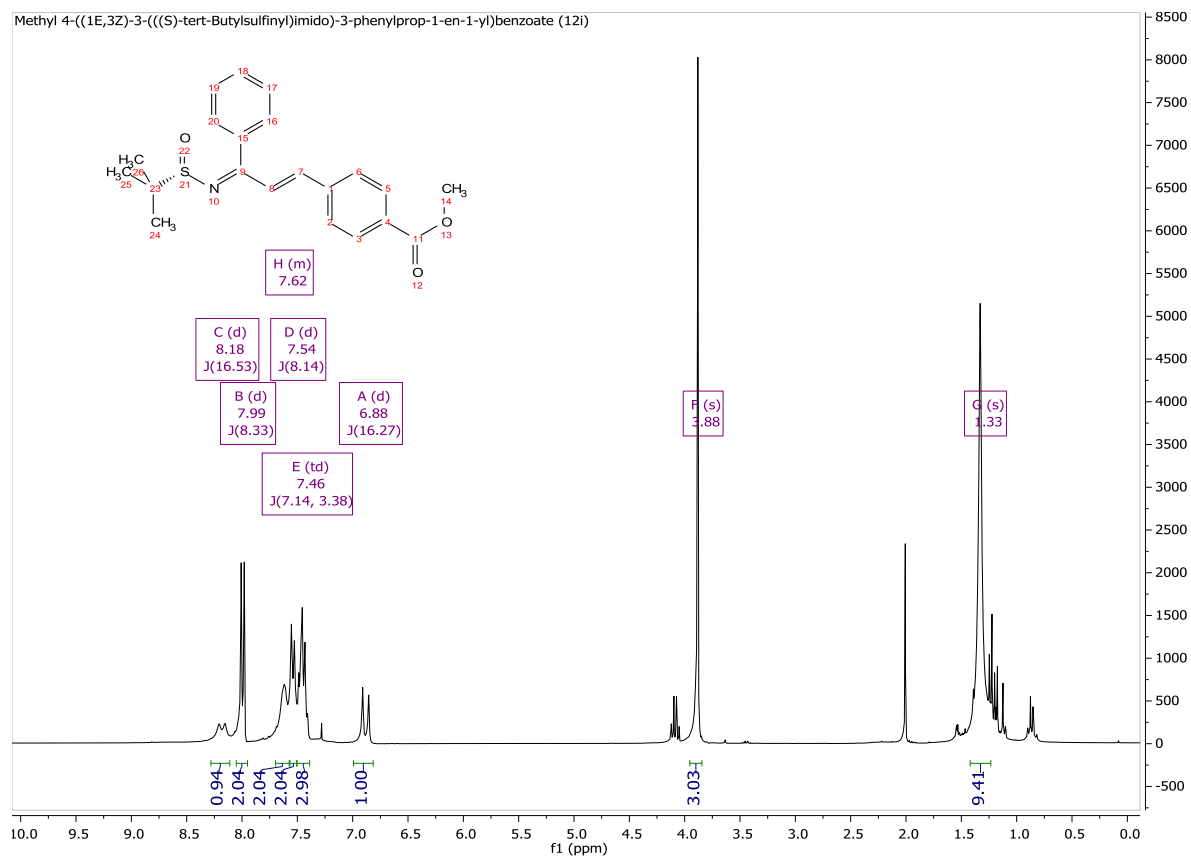

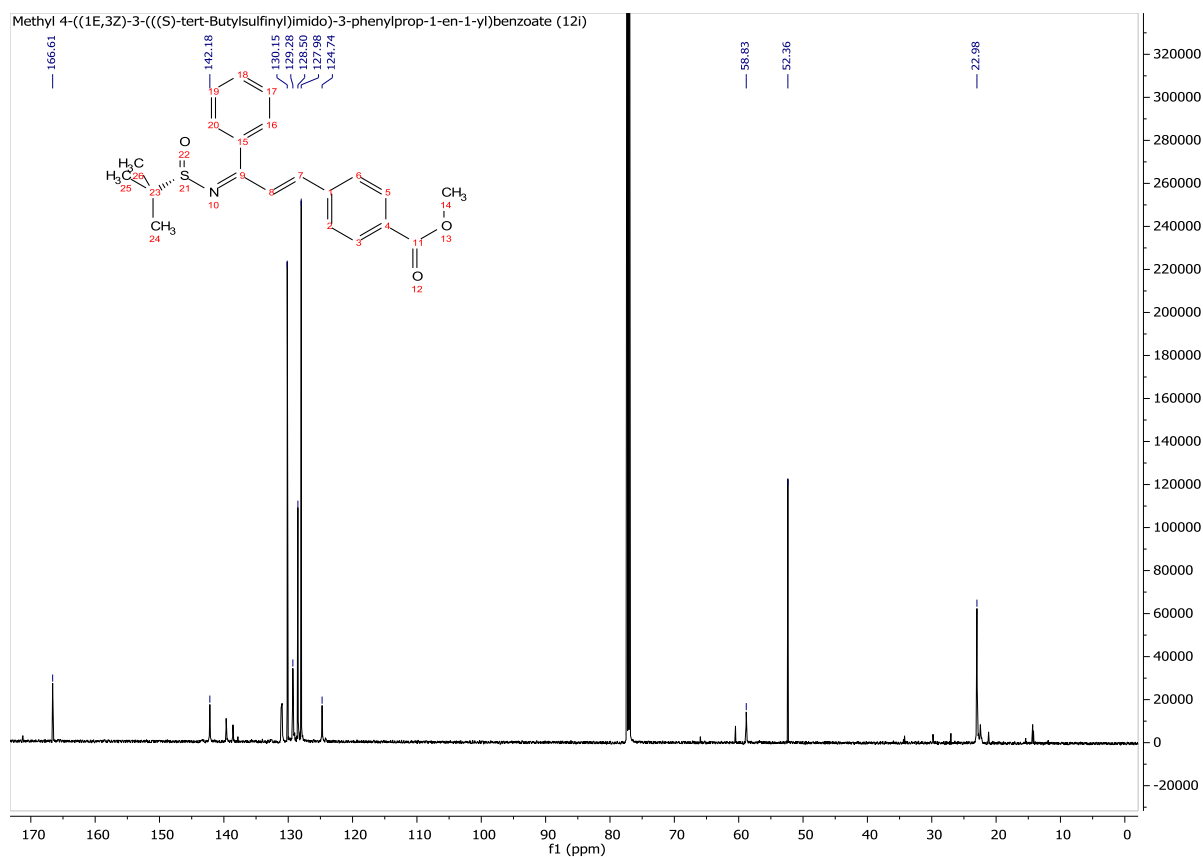

Intramolecular Huisgen reaction of **6w** gives triazole **13w**

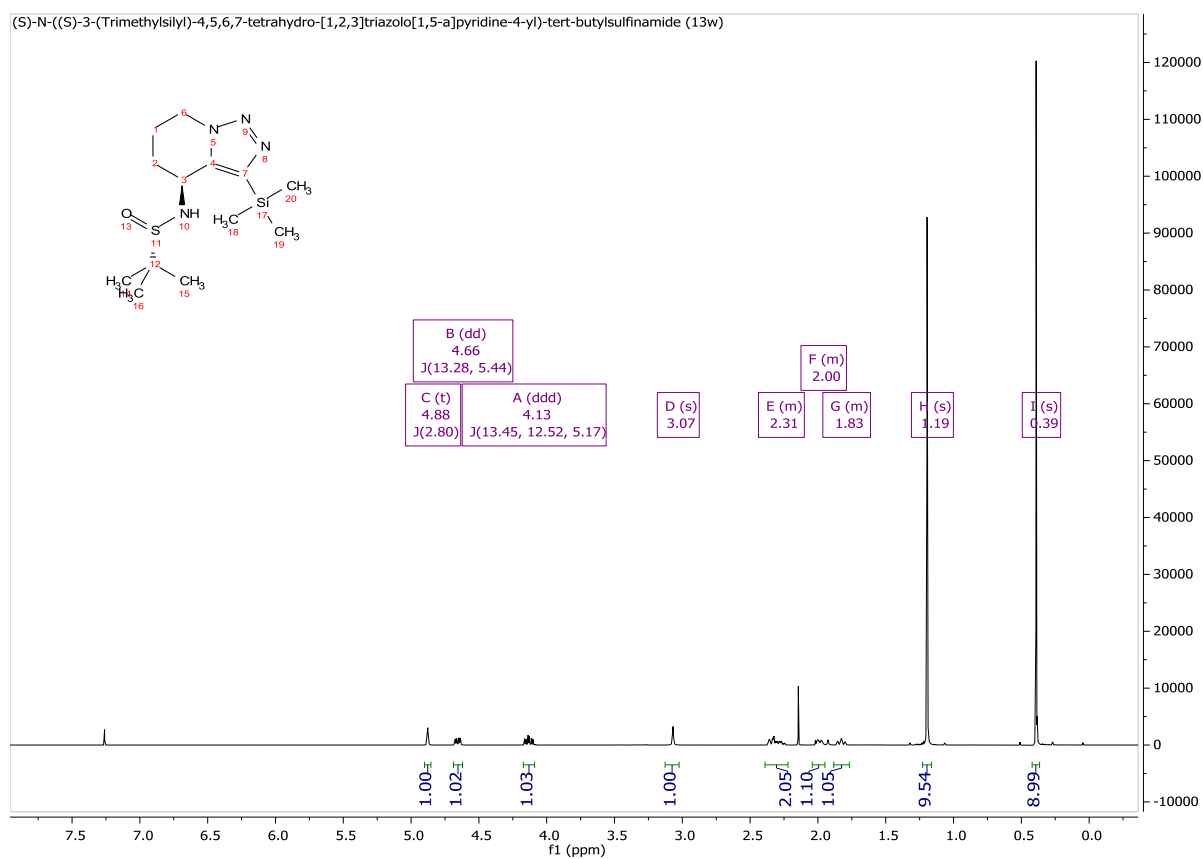

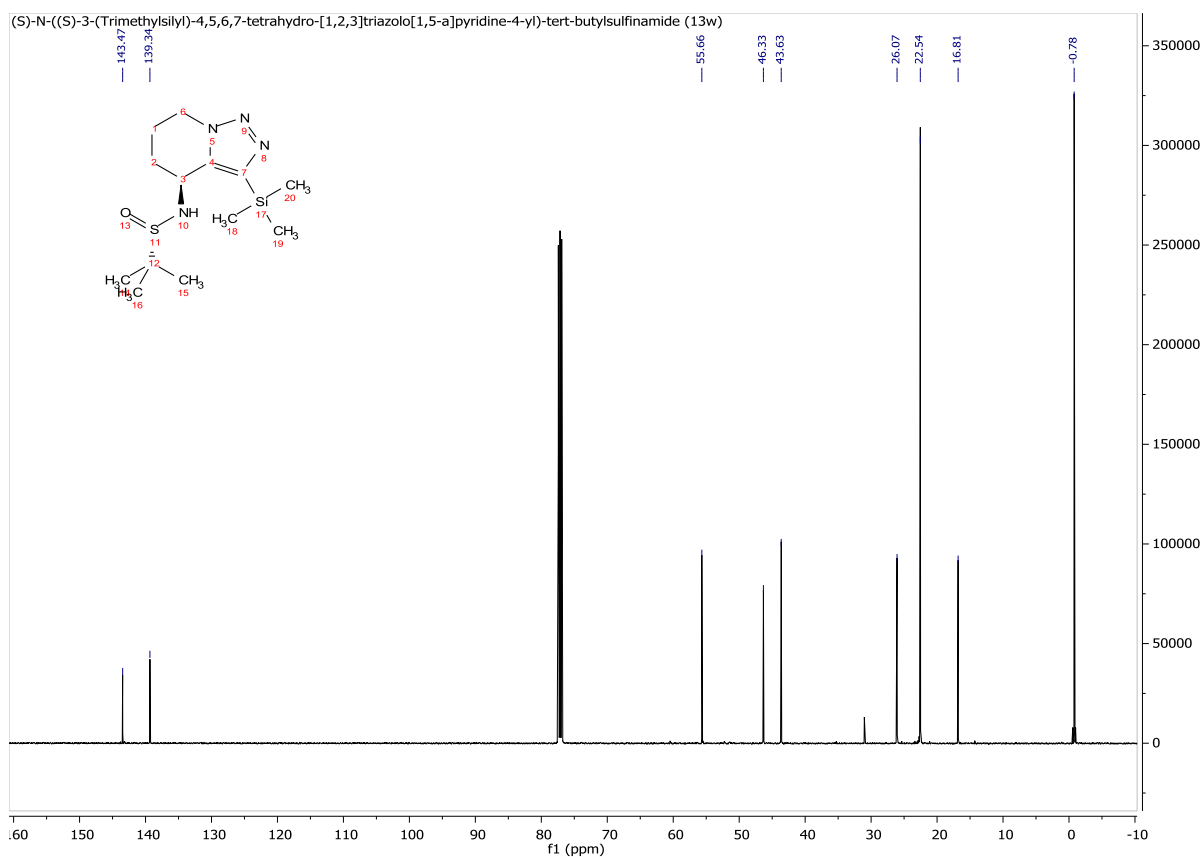

Intramolecular Huisgen reaction of **7wx** gives triazole **14w**

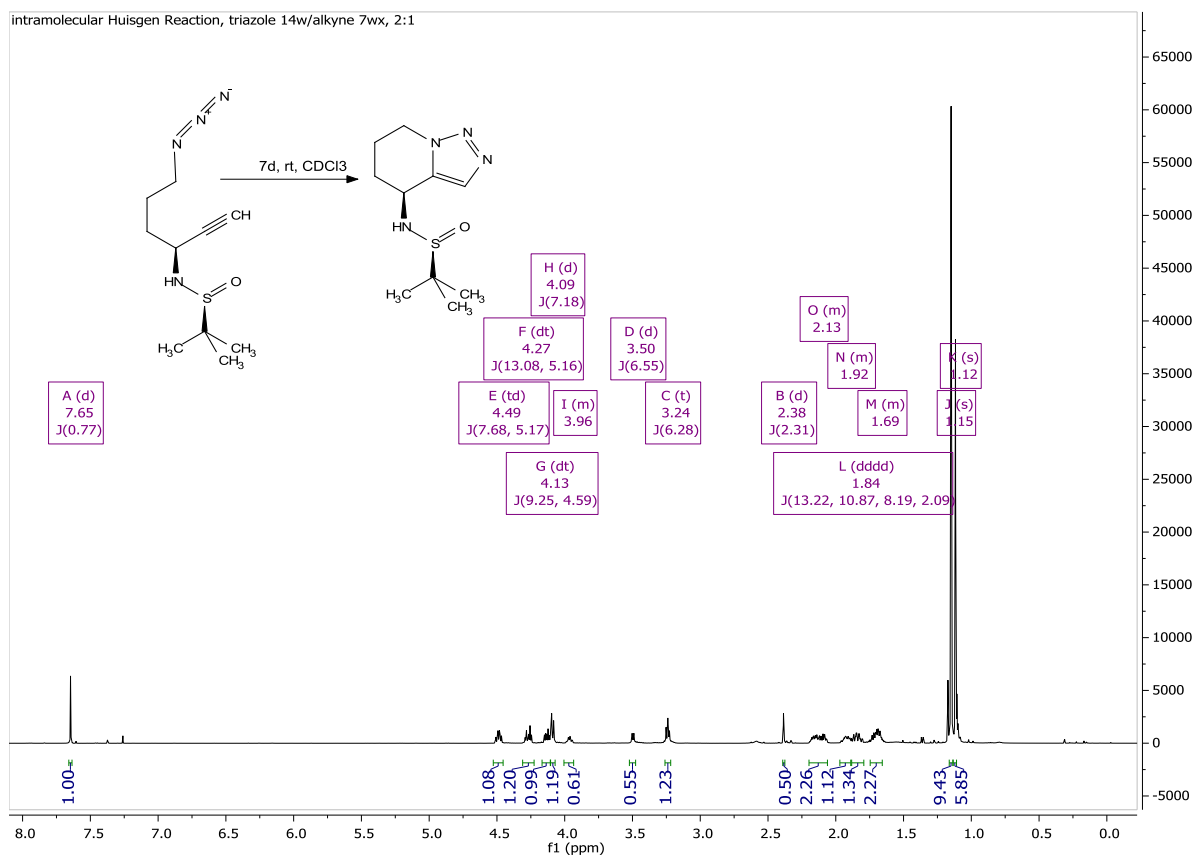

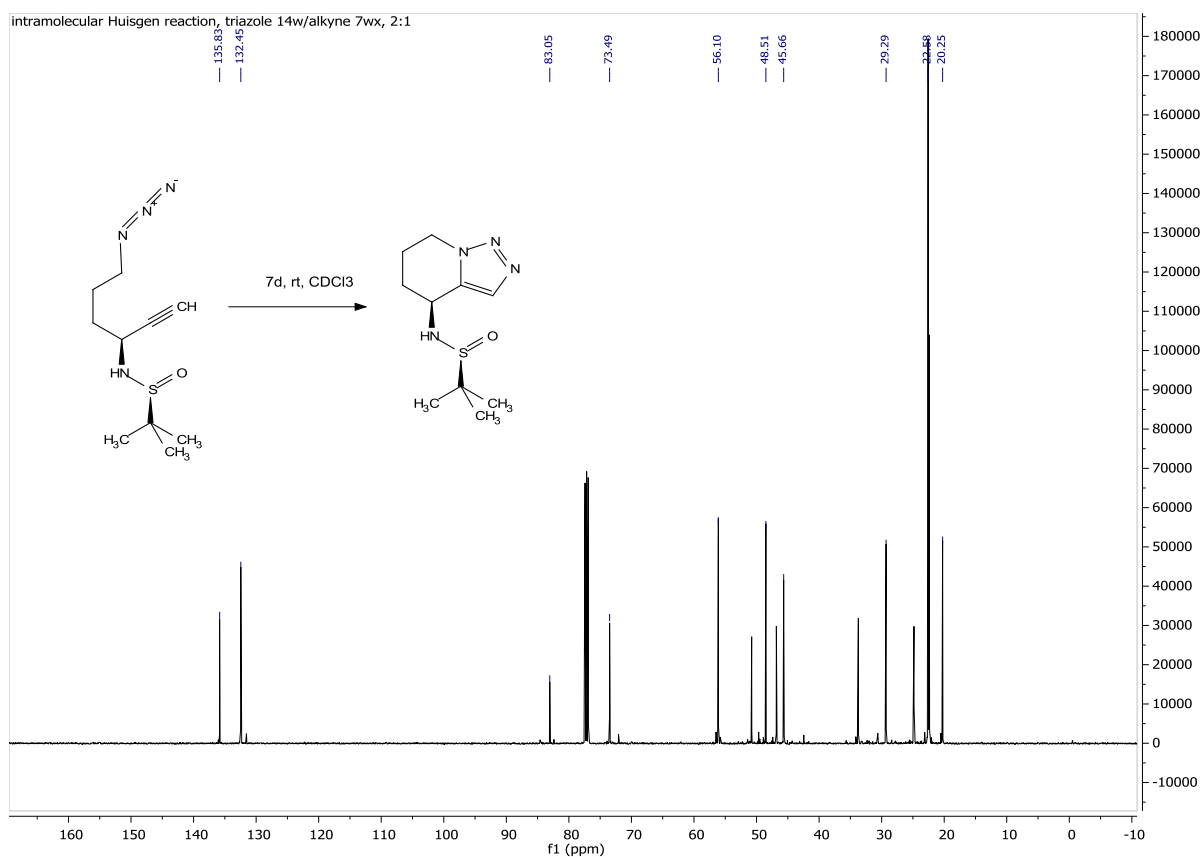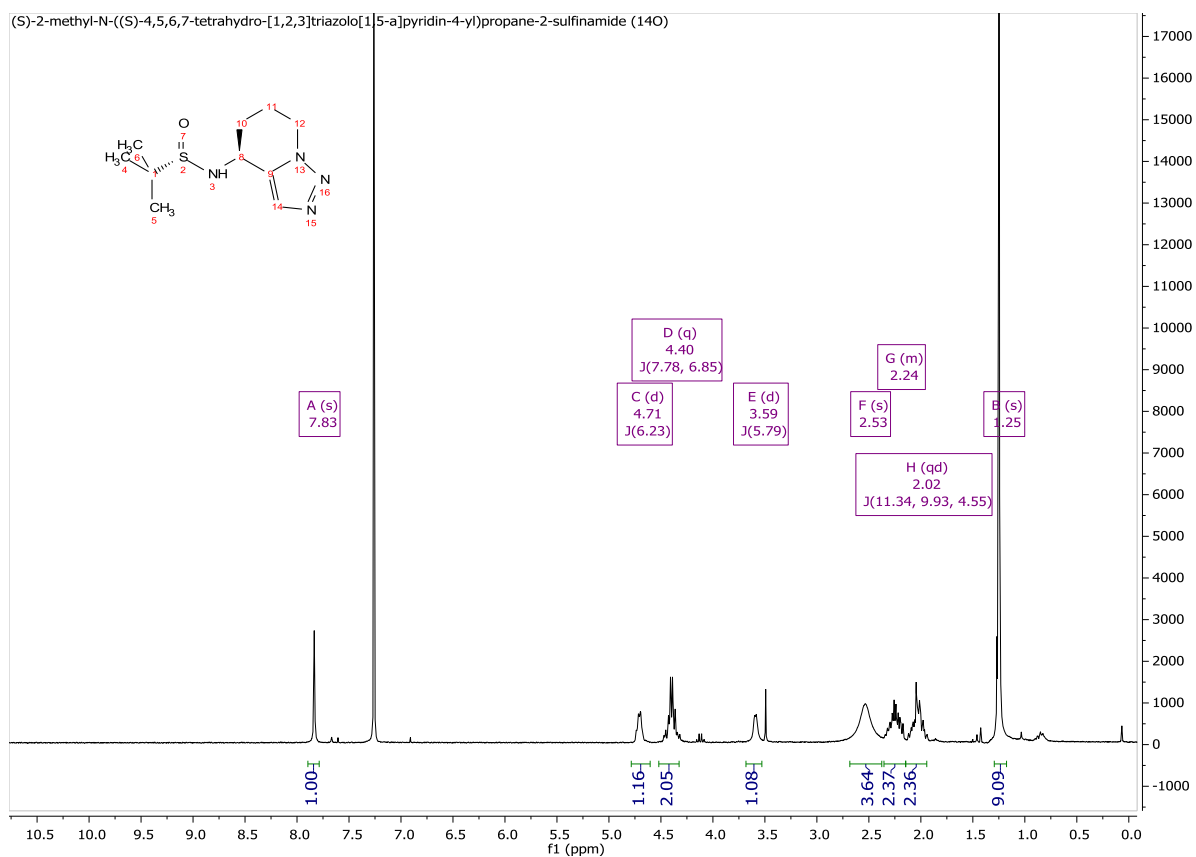

Supplement: Additional file 1 [file 1860-5397-13-240-S1.pdf]
